# Supplementary material for: <em>Actinobaculum massiliense</em> Proteome Profiled in Polymicrobial Urethral Catheter Biofilms
Source: Preprints.org preprint supplement (doi:10.20944/preprints201809.0500.v1), 2018-09-26
Supplement: Supplementary file 1 [file Suppl Materials File S2.xlsx]

## Sheet: Dataset S1
Suppl. Materials: Dataset S1. LC-MS/MS based proteomic data for five catheter biofilm extracts derived from specimens of two long-term catheterized patients and for one in vitro Actinobaculum massiliense cultured isolate
Worksheet 1: All microbial proteins identified using Sequest HT and Proteome Disocverer analysis process followed by peptide spectral match (PSM) quantification; the five columns on the right represent the five individual PSM datasets: two from patient 1; two from patient 5; one from a cultured A. massiliense isolate (SD_#6).
Worksheet 2: All A. massiliense proteins with PSM counts (columns J-N), normalized with total PSM count (columns O-S), averaged PSMs for CB samples (column T) and the quotients of normalized PSMs (column U; CB vs. in vitro)
Worksheet 3: All human proteins with PSM counts, normalized with total PSM count
Accession and protein descriptions are entries for accession numbers in UniProt (www.uniprot.org)

## Sheet: All microbial proteins
Accession	Description	Σ# PSMs	Σ# Peptides	Σ# Proteins	Σ# Unique Peptides	ΣCoverage	MW [kDa]	calc. pI	CB27	CB37	CB5	CB17	SD_#6
K9EFC3	Glyceraldehyde-3-phosphate dehydrogenase OS=Actinobaculum massiliense ACS-171-V-Col2 OX=883066 GN=HMPREF9233_01543 PE=3 SV=1 - [K9EFC3_9ACTO]	2517	20	1	19	77.45	36.5169	5.40186	682	371	94	64	1306
Q833I8	Glyceraldehyde-3-phosphate dehydrogenase OS=Enterococcus faecalis (strain ATCC 700802 / V583) GN=gap-2 PE=3 SV=1 - [Q833I8_ENTFA]	1889	15	1	12	59.46	35.7491	5.16064	96	143	1170	468	12
K9F007	Elongation factor Tu OS=Actinobaculum massiliense ACS-171-V-Col2 OX=883066 GN=tuf PE=3 SV=1 - [K9F007_9ACTO]	1737	18	1	16	67.93	43.811	5.05908	338	258	149	113	879
B4EVD6	Outer membrane protein A OS=Proteus mirabilis (strain HI4320) OX=529507 GN=ompA PE=3 SV=1 - [B4EVD6_PROMH]	1301	23	1	20	70.17	38.9936	5.84619	209	181	322	588	1
K9F1W5	Uncharacterized protein OS=Actinobaculum massiliense ACS-171-V-Col2 OX=883066 GN=HMPREF9233_00810 PE=3 SV=1 - [K9F1W5_9ACTO]	1267	53	1	53	50.97	200.04	4.66553	202	193	227	139	506
K9ECK4	Enolase OS=Actinobaculum massiliense ACS-171-V-Col2 OX=883066 GN=eno PE=3 SV=1 - [K9ECK4_9ACTO]	1187	16	1	16	63.62	45.4067	4.66553	338	129	46	27	647
K9EVG4	Uncharacterized protein (Fragment) OS=Actinobaculum massiliense ACS-171-V-Col2 OX=883066 GN=HMPREF9233_01095 PE=3 SV=1 - [K9EVG4_9ACTO]	1000	38	1	38	33.53	191.97	4.55127	212	208	295	277	8
K9EUD5	Phosphoglycerate kinase OS=Actinobaculum massiliense ACS-171-V-Col2 OX=883066 GN=pgk PE=3 SV=1 - [K9EUD5_9ACTO]	926	18	1	18	62.72	41.9516	4.70361	266	136	38	0	486
K9EHZ4	Uncharacterized protein (Fragment) OS=Actinobaculum massiliense ACS-171-V-Col2 OX=883066 GN=HMPREF9233_00826 PE=4 SV=1 - [K9EHZ4_9ACTO]	899	35	1	35	62.24	96.6908	5.14795	257	210	164	174	94
K9EDH9	60 kDa chaperonin OS=Actinobaculum massiliense ACS-171-V-Col2 OX=883066 GN=groL PE=3 SV=1 - [K9EDH9_9ACTO]	854	28	1	27	69.44	56.9269	4.86865	188	71	51	69	475
B4EV98	Formate acetyltransferase OS=Proteus mirabilis (strain HI4320) OX=529507 GN=pflB PE=4 SV=1 - [B4EV98_PROMH]	836	35	1	28	64.61	85.4065	5.46533	240	149	176	271	0
P0DM31	Enolase OS=Enterococcus faecalis (strain ATCC 700802 / V583) GN=eno PE=3 SV=1 - [ENO_ENTFA]	812	21	1	20	67.36	46.4825	4.67822	85	112	376	239	0
K9EDQ2	50S ribosomal protein L7/L12 OS=Actinobaculum massiliense ACS-171-V-Col2 OX=883066 GN=rplL PE=3 SV=1 - [K9EDQ2_9ACTO]	798	9	1	9	89.06	13.0658	4.44971	196	147	80	44	331
B4EXT7	Glyceraldehyde-3-phosphate dehydrogenase OS=Proteus mirabilis (strain HI4320) OX=529507 GN=gapA PE=3 SV=1 - [B4EXT7_PROMH]	771	20	1	16	79.46	35.5183	6.80029	173	136	162	300	0
K9EF57	Uncharacterized protein OS=Actinobaculum massiliense ACS-171-V-Col2 OX=883066 GN=HMPREF9233_01453 PE=3 SV=1 - [K9EF57_9ACTO]	759	15	1	15	74.63	35.8602	5.13525	190	153	24	9	383
K9EVP0	Uncharacterized protein OS=Actinobaculum massiliense ACS-171-V-Col2 OX=883066 GN=HMPREF9233_01185 PE=4 SV=1 - [K9EVP0_9ACTO]	727	12	1	12	35.45	63.7386	4.58936	250	163	114	45	155
F2I4F7	D-xylulose 5-phosphate/D-fructose 6-phosphate phosphoketolase OS=Aerococcus urinae (strain ACS-120-V-Col10a) GN=xfp PE=4 SV=1 - [F2I4F7_AERUA]	722	25	1	25	47.91	89.466	5.021	436	286	0	0	0
F2I7R4	Elongation factor Tu OS=Aerococcus urinae (strain ACS-120-V-Col10a) GN=tuf PE=3 SV=1 - [F2I7R4_AERUA]	717	17	1	14	69.54	43.1176	4.80518	230	303	0	0	184
B4EYV6	Elongation factor Tu OS=Proteus mirabilis (strain HI4320) OX=529507 GN=tufB PE=3 SV=1 - [B4EYV6_PROMH]	714	18	1	2	64.47	43.1851	5.21143	179	140	163	232	0
Q835R7	Chaperone protein DnaK OS=Enterococcus faecalis (strain ATCC 700802 / V583) GN=dnaK PE=3 SV=1 - [DNAK_ENTFA]	710	33	1	29	60.1	65.5436	4.729	48	51	418	193	0
K9EGZ6	Uncharacterized protein OS=Actinobaculum massiliense ACS-171-V-Col2 OX=883066 GN=HMPREF9233_00680 PE=4 SV=1 - [K9EGZ6_9ACTO]	704	27	1	27	64.33	57.1063	4.81787	117	32	2	1	552
Q1R5U4	Elongation factor Tu 2 OS=Escherichia coli (strain UTI89 / UPEC) GN=tuf2 PE=3 SV=2 - [EFTU2_ECOUT]	679	20	2	9	74.62	43.2863	5.45264	184	133	113	249	0
K9EDB6	Uncharacterized protein OS=Actinobaculum massiliense ACS-171-V-Col2 OX=883066 GN=HMPREF9233_01650 PE=4 SV=1 - [K9EDB6_9ACTO]	671	16	1	16	70.13	43.4013	5.05908	296	278	21	9	67
Q839G8	Elongation factor Tu OS=Enterococcus faecalis (strain ATCC 700802 / V583) GN=tuf PE=3 SV=1 - [EFTU_ENTFA]	652	21	1	18	78.48	43.3607	4.83057	83	124	275	163	7
K9EC31	Elongation factor G OS=Actinobaculum massiliense ACS-171-V-Col2 OX=883066 GN=fusA PE=3 SV=1 - [K9EC31_9ACTO]	643	29	1	28	67.46	78.0466	5.05908	170	98	65	15	295
B4EUF7	Enolase OS=Proteus mirabilis (strain HI4320) OX=529507 GN=eno PE=3 SV=1 - [ENO_PROMH]	640	14	1	8	49.42	45.8834	5.23682	163	107	152	218	0
Q1RB13	Glyceraldehyde-3-phosphate dehydrogenase OS=Escherichia coli (strain UTI89 / UPEC) GN=gapA PE=3 SV=1 - [Q1RB13_ECOUT]	634	17	1	13	67.37	35.9334	6.80029	134	124	97	279	0
Q1R7R4	Enolase OS=Escherichia coli (strain UTI89 / UPEC) GN=eno PE=3 SV=1 - [ENO_ECOUT]	604	16	1	10	61.57	45.6264	5.47803	174	112	79	239	0
Q833I9	Phosphoglycerate kinase OS=Enterococcus faecalis (strain ATCC 700802 / V583) GN=pgk PE=3 SV=1 - [PGK_ENTFA]	601	26	1	24	76.57	42.371	5.0083	50	58	364	129	0
K9EX04	Aminopeptidase N OS=Actinobaculum massiliense ACS-171-V-Col2 OX=883066 GN=HMPREF9233_00274 PE=4 SV=1 - [K9EX04_9ACTO]	598	35	1	35	55.75	94.4469	4.64014	180	77	132	10	199
Q1RDQ7	Outer membrane protein A OS=Escherichia coli (strain UTI89 / UPEC) GN=ompA PE=3 SV=1 - [Q1RDQ7_ECOUT]	570	16	1	13	52.53	40.6955	7.03467	110	110	49	301	0
B4F2V5	Chaperone protein DnaK OS=Proteus mirabilis (strain HI4320) OX=529507 GN=dnaK PE=3 SV=1 - [DNAK_PROMH]	563	31	1	22	65.83	69.2406	4.93213	109	52	166	233	3
F2I5M9	Aldehyde-alcohol dehydrogenase OS=Aerococcus urinae (strain ACS-120-V-Col10a) GN=HMPREF9243_0076 PE=3 SV=1 - [F2I5M9_AERUA]	552	29	1	29	49.72	96.4235	6.55127	344	208	0	0	0
K9EZB7	Pyruvate kinase OS=Actinobaculum massiliense ACS-171-V-Col2 OX=883066 GN=HMPREF9233_01527 PE=3 SV=1 - [K9EZB7_9ACTO]	552	21	1	21	69.83	51.1157	5.50342	211	76	14	20	231
F2I797	Kinase, PfkB family OS=Aerococcus urinae (strain ACS-120-V-Col10a) GN=HMPREF9243_0400 PE=4 SV=1 - [F2I797_AERUA]	521	14	1	14	50.16	34.4299	4.70361	274	247	0	0	0
K9EG07	ATP synthase subunit beta OS=Actinobaculum massiliense ACS-171-V-Col2 OX=883066 GN=atpD PE=3 SV=1 - [K9EG07_9ACTO]	513	23	1	22	75.93	52.8198	4.66553	157	77	44	18	217
K9EGB7	Uncharacterized protein OS=Actinobaculum massiliense ACS-171-V-Col2 OX=883066 GN=HMPREF9233_01335 PE=4 SV=1 - [K9EGB7_9ACTO]	503	11	1	11	46.42	40.1254	4.7417	82	53	2	0	366
K9EUF0	Mannonate dehydratase OS=Actinobaculum massiliense ACS-171-V-Col2 OX=883066 GN=uxuA PE=3 SV=1 - [K9EUF0_9ACTO]	484	17	1	17	76.55	42.206	5.03369	107	58	83	42	194
B4EWN9	Major outer membrane lipoprotein (Murein-lipoprotein) OS=Proteus mirabilis (strain HI4320) OX=529507 GN=lpp PE=4 SV=1 - [B4EWN9_PROMH]	469	3	1	3	46.84	8.36128	8.83643	63	45	80	281	0
K9EXA7	Uncharacterized protein OS=Actinobaculum massiliense ACS-171-V-Col2 OX=883066 GN=HMPREF9233_00404 PE=4 SV=1 - [K9EXA7_9ACTO]	462	29	1	29	46.76	91.3464	5.49072	85	54	1	0	322
K9EGC0	Formate acetyltransferase OS=Actinobaculum massiliense ACS-171-V-Col2 OX=883066 GN=HMPREF9233_01340 PE=4 SV=1 - [K9EGC0_9ACTO]	453	25	1	24	61.77	77.9927	5.05908	86	38	34	4	291
Q837E3	Aldehyde-alcohol dehydrogenase OS=Enterococcus faecalis (strain ATCC 700802 / V583) GN=adhE PE=3 SV=1 - [Q837E3_ENTFA]	436	29	1	29	52.83	92.3057	6.04932	6	14	197	219	0
K9EHA7	2,3-bisphosphoglycerate-dependent phosphoglycerate mutase OS=Actinobaculum massiliense ACS-171-V-Col2 OX=883066 GN=gpmA PE=3 SV=1 - [K9EHA7_9ACTO]	429	13	1	12	71.84	27.8623	5.8335	101	49	26	15	238
F2I5C3	Glyceraldehyde-3-phosphate dehydrogenase OS=Aerococcus urinae (strain ACS-120-V-Col10a) GN=gap PE=3 SV=1 - [F2I5C3_AERUA]	425	9	1	7	31.33	35.7612	5.26221	157	214	54	0	0
Q1RCJ6	Aldehyde-alcohol dehydrogenase OS=Escherichia coli (strain UTI89 / UPEC) GN=adhE PE=3 SV=1 - [Q1RCJ6_ECOUT]	415	29	1	21	42.99	96.0967	6.78564	104	121	31	159	0
F2I5C0	Enolase OS=Aerococcus urinae (strain ACS-120-V-Col10a) GN=eno PE=3 SV=1 - [F2I5C0_AERUA]	414	13	1	13	53.7	46.5934	4.67822	210	193	11	0	0
Q1RGI8	Chaperone protein DnaK OS=Escherichia coli (strain UTI89 / UPEC) GN=dnaK PE=3 SV=1 - [DNAK_ECOUT]	401	31	1	22	63.48	69.0725	4.97021	99	43	52	204	3
B4EXE2	60 kDa chaperonin OS=Proteus mirabilis (strain HI4320) OX=529507 GN=groL PE=3 SV=1 - [CH60_PROMH]	397	21	1	16	52.74	57.6149	4.89404	110	37	129	121	0
B4EYV7	Elongation factor G OS=Proteus mirabilis (strain HI4320) OX=529507 GN=fusA PE=3 SV=1 - [EFG_PROMH]	393	26	1	19	58.95	77.8356	5.18604	106	32	133	122	0
K9F3G6	Pyruvate dehydrogenase E1 component OS=Actinobaculum massiliense ACS-171-V-Col2 OX=883066 GN=HMPREF9233_00088 PE=4 SV=1 - [K9F3G6_9ACTO]	383	29	1	29	49.07	102.313	5.45264	52	14	21	6	290
K9F0D2	Uncharacterized protein OS=Actinobaculum massiliense ACS-171-V-Col2 OX=883066 GN=HMPREF9233_01364 PE=4 SV=1 - [K9F0D2_9ACTO]	383	64	1	64	35.47	318.89	5.0083	51	2	7	1	322
Q834T3	DNA-binding protein HU OS=Enterococcus faecalis (strain ATCC 700802 / V583) GN=hup PE=3 SV=1 - [Q834T3_ENTFA]	382	7	1	7	78.02	9.65022	9.75928	38	68	151	116	9
K9ED17	30S ribosomal protein S1 OS=Actinobaculum massiliense ACS-171-V-Col2 OX=883066 GN=HMPREF9233_01530 PE=4 SV=1 - [K9ED17_9ACTO]	379	21	1	21	58.75	54.8749	4.70361	117	73	46	22	121
K9EE63	Uncharacterized protein OS=Actinobaculum massiliense ACS-171-V-Col2 OX=883066 GN=HMPREF9233_01096 PE=4 SV=1 - [K9EE63_9ACTO]	378	21	1	21	64.79	50.8945	4.81787	87	25	78	29	159
F2I4Z4	Chaperone protein DnaK OS=Aerococcus urinae (strain ACS-120-V-Col10a) GN=dnaK PE=2 SV=1 - [F2I4Z4_AERUA]	373	22	1	17	45.29	65.4219	4.60205	170	105	45	53	0
Q834V5	Glyceraldehyde 3-phosphate dehydrogenase OS=Enterococcus faecalis (strain ATCC 700802 / V583) GN=gap-1 PE=3 SV=1 - [Q834V5_ENTFA]	372	10	1	8	35.42	36.1862	5.03369	59	88	137	88	0
K9EFE0	Uncharacterized protein OS=Actinobaculum massiliense ACS-171-V-Col2 OX=883066 GN=HMPREF9233_01563 PE=4 SV=1 - [K9EFE0_9ACTO]	369	26	1	26	72.47	59.6994	4.69092	145	48	19	16	141
K9EIK4	Chaperone protein DnaK OS=Actinobaculum massiliense ACS-171-V-Col2 OX=883066 GN=dnaK PE=2 SV=1 - [K9EIK4_9ACTO]	363	24	1	24	58.64	65.8075	4.7417	92	27	90	38	116
B4EUH6	Transketolase OS=Proteus mirabilis (strain HI4320) OX=529507 GN=tktA PE=3 SV=1 - [B4EUH6_PROMH]	362	26	1	24	54.07	72.569	5.77002	94	12	161	95	0
K9EG25	Uncharacterized protein OS=Actinobaculum massiliense ACS-171-V-Col2 OX=883066 GN=HMPREF9233_00405 PE=3 SV=1 - [K9EG25_9ACTO]	358	13	1	13	71.2	32.9879	4.70361	35	12	16	2	293
K9EYE9	Lactaldehyde reductase OS=Actinobaculum massiliense ACS-171-V-Col2 OX=883066 GN=HMPREF9233_00095 PE=4 SV=1 - [K9EYE9_9ACTO]	358	14	1	14	73.89	40.3897	4.88135	89	32	0	1	236
Q1REH6	2,3-bisphosphoglycerate-dependent phosphoglycerate mutase OS=Escherichia coli (strain UTI89 / UPEC) GN=gpmA PE=3 SV=1 - [Q1REH6_ECOUT]	357	13	1	9	63.92	29.2041	6.7124	85	62	45	165	0
K9ED12	Xylose isomerase OS=Actinobaculum massiliense ACS-171-V-Col2 OX=883066 GN=xylA PE=3 SV=1 - [K9ED12_9ACTO]	350	19	1	19	58.13	50.5879	4.89404	179	85	61	17	8
K9EG24	DNA-directed RNA polymerase subunit beta' OS=Actinobaculum massiliense ACS-171-V-Col2 OX=883066 GN=rpoC PE=3 SV=1 - [K9EG24_9ACTO]	349	55	1	52	52.88	148.434	5.75732	113	28	18	14	176
B4EVB8	Outer membrane porin OS=Proteus mirabilis (strain HI4320) OX=529507 GN=ompF PE=4 SV=1 - [B4EVB8_PROMH]	346	16	1	16	46.09	40.7958	5.80811	73	19	131	123	0
B4EU10	Putative alkyl hydroperoxide reductase OS=Proteus mirabilis (strain HI4320) OX=529507 GN=ahpC PE=4 SV=1 - [B4EU10_PROMH]	344	13	1	13	83.5	22.2392	5.57959	97	25	141	81	0
F2I4U8	Copper/zinc superoxide dismutase OS=Aerococcus urinae (strain ACS-120-V-Col10a) GN=sodC PE=4 SV=1 - [F2I4U8_AERUA]	344	10	1	10	92.95	16.5419	4.79248	173	171	0	0	0
K9ED31	Triosephosphate isomerase OS=Actinobaculum massiliense ACS-171-V-Col2 OX=883066 GN=tpiA PE=3 SV=1 - [K9ED31_9ACTO]	342	14	1	14	86.1	27.967	4.93213	51	15	12	0	264
B4ETB0	TonB-dependent receptor OS=Proteus mirabilis (strain HI4320) OX=529507 GN=PMI0842 PE=3 SV=1 - [B4ETB0_PROMH]	339	25	1	25	52.42	73.9325	6.37939	122	7	102	108	0
K9EER9	Pyruvate, phosphate dikinase OS=Actinobaculum massiliense ACS-171-V-Col2 OX=883066 GN=HMPREF9233_00939 PE=3 SV=1 - [K9EER9_9ACTO]	339	35	1	35	57.42	99.0074	5.07178	19	6	10	0	304
K9EE14	Acetate kinase OS=Actinobaculum massiliense ACS-171-V-Col2 OX=883066 GN=ackA PE=3 SV=1 - [K9EE14_9ACTO]	338	19	1	19	74.43	42.7548	5.35107	82	19	21	14	202
K9EYN5	Elongation factor Ts OS=Actinobaculum massiliense ACS-171-V-Col2 OX=883066 GN=tsf PE=3 SV=1 - [K9EYN5_9ACTO]	337	18	1	18	74.65	30.3929	5.10986	85	40	20	7	185
F2I7R3	Elongation factor G OS=Aerococcus urinae (strain ACS-120-V-Col10a) GN=fusA PE=3 SV=1 - [F2I7R3_AERUA]	330	26	1	23	59.68	76.8785	4.7417	177	153	0	0	0
K9EZE1	Transketolase OS=Actinobaculum massiliense ACS-171-V-Col2 OX=883066 GN=HMPREF9233_01552 PE=3 SV=1 - [K9EZE1_9ACTO]	326	23	1	23	48.84	74.2924	5.07178	75	49	59	10	133
Q1RBB9	Murein lipoprotein OS=Escherichia coli (strain UTI89 / UPEC) GN=lpp PE=4 SV=1 - [Q1RBB9_ECOUT]	321	3	1	3	48.72	8.3183	9.24658	58	56	45	162	0
Q1R7A7	Phosphoglycerate kinase OS=Escherichia coli (strain UTI89 / UPEC) GN=pgk PE=3 SV=1 - [Q1R7A7_ECOUT]	321	21	1	15	73.28	43.2708	5.38916	100	42	61	118	0
F2I7C0	2-dehydropantoate 2-reductase OS=Aerococcus urinae (strain ACS-120-V-Col10a) GN=HMPREF9243_0432 PE=3 SV=1 - [F2I7C0_AERUA]	320	13	1	13	56.05	34.6345	4.71631	120	200	0	0	0
F2I7V2	60 kDa chaperonin OS=Aerococcus urinae (strain ACS-120-V-Col10a) GN=groL PE=3 SV=1 - [F2I7V2_AERUA]	320	20	1	17	56.27	57.6987	4.70361	172	148	0	0	0
K9F141	Chlorophyll synthesis pathway, bchC OS=Actinobaculum massiliense ACS-171-V-Col2 OX=883066 GN=HMPREF9233_00966 PE=3 SV=1 - [K9F141_9ACTO]	314	13	1	13	55.83	38.6856	4.99561	17	5	2	0	290
Q833J0	Triosephosphate isomerase OS=Enterococcus faecalis (strain ATCC 700802 / V583) GN=tpiA PE=3 SV=1 - [TPIS_ENTFA]	311	9	1	9	63.75	26.8985	4.70361	8	6	218	79	0
K9F278	ATP synthase subunit alpha OS=Actinobaculum massiliense ACS-171-V-Col2 OX=883066 GN=atpA PE=3 SV=1 - [K9F278_9ACTO]	311	22	1	21	55.74	59.0732	4.93213	87	41	16	1	166
Q1REY0	Ferrienterobactin receptor OS=Escherichia coli (strain UTI89 / UPEC) GN=fepA PE=3 SV=1 - [Q1REY0_ECOUT]	309	18	1	18	41.42	82.0114	5.45264	116	73	6	114	0
Q839G9	Elongation factor G OS=Enterococcus faecalis (strain ATCC 700802 / V583) GN=fusA PE=3 SV=1 - [EFG_ENTFA]	307	27	1	25	66.81	76.6305	4.89404	29	21	193	64	0
F2I860	D-lactate dehydrogenase OS=Aerococcus urinae (strain ACS-120-V-Col10a) GN=HMPREF9243_0581 PE=3 SV=1 - [F2I860_AERUA]	305	11	1	11	47.13	37.1194	4.95752	166	139	0	0	0
K9F0X6	Uncharacterized protein OS=Actinobaculum massiliense ACS-171-V-Col2 OX=883066 GN=HMPREF9233_00916 PE=4 SV=1 - [K9F0X6_9ACTO]	305	36	1	36	55.49	115.609	5.49072	42	25	0	0	238
K9EU42	Uncharacterized protein OS=Actinobaculum massiliense ACS-171-V-Col2 OX=883066 GN=HMPREF9233_01424 PE=3 SV=1 - [K9EU42_9ACTO]	303	5	2	4	56.99	9.89231	9.40771	103	57	43	33	67
B4EWA2	Phosphopentomutase OS=Proteus mirabilis (strain HI4320) OX=529507 GN=deoB PE=3 SV=1 - [DEOB_PROMH]	302	14	1	12	46.57	44.5755	5.52881	56	86	104	56	0
Q832Z2	Endocarditis specific antigen OS=Enterococcus faecalis (strain ATCC 700802 / V583) GN=EF_2076 PE=3 SV=1 - [Q832Z2_ENTFA]	301	13	1	13	62.34	34.7747	5.51611	17	19	155	110	0
Q1RAF5	Putative pesticin receptor OS=Escherichia coli (strain UTI89 / UPEC) GN=fyuA PE=3 SV=1 - [Q1RAF5_ECOUT]	297	24	1	24	52.01	73.6272	5.73193	0	0	27	270	0
Q830B0	Acyl carrier protein OS=Enterococcus faecalis (strain ATCC 700802 / V583) GN=acpP PE=3 SV=1 - [Q830B0_ENTFA]	295	2	1	2	40	8.61027	3.82764	49	45	145	56	0
K9F027	50S ribosomal protein L5 OS=Actinobaculum massiliense ACS-171-V-Col2 OX=883066 GN=rplE PE=3 SV=1 - [K9F027_9ACTO]	294	9	1	9	57.46	20.4517	9.31982	53	24	7	7	203
B4F2A1	Malate dehydrogenase OS=Proteus mirabilis (strain HI4320) OX=529507 GN=mdh PE=3 SV=1 - [MDH_PROMH]	289	17	1	12	64.42	32.6705	6.39209	46	15	128	100	0
F2I7Z7	Fructose-1,6-bisphosphate aldolase, class II OS=Aerococcus urinae (strain ACS-120-V-Col10a) GN=fba PE=3 SV=1 - [F2I7Z7_AERUA]	288	13	1	13	65.89	33.2408	5.09717	136	152	0	0	0
K9F002	DNA-directed RNA polymerase subunit beta OS=Actinobaculum massiliense ACS-171-V-Col2 OX=883066 GN=rpoB PE=3 SV=1 - [K9F002_9ACTO]	288	33	1	32	43.58	128.908	4.89404	86	37	25	5	135
K9EFB3	Uncharacterized protein OS=Actinobaculum massiliense ACS-171-V-Col2 OX=883066 GN=HMPREF9233_00676 PE=3 SV=1 - [K9EFB3_9ACTO]	287	14	1	14	69.93	32.7088	5.0083	40	6	3	1	237
Q93EU6	60 kDa chaperonin OS=Enterococcus faecalis (strain ATCC 700802 / V583) GN=groL PE=3 SV=2 - [CH60_ENTFA]	280	23	1	21	52.87	57.0749	4.75439	24	32	90	134	0
F2I6N9	Uncharacterized protein OS=Aerococcus urinae (strain ACS-120-V-Col10a) GN=HMPREF9243_1609 PE=4 SV=1 - [F2I6N9_AERUA]	279	17	1	17	34.66	72.0619	4.7417	153	126	0	0	0
B4EXJ5	Putative siderophore TonB-dependent receptor OS=Proteus mirabilis (strain HI4320) OX=529507 GN=PMI2596 PE=3 SV=1 - [B4EXJ5_PROMH]	279	24	1	24	48.79	74.0115	6.82959	0	0	141	138	0
K9EDJ2	Uncharacterized protein OS=Actinobaculum massiliense ACS-171-V-Col2 OX=883066 GN=HMPREF9233_01065 PE=4 SV=1 - [K9EDJ2_9ACTO]	277	10	1	10	54.18	27.636	4.95752	71	21	14	14	157
K9EJN7	Polyribonucleotide nucleotidyltransferase OS=Actinobaculum massiliense ACS-171-V-Col2 OX=883066 GN=pnp PE=3 SV=1 - [K9EJN7_9ACTO]	274	26	1	26	48.26	89.8629	4.80518	90	18	12	2	152
K9EW93	Amidohydrolase OS=Actinobaculum massiliense ACS-171-V-Col2 OX=883066 GN=HMPREF9233_01018 PE=4 SV=1 - [K9EW93_9ACTO]	274	15	1	15	55.72	43.9551	4.75439	27	14	21	3	209
K9EFJ8	Uronate isomerase OS=Actinobaculum massiliense ACS-171-V-Col2 OX=883066 GN=HMPREF9233_01623 PE=3 SV=1 - [K9EFJ8_9ACTO]	274	17	1	17	50.74	54.1458	5.37646	82	23	79	17	73
Q1RDV5	Formate acetyltransferase 1 OS=Escherichia coli (strain UTI89 / UPEC) GN=pflB PE=4 SV=1 - [Q1RDV5_ECOUT]	269	26	1	19	47.5	85.3027	6.01123	87	46	45	91	0
Q1R7N8	L-fucose isomerase OS=Escherichia coli (strain UTI89 / UPEC) GN=fucI PE=3 SV=1 - [FUCI_ECOUT]	267	20	1	20	50.42	64.948	6.17627	55	84	5	123	0
Q1R5A7	Outer membrane hemin receptor ChuA OS=Escherichia coli (strain UTI89 / UPEC) GN=chuA PE=3 SV=1 - [Q1R5A7_ECOUT]	266	21	1	21	46.06	72.4103	5.33838	92	13	20	141	0
K9EEA1	Ornithine carbamoyltransferase OS=Actinobaculum massiliense ACS-171-V-Col2 OX=883066 GN=HMPREF9233_00351 PE=3 SV=1 - [K9EEA1_9ACTO]	265	10	2	10	44.71	37.1095	5.24951	0	2	0	0	263
F2I5C2	Phosphoglycerate kinase OS=Aerococcus urinae (strain ACS-120-V-Col10a) GN=pgk PE=3 SV=1 - [F2I5C2_AERUA]	261	17	1	15	61.31	42.5858	4.90674	139	108	14	0	0
K9EYD3	Dihydrolipoamide acetyltransferase component of pyruvate dehydrogenase complex OS=Actinobaculum massiliense ACS-171-V-Col2 OX=883066 GN=HMPREF9233_00070 PE=3 SV=1 - [K9EYD3_9ACTO]	261	13	1	13	30.5	59.6405	4.61475	29	2	27	9	194
K9EE92	Transaldolase OS=Actinobaculum massiliense ACS-171-V-Col2 OX=883066 GN=tal PE=3 SV=1 - [K9EE92_9ACTO]	261	18	1	18	75.54	40.1464	4.65283	66	22	40	14	119
Q1R5U3	Elongation factor G OS=Escherichia coli (strain UTI89 / UPEC) GN=fusA PE=3 SV=3 - [EFG_ECOUT]	259	25	1	19	54.4	77.5325	5.37646	66	23	36	134	0
B4ETJ9	Iron ABC transporter, periplasmic substrate-binding protein OS=Proteus mirabilis (strain HI4320) OX=529507 GN=sitA PE=3 SV=1 - [B4ETJ9_PROMH]	258	12	1	12	69.54	33.7405	5.92236	47	14	86	111	0
P37062	NADH peroxidase OS=Enterococcus faecalis (strain ATCC 700802 / V583) GN=npr PE=1 SV=2 - [NAPE_ENTFA]	256	14	1	14	48.1	49.5344	4.93213	13	25	121	97	0
B4EXR9	Aldehyde-alcohol dehydrogenase OS=Proteus mirabilis (strain HI4320) OX=529507 GN=adhE PE=3 SV=1 - [B4EXR9_PROMH]	255	26	1	18	40.02	96.2175	6.37939	54	43	68	90	0
K9EDR2	30S ribosomal protein S7 OS=Actinobaculum massiliense ACS-171-V-Col2 OX=883066 GN=rpsG PE=3 SV=1 - [K9EDR2_9ACTO]	253	6	1	6	60.9	17.5134	10.0815	67	57	33	6	90
F2I4S7	Glutamate dehydrogenase OS=Aerococcus urinae (strain ACS-120-V-Col10a) GN=HMPREF9243_1053 PE=3 SV=1 - [F2I4S7_AERUA]	251	15	1	12	42.86	49.2228	5.09717	147	98	0	6	0
F2I5P7	Branched-chain-amino-acid aminotransferase OS=Aerococcus urinae (strain ACS-120-V-Col10a) GN=ilvE PE=3 SV=1 - [F2I5P7_AERUA]	250	12	1	12	51.17	37.906	5.16064	160	90	0	0	0
B4ETD0	Acyl carrier protein OS=Proteus mirabilis (strain HI4320) OX=529507 GN=acpP PE=3 SV=1 - [ACP_PROMH]	249	3	1	3	33.33	8.61027	4.00537	66	27	110	46	0
B4EST0	2,3-bisphosphoglycerate-dependent phosphoglycerate mutase OS=Proteus mirabilis (strain HI4320) OX=529507 GN=gpmA PE=3 SV=1 - [GPMA_PROMH]	249	12	1	8	66.8	28.3767	5.59229	44	27	99	79	0
B4F1I0	Elongation factor Tu OS=Proteus mirabilis (strain HI4320) OX=529507 GN=tufB PE=3 SV=1 - [B4F1I0_PROMH]	249	16	1	1	53.3	43.1691	5.21143	180	69	0	0	0
K9EJG0	Dihydrolipoyl dehydrogenase OS=Actinobaculum massiliense ACS-171-V-Col2 OX=883066 GN=HMPREF9233_00069 PE=3 SV=1 - [K9EJG0_9ACTO]	249	23	1	23	68.42	49.1484	5.84619	35	6	34	0	174
K9EB79	50S ribosomal protein L27 OS=Actinobaculum massiliense ACS-171-V-Col2 OX=883066 GN=rpmA PE=3 SV=1 - [K9EB79_9ACTO]	249	3	1	3	37.35	8.92172	11.2241	20	9	26	9	185
Q1R530	Xylose isomerase OS=Escherichia coli (strain UTI89 / UPEC) GN=xylA PE=3 SV=1 - [Q1R530_ECOUT]	248	18	1	14	59.01	50.2087	6.01123	50	0	1	197	0
B4EU27	D-ribose ABC transporter, substrate-binding periplasmic protein OS=Proteus mirabilis (strain HI4320) OX=529507 GN=rbsB PE=4 SV=1 - [B4EU27_PROMH]	247	14	1	14	66.89	31.2166	6.62451	27	16	143	61	0
F2I5Y6	Probable transaldolase OS=Aerococcus urinae (strain ACS-120-V-Col10a) GN=fsa PE=3 SV=1 - [F2I5Y6_AERUA]	247	11	1	11	73.95	23.4211	5.04639	153	94	0	0	0
K9EW19	Uncharacterized protein OS=Actinobaculum massiliense ACS-171-V-Col2 OX=883066 GN=HMPREF9233_00948 PE=4 SV=1 - [K9EW19_9ACTO]	245	19	1	19	61.98	48.9007	8.85107	14	2	0	0	229
K9EGP7	Fructose-bisphosphate aldolase, class II OS=Actinobaculum massiliense ACS-171-V-Col2 OX=883066 GN=HMPREF9233_00837 PE=3 SV=1 - [K9EGP7_9ACTO]	244	11	1	11	45.13	36.7465	5.16064	53	27	6	4	154
K9EHH9	30S ribosomal protein S2 OS=Actinobaculum massiliense ACS-171-V-Col2 OX=883066 GN=rpsB PE=3 SV=1 - [K9EHH9_9ACTO]	243	12	1	12	50.86	32.1134	4.90674	52	46	22	5	118
B4F0E7	ATP synthase subunit beta OS=Proteus mirabilis (strain HI4320) OX=529507 GN=atpD PE=3 SV=1 - [ATPB_PROMH]	236	21	1	9	68.7	50.1989	5.07178	60	15	64	97	0
B4EYA6	Fructose-bisphosphate aldolase class I OS=Proteus mirabilis (strain HI4320) OX=529507 GN=fbaB PE=4 SV=1 - [B4EYA6_PROMH]	235	15	1	11	65.33	37.8401	6.80029	49	9	118	59	0
B4F2V2	Transaldolase OS=Proteus mirabilis (strain HI4320) OX=529507 GN=tal PE=3 SV=1 - [TAL_PROMH]	226	19	1	12	77.6	35.3422	5.21143	53	22	65	86	0
K9EVJ0	50S ribosomal protein L25 OS=Actinobaculum massiliense ACS-171-V-Col2 OX=883066 GN=rplY PE=3 SV=1 - [K9EVJ0_9ACTO]	223	6	1	6	52.31	23.409	4.50049	51	34	20	12	106
K9F393	Uncharacterized protein OS=Actinobaculum massiliense ACS-171-V-Col2 OX=883066 GN=HMPREF9233_00677 PE=4 SV=1 - [K9F393_9ACTO]	221	12	1	12	64.34	31.1014	7.25439	51	13	3	0	154
F2I5S2	NADH oxidase OS=Aerococcus urinae (strain ACS-120-V-Col10a) GN=noxE PE=4 SV=1 - [F2I5S2_AERUA]	220	13	1	13	48.77	49.0235	4.77979	127	92	1	0	0
K9EI91	3-dehydroquinate dehydratase OS=Actinobaculum massiliense ACS-171-V-Col2 OX=883066 GN=aroD PE=3 SV=1 - [K9EI91_9ACTO]	220	11	1	11	66.29	29.1842	5.49072	44	38	6	5	127
B4EWY9	Glycerophosphoryl diester phosphodiesterase OS=Proteus mirabilis (strain HI4320) OX=529507 GN=glpQ PE=4 SV=1 - [B4EWY9_PROMH]	219	17	1	14	67.41	40.7836	5.61768	20	15	130	54	0
K9EVW6	Uncharacterized protein OS=Actinobaculum massiliense ACS-171-V-Col2 OX=883066 GN=HMPREF9233_00893 PE=3 SV=1 - [K9EVW6_9ACTO]	214	27	1	26	47.81	95.5147	5.32568	65	0	10	17	122
B4EZW8	Putative iron ABC transporter, substrate-binding protein OS=Proteus mirabilis (strain HI4320) OX=529507 GN=PMI2957 PE=4 SV=1 - [B4EZW8_PROMH]	212	12	1	12	46.08	34.995	5.22412	63	13	53	83	0
F2I8L1	Dipeptidase PepV OS=Aerococcus urinae (strain ACS-120-V-Col10a) GN=HMPREF9243_0675 PE=4 SV=1 - [F2I8L1_AERUA]	212	11	1	11	32.61	51.1014	4.65283	130	82	0	0	0
F2I6N2	Transketolase, pyridine binding domain protein OS=Aerococcus urinae (strain ACS-120-V-Col10a) GN=HMPREF9243_1602 PE=4 SV=1 - [F2I6N2_AERUA]	211	11	1	11	46.04	36.1662	4.85596	118	93	0	0	0
B4EUX6	Chaperone protein ClpB OS=Proteus mirabilis (strain HI4320) OX=529507 GN=clpB PE=3 SV=1 - [B4EUX6_PROMH]	207	23	1	16	39.86	95.5089	5.70654	48	12	75	67	5
K9EG34	Uncharacterized protein OS=Actinobaculum massiliense ACS-171-V-Col2 OX=883066 GN=HMPREF9233_00415 PE=4 SV=1 - [K9EG34_9ACTO]	207	4	1	4	47.9	18.1368	9.45166	22	1	3	1	180
K9EVH9	Uncharacterized protein OS=Actinobaculum massiliense ACS-171-V-Col2 OX=883066 GN=HMPREF9233_01115 PE=4 SV=1 - [K9EVH9_9ACTO]	207	8	1	8	71.88	21.5779	5.43994	72	37	34	4	60
B4F0E5	ATP synthase subunit alpha OS=Proteus mirabilis (strain HI4320) OX=529507 GN=atpA PE=3 SV=1 - [ATPA_PROMH]	206	18	1	8	47.56	55.5019	5.69385	39	4	45	118	0
B4EUH8	Phosphoglycerate kinase OS=Proteus mirabilis (strain HI4320) OX=529507 GN=pgk PE=3 SV=1 - [PGK_PROMH]	206	18	1	11	60.21	41.1966	5.13525	67	21	61	57	0
Q834N1	Formate acetyltransferase OS=Enterococcus faecalis (strain ATCC 700802 / V583) GN=pflB PE=4 SV=1 - [Q834N1_ENTFA]	205	25	1	25	46.66	84.5351	5.51611	4	20	138	36	7
Q831Y7	Chaperone protein ClpB OS=Enterococcus faecalis (strain ATCC 700802 / V583) GN=clpB PE=3 SV=1 - [CLPB_ENTFA]	202	28	1	24	44.35	98.01	5.14795	11	12	144	30	5
B4F0Y8	Pyruvate dehydrogenase E1 component OS=Proteus mirabilis (strain HI4320) OX=529507 GN=aceE PE=4 SV=1 - [B4F0Y8_PROMH]	201	22	1	16	30.52	100.194	5.56689	53	29	49	70	0
F2I6Q3	ABC transporter, substrate-binding protein, family 5 OS=Aerococcus urinae (strain ACS-120-V-Col10a) GN=HMPREF9243_1626 PE=4 SV=1 - [F2I6Q3_AERUA]	201	16	1	13	42.99	60.8258	4.60205	90	111	0	0	0
K9EDN9	Rib/alpha/Esp surface antigen (Fragment) OS=Actinobaculum massiliense ACS-171-V-Col2 OX=883066 GN=HMPREF9233_00827 PE=4 SV=1 - [K9EDN9_9ACTO]	200	7	1	7	41.54	33.536	4.29736	40	9	20	58	73
Q1RCU3	Putative iron transport protein, periplasmic-binding protein SitA OS=Escherichia coli (strain UTI89 / UPEC) GN=sitA PE=3 SV=1 - [Q1RCU3_ECOUT]	198	12	1	12	61.18	33.4054	8.44092	79	40	12	67	0
F2I5R5	30S ribosomal protein S4 OS=Aerococcus urinae (strain ACS-120-V-Col10a) GN=rpsD PE=3 SV=1 - [F2I5R5_AERUA]	198	9	1	9	52.71	23.3631	9.48096	110	88	0	0	0
B4EVY7	Fumarate hydratase class II OS=Proteus mirabilis (strain HI4320) OX=529507 GN=fumC PE=3 SV=1 - [B4EVY7_PROMH]	195	12	1	12	44.95	50.3869	6.58057	42	7	79	67	0
B4EWL9	Outer membrane lipoprotein OS=Proteus mirabilis (strain HI4320) OX=529507 GN=slyB PE=4 SV=1 - [B4EWL9_PROMH]	194	3	1	3	35.48	15.4621	9.78857	46	2	66	80	0
K9F048	DNA-directed RNA polymerase subunit alpha OS=Actinobaculum massiliense ACS-171-V-Col2 OX=883066 GN=rpoA PE=3 SV=1 - [K9F048_9ACTO]	194	12	1	12	54.1	36.0798	4.729	60	24	29	7	74
K9EUR7	dTDP-glucose 4,6-dehydratase OS=Actinobaculum massiliense ACS-171-V-Col2 OX=883066 GN=HMPREF9233_01206 PE=3 SV=1 - [K9EUR7_9ACTO]	192	13	1	13	56.67	36.9285	5.36377	36	16	42	1	97
B4EUH9	Fructose-bisphosphate aldolase class II OS=Proteus mirabilis (strain HI4320) OX=529507 GN=fbaA PE=3 SV=1 - [B4EUH9_PROMH]	191	13	1	11	51.25	39.2537	5.78271	37	24	96	34	0
B4F166	Glycerol kinase OS=Proteus mirabilis (strain HI4320) OX=529507 GN=glpK PE=3 SV=1 - [B4F166_PROMH]	191	17	1	14	39.41	56.6815	5.70654	64	27	67	33	0
K9EDU0	Uncharacterized protein OS=Actinobaculum massiliense ACS-171-V-Col2 OX=883066 GN=HMPREF9233_00734 PE=4 SV=1 - [K9EDU0_9ACTO]	191	12	1	12	56.46	33.0757	4.85596	59	26	27	2	77
Q835G1	Glucose-6-phosphate isomerase OS=Enterococcus faecalis (strain ATCC 700802 / V583) GN=pgi PE=3 SV=1 - [G6PI_ENTFA]	190	19	1	18	63.25	49.7031	5.07178	24	16	129	21	0
B4EYU9	DNA-directed RNA polymerase subunit beta OS=Proteus mirabilis (strain HI4320) OX=529507 GN=rpoB PE=3 SV=1 - [RPOB_PROMH]	190	30	1	18	29.36	150.186	5.22412	87	14	58	31	0
B4ET27	30S ribosomal protein S1 OS=Proteus mirabilis (strain HI4320) OX=529507 GN=rpsA PE=3 SV=1 - [B4ET27_PROMH]	190	15	1	4	35.37	61.2648	5.04639	68	13	56	53	0
K9EFJ3	Peptidyl-prolyl cis-trans isomerase OS=Actinobaculum massiliense ACS-171-V-Col2 OX=883066 GN=HMPREF9233_00748 PE=3 SV=1 - [K9EFJ3_9ACTO]	190	5	1	5	51.45	18.6251	4.55127	30	4	28	2	126
K9F2H7	Uncharacterized protein OS=Actinobaculum massiliense ACS-171-V-Col2 OX=883066 GN=HMPREF9233_00462 PE=4 SV=1 - [K9F2H7_9ACTO]	188	14	1	14	24.4	89.7905	6.59521	27	9	30	14	108
Q1RGJ5	Transaldolase OS=Escherichia coli (strain UTI89 / UPEC) GN=talB PE=3 SV=1 - [Q1RGJ5_ECOUT]	187	19	1	11	69.82	37.4475	5.40186	43	27	33	84	0
K9EDT9	50S ribosomal protein L6 OS=Actinobaculum massiliense ACS-171-V-Col2 OX=883066 GN=rplF PE=3 SV=1 - [K9EDT9_9ACTO]	186	7	1	7	48.88	19.1383	9.37842	37	6	9	0	134
F2I4J9	Universal stress protein OS=Aerococcus urinae (strain ACS-120-V-Col10a) GN=HMPREF9243_0958 PE=3 SV=1 - [F2I4J9_AERUA]	184	7	1	7	66.46	17.6352	5.61768	84	100	0	0	0
F2I4L3	Uncharacterized protein OS=Aerococcus urinae (strain ACS-120-V-Col10a) GN=HMPREF9243_0975 PE=4 SV=1 - [F2I4L3_AERUA]	183	3	1	3	20.29	36.7434	4.15771	142	41	0	0	0
K9EC42	30S ribosomal protein S3 OS=Actinobaculum massiliense ACS-171-V-Col2 OX=883066 GN=rpsC PE=3 SV=1 - [K9EC42_9ACTO]	183	8	1	8	36.86	30.446	10.6821	40	21	10	1	111
K9ECD1	Phosphate acetyltransferase OS=Actinobaculum massiliense ACS-171-V-Col2 OX=883066 GN=HMPREF9233_01338 PE=4 SV=1 - [K9ECD1_9ACTO]	182	18	1	18	51.02	56.746	4.75439	55	13	16	0	98
B4F1P5	Protein UshA [includes: UDP-sugar hydrolase and 5'-nucleotidase] OS=Proteus mirabilis (strain HI4320) OX=529507 GN=ushA PE=3 SV=1 - [B4F1P5_PROMH]	181	17	1	17	42.96	61.4465	5.52881	25	14	101	41	0
Q1R3B6	60 kDa chaperonin OS=Escherichia coli (strain UTI89 / UPEC) GN=groL PE=1 SV=1 - [CH60_ECOUT]	179	18	1	13	48.91	57.2927	4.94482	58	19	0	102	0
Q838A2	Xaa-his dipeptidase OS=Enterococcus faecalis (strain ATCC 700802 / V583) GN=EF_0671 PE=4 SV=1 - [Q838A2_ENTFA]	179	15	1	15	51.59	51.3781	4.69092	14	8	140	17	0
K9EGM7	Oligopeptide/dipeptide ABC transporter, ATP-binding protein domain OS=Actinobaculum massiliense ACS-171-V-Col2 OX=883066 GN=HMPREF9233_01184 PE=3 SV=1 - [K9EGM7_9ACTO]	176	21	3	20	47.44	68.408	6.04932	58	28	8	3	79
Q834S3	Uncharacterized protein OS=Enterococcus faecalis (strain ATCC 700802 / V583) GN=EF_1560 PE=4 SV=1 - [Q834S3_ENTFA]	175	10	1	10	75.5	17.6848	5.13525	18	13	88	56	0
Q1R6N8	Uronate isomerase OS=Escherichia coli (strain UTI89 / UPEC) GN=uxaC PE=3 SV=1 - [Q1R6N8_ECOUT]	175	23	1	23	63.14	56.2859	6.13818	0	0	12	163	0
K9EC56	Adenylate kinase OS=Actinobaculum massiliense ACS-171-V-Col2 OX=883066 GN=adk PE=3 SV=1 - [K9EC56_9ACTO]	174	11	1	11	69.07	20.8987	4.66553	58	16	35	1	64
Q1RC62	Phage shock protein A OS=Escherichia coli (strain UTI89 / UPEC) GN=pspA PE=4 SV=1 - [Q1RC62_ECOUT]	172	11	1	10	53.6	25.5053	5.49072	45	6	9	112	0
Q830U6	Oligoendopeptidase F,plasmid OS=Enterococcus faecalis (strain ATCC 700802 / V583) GN=pepF PE=3 SV=1 - [Q830U6_ENTFA]	172	19	1	19	38.47	68.8053	5.03369	7	3	133	29	0
K9EYC7	Uncharacterized protein OS=Actinobaculum massiliense ACS-171-V-Col2 OX=883066 GN=HMPREF9233_00060 PE=4 SV=1 - [K9EYC7_9ACTO]	171	16	1	16	53.54	46.5075	5.51611	53	18	15	1	84
K9EEX7	Uncharacterized protein OS=Actinobaculum massiliense ACS-171-V-Col2 OX=883066 GN=HMPREF9233_00989 PE=4 SV=1 - [K9EEX7_9ACTO]	171	12	1	12	70.22	24.9421	5.8335	48	19	20	3	81
Q1R8D3	Chaperone protein ClpB OS=Escherichia coli (strain UTI89 / UPEC) GN=clpB PE=3 SV=1 - [Q1R8D3_ECOUT]	169	19	1	12	33.68	95.8981	5.51611	42	10	26	86	5
K9EDX8	10 kDa chaperonin OS=Actinobaculum massiliense ACS-171-V-Col2 OX=883066 GN=groS PE=3 SV=1 - [K9EDX8_9ACTO]	169	6	1	6	81.63	10.5685	4.75439	34	16	18	22	79
F2I6N1	Dihydrolipoamide acetyltransferase component of pyruvate dehydrogenase complex OS=Aerococcus urinae (strain ACS-120-V-Col10a) GN=HMPREF9243_1601 PE=3 SV=1 - [F2I6N1_AERUA]	167	13	1	13	33.09	57.4226	4.58936	60	107	0	0	0
F2I7V3	10 kDa chaperonin OS=Aerococcus urinae (strain ACS-120-V-Col10a) GN=groS PE=3 SV=1 - [F2I7V3_AERUA]	167	5	1	5	73.03	9.90118	4.51318	78	89	0	0	0
F2I4S5	Pyridoxamine 5'-phosphate oxidase family protein OS=Aerococcus urinae (strain ACS-120-V-Col10a) GN=HMPREF9243_1051 PE=4 SV=1 - [F2I4S5_AERUA]	167	6	2	6	63.57	15.8427	4.70361	95	72	0	0	0
B4ET41	Class B acid phosphatase OS=Proteus mirabilis (strain HI4320) OX=529507 GN=aphA PE=3 SV=1 - [APHA_PROMH]	166	9	1	9	35.86	26.4014	5.92236	47	38	51	30	0
K9F147	Probable D-serine dehydratase OS=Actinobaculum massiliense ACS-171-V-Col2 OX=883066 GN=dsdA PE=3 SV=1 - [K9F147_9ACTO]	166	11	1	11	38.67	49.1655	5.14795	49	21	41	16	39
K9EZ77	Uncharacterized protein OS=Actinobaculum massiliense ACS-171-V-Col2 OX=883066 GN=HMPREF9233_01482 PE=4 SV=1 - [K9EZ77_9ACTO]	166	17	1	17	50.67	48.9174	5.69385	35	21	7	3	100
Q839I2	Phosphopentomutase OS=Enterococcus faecalis (strain ATCC 700802 / V583) GN=deoB PE=3 SV=1 - [DEOB_ENTFA]	165	12	1	12	41.24	42.7725	5.07178	1	4	141	19	0
Q82ZX2	Cold-shock domain family protein OS=Enterococcus faecalis (strain ATCC 700802 / V583) GN=EF_2925 PE=4 SV=1 - [Q82ZX2_ENTFA]	164	5	1	5	69.7	7.29545	4.48779	5	3	99	57	0
K9EJS4	30S ribosomal protein S16 OS=Actinobaculum massiliense ACS-171-V-Col2 OX=883066 GN=rpsP PE=3 SV=1 - [K9EJS4_9ACTO]	164	4	1	4	30.36	18.6866	5.8208	35	9	16	1	103
Q836R2	Pyruvate kinase OS=Enterococcus faecalis (strain ATCC 700802 / V583) GN=pyk PE=3 SV=1 - [Q836R2_ENTFA]	164	19	1	19	41.03	62.4774	5.09717	0	4	102	58	0
F2I692	Transketolase, pyridine binding domain protein OS=Aerococcus urinae (strain ACS-120-V-Col10a) GN=HMPREF9243_1526 PE=4 SV=1 - [F2I692_AERUA]	163	11	1	11	46.94	37.0166	4.56396	105	58	0	0	0
K9EFR5	Cysteine synthase OS=Actinobaculum massiliense ACS-171-V-Col2 OX=883066 GN=HMPREF9233_00265 PE=3 SV=1 - [K9EFR5_9ACTO]	162	14	1	14	60.13	32.594	5.21143	2	0	6	0	154
Q1R7A8	Fructose-bisphosphate aldolase class II OS=Escherichia coli (strain UTI89 / UPEC) GN=fba PE=3 SV=1 - [Q1R7A8_ECOUT]	160	12	1	10	44.96	42.6844	6.354	33	33	27	67	0
K9EJB3	Glucosamine-6-phosphate deaminase OS=Actinobaculum massiliense ACS-171-V-Col2 OX=883066 GN=HMPREF9233_00683 PE=3 SV=1 - [K9EJB3_9ACTO]	160	10	1	10	67.83	27.4789	4.90674	36	11	14	1	98
K9EUJ0	Aspartate--tRNA(Asp/Asn) ligase OS=Actinobaculum massiliense ACS-171-V-Col2 OX=883066 GN=aspS PE=3 SV=1 - [K9EUJ0_9ACTO]	158	14	1	14	35.5	67.9694	5.26221	33	20	20	0	85
B4EYU8	DNA-directed RNA polymerase subunit beta' OS=Proteus mirabilis (strain HI4320) OX=529507 GN=rpoC PE=3 SV=1 - [B4EYU8_PROMH]	157	27	1	16	24.77	155.298	6.56592	48	26	46	37	0
K9EZI4	Elongation factor P OS=Actinobaculum massiliense ACS-171-V-Col2 OX=883066 GN=efp PE=3 SV=1 - [K9EZI4_9ACTO]	157	7	1	7	64.71	20.7385	5.26221	39	7	22	2	87
K9EF70	Phosphoglucomutase, alpha-D-glucose phosphate-specific OS=Actinobaculum massiliense ACS-171-V-Col2 OX=883066 GN=HMPREF9233_00646 PE=3 SV=1 - [K9EF70_9ACTO]	157	19	1	19	54.3	59.6797	4.7417	17	3	29	4	104
K9EC02	Ribosome hibernation promoting factor OS=Actinobaculum massiliense ACS-171-V-Col2 OX=883066 GN=hpf PE=3 SV=1 - [K9EC02_9ACTO]	156	8	1	8	48.6	24.2364	5.68115	15	0	1	3	137
F2I5E7	Glucose-6-phosphate isomerase OS=Aerococcus urinae (strain ACS-120-V-Col10a) GN=pgi PE=3 SV=1 - [F2I5E7_AERUA]	155	17	1	16	52.78	50.2382	4.99561	103	52	0	0	0
K9F3N2	Uncharacterized protein OS=Actinobaculum massiliense ACS-171-V-Col2 OX=883066 GN=HMPREF9233_00173 PE=4 SV=1 - [K9F3N2_9ACTO]	155	8	1	8	55.47	26.5917	4.80518	6	0	4	0	145
B4EWN5	Pyruvate kinase OS=Proteus mirabilis (strain HI4320) OX=529507 GN=pykF PE=3 SV=1 - [B4EWN5_PROMH]	154	15	1	11	46.38	50.5602	6.01123	65	22	30	37	0
B4EW24	Superoxide dismutase [Cu-Zn] OS=Proteus mirabilis (strain HI4320) OX=529507 GN=sodC PE=3 SV=1 - [B4EW24_PROMH]	154	7	1	7	60.92	17.9033	6.18896	5	1	108	40	0
B4F2Y1	2',3'-cyclic-nucleotide 2'-phosphodiesterase OS=Proteus mirabilis (strain HI4320) OX=529507 GN=cpdB PE=3 SV=1 - [B4F2Y1_PROMH]	154	21	1	21	48.23	71.5102	5.80811	16	8	102	28	0
P23530	Phosphoenolpyruvate-protein phosphotransferase OS=Enterococcus faecalis (strain ATCC 700802 / V583) GN=ptsI PE=1 SV=2 - [PT1_ENTFA]	153	21	1	21	49.91	63.1378	4.80518	3	4	107	39	0
Q834B6	Uncharacterized protein OS=Enterococcus faecalis (strain ATCC 700802 / V583) GN=EF_1753 PE=4 SV=1 - [Q834B6_ENTFA]	152	17	1	17	40.15	59.5585	4.77979	13	28	79	32	0
F2I5W4	V-type ATP synthase alpha chain OS=Aerococcus urinae (strain ACS-120-V-Col10a) GN=atpA PE=3 SV=1 - [F2I5W4_AERUA]	152	17	1	15	42.83	65.5028	4.81787	110	37	0	5	0
F2I5A3	Alanine dehydrogenase OS=Aerococcus urinae (strain ACS-120-V-Col10a) GN=ald PE=3 SV=1 - [F2I5A3_AERUA]	152	12	1	12	44.96	39.373	4.94482	74	78	0	0	0
B4EUR3	Putative ABC transporter, substrate-binding protein OS=Proteus mirabilis (strain HI4320) OX=529507 GN=PMI0331 PE=4 SV=1 - [B4EUR3_PROMH]	150	8	1	8	33.54	34.0491	5.79541	24	16	80	30	0
F2I5V4	Phosphoenolpyruvate-protein phosphotransferase OS=Aerococcus urinae (strain ACS-120-V-Col10a) GN=ptsP PE=3 SV=1 - [F2I5V4_AERUA]	150	16	1	16	33.45	63.6621	4.70361	58	92	0	0	0
F2I5H5	Pyruvate kinase OS=Aerococcus urinae (strain ACS-120-V-Col10a) GN=pyk PE=3 SV=1 - [F2I5H5_AERUA]	150	14	1	14	38.99	64.3943	5.10986	85	65	0	0	0
F2I844	L-2-hydroxyisocaproate dehydrogenase OS=Aerococcus urinae (strain ACS-120-V-Col10a) GN=HMPREF9243_0564 PE=3 SV=1 - [F2I844_AERUA]	150	12	1	12	52.29	33.244	5.24951	64	86	0	0	0
B4EXL6	Periplasmic serine endoprotease DegP-like OS=Proteus mirabilis (strain HI4320) OX=529507 GN=degQ PE=3 SV=1 - [B4EXL6_PROMH]	149	17	1	14	58.32	48.5859	9.02686	48	1	64	36	0
F2I516	30S ribosomal protein S2 OS=Aerococcus urinae (strain ACS-120-V-Col10a) GN=rpsB PE=3 SV=1 - [F2I516_AERUA]	148	10	1	9	54.79	29.4957	4.60205	85	61	2	0	0
F2I479	Uncharacterized protein OS=Aerococcus urinae (strain ACS-120-V-Col10a) GN=HMPREF9243_0816 PE=4 SV=1 - [F2I479_AERUA]	148	5	1	5	37.8	17.7559	4.98291	58	90	0	0	0
K9EFB0	Uncharacterized protein OS=Actinobaculum massiliense ACS-171-V-Col2 OX=883066 GN=HMPREF9233_00671 PE=4 SV=1 - [K9EFB0_9ACTO]	148	11	1	11	48.39	49.7984	4.64014	56	39	0	0	53
F2I5Y5	Transketolase OS=Aerococcus urinae (strain ACS-120-V-Col10a) GN=tkt PE=3 SV=1 - [F2I5Y5_AERUA]	147	10	1	10	22.41	72.3261	4.85596	79	63	5	0	0
F2I5C1	Triosephosphate isomerase OS=Aerococcus urinae (strain ACS-120-V-Col10a) GN=tpiA PE=3 SV=1 - [F2I5C1_AERUA]	147	8	1	8	50.6	26.9486	4.60205	90	57	0	0	0
K9EUX4	50S ribosomal protein L10 OS=Actinobaculum massiliense ACS-171-V-Col2 OX=883066 GN=rplJ PE=3 SV=1 - [K9EUX4_9ACTO]	147	7	1	7	61.49	18.6298	6.04932	52	12	25	6	52
B4F0A2	Putative TonB-dependent ferric siderophore receptor OS=Proteus mirabilis (strain HI4320) OX=529507 GN=ireA PE=3 SV=1 - [B4F0A2_PROMH]	146	17	1	17	36.67	75.5046	6.58057	54	14	43	35	0
B4ESX1	DNA protection during starvation protein OS=Proteus mirabilis (strain HI4320) OX=529507 GN=dps PE=3 SV=1 - [B4ESX1_PROMH]	146	7	1	7	63.69	19.0747	5.26221	56	20	27	43	0
B4EYV2	50S ribosomal protein L1 OS=Proteus mirabilis (strain HI4320) OX=529507 GN=rplA PE=3 SV=1 - [RL1_PROMH]	145	10	1	6	53.22	24.5712	9.5835	53	25	29	38	0
F2I452	GMP synthase [glutamine-hydrolyzing] OS=Aerococcus urinae (strain ACS-120-V-Col10a) GN=guaA PE=3 SV=1 - [F2I452_AERUA]	145	15	1	11	40.5	57.3702	4.97021	87	58	0	0	0
F2I6N3	Pyruvate dehydrogenase E1 component, alpha subunit OS=Aerococcus urinae (strain ACS-120-V-Col10a) GN=pdhA PE=4 SV=1 - [F2I6N3_AERUA]	144	8	1	8	32.15	40.8782	5.13525	85	59	0	0	0
K9EC92	Inosine-5'-monophosphate dehydrogenase OS=Actinobaculum massiliense ACS-171-V-Col2 OX=883066 GN=guaB PE=3 SV=1 - [K9EC92_9ACTO]	144	19	1	18	53.78	53.3195	5.50342	43	18	19	5	59
Q1R4K0	ATP synthase subunit alpha OS=Escherichia coli (strain UTI89 / UPEC) GN=atpA PE=3 SV=1 - [ATPA_ECOUT]	143	18	1	9	46	55.1878	6.12549	31	4	16	92	0
B4F057	Autonomous glycyl radical cofactor OS=Proteus mirabilis (strain HI4320) OX=529507 GN=grcA PE=3 SV=1 - [GRCA_PROMH]	143	9	1	8	76.38	14.3252	4.90674	19	9	49	66	0
B4EVJ7	Putative heat shock protein OS=Proteus mirabilis (strain HI4320) OX=529507 GN=PMI0973 PE=3 SV=1 - [B4EVJ7_PROMH]	142	7	1	7	67.76	17.3339	5.021	2	0	21	119	0
F2I5W3	V-type ATP synthase beta chain OS=Aerococcus urinae (strain ACS-120-V-Col10a) GN=atpB PE=3 SV=1 - [F2I5W3_AERUA]	142	17	1	17	54.7	53.3117	4.729	86	56	0	0	0
K9EFL7	DivIVA domain-containing protein OS=Actinobaculum massiliense ACS-171-V-Col2 OX=883066 GN=HMPREF9233_00132 PE=4 SV=1 - [K9EFL7_9ACTO]	142	5	1	5	41.03	21.3386	4.52588	24	19	20	10	69
K9EJA9	Oligopeptide/dipeptide ABC transporter, ATP-binding protein domain OS=Actinobaculum massiliense ACS-171-V-Col2 OX=883066 GN=HMPREF9233_00678 PE=3 SV=1 - [K9EJA9_9ACTO]	142	15	1	15	28.71	75.8656	5.37646	38	5	1	0	98
F2I7S9	50S ribosomal protein L5 OS=Aerococcus urinae (strain ACS-120-V-Col10a) GN=rplE PE=3 SV=1 - [F2I7S9_AERUA]	141	7	1	7	44.44	20.3498	9.0415	74	67	0	0	0
F2I568	Trigger factor OS=Aerococcus urinae (strain ACS-120-V-Col10a) GN=tig PE=3 SV=1 - [F2I568_AERUA]	141	17	1	17	57.51	47.8045	4.4751	84	57	0	0	0
K9EBI6	Uncharacterized protein OS=Actinobaculum massiliense ACS-171-V-Col2 OX=883066 GN=HMPREF9233_01576 PE=4 SV=1 - [K9EBI6_9ACTO]	141	6	1	6	61.07	16.1112	5.99854	45	37	31	4	24
Q833H0	Acetate kinase OS=Enterococcus faecalis (strain ATCC 700802 / V583) GN=ackA PE=3 SV=1 - [ACKA_ENTFA]	141	14	1	14	49.37	43.3802	5.10986	0	1	126	14	0
K9EG36	50S ribosomal protein L2 OS=Actinobaculum massiliense ACS-171-V-Col2 OX=883066 GN=rplB PE=3 SV=1 - [K9EG36_9ACTO]	140	8	1	8	44.6	30.5895	11.3853	46	18	12	9	55
Q1REV6	Alkyl hydroperoxide reductase, C22 subunit detoxification of hydroperoxides OS=Escherichia coli (strain UTI89 / UPEC) GN=ahpC PE=4 SV=1 - [Q1REV6_ECOUT]	139	9	1	8	63.64	20.7484	5.17334	57	30	7	45	0
B4EZR5	Cysteine synthase OS=Proteus mirabilis (strain HI4320) OX=529507 GN=cysK PE=3 SV=1 - [B4EZR5_PROMH]	139	15	1	12	75.08	33.7948	6.58057	15	0	77	47	0
B4EZN2	Glycerol-3-phosphate dehydrogenase OS=Proteus mirabilis (strain HI4320) OX=529507 GN=glpD PE=3 SV=1 - [B4EZN2_PROMH]	139	14	1	14	35.41	56.4481	6.59521	54	14	26	45	0
Q1R4K2	ATP synthase subunit beta OS=Escherichia coli (strain UTI89 / UPEC) GN=atpD PE=3 SV=1 - [ATPB_ECOUT]	138	17	1	4	49.78	50.2938	5.0083	42	15	0	81	0
O08439	Cell division protein FtsZ OS=Enterococcus faecalis (strain ATCC 700802 / V583) GN=ftsZ PE=3 SV=2 - [FTSZ_ENTFA]	138	13	1	13	43.41	44.1205	4.86865	0	7	50	81	0
Q1RDU7	30S ribosomal protein S1 OS=Escherichia coli (strain UTI89 / UPEC) GN=rpsA PE=3 SV=1 - [Q1RDU7_ECOUT]	137	14	1	3	31.42	61.1207	4.98291	80	6	0	51	0
K9EHB4	Cell division protein FtsZ OS=Actinobaculum massiliense ACS-171-V-Col2 OX=883066 GN=ftsZ PE=3 SV=1 - [K9EHB4_9ACTO]	135	12	1	12	48.4	42.3597	4.51318	43	13	5	2	72
B4F246	Lipoprotein OS=Proteus mirabilis (strain HI4320) OX=529507 GN=metQ PE=3 SV=1 - [B4F246_PROMH]	134	11	1	10	52.77	29.6816	5.30029	34	0	44	56	0
K9EZP8	Uncharacterized protein OS=Actinobaculum massiliense ACS-171-V-Col2 OX=883066 GN=HMPREF9233_01667 PE=4 SV=1 - [K9EZP8_9ACTO]	134	11	1	11	36.72	41.3594	4.93213	39	12	19	5	59
K9EIC3	Protein translocase subunit SecA OS=Actinobaculum massiliense ACS-171-V-Col2 OX=883066 GN=secA PE=3 SV=1 - [K9EIC3_9ACTO]	134	22	1	22	34.51	107.303	5.16064	24	0	0	4	106
Q835J5	Peptidase T OS=Enterococcus faecalis (strain ATCC 700802 / V583) GN=pepT PE=3 SV=1 - [PEPT_ENTFA]	134	15	1	15	60.88	45.3717	4.76709	0	0	118	16	0
Q1RG77	Pyruvate dehydrogenase E1 component OS=Escherichia coli (strain UTI89 / UPEC) GN=aceE PE=4 SV=1 - [Q1RG77_ECOUT]	132	15	1	9	22.32	99.606	5.68115	50	21	0	61	0
K9EF34	Uncharacterized protein OS=Actinobaculum massiliense ACS-171-V-Col2 OX=883066 GN=HMPREF9233_01413 PE=4 SV=1 - [K9EF34_9ACTO]	132	15	1	15	53.63	43.1564	5.21143	34	14	21	18	45
Q834M2	Microcompartment protein OS=Enterococcus faecalis (strain ATCC 700802 / V583) GN=EF_1623 PE=4 SV=1 - [Q834M2_ENTFA]	131	5	1	5	63.54	9.62106	5.32568	2	61	36	32	0
K9EI05	Uncharacterized protein OS=Actinobaculum massiliense ACS-171-V-Col2 OX=883066 GN=HMPREF9233_00268 PE=4 SV=1 - [K9EI05_9ACTO]	131	17	1	17	33.48	74.5421	4.64014	17	2	22	0	90
B4EU89	Uncharacterized protein OS=Proteus mirabilis (strain HI4320) OX=529507 GN=PMI0151 PE=4 SV=1 - [B4EU89_PROMH]	130	9	1	9	57.09	29.3668	5.51611	67	40	18	5	0
B4ET20	Arginine ABC transporter, substrate-binding protein OS=Proteus mirabilis (strain HI4320) OX=529507 GN=artI PE=3 SV=1 - [B4ET20_PROMH]	130	11	1	11	50.82	27.1448	5.37646	9	1	83	37	0
K9EH30	Uncharacterized protein OS=Actinobaculum massiliense ACS-171-V-Col2 OX=883066 GN=HMPREF9233_00031 PE=4 SV=1 - [K9EH30_9ACTO]	130	7	1	7	41.54	28.7385	4.7417	10	8	14	9	89
F2I7Z8	Putative L-lactate oxidase OS=Aerococcus urinae (strain ACS-120-V-Col10a) GN=HMPREF9243_1873 PE=3 SV=1 - [F2I7Z8_AERUA]	129	13	1	13	51.05	41.5017	5.18604	78	51	0	0	0
Q1R6A3	Malate dehydrogenase OS=Escherichia coli (strain UTI89 / UPEC) GN=mdh PE=3 SV=2 - [MDH_ECOUT]	128	11	1	6	49.68	32.3172	5.77002	35	16	27	50	0
B4F161	Triosephosphate isomerase OS=Proteus mirabilis (strain HI4320) OX=529507 GN=tpiA PE=3 SV=1 - [TPIS_PROMH]	126	9	1	7	57.03	27.1881	6.60986	19	10	52	45	0
B4F261	Outer membrane protein OS=Proteus mirabilis (strain HI4320) OX=529507 GN=ompH PE=3 SV=1 - [B4F261_PROMH]	126	8	1	8	47.88	18.2345	9.0415	39	25	30	32	0
F2I7A8	DNA-directed RNA polymerase subunit beta OS=Aerococcus urinae (strain ACS-120-V-Col10a) GN=rpoB PE=3 SV=1 - [F2I7A8_AERUA]	126	19	1	15	21.75	134.756	4.98291	68	45	13	0	0
K9EEH6	Alpha-1,4 glucan phosphorylase OS=Actinobaculum massiliense ACS-171-V-Col2 OX=883066 GN=HMPREF9233_00844 PE=3 SV=1 - [K9EEH6_9ACTO]	126	16	1	16	32.63	90.8852	4.95752	31	2	2	0	91
B4F025	Phosphoenolpyruvate carboxykinase (ATP) OS=Proteus mirabilis (strain HI4320) OX=529507 GN=pckA PE=3 SV=1 - [PCKA_PROMH]	125	21	1	19	61.78	59.311	5.93506	5	0	84	36	0
F2I5S9	Cell division protein FtsZ OS=Aerococcus urinae (strain ACS-120-V-Col10a) GN=ftsZ PE=3 SV=1 - [F2I5S9_AERUA]	125	13	1	13	42.89	46.3313	4.84326	66	59	0	0	0
K9EFN3	Ornithine carbamoyltransferase OS=Actinobaculum massiliense ACS-171-V-Col2 OX=883066 GN=HMPREF9233_01648 PE=3 SV=1 - [K9EFN3_9ACTO]	125	11	2	11	42.39	37.8437	5.04639	48	74	0	1	2
B4EYV8	30S ribosomal protein S7 OS=Proteus mirabilis (strain HI4320) OX=529507 GN=rpsG PE=3 SV=1 - [RS7_PROMH]	124	6	1	2	53.21	17.5904	10.3013	47	25	34	18	0
B4ETJ8	Iron ABC transporter, ATP-binding protein OS=Proteus mirabilis (strain HI4320) OX=529507 GN=sitB PE=4 SV=1 - [B4ETJ8_PROMH]	124	11	1	10	47.12	32.3735	6.7124	53	12	33	26	0
B4EYT5	DNA-binding protein HU-alpha (HU-2) OS=Proteus mirabilis (strain HI4320) OX=529507 GN=hupA PE=3 SV=1 - [B4EYT5_PROMH]	124	4	1	4	57.78	9.46605	9.36377	33	14	44	33	0
K9EXC4	Excisionase family DNA binding domain-containing protein OS=Actinobaculum massiliense ACS-171-V-Col2 OX=883066 GN=HMPREF9233_00424 PE=4 SV=1 - [K9EXC4_9ACTO]	124	3	1	3	64.38	8.08209	5.0083	30	6	19	44	25
F2I8K3	Leucine--tRNA ligase OS=Aerococcus urinae (strain ACS-120-V-Col10a) GN=leuS PE=3 SV=1 - [F2I8K3_AERUA]	123	16	1	15	31.22	91.1735	4.86865	84	39	0	0	0
B4EUU6	Aminoacyl-histidine dipeptidase OS=Proteus mirabilis (strain HI4320) OX=529507 GN=pepD PE=4 SV=1 - [B4EUU6_PROMH]	122	20	1	19	56.91	52.569	5.26221	21	2	69	30	0
F2I7A3	Uncharacterized protein OS=Aerococcus urinae (strain ACS-120-V-Col10a) GN=HMPREF9243_0408 PE=4 SV=1 - [F2I7A3_AERUA]	122	4	1	4	39.46	16.5961	5.0083	61	61	0	0	0
B4EX61	Hemin receptor OS=Proteus mirabilis (strain HI4320) OX=529507 GN=hmuR2 PE=3 SV=1 - [B4EX61_PROMH]	121	18	1	18	41.91	75.2832	6.88818	23	0	42	56	0
K9F113	Uncharacterized protein OS=Actinobaculum massiliense ACS-171-V-Col2 OX=883066 GN=HMPREF9233_00946 PE=4 SV=1 - [K9F113_9ACTO]	121	7	1	6	53.55	23.1331	7.12256	16	8	0	0	97
K9EGG7	Uncharacterized protein OS=Actinobaculum massiliense ACS-171-V-Col2 OX=883066 GN=HMPREF9233_01410 PE=4 SV=1 - [K9EGG7_9ACTO]	121	12	2	12	41.82	47.4314	5.2876	23	3	10	30	55
K9EGH5	Uncharacterized protein OS=Actinobaculum massiliense ACS-171-V-Col2 OX=883066 GN=HMPREF9233_00550 PE=4 SV=1 - [K9EGH5_9ACTO]	121	2	1	2	27.27	14.7555	5.0083	26	18	14	30	33
K9EC36	50S ribosomal protein L4 OS=Actinobaculum massiliense ACS-171-V-Col2 OX=883066 GN=rplD PE=3 SV=1 - [K9EC36_9ACTO]	120	6	1	6	30.23	23.1573	10.0229	28	25	15	1	51
B4F1J9	50S ribosomal protein L6 OS=Proteus mirabilis (strain HI4320) OX=529507 GN=rplF PE=3 SV=1 - [RL6_PROMH]	119	8	1	5	51.98	19.1013	9.70068	23	10	35	51	0
B4EVB7	Aminotransferase OS=Proteus mirabilis (strain HI4320) OX=529507 GN=aspC PE=3 SV=1 - [B4EVB7_PROMH]	119	15	1	13	49.24	43.6191	5.22412	21	6	65	27	0
B4EXE3	10 kDa chaperonin OS=Proteus mirabilis (strain HI4320) OX=529507 GN=groS PE=3 SV=1 - [CH10_PROMH]	118	4	1	3	52.58	10.3686	5.5415	21	10	31	56	0
F2I6N0	Dihydrolipoyl dehydrogenase OS=Aerococcus urinae (strain ACS-120-V-Col10a) GN=lpdA PE=3 SV=1 - [F2I6N0_AERUA]	118	10	1	9	28.78	49.3014	5.46533	52	66	0	0	0
K9EUI6	30S ribosomal protein S4 OS=Actinobaculum massiliense ACS-171-V-Col2 OX=883066 GN=rpsD PE=3 SV=1 - [K9EUI6_9ACTO]	118	12	1	12	60.39	23.7588	10.4917	49	22	9	2	36
Q1R3R3	Glucose-6-phosphate isomerase OS=Escherichia coli (strain UTI89 / UPEC) GN=pgi PE=3 SV=2 - [G6PI_ECOUT]	117	15	1	10	35.88	61.5051	6.3667	28	7	9	73	0
F2I5G0	30S ribosomal protein S1 OS=Aerococcus urinae (strain ACS-120-V-Col10a) GN=rpsA PE=4 SV=1 - [F2I5G0_AERUA]	117	9	1	9	25.45	48.9389	4.81787	64	53	0	0	0
F2I6T4	Oxidoreductase, short chain dehydrogenase/reductase family protein OS=Aerococcus urinae (strain ACS-120-V-Col10a) GN=HMPREF9243_0305 PE=3 SV=1 - [F2I6T4_AERUA]	117	6	1	6	33.08	28.2126	5.36377	58	59	0	0	0
F2I447	Cysteine synthase A OS=Aerococcus urinae (strain ACS-120-V-Col10a) GN=cysK PE=4 SV=1 - [F2I447_AERUA]	117	9	1	9	41.64	32.2687	5.32568	69	48	0	0	0
K9EFI1	Alanine--tRNA ligase OS=Actinobaculum massiliense ACS-171-V-Col2 OX=883066 GN=alaS PE=3 SV=1 - [K9EFI1_9ACTO]	117	26	1	26	44.99	97.1885	5.38916	27	3	5	0	82
K9EBW9	dTDP-4-dehydrorhamnose 3,5-epimerase OS=Actinobaculum massiliense ACS-171-V-Col2 OX=883066 GN=HMPREF9233_01218 PE=4 SV=1 - [K9EBW9_9ACTO]	117	10	1	10	56.1	22.6063	4.89404	16	7	21	2	71
B4F2V8	Xylose isomerase OS=Proteus mirabilis (strain HI4320) OX=529507 GN=xylA PE=3 SV=1 - [B4F2V8_PROMH]	116	13	1	9	37.9	49.4463	5.59229	78	38	0	0	0
K9EET6	Uncharacterized protein OS=Actinobaculum massiliense ACS-171-V-Col2 OX=883066 GN=HMPREF9233_00954 PE=4 SV=1 - [K9EET6_9ACTO]	116	14	1	14	43.12	49.4133	4.91943	61	17	8	0	30
Q836Q9	6-phosphogluconate dehydrogenase, decarboxylating OS=Enterococcus faecalis (strain ATCC 700802 / V583) GN=gnd PE=3 SV=1 - [Q836Q9_ENTFA]	115	18	1	13	56.66	52.5696	4.95752	13	13	64	25	0
Q837Z3	UPF0342 protein EF_0681 OS=Enterococcus faecalis (strain ATCC 700802 / V583) GN=EF_0681 PE=3 SV=1 - [Y681_ENTFA]	114	6	1	6	62.83	13.1284	4.41162	8	3	43	60	0
B4F1K7	30S ribosomal protein S11 OS=Proteus mirabilis (strain HI4320) OX=529507 GN=rpsK PE=3 SV=1 - [RS11_PROMH]	114	5	2	5	60.47	13.8504	11.3267	12	4	12	86	0
F2I4U1	Flavin reductase OS=Aerococcus urinae (strain ACS-120-V-Col10a) GN=HMPREF9243_1067 PE=4 SV=1 - [F2I4U1_AERUA]	114	7	1	7	55.19	20.3002	4.7417	71	43	0	0	0
K9F2H2	2-hydroxy-3-oxopropionate reductase OS=Actinobaculum massiliense ACS-171-V-Col2 OX=883066 GN=HMPREF9233_00457 PE=4 SV=1 - [K9F2H2_9ACTO]	114	8	1	8	50.67	31.2491	5.021	43	5	9	0	57
Q82ZH5	Iron compound ABC transporter, substrate-binding protein OS=Enterococcus faecalis (strain ATCC 700802 / V583) GN=EF_3082 PE=4 SV=1 - [Q82ZH5_ENTFA]	114	13	1	13	52.05	34.4209	6.1001	0	21	67	26	0
B4EXX8	Putative non-ribosomal peptide synthase (Putative siderophore synthase) OS=Proteus mirabilis (strain HI4320) OX=529507 GN=nrpS PE=4 SV=1 - [B4EXX8_PROMH]	114	33	1	33	15.56	345.063	5.84619	0	0	74	40	0
B4EW37	Outer membrane protein TolC OS=Proteus mirabilis (strain HI4320) OX=529507 GN=tolC PE=4 SV=1 - [B4EW37_PROMH]	113	8	1	7	24.09	50.9451	5.65576	25	2	54	32	0
F2I8Y2	2,3-bisphosphoglycerate-dependent phosphoglycerate mutase OS=Aerococcus urinae (strain ACS-120-V-Col10a) GN=gpmA PE=3 SV=1 - [F2I8Y2_AERUA]	113	9	1	8	65.33	25.694	5.61768	61	52	0	0	0
K9EH16	Uncharacterized protein OS=Actinobaculum massiliense ACS-171-V-Col2 OX=883066 GN=HMPREF9233_00011 PE=4 SV=1 - [K9EH16_9ACTO]	113	14	1	14	40.94	51.0581	5.47803	38	5	0	1	69
H7C6Z5	2-dehydropantoate 2-reductase OS=Enterococcus faecalis (strain ATCC 700802 / V583) GN=EF_0517 PE=3 SV=1 - [H7C6Z5_ENTFA]	112	11	2	11	44.23	33.9683	5.63037	1	2	81	28	0
K9EUL9	Carbamate kinase OS=Actinobaculum massiliense ACS-171-V-Col2 OX=883066 GN=HMPREF9233_01649 PE=3 SV=1 - [K9EUL9_9ACTO]	112	13	1	13	64.24	31.7555	4.86865	49	59	0	0	4
Q1R5U9	50S ribosomal protein L1 OS=Escherichia coli (strain UTI89 / UPEC) GN=rplA PE=3 SV=1 - [RL1_ECOUT]	111	8	1	4	42.74	24.7143	9.64209	36	20	11	44	0
B4F0Y6	Dihydrolipoyl dehydrogenase OS=Proteus mirabilis (strain HI4320) OX=529507 GN=lpdA PE=3 SV=1 - [B4F0Y6_PROMH]	110	15	1	11	43.16	50.6454	6.12549	31	5	38	36	0
F2I5H6	ATP-dependent 6-phosphofructokinase OS=Aerococcus urinae (strain ACS-120-V-Col10a) GN=pfkA PE=3 SV=1 - [F2I5H6_AERUA]	110	9	1	9	37.2	35.5361	5.88428	48	34	5	23	0
K9EDR6	50S ribosomal protein L3 OS=Actinobaculum massiliense ACS-171-V-Col2 OX=883066 GN=rplC PE=3 SV=1 - [K9EDR6_9ACTO]	110	8	1	8	56.11	23.2173	10.272	33	27	10	7	33
B4EXM1	Putative stringent starvation protein A OS=Proteus mirabilis (strain HI4320) OX=529507 GN=sspA PE=3 SV=1 - [B4EXM1_PROMH]	109	9	1	6	60.56	24.2703	4.99561	33	9	45	22	0
B4ESZ4	6-phosphogluconate dehydrogenase, decarboxylating OS=Proteus mirabilis (strain HI4320) OX=529507 GN=gnd PE=3 SV=1 - [B4ESZ4_PROMH]	109	14	1	9	41.67	51.5063	5.49072	32	5	39	33	0
K9F3J1	Glycine--tRNA ligase OS=Actinobaculum massiliense ACS-171-V-Col2 OX=883066 GN=glyQS PE=3 SV=1 - [K9F3J1_9ACTO]	109	12	1	12	31.61	53.1647	5.46533	37	6	8	3	55
K9F0B1	GMP synthase [glutamine-hydrolyzing] OS=Actinobaculum massiliense ACS-171-V-Col2 OX=883066 GN=guaA PE=3 SV=1 - [K9F0B1_9ACTO]	108	16	1	15	48.08	56.1116	5.12256	22	3	0	0	83
K9ECV5	Uncharacterized protein OS=Actinobaculum massiliense ACS-171-V-Col2 OX=883066 GN=HMPREF9233_00860 PE=4 SV=1 - [K9ECV5_9ACTO]	108	9	1	9	35.99	43.4032	4.51318	14	9	1	0	84
K9EFQ2	Trigger factor OS=Actinobaculum massiliense ACS-171-V-Col2 OX=883066 GN=tig PE=3 SV=1 - [K9EFQ2_9ACTO]	108	10	1	10	24.45	58.7823	4.4624	38	10	2	2	56
K9EUC6	Putative glucose-6-phosphate 1-epimerase OS=Actinobaculum massiliense ACS-171-V-Col2 OX=883066 GN=HMPREF9233_01534 PE=3 SV=1 - [K9EUC6_9ACTO]	107	9	1	8	47.57	30.8752	4.51318	24	9	39	5	30
K9F0I4	Uncharacterized protein OS=Actinobaculum massiliense ACS-171-V-Col2 OX=883066 GN=HMPREF9233_01138 PE=4 SV=1 - [K9F0I4_9ACTO]	107	16	1	16	64.86	35.3812	7.1958	28	10	5	0	64
B4EXB0	Oligopeptide ABC transporter, oligopeptide-binding protein OS=Proteus mirabilis (strain HI4320) OX=529507 GN=oppA PE=4 SV=1 - [B4EXB0_PROMH]	107	19	1	19	52.11	61.8594	5.88428	0	4	79	24	0
Q836Q0	Universal stress protein family OS=Enterococcus faecalis (strain ATCC 700802 / V583) GN=EF_1058 PE=3 SV=1 - [Q836Q0_ENTFA]	106	8	1	8	64.54	15.9085	7.2251	8	7	24	67	0
F2I5S4	Isoleucine--tRNA ligase OS=Aerococcus urinae (strain ACS-120-V-Col10a) GN=ileS PE=3 SV=1 - [F2I5S4_AERUA]	106	13	1	13	18.99	106.343	4.94482	54	52	0	0	0
K9F054	50S ribosomal protein L13 OS=Actinobaculum massiliense ACS-171-V-Col2 OX=883066 GN=rplM PE=3 SV=1 - [K9F054_9ACTO]	105	7	1	7	63.27	16.2197	9.83252	37	20	5	13	30
Q835N2	Sugar ABC transporter, sugar-binding protein OS=Enterococcus faecalis (strain ATCC 700802 / V583) GN=EF_1345 PE=4 SV=1 - [Q835N2_ENTFA]	105	13	1	13	50	45.4987	5.23682	0	0	94	11	0
K9EVS8	Glutamate dehydrogenase OS=Actinobaculum massiliense ACS-171-V-Col2 OX=883066 GN=HMPREF9233_00848 PE=3 SV=1 - [K9EVS8_9ACTO]	104	8	1	7	23.37	48.131	5.021	39	51	7	0	7
K9EI86	Transcription termination factor Rho OS=Actinobaculum massiliense ACS-171-V-Col2 OX=883066 GN=rho PE=3 SV=1 - [K9EI86_9ACTO]	104	20	1	20	39.32	70.8938	9.74463	17	5	3	0	79
Q1RAF9	HMWP1 nonribosomal peptide/polyketide synthase OS=Escherichia coli (strain UTI89 / UPEC) GN=irp1 PE=4 SV=1 - [Q1RAF9_ECOUT]	104	27	1	27	10.37	348.602	5.73193	0	0	1	103	0
F2I522	Acetyl-CoA C-acetyltransferase OS=Aerococcus urinae (strain ACS-120-V-Col10a) GN=HMPREF9243_1160 PE=3 SV=1 - [F2I522_AERUA]	103	11	1	11	42.17	43.8343	5.33838	56	47	0	0	0
Q836E7	Fructose-bisphosphate aldolase class-II OS=Enterococcus faecalis (strain ATCC 700802 / V583) GN=fba PE=3 SV=1 - [Q836E7_ENTFA]	103	10	1	10	52.6	30.7935	4.95752	0	0	91	11	1
F2I7D5	Aromatic-amino-acid transaminase OS=Aerococcus urinae (strain ACS-120-V-Col10a) GN=HMPREF9243_0449 PE=4 SV=1 - [F2I7D5_AERUA]	102	7	1	7	24.02	42.6327	5.08447	72	30	0	0	0
K9EYM7	Proline--tRNA ligase OS=Actinobaculum massiliense ACS-171-V-Col2 OX=883066 GN=proS PE=3 SV=1 - [K9EYM7_9ACTO]	102	21	1	21	49.66	65.6387	5.021	17	6	28	1	50
Q834N3	Probable manganese-dependent inorganic pyrophosphatase OS=Enterococcus faecalis (strain ATCC 700802 / V583) GN=ppaC PE=3 SV=1 - [PPAC_ENTFA]	102	10	1	10	49.03	33.462	4.50049	0	0	66	36	0
K9EYL4	30S ribosomal protein S15 OS=Actinobaculum massiliense ACS-171-V-Col2 OX=883066 GN=rpsO PE=3 SV=1 - [K9EYL4_9ACTO]	101	4	1	4	64.04	10.3816	9.68604	22	17	6	6	50
K9F3F9	3-methyl-2-oxobutanoate hydroxymethyltransferase OS=Actinobaculum massiliense ACS-171-V-Col2 OX=883066 GN=panB PE=3 SV=1 - [K9F3F9_9ACTO]	101	6	1	6	31.03	31.2449	5.75732	45	15	29	2	10
B4F1K8	30S ribosomal protein S4 OS=Proteus mirabilis (strain HI4320) OX=529507 GN=rpsD PE=3 SV=1 - [RS4_PROMH]	100	7	1	5	42.72	23.5596	10.0229	25	16	23	36	0
B4EX84	Universal stress protein OS=Proteus mirabilis (strain HI4320) OX=529507 GN=uspG1 PE=3 SV=1 - [B4EX84_PROMH]	100	6	1	6	52.41	16.0505	6.68311	24	1	27	48	0
F2I7A9	DNA-directed RNA polymerase subunit beta' OS=Aerococcus urinae (strain ACS-120-V-Col10a) GN=rpoC PE=3 SV=1 - [F2I7A9_AERUA]	100	22	1	16	22.32	137.64	6.48096	58	42	0	0	0
F2I7P6	Ribose-phosphate pyrophosphokinase OS=Aerococcus urinae (strain ACS-120-V-Col10a) GN=prs PE=3 SV=1 - [F2I7P6_AERUA]	100	8	1	8	29	36.3647	5.16064	42	58	0	0	0
K9EVC8	Glucose-6-phosphate isomerase OS=Actinobaculum massiliense ACS-171-V-Col2 OX=883066 GN=pgi PE=3 SV=1 - [K9EVC8_9ACTO]	100	16	1	16	42.83	60.8036	5.17334	24	8	22	0	46
K9ECM9	Lipoprotein OS=Actinobaculum massiliense ACS-171-V-Col2 OX=883066 GN=HMPREF9233_01162 PE=3 SV=1 - [K9ECM9_9ACTO]	100	9	1	9	42.21	31.3761	4.86865	33	22	15	5	25
K9EYP4	50S ribosomal protein L19 OS=Actinobaculum massiliense ACS-171-V-Col2 OX=883066 GN=rplS PE=3 SV=1 - [K9EYP4_9ACTO]	100	5	1	5	43.1	13.174	10.3013	37	21	16	5	21
K9EVB5	Formate acetyltransferase OS=Actinobaculum massiliense ACS-171-V-Col2 OX=883066 GN=HMPREF9233_01341 PE=4 SV=1 - [K9EVB5_9ACTO]	100	4	1	4	60.98	9.39669	6.13818	37	21	10	12	20
K9F0K3	Iron-sulfur cluster-binding protein OS=Actinobaculum massiliense ACS-171-V-Col2 OX=883066 GN=HMPREF9233_01168 PE=4 SV=1 - [K9F0K3_9ACTO]	100	13	1	13	26.91	66.596	8.67529	0	0	0	0	100
Q838A7	Uncharacterized protein OS=Enterococcus faecalis (strain ATCC 700802 / V583) GN=EF_0665 PE=4 SV=1 - [Q838A7_ENTFA]	99	4	1	4	77.19	6.66646	4.71631	16	8	55	20	0
Q837D6	Peptide ABC transporter, peptide-binding protein OS=Enterococcus faecalis (strain ATCC 700802 / V583) GN=EF_0907 PE=1 SV=1 - [Q837D6_ENTFA]	98	18	1	17	47.66	60.8301	4.93213	3	13	63	19	0
B4EVY8	Putative exported protein OS=Proteus mirabilis (strain HI4320) OX=529507 GN=PMI1297 PE=4 SV=1 - [B4EVY8_PROMH]	98	15	1	15	35.37	61.7478	4.76709	36	2	41	19	0
K9EBS9	Glucose-1-phosphate adenylyltransferase OS=Actinobaculum massiliense ACS-171-V-Col2 OX=883066 GN=glgC PE=3 SV=1 - [K9EBS9_9ACTO]	98	12	1	12	50.6	46.0442	5.21143	11	1	17	3	66
K9EV26	50S ribosomal protein L15 OS=Actinobaculum massiliense ACS-171-V-Col2 OX=883066 GN=rplO PE=3 SV=1 - [K9EV26_9ACTO]	98	6	1	6	54.66	17.1841	9.65674	34	17	7	1	39
B4F1Q3	Chaperone protein HtpG OS=Proteus mirabilis (strain HI4320) OX=529507 GN=htpG PE=3 SV=1 - [B4F1Q3_PROMH]	97	20	1	16	40.35	71.4891	5.10986	26	0	45	26	0
B4EWC5	Uridine phosphorylase OS=Proteus mirabilis (strain HI4320) OX=529507 GN=udp PE=3 SV=1 - [B4EWC5_PROMH]	97	9	1	8	61.11	27.2799	6.13818	24	10	46	17	0
F2I7S3	30S ribosomal protein S3 OS=Aerococcus urinae (strain ACS-120-V-Col10a) GN=rpsC PE=3 SV=1 - [F2I7S3_AERUA]	97	7	1	7	42.59	24.0855	6.25244	57	40	0	0	0
K9EZY7	Uncharacterized protein OS=Actinobaculum massiliense ACS-171-V-Col2 OX=883066 GN=HMPREF9233_01249 PE=4 SV=1 - [K9EZY7_9ACTO]	97	10	1	10	50	34.7025	4.7417	25	6	2	3	61
K9EGF1	Uncharacterized protein OS=Actinobaculum massiliense ACS-171-V-Col2 OX=883066 GN=HMPREF9233_01385 PE=3 SV=1 - [K9EGF1_9ACTO]	97	16	1	16	41.24	55.4927	5.26221	13	3	30	0	51
K9EZZ7	50S ribosomal protein L1 OS=Actinobaculum massiliense ACS-171-V-Col2 OX=883066 GN=rplA PE=3 SV=1 - [K9EZZ7_9ACTO]	97	7	1	7	41.63	25.0409	9.15869	20	15	10	4	48
Q839X9	PTS system, mannose-specific IIAB components OS=Enterococcus faecalis (strain ATCC 700802 / V583) GN=EF_0020 PE=4 SV=1 - [Q839X9_ENTFA]	96	12	1	12	42.12	35.5015	5.23682	1	4	54	37	0
F2I8I4	UPF0342 protein HMPREF9243_0644 OS=Aerococcus urinae (strain ACS-120-V-Col10a) GN=HMPREF9243_0644 PE=3 SV=1 - [F2I8I4_AERUA]	96	5	1	5	45.31	14.8442	4.4751	54	42	0	0	0
K9EF01	Uncharacterized protein OS=Actinobaculum massiliense ACS-171-V-Col2 OX=883066 GN=HMPREF9233_01004 PE=3 SV=1 - [K9EF01_9ACTO]	96	9	1	9	35.01	38.2472	4.60205	11	9	6	2	68
Q1R5V4	DNA-directed RNA polymerase subunit beta' OS=Escherichia coli (strain UTI89 / UPEC) GN=rpoC PE=3 SV=1 - [RPOC_ECOUT]	95	21	1	9	17.13	155.077	7.07861	37	0	23	35	0
Q1R6U8	Outer membrane protein TolC OS=Escherichia coli (strain UTI89 / UPEC) GN=tolC PE=4 SV=1 - [Q1R6U8_ECOUT]	95	6	1	5	16.8	55.0808	5.65576	9	0	11	75	0
B4EZ60	Catabolite gene activator (cAMP receptor protein) OS=Proteus mirabilis (strain HI4320) OX=529507 GN=crp PE=4 SV=1 - [B4EZ60_PROMH]	95	8	2	8	40	23.6433	7.48877	29	11	21	34	0
Q1R9Q7	Pseudouridine-5'-phosphate glycosidase OS=Escherichia coli (strain UTI89 / UPEC) GN=yeiN PE=3 SV=1 - [Q1R9Q7_ECOUT]	94	11	1	11	48.08	32.9594	5.16064	8	9	16	61	0
Q1R8V7	Cysteine synthase OS=Escherichia coli (strain UTI89 / UPEC) GN=cysK PE=3 SV=1 - [Q1R8V7_ECOUT]	94	12	1	9	53.87	34.4683	6.06201	5	0	23	66	0
B4ESQ9	2-oxoglutarate dehydrogenase E1 component OS=Proteus mirabilis (strain HI4320) OX=529507 GN=sucA PE=4 SV=1 - [B4ESQ9_PROMH]	94	18	1	18	27.3	105.392	5.97314	15	0	66	13	0
K9F360	6-phosphogluconate dehydrogenase, decarboxylating OS=Actinobaculum massiliense ACS-171-V-Col2 OX=883066 GN=HMPREF9233_00647 PE=3 SV=1 - [K9F360_9ACTO]	94	9	1	9	34.02	53.0553	5.0083	24	7	1	1	61
Q1R5U2	30S ribosomal protein S7 OS=Escherichia coli (strain UTI89 / UPEC) GN=rpsG PE=3 SV=1 - [RS7_ECOUT]	93	6	1	2	53.21	17.5934	10.3013	38	18	19	18	0
Q1REB0	Outer membrane protein X OS=Escherichia coli (strain UTI89 / UPEC) GN=ompX PE=4 SV=1 - [Q1REB0_ECOUT]	93	7	1	7	47.4	18.821	7.1665	30	10	7	46	0
B4EYI5	Quinone oxidoreductase OS=Proteus mirabilis (strain HI4320) OX=529507 GN=qor PE=4 SV=1 - [B4EYI5_PROMH]	93	14	1	14	69.42	34.8852	8.44092	9	0	62	22	0
F2I816	DNA-directed RNA polymerase subunit alpha OS=Aerococcus urinae (strain ACS-120-V-Col10a) GN=rpoA PE=3 SV=1 - [F2I816_AERUA]	93	11	1	10	45.54	35.0761	4.75439	48	41	0	4	0
K9EDS4	50S ribosomal protein L22 OS=Actinobaculum massiliense ACS-171-V-Col2 OX=883066 GN=rplV PE=3 SV=1 - [K9EDS4_9ACTO]	93	6	1	6	43.08	14.8389	10.5503	34	22	8	12	17
K9EGU5	Uncharacterized protein OS=Actinobaculum massiliense ACS-171-V-Col2 OX=883066 GN=HMPREF9233_00897 PE=3 SV=1 - [K9EGU5_9ACTO]	93	11	1	11	55.71	38.1713	4.84326	24	1	34	0	34
Q82Z41	DNA-directed RNA polymerase subunit beta' OS=Enterococcus faecalis (strain ATCC 700802 / V583) GN=rpoC PE=3 SV=1 - [RPOC_ENTFA]	92	19	1	12	21.94	136.729	6.90283	19	0	52	21	0
B4EUB4	Putative exported protein OS=Proteus mirabilis (strain HI4320) OX=529507 GN=PMI0176 PE=4 SV=1 - [B4EUB4_PROMH]	92	2	1	2	17.84	20.7782	5.21143	24	14	52	2	0
K9EC52	50S ribosomal protein L18 OS=Actinobaculum massiliense ACS-171-V-Col2 OX=883066 GN=rplR PE=3 SV=1 - [K9EC52_9ACTO]	92	7	1	7	52.03	13.2092	11.605	31	19	12	5	25
K9EFT1	Uncharacterized protein OS=Actinobaculum massiliense ACS-171-V-Col2 OX=883066 GN=HMPREF9233_00285 PE=4 SV=1 - [K9EFT1_9ACTO]	92	10	1	10	50.81	28.3483	5.52881	5	0	31	0	56
Q1R5V3	DNA-directed RNA polymerase subunit beta OS=Escherichia coli (strain UTI89 / UPEC) GN=rpoB PE=3 SV=2 - [RPOB_ECOUT]	91	21	1	9	21.16	150.538	5.26221	63	4	0	24	0
Q1R2J3	Mannonate dehydratase OS=Escherichia coli (strain UTI89 / UPEC) GN=uxuA PE=3 SV=1 - [UXUA_ECOUT]	91	11	1	11	40.1	44.7956	5.61768	28	14	1	48	0
F2I7T3	30S ribosomal protein S5 OS=Aerococcus urinae (strain ACS-120-V-Col10a) GN=rpsE PE=3 SV=1 - [F2I7T3_AERUA]	91	6	1	6	57.74	17.4335	9.89111	52	39	0	0	0
F2I471	Thioredoxin OS=Aerococcus urinae (strain ACS-120-V-Col10a) GN=trxA PE=3 SV=1 - [F2I471_AERUA]	91	7	1	7	66.35	11.8097	4.28467	53	38	0	0	0
K9EJD8	Uncharacterized protein OS=Actinobaculum massiliense ACS-171-V-Col2 OX=883066 GN=HMPREF9233_00029 PE=3 SV=1 - [K9EJD8_9ACTO]	91	6	1	6	52	16.5364	4.79248	31	26	10	2	22
K9EDX1	Uncharacterized protein OS=Actinobaculum massiliense ACS-171-V-Col2 OX=883066 GN=HMPREF9233_00749 PE=4 SV=1 - [K9EDX1_9ACTO]	91	15	1	15	55.31	34.8744	5.31299	18	15	12	7	39
K9EFY5	UPF0182 protein HMPREF9233_00355 OS=Actinobaculum massiliense ACS-171-V-Col2 OX=883066 GN=HMPREF9233_00355 PE=3 SV=1 - [K9EFY5_9ACTO]	91	17	1	16	26.68	110.923	5.0083	0	0	1	0	90
K9F251	Carbamate kinase OS=Actinobaculum massiliense ACS-171-V-Col2 OX=883066 GN=HMPREF9233_00352 PE=3 SV=1 - [K9F251_9ACTO]	91	10	1	10	45.22	32.6746	4.75439	0	0	0	0	91
Q839H4	2,3-bisphosphoglycerate-dependent phosphoglycerate mutase OS=Enterococcus faecalis (strain ATCC 700802 / V583) GN=gpmA PE=3 SV=1 - [GPMA_ENTFA]	90	8	1	7	66.67	25.9912	5.21143	16	13	47	14	0
H7C7A0	Alkyl hydroperoxide reductase, C subunit OS=Enterococcus faecalis (strain ATCC 700802 / V583) GN=ahpC PE=4 SV=1 - [H7C7A0_ENTFA]	90	10	1	10	65.24	21.0771	4.62744	4	8	55	23	0
K9EDR8	Adenine deaminase OS=Actinobaculum massiliense ACS-171-V-Col2 OX=883066 GN=HMPREF9233_00719 PE=3 SV=1 - [K9EDR8_9ACTO]	90	12	1	12	49.26	37.78	4.729	13	2	21	1	53
K9ECU9	Glutamate--tRNA ligase OS=Actinobaculum massiliense ACS-171-V-Col2 OX=883066 GN=gltX PE=3 SV=1 - [K9ECU9_9ACTO]	90	14	1	14	37.62	56.4305	4.93213	36	4	5	0	45
K9ED48	2-dehydro-3-deoxyphosphogluconate aldolase/4-hydroxy-2-oxoglutarate aldolase OS=Actinobaculum massiliense ACS-171-V-Col2 OX=883066 GN=HMPREF9233_01565 PE=4 SV=1 - [K9ED48_9ACTO]	90	5	1	5	49.07	23.0791	5.19873	31	11	15	0	33
B4EXE5	Aspartate ammonia-lyase OS=Proteus mirabilis (strain HI4320) OX=529507 GN=aspA PE=3 SV=1 - [B4EXE5_PROMH]	89	13	1	12	33.12	51.9555	5.5542	31	12	24	22	0
F2I4Z9	Aldehyde dehydrogenase (NAD) family protein OS=Aerococcus urinae (strain ACS-120-V-Col10a) GN=HMPREF9243_1132 PE=3 SV=1 - [F2I4Z9_AERUA]	89	10	1	10	28.8	53.9575	4.97021	42	47	0	0	0
B4ETV2	Putative exported L-asparaginase OS=Proteus mirabilis (strain HI4320) OX=529507 GN=PMI1222 PE=4 SV=1 - [B4ETV2_PROMH]	88	14	1	14	56.52	36.7005	6.7124	9	9	58	12	0
K9F0H6	Ribose-phosphate pyrophosphokinase OS=Actinobaculum massiliense ACS-171-V-Col2 OX=883066 GN=prs PE=3 SV=1 - [K9F0H6_9ACTO]	88	12	1	12	55.05	35.5508	6.56592	28	3	16	4	37
Q82YW3	Citrate lyase alpha chain OS=Enterococcus faecalis (strain ATCC 700802 / V583) GN=citF PE=4 SV=1 - [Q82YW3_ENTFA]	88	11	1	11	38.72	50.1069	5.36377	0	0	45	43	0
Q1R9R7	Colicin I receptor OS=Escherichia coli (strain UTI89 / UPEC) GN=cirA PE=3 SV=1 - [Q1R9R7_ECOUT]	87	17	1	17	32.03	77.048	5.38916	4	0	3	80	0
Q1RFZ1	Lipoprotein OS=Escherichia coli (strain UTI89 / UPEC) GN=metQ PE=3 SV=1 - [Q1RFZ1_ECOUT]	87	9	1	7	40.59	29.4136	5.2876	20	1	13	53	0
Q831V0	Elongation factor Ts OS=Enterococcus faecalis (strain ATCC 700802 / V583) GN=tsf PE=3 SV=1 - [EFTS_ENTFA]	87	13	1	12	59.39	32.1133	4.94482	4	5	49	29	0
B4F1V4	Thioredoxin OS=Proteus mirabilis (strain HI4320) OX=529507 GN=trxA PE=3 SV=1 - [B4F1V4_PROMH]	87	5	1	4	51.85	11.6971	4.97021	20	5	21	41	0
K9EC22	50S ribosomal protein L11 OS=Actinobaculum massiliense ACS-171-V-Col2 OX=883066 GN=rplK PE=3 SV=1 - [K9EC22_9ACTO]	87	5	1	5	34.03	15.1111	9.23193	29	10	16	4	28
Q839J8	GMP synthase [glutamine-hydrolyzing] OS=Enterococcus faecalis (strain ATCC 700802 / V583) GN=guaA PE=3 SV=1 - [GUAA_ENTFA]	86	18	1	13	46.35	57.2853	4.94482	23	14	39	10	0
B4EYS5	KHG/KDPG aldolase [includes: 4-hydroxy-2-oxoglutarate aldolase and 2-dehydro-3-deoxy-phosphogluconate aldolase] OS=Proteus mirabilis (strain HI4320) OX=529507 GN=eda PE=4 SV=1 - [B4EYS5_PROMH]	86	7	1	5	35.68	22.1577	5.88428	27	10	31	18	0
B4F1A2	Acetoin(Diacetyl) reductase OS=Proteus mirabilis (strain HI4320) OX=529507 GN=budC PE=4 SV=1 - [B4F1A2_PROMH]	86	7	1	7	44.02	27.2381	5.37646	6	5	27	48	0
B4EXK8	Putative toluene tolerance protein OS=Proteus mirabilis (strain HI4320) OX=529507 GN=PMI3658 PE=4 SV=1 - [B4EXK8_PROMH]	85	9	1	9	56.94	23.8685	8.88037	1	3	75	6	0
B4F2L9	Putative endoribonuclease OS=Proteus mirabilis (strain HI4320) OX=529507 GN=tdcF PE=4 SV=1 - [B4F2L9_PROMH]	85	4	1	4	35.16	13.7412	4.91943	28	21	28	8	0
B4EVR3	Ribose-phosphate pyrophosphokinase OS=Proteus mirabilis (strain HI4320) OX=529507 GN=prsA PE=3 SV=1 - [B4EVR3_PROMH]	85	10	1	5	41.59	34.2467	5.59229	28	2	22	33	0
F2I515	Elongation factor Ts OS=Aerococcus urinae (strain ACS-120-V-Col10a) GN=tsf PE=3 SV=1 - [F2I515_AERUA]	85	10	1	10	53.61	32.8135	4.84326	51	34	0	0	0
K9F1X2	Uracil phosphoribosyltransferase OS=Actinobaculum massiliense ACS-171-V-Col2 OX=883066 GN=upp PE=3 SV=1 - [K9F1X2_9ACTO]	85	11	1	11	62.74	23.0122	5.021	17	11	4	3	50
Q1R7N6	L-fucose mutarotase OS=Escherichia coli (strain UTI89 / UPEC) GN=fucU PE=3 SV=1 - [FUCM_ECOUT]	84	4	1	4	30.71	15.4632	5.85889	26	27	2	29	0
Q82ZC9	Mannonate dehydratase OS=Enterococcus faecalis (strain ATCC 700802 / V583) GN=uxuA PE=1 SV=1 - [UXUA_ENTFA]	84	9	1	9	36.97	40.2564	5.47803	8	2	48	26	0
B4EYV0	50S ribosomal protein L7/L12 OS=Proteus mirabilis (strain HI4320) OX=529507 GN=rplL PE=3 SV=1 - [RL7_PROMH]	84	8	1	4	81.82	12.3635	4.60205	20	18	21	24	1
B4F1K9	DNA-directed RNA polymerase subunit alpha OS=Proteus mirabilis (strain HI4320) OX=529507 GN=rpoA PE=3 SV=1 - [B4F1K9_PROMH]	84	10	1	3	45.29	36.4672	5.10986	46	7	15	16	0
K9EV14	30S ribosomal protein S8 OS=Actinobaculum massiliense ACS-171-V-Col2 OX=883066 GN=rpsH PE=3 SV=1 - [K9EV14_9ACTO]	84	4	1	4	45.45	14.5457	9.36377	34	12	10	2	26
K9EBH5	Uncharacterized protein OS=Actinobaculum massiliense ACS-171-V-Col2 OX=883066 GN=HMPREF9233_01566 PE=4 SV=1 - [K9EBH5_9ACTO]	84	11	1	11	45.65	40.111	5.13525	43	4	3	2	32
B4EXB5	Putative nickel/di-oligopepetide ABC transporter, substrate-binding protein OS=Proteus mirabilis (strain HI4320) OX=529507 GN=yntA PE=4 SV=1 - [B4EXB5_PROMH]	83	12	1	12	36.81	57.8481	5.74463	1	0	69	13	0
F2I8D6	Glutamyl-tRNA(Gln) amidotransferase subunit A OS=Aerococcus urinae (strain ACS-120-V-Col10a) GN=gatA PE=3 SV=1 - [F2I8D6_AERUA]	83	12	1	12	42.86	52.2911	4.64014	63	20	0	0	0
F2I8L8	Phosphate acetyltransferase OS=Aerococcus urinae (strain ACS-120-V-Col10a) GN=pta PE=4 SV=1 - [F2I8L8_AERUA]	83	6	1	6	28.92	35.5662	4.91943	51	32	0	0	0
K9EE22	Anthranilate phosphoribosyltransferase OS=Actinobaculum massiliense ACS-171-V-Col2 OX=883066 GN=trpD PE=3 SV=1 - [K9EE22_9ACTO]	83	9	1	9	42.73	35.764	5.03369	23	3	0	0	57
Q82ZF4	Peptide ABC transporter, peptide-binding protein OS=Enterococcus faecalis (strain ATCC 700802 / V583) GN=EF_3106 PE=4 SV=1 - [Q82ZF4_ENTFA]	83	13	1	13	29.51	65.8647	5.021	0	0	68	15	0
Q1RG24	2,3,4,5-tetrahydropyridine-2,6-dicarboxylate N-succinyltransferase OS=Escherichia coli (strain UTI89 / UPEC) GN=dapD PE=3 SV=1 - [DAPD_ECOUT]	82	9	1	5	49.27	29.8725	6.01123	29	10	0	43	0
B4EV89	Leucine-responsive regulator OS=Proteus mirabilis (strain HI4320) OX=529507 GN=lrp PE=4 SV=1 - [B4EV89_PROMH]	82	7	1	2	47.56	18.905	8.77783	26	6	22	28	0
K9EBY2	Glucose-1-phosphate thymidylyltransferase OS=Actinobaculum massiliense ACS-171-V-Col2 OX=883066 GN=HMPREF9233_01228 PE=3 SV=1 - [K9EBY2_9ACTO]	82	10	1	9	46.62	32.4375	5.03369	20	8	34	0	20
K9EE65	Uncharacterized protein OS=Actinobaculum massiliense ACS-171-V-Col2 OX=883066 GN=HMPREF9233_00311 PE=4 SV=1 - [K9EE65_9ACTO]	82	8	1	8	45.07	32.2629	4.70361	13	4	13	4	48
Q82Z04	Hydantoinase/oxoprolinase OS=Enterococcus faecalis (strain ATCC 700802 / V583) GN=EF_3275 PE=4 SV=1 - [Q82Z04_ENTFA]	82	11	1	11	36.56	54.6395	5.13525	0	0	34	48	0
Q1RDS9	Aminotransferase OS=Escherichia coli (strain UTI89 / UPEC) GN=aspC PE=3 SV=1 - [Q1RDS9_ECOUT]	81	14	1	12	44.19	43.5421	5.77002	15	14	10	42	0
Q820V3	3-hydroxyacyl-[acyl-carrier-protein] dehydratase FabZ OS=Enterococcus faecalis (strain ATCC 700802 / V583) GN=fabZ1 PE=3 SV=1 - [FABZ1_ENTFA]	81	6	1	6	47.22	16.2315	5.98584	1	5	24	51	0
Q833M6	Uncharacterized protein OS=Enterococcus faecalis (strain ATCC 700802 / V583) GN=EF_1918 PE=4 SV=1 - [Q833M6_ENTFA]	81	11	1	11	47.66	37.7857	4.61475	1	0	70	10	0
Q832Z4	ABC transporter, ATP-binding protein OS=Enterococcus faecalis (strain ATCC 700802 / V583) GN=EF_2074 PE=4 SV=1 - [Q832Z4_ENTFA]	81	10	1	10	59.44	27.3629	9.14404	1	3	53	24	0
F2I6F2	4-phosphoerythronate dehydrogenase OS=Aerococcus urinae (strain ACS-120-V-Col10a) GN=pdxB PE=3 SV=1 - [F2I6F2_AERUA]	81	7	1	7	28.06	37.6521	4.93213	35	46	0	0	0
K9EFE4	Threonine--tRNA ligase OS=Actinobaculum massiliense ACS-171-V-Col2 OX=883066 GN=thrS PE=3 SV=1 - [K9EFE4_9ACTO]	81	16	1	16	32.64	76.2679	5.24951	25	3	2	0	51
K9EZI1	DNA-directed RNA polymerase subunit omega OS=Actinobaculum massiliense ACS-171-V-Col2 OX=883066 GN=rpoZ PE=3 SV=1 - [K9EZI1_9ACTO]	81	4	1	4	54.35	14.7481	4.34814	18	0	3	0	60
Q1R636	30S ribosomal protein S4 OS=Escherichia coli (strain UTI89 / UPEC) GN=rpsD PE=3 SV=1 - [RS4_ECOUT]	80	5	1	3	31.07	23.4546	10.0522	23	14	8	35	0
B4F132	ADP-L-glycero-D-manno-heptose-6-epimerase OS=Proteus mirabilis (strain HI4320) OX=529507 GN=hldD PE=3 SV=1 - [HLDD_PROMH]	80	11	1	8	45.83	35.171	4.97021	17	0	31	32	0
F2I8F0	Receptor family ligand-binding protein OS=Aerococcus urinae (strain ACS-120-V-Col10a) GN=HMPREF9243_1975 PE=4 SV=1 - [F2I8F0_AERUA]	80	9	1	9	37.76	42.5289	4.55127	44	36	0	0	0
F2I527	Enoyl-CoA hydratase/isomerase family protein OS=Aerococcus urinae (strain ACS-120-V-Col10a) GN=HMPREF9243_1169 PE=4 SV=1 - [F2I527_AERUA]	80	4	1	4	25.19	29.1047	5.021	37	43	0	0	0
F2I7K0	Ribosome hibernation promoting factor OS=Aerococcus urinae (strain ACS-120-V-Col10a) GN=raiA PE=3 SV=1 - [F2I7K0_AERUA]	80	6	1	6	36.51	21.743	5.17334	36	44	0	0	0
K9EFD0	Tyrosine--tRNA ligase OS=Actinobaculum massiliense ACS-171-V-Col2 OX=883066 GN=tyrS PE=3 SV=1 - [K9EFD0_9ACTO]	80	10	1	10	35.14	46.8528	5.12256	17	4	14	0	45
K9EGV9	Uncharacterized protein OS=Actinobaculum massiliense ACS-171-V-Col2 OX=883066 GN=HMPREF9233_00912 PE=4 SV=1 - [K9EGV9_9ACTO]	80	13	1	13	38.88	56.4602	5.09717	58	18	4	0	0
K9F397	Putative N-acetylmannosamine-6-phosphate 2-epimerase OS=Actinobaculum massiliense ACS-171-V-Col2 OX=883066 GN=nanE PE=3 SV=1 - [K9F397_9ACTO]	80	9	1	9	64	23.594	5.2749	10	0	5	0	65
B4F2C3	Polyribonucleotide nucleotidyltransferase OS=Proteus mirabilis (strain HI4320) OX=529507 GN=pnp PE=3 SV=1 - [PNP_PROMH]	79	15	1	11	29.2	76.8208	5.09717	29	0	35	15	0
B4EU52	Trigger factor OS=Proteus mirabilis (strain HI4320) OX=529507 GN=tig PE=3 SV=1 - [TIG_PROMH]	79	12	1	12	34.33	48.827	4.76709	41	3	26	9	0
F2I563	ABC transporter, ATP-binding protein OS=Aerococcus urinae (strain ACS-120-V-Col10a) GN=HMPREF9243_1223 PE=4 SV=1 - [F2I563_AERUA]	79	8	1	8	52.05	26.9516	4.71631	41	38	0	0	0
F2I5L7	DJ-1 family protein OS=Aerococcus urinae (strain ACS-120-V-Col10a) GN=HMPREF9243_0057 PE=4 SV=1 - [F2I5L7_AERUA]	79	5	1	5	30.05	21.1229	4.58936	39	40	0	0	0
K9EVD2	Biotin-[acetyl-CoA-carboxylase] ligase OS=Actinobaculum massiliense ACS-171-V-Col2 OX=883066 GN=HMPREF9233_01361 PE=4 SV=1 - [K9EVD2_9ACTO]	79	7	1	7	43.75	28.3287	5.16064	15	4	12	1	47
B4F2D6	2,3,4,5-tetrahydropyridine-2,6-dicarboxylate N-succinyltransferase OS=Proteus mirabilis (strain HI4320) OX=529507 GN=dapD PE=3 SV=1 - [DAPD_PROMH]	78	9	1	5	48.54	29.9384	6.56592	24	2	23	29	0
K9EH19	Protein translocase subunit SecD OS=Actinobaculum massiliense ACS-171-V-Col2 OX=883066 GN=secD PE=3 SV=1 - [K9EH19_9ACTO]	78	7	1	7	19.56	75.4246	4.729	6	0	5	0	67
K9EI69	1,4-alpha-glucan branching enzyme GlgB OS=Actinobaculum massiliense ACS-171-V-Col2 OX=883066 GN=glgB PE=3 SV=1 - [K9EI69_9ACTO]	78	17	1	16	31.94	86.0096	4.83057	6	0	20	0	52
Q1RBC0	Pyruvate kinase OS=Escherichia coli (strain UTI89 / UPEC) GN=pykF PE=3 SV=1 - [Q1RBC0_ECOUT]	77	9	1	5	27.12	58.6645	7.10791	24	8	12	33	0
B4F2D2	Elongation factor Ts OS=Proteus mirabilis (strain HI4320) OX=529507 GN=tsf PE=3 SV=1 - [EFTS_PROMH]	77	10	1	8	45.58	30.3717	5.2876	22	9	21	25	0
B4ETU3	Alkyl hydroperoxide reductase subunit C OS=Proteus mirabilis (strain HI4320) OX=529507 GN=ahpC PE=4 SV=1 - [B4ETU3_PROMH]	77	8	1	7	62.57	20.6843	5.16064	51	26	0	0	0
K9EUY7	30S ribosomal protein S10 OS=Actinobaculum massiliense ACS-171-V-Col2 OX=883066 GN=rpsJ PE=3 SV=1 - [K9EUY7_9ACTO]	77	5	1	5	45.1	11.6664	9.64209	33	9	13	5	17
Q82ZZ9	Peptidyl-prolyl cis-trans isomerase OS=Enterococcus faecalis (strain ATCC 700802 / V583) GN=EF_2898 PE=3 SV=1 - [Q82ZZ9_ENTFA]	77	8	1	8	62.76	21.5415	4.57666	0	0	37	40	0
Q831C2	Mannose-6-phosphate isomerase, class I OS=Enterococcus faecalis (strain ATCC 700802 / V583) GN=manA PE=3 SV=1 - [Q831C2_ENTFA]	77	12	1	12	55.73	36.2013	5.021	0	0	75	2	0
Q831N1	Arginine--tRNA ligase OS=Enterococcus faecalis (strain ATCC 700802 / V583) GN=argS PE=3 SV=1 - [SYR_ENTFA]	76	17	1	16	44.94	64.1139	5.26221	3	0	73	0	0
B4EUD2	Pantothenate synthetase OS=Proteus mirabilis (strain HI4320) OX=529507 GN=panC PE=3 SV=1 - [PANC_PROMH]	76	7	1	7	33.57	31.7456	5.90967	25	8	20	23	0
B4EXW0	Uncharacterized protein OS=Proteus mirabilis (strain HI4320) OX=529507 GN=PMI1527 PE=4 SV=1 - [B4EXW0_PROMH]	76	9	1	9	60	27.4107	5.5542	54	9	13	0	0
B4EXS1	DNA-binding protein OS=Proteus mirabilis (strain HI4320) OX=529507 GN=hns PE=3 SV=1 - [B4EXS1_PROMH]	76	5	1	4	50	15.2399	5.04639	26	15	22	13	0
B4EVA1	L-asparaginase II OS=Proteus mirabilis (strain HI4320) OX=529507 GN=ansB PE=3 SV=1 - [B4EVA1_PROMH]	76	10	1	10	48.7	36.5318	6.25244	17	5	38	16	0
K9ECP8	Uncharacterized protein OS=Actinobaculum massiliense ACS-171-V-Col2 OX=883066 GN=HMPREF9233_01182 PE=3 SV=1 - [K9ECP8_9ACTO]	76	4	1	4	16.1	35.7462	9.5542	24	18	10	0	24
Q82YW2	Citrate lyase, beta subunit OS=Enterococcus faecalis (strain ATCC 700802 / V583) GN=citE PE=3 SV=1 - [Q82YW2_ENTFA]	76	12	1	12	63.39	31.9827	4.90674	0	0	65	11	0
B4EZR8	PTS family enzyme IIA component OS=Proteus mirabilis (strain HI4320) OX=529507 GN=crr PE=4 SV=1 - [B4EZR8_PROMH]	75	7	1	7	62.72	18.0636	4.79248	16	5	35	19	0
F2I5A9	Orotidine 5'-phosphate decarboxylase OS=Aerococcus urinae (strain ACS-120-V-Col10a) GN=pyrF PE=3 SV=1 - [F2I5A9_AERUA]	75	5	1	5	38.53	25.7261	5.45264	61	14	0	0	0
F2I6R1	Dihydrodipicolinate synthetase family OS=Aerococcus urinae (strain ACS-120-V-Col10a) GN=HMPREF9243_1634 PE=3 SV=1 - [F2I6R1_AERUA]	75	7	1	7	53.64	16.1127	7.56201	37	38	0	0	0
K9EFK5	50S ribosomal protein L20 OS=Actinobaculum massiliense ACS-171-V-Col2 OX=883066 GN=rplT PE=3 SV=1 - [K9EFK5_9ACTO]	75	5	1	5	53.54	14.7879	11.2095	31	1	5	0	38
Q1R7P2	Lactaldehyde reductase OS=Escherichia coli (strain UTI89 / UPEC) GN=fucO PE=4 SV=1 - [Q1R7P2_ECOUT]	74	10	1	10	36.03	40.7028	5.21143	19	42	0	13	0
Q838C9	L-lactate dehydrogenase 2 OS=Enterococcus faecalis (strain ATCC 700802 / V583) GN=ldh2 PE=3 SV=1 - [LDH2_ENTFA]	74	6	1	6	20.82	34.3468	4.95752	10	55	6	3	0
Q837W9	ATP-dependent Clp protease, ATP-binding subunit ClpE OS=Enterococcus faecalis (strain ATCC 700802 / V583) GN=clpE PE=3 SV=1 - [Q837W9_ENTFA]	74	15	1	13	26.13	82.9304	5.07178	7	6	46	15	0
Q82Z45	Dps family protein OS=Enterococcus faecalis (strain ATCC 700802 / V583) GN=EF_3233 PE=3 SV=1 - [Q82Z45_ENTFA]	74	5	1	5	43.23	17.8769	4.67822	9	22	38	5	0
Q836S2	Nucleoside diphosphate kinase OS=Enterococcus faecalis (strain ATCC 700802 / V583) GN=EF_1036 PE=3 SV=1 - [Q836S2_ENTFA]	74	7	1	7	47.37	14.946	7.56201	3	3	45	23	0
B4F2D3	30S ribosomal protein S2 OS=Proteus mirabilis (strain HI4320) OX=529507 GN=rpsB PE=3 SV=1 - [RS2_PROMH]	74	10	1	7	51.45	26.7779	7.13721	31	4	19	20	0
B4ESS4	Tol-Pal system protein TolB OS=Proteus mirabilis (strain HI4320) OX=529507 GN=tolB PE=3 SV=1 - [B4ESS4_PROMH]	74	12	1	11	47.69	46.7106	6.06201	5	2	65	2	0
F2I4J4	L-lactate dehydrogenase OS=Aerococcus urinae (strain ACS-120-V-Col10a) GN=ldh PE=3 SV=1 - [F2I4J4_AERUA]	74	8	1	8	31.68	35.3578	4.71631	42	32	0	0	0
F2I875	SPFH/Band 7/PHB domain protein OS=Aerococcus urinae (strain ACS-120-V-Col10a) GN=HMPREF9243_1892 PE=4 SV=1 - [F2I875_AERUA]	74	8	1	8	28.28	37.2916	5.08447	19	55	0	0	0
K9F013	50S ribosomal protein L23 OS=Actinobaculum massiliense ACS-171-V-Col2 OX=883066 GN=rplW PE=3 SV=1 - [K9F013_9ACTO]	73	5	1	5	49.5	11.5002	9.70068	25	16	11	3	18
Q82YW5	Carboxylase, putative OS=Enterococcus faecalis (strain ATCC 700802 / V583) GN=EF_3317 PE=4 SV=1 - [Q82YW5_ENTFA]	73	14	1	14	30.32	51.9416	5.04639	0	2	57	14	0
Q836X1	Proline dipeptidase OS=Enterococcus faecalis (strain ATCC 700802 / V583) GN=pepQ-1 PE=3 SV=1 - [Q836X1_ENTFA]	73	11	1	11	44.35	38.9559	4.7417	0	0	71	2	0
B4EUZ1	Putative glycine betaine/L-proline ABC transporter, substrate-binding protein OS=Proteus mirabilis (strain HI4320) OX=529507 GN=proX PE=4 SV=1 - [B4EUZ1_PROMH]	72	11	1	11	42.3	36.6403	6.88818	28	18	26	0	0
B4EWI0	Outer membrane protein OS=Proteus mirabilis (strain HI4320) OX=529507 GN=ompW PE=4 SV=1 - [B4EWI0_PROMH]	72	2	1	2	13.62	23.3867	6.39209	10	0	15	47	0
K9F0E1	Uncharacterized protein OS=Actinobaculum massiliense ACS-171-V-Col2 OX=883066 GN=HMPREF9233_01379 PE=4 SV=1 - [K9F0E1_9ACTO]	72	3	1	3	58.18	5.81108	4.84326	21	11	16	16	8
Q1REI3	Peptidoglycan-associated lipoprotein OS=Escherichia coli (strain UTI89 / UPEC) GN=pal PE=3 SV=1 - [Q1REI3_ECOUT]	71	6	1	5	48.62	19.6687	6.80029	15	9	13	34	0
H7C713	Cell division protein DivIVA OS=Enterococcus faecalis (strain ATCC 700802 / V583) GN=divIVA PE=4 SV=1 - [H7C713_ENTFA]	71	8	1	8	45.92	26.6403	4.61475	5	1	30	35	0
B4F1J0	30S ribosomal protein S3 OS=Proteus mirabilis (strain HI4320) OX=529507 GN=rpsC PE=3 SV=1 - [B4F1J0_PROMH]	71	7	1	4	45.92	25.9011	10.2134	25	6	19	21	0
B4ESW7	Adenylosuccinate lyase OS=Proteus mirabilis (strain HI4320) OX=529507 GN=PMI0627 PE=3 SV=1 - [B4ESW7_PROMH]	71	14	1	14	41.54	50.9483	6.354	53	18	0	0	0
F2I7U0	PTS system, mannitol-specific IIC component OS=Aerococcus urinae (strain ACS-120-V-Col10a) GN=mtlA PE=4 SV=1 - [F2I7U0_AERUA]	71	4	1	4	12.29	63.692	5.35107	32	39	0	0	0
K9EYN1	Uridylate kinase OS=Actinobaculum massiliense ACS-171-V-Col2 OX=883066 GN=pyrH PE=3 SV=1 - [K9EYN1_9ACTO]	71	8	1	7	48.58	26.3656	5.32568	9	0	0	0	62
K9EX30	Branched-chain amino acid aminotransferase OS=Actinobaculum massiliense ACS-171-V-Col2 OX=883066 GN=HMPREF9233_00309 PE=4 SV=1 - [K9EX30_9ACTO]	71	9	1	9	35.36	41.0095	4.91943	18	12	15	2	24
K9EC63	30S ribosomal protein S11 OS=Actinobaculum massiliense ACS-171-V-Col2 OX=883066 GN=rpsK PE=3 SV=1 - [K9EC63_9ACTO]	71	5	1	5	62.12	14.0193	11.4585	17	1	4	0	49
K9F0S8	LPXTG-domain-containing protein cell wall anchor domain OS=Actinobaculum massiliense ACS-171-V-Col2 OX=883066 GN=HMPREF9233_00866 PE=4 SV=1 - [K9F0S8_9ACTO]	71	12	1	12	40.39	54.0588	6.75635	5	1	35	2	28
Q1RD62	Acyl carrier protein OS=Escherichia coli (strain UTI89 / UPEC) GN=acpP PE=3 SV=1 - [ACP_ECOUT]	70	2	1	2	32.05	8.63422	4.05615	31	7	14	18	0
Q834C4	General stress protein, putative OS=Enterococcus faecalis (strain ATCC 700802 / V583) GN=EF_1744 PE=4 SV=1 - [Q834C4_ENTFA]	70	8	1	8	55.9	20.5323	4.80518	5	6	30	29	0
B4F0U9	Aspartate-semialdehyde dehydrogenase OS=Proteus mirabilis (strain HI4320) OX=529507 GN=asd PE=3 SV=1 - [B4F0U9_PROMH]	70	11	1	8	52.45	40.4386	6.04932	26	7	18	19	0
F2I6N7	50S ribosomal protein L25 OS=Aerococcus urinae (strain ACS-120-V-Col10a) GN=rplY PE=3 SV=1 - [F2I6N7_AERUA]	70	5	1	5	30.48	22.6916	4.37354	37	33	0	0	0
K9EY37	Uncharacterized protein OS=Actinobaculum massiliense ACS-171-V-Col2 OX=883066 GN=HMPREF9233_00649 PE=4 SV=1 - [K9EY37_9ACTO]	70	10	1	10	49.86	38.8426	4.7417	62	7	0	0	1
K9EJT7	Valine--tRNA ligase OS=Actinobaculum massiliense ACS-171-V-Col2 OX=883066 GN=valS PE=3 SV=1 - [K9EJT7_9ACTO]	70	14	1	14	22.54	99.7138	5.18604	21	3	14	0	32
Q1R3Z9	Triosephosphate isomerase OS=Escherichia coli (strain UTI89 / UPEC) GN=tpiA PE=3 SV=1 - [TPIS_ECOUT]	69	8	1	6	50.98	26.9548	5.96045	6	0	21	42	0
Q1RBW5	Uncharacterized protein OS=Escherichia coli (strain UTI89 / UPEC) GN=yncE PE=4 SV=1 - [Q1RBW5_ECOUT]	69	7	1	7	26.35	38.5914	9.1001	36	21	5	7	0
K9EG18	Threonine synthase OS=Actinobaculum massiliense ACS-171-V-Col2 OX=883066 GN=HMPREF9233_00395 PE=3 SV=1 - [K9EG18_9ACTO]	69	9	1	9	31.97	38.1344	5.09717	9	2	17	6	35
K9EE06	50S ribosomal protein L9 OS=Actinobaculum massiliense ACS-171-V-Col2 OX=883066 GN=rplI PE=3 SV=1 - [K9EE06_9ACTO]	69	8	1	8	60.93	16.667	9.65674	30	10	3	3	23
Q1RAG5	Putative salicylate synthetase OS=Escherichia coli (strain UTI89 / UPEC) GN=ybtS PE=4 SV=1 - [Q1RAG5_ECOUT]	69	12	1	12	39.63	47.9575	5.90967	0	0	0	69	0
Q1RF62	Chaperone protein HtpG OS=Escherichia coli (strain UTI89 / UPEC) GN=htpG PE=3 SV=1 - [HTPG_ECOUT]	68	16	1	11	33.01	71.3924	5.21143	19	1	8	40	0
Q1RBF4	Outer membrane lipoprotein SlyB OS=Escherichia coli (strain UTI89 / UPEC) GN=slyB PE=4 SV=1 - [Q1RBF4_ECOUT]	68	5	1	5	47.74	15.618	8.83643	10	0	2	56	0
B4EWZ4	Glycerol dehydrogenase OS=Proteus mirabilis (strain HI4320) OX=529507 GN=gldA PE=4 SV=1 - [B4EWZ4_PROMH]	68	9	1	9	30.25	39.479	4.90674	7	2	39	20	0
B4EY66	NADP-dependent malic enzyme OS=Proteus mirabilis (strain HI4320) OX=529507 GN=maeB PE=4 SV=1 - [B4EY66_PROMH]	68	14	1	12	26.97	82.5442	5.78271	13	2	42	11	0
F2I792	50S ribosomal protein L11 OS=Aerococcus urinae (strain ACS-120-V-Col10a) GN=rplK PE=3 SV=1 - [F2I792_AERUA]	68	3	1	3	29.79	14.9618	8.08936	47	21	0	0	0
F2I5W9	V-type ATP synthase subunit I OS=Aerococcus urinae (strain ACS-120-V-Col10a) GN=HMPREF9243_1456 PE=3 SV=1 - [F2I5W9_AERUA]	68	7	1	7	14.76	75.0273	5.09717	37	31	0	0	0
F2I5A4	Meso-diaminopimelate D-dehydrogenase OS=Aerococcus urinae (strain ACS-120-V-Col10a) GN=HMPREF9243_1274 PE=3 SV=1 - [F2I5A4_AERUA]	68	7	1	7	30.34	35.4256	4.98291	31	37	0	0	0
F2I7T2	50S ribosomal protein L18 OS=Aerococcus urinae (strain ACS-120-V-Col10a) GN=rplR PE=3 SV=1 - [F2I7T2_AERUA]	68	3	1	3	42.98	13.1459	9.78857	35	33	0	0	0
K9EDT1	50S ribosomal protein L14 OS=Actinobaculum massiliense ACS-171-V-Col2 OX=883066 GN=rplN PE=3 SV=1 - [K9EDT1_9ACTO]	68	6	1	5	48.36	13.2882	10.0669	23	9	9	8	19
K9EH23	Probable transcriptional regulatory protein HMPREF9233_00021 OS=Actinobaculum massiliense ACS-171-V-Col2 OX=883066 GN=HMPREF9233_00021 PE=3 SV=1 - [K9EH23_9ACTO]	68	6	1	6	42.4	26.9134	4.69092	17	4	3	3	41
B4EZV5	Serine hydroxymethyltransferase OS=Proteus mirabilis (strain HI4320) OX=529507 GN=glyA PE=3 SV=1 - [GLYA_PROMH]	67	9	1	6	28.3	45.1979	6.60986	18	4	25	20	0
B4ESS5	Peptidoglycan-associated protein OS=Proteus mirabilis (strain HI4320) OX=529507 GN=pal PE=3 SV=1 - [B4ESS5_PROMH]	67	4	1	3	33.33	18.1183	6.32861	24	10	24	9	0
B4EVC1	Aminopeptidase N OS=Proteus mirabilis (strain HI4320) OX=529507 GN=pepN PE=4 SV=1 - [B4EVC1_PROMH]	67	11	1	11	18.48	98.8068	5.31299	16	1	35	15	0
F2I5T0	Cell division protein FtsA OS=Aerococcus urinae (strain ACS-120-V-Col10a) GN=ftsA PE=3 SV=1 - [F2I5T0_AERUA]	67	10	1	10	26.3	50.4155	4.65283	36	31	0	0	0
F2I482	V-type ATP synthase alpha chain OS=Aerococcus urinae (strain ACS-120-V-Col10a) GN=atpA PE=3 SV=1 - [F2I482_AERUA]	67	8	1	7	17.72	65.4688	4.93213	29	38	0	0	0
Q82ZL6	Glutamyl-aminopeptidase OS=Enterococcus faecalis (strain ATCC 700802 / V583) GN=pepA PE=3 SV=1 - [Q82ZL6_ENTFA]	67	10	1	10	37.43	39.1798	6.04932	0	1	61	5	0
Q839F2	50S ribosomal protein L5 OS=Enterococcus faecalis (strain ATCC 700802 / V583) GN=rplE PE=3 SV=1 - [RL5_ENTFA]	67	6	1	6	43.58	20.0807	9.30518	0	0	35	32	0
B4EUT1	Phosphoheptose isomerase OS=Proteus mirabilis (strain HI4320) OX=529507 GN=gmhA PE=3 SV=1 - [GMHA_PROMH]	66	6	1	5	38.02	20.8386	5.80811	18	5	24	19	0
B4EYV1	50S ribosomal protein L10 OS=Proteus mirabilis (strain HI4320) OX=529507 GN=rplJ PE=3 SV=1 - [RL10_PROMH]	66	5	1	3	38.18	17.6404	8.67529	19	7	17	23	0
B4F2Y7	Biopolymer transport protein OS=Proteus mirabilis (strain HI4320) OX=529507 GN=exbB PE=3 SV=1 - [B4F2Y7_PROMH]	66	6	1	6	20.54	35.1632	5.36377	23	1	13	29	0
F2I523	CoA transferase OS=Aerococcus urinae (strain ACS-120-V-Col10a) GN=HMPREF9243_1161 PE=3 SV=1 - [F2I523_AERUA]	66	11	1	11	34.86	57.1541	4.83057	40	26	0	0	0
K9EZF6	Uncharacterized protein OS=Actinobaculum massiliense ACS-171-V-Col2 OX=883066 GN=HMPREF9233_01567 PE=4 SV=1 - [K9EZF6_9ACTO]	66	5	1	5	38.94	23.1417	5.12256	32	13	11	0	10
K9EF62	Uncharacterized protein OS=Actinobaculum massiliense ACS-171-V-Col2 OX=883066 GN=HMPREF9233_01458 PE=4 SV=1 - [K9EF62_9ACTO]	66	8	1	8	52.74	25.8526	4.50049	28	3	3	2	30
K9F1Z0	ChvD family ATP-binding cassette protein OS=Actinobaculum massiliense ACS-171-V-Col2 OX=883066 GN=HMPREF9233_00277 PE=4 SV=1 - [K9F1Z0_9ACTO]	66	15	1	14	35.6	62.1469	5.09717	16	4	1	0	45
K9EIY7	Uncharacterized protein OS=Actinobaculum massiliense ACS-171-V-Col2 OX=883066 GN=HMPREF9233_00583 PE=4 SV=1 - [K9EIY7_9ACTO]	66	7	1	7	30.41	32.3176	7.53271	15	10	5	5	31
Q834X9	V-type ATP synthase alpha chain OS=Enterococcus faecalis (strain ATCC 700802 / V583) GN=atpA PE=3 SV=2 - [VATA_ENTFA]	66	8	1	7	16.36	65.028	4.7417	0	12	30	24	0
Q839I8	Basic membrane protein family OS=Enterococcus faecalis (strain ATCC 700802 / V583) GN=EF_0177 PE=4 SV=1 - [Q839I8_ENTFA]	66	11	1	10	42.94	37.7259	5.04639	0	1	37	28	0
Q830Q8	50S ribosomal protein L7/L12 OS=Enterococcus faecalis (strain ATCC 700802 / V583) GN=rplL PE=3 SV=1 - [RL7_ENTFA]	66	4	1	4	59.84	12.3886	4.48779	0	0	34	32	0
Q831U9	30S ribosomal protein S2 OS=Enterococcus faecalis (strain ATCC 700802 / V583) GN=rpsB PE=3 SV=1 - [RS2_ENTFA]	65	12	1	11	50.19	29.4441	5.07178	13	8	27	17	0
B4EYR8	Glucose-6-phosphate isomerase OS=Proteus mirabilis (strain HI4320) OX=529507 GN=pgi PE=3 SV=1 - [G6PI_PROMH]	65	12	1	9	30.29	61.5006	6.58057	8	2	23	32	0
B4F1U6	Ketol-acid reductoisomerase (NADP(+)) OS=Proteus mirabilis (strain HI4320) OX=529507 GN=ilvC PE=3 SV=1 - [ILVC_PROMH]	65	12	1	8	31.98	54.1021	5.23682	19	9	26	11	0
B4F1A5	S-adenosylmethionine synthase OS=Proteus mirabilis (strain HI4320) OX=529507 GN=metK PE=3 SV=1 - [METK_PROMH]	65	8	1	3	24.22	42.0342	5.24951	25	8	16	16	0
B4EZM3	Ferrous iron transport protein B OS=Proteus mirabilis (strain HI4320) OX=529507 GN=feoB PE=3 SV=1 - [B4EZM3_PROMH]	65	11	1	9	21.26	85.3544	6.48096	28	9	15	13	0
F2I5Z8	CoA-transferase family III protein OS=Aerococcus urinae (strain ACS-120-V-Col10a) GN=HMPREF9243_0120 PE=4 SV=1 - [F2I5Z8_AERUA]	65	6	1	6	16.31	45.9059	5.08447	36	29	0	0	0
F2I7R8	50S ribosomal protein L4 OS=Aerococcus urinae (strain ACS-120-V-Col10a) GN=rplD PE=3 SV=1 - [F2I7R8_AERUA]	65	6	1	6	29.47	22.9152	9.84717	31	34	0	0	0
F2I7R2	30S ribosomal protein S7 OS=Aerococcus urinae (strain ACS-120-V-Col10a) GN=rpsG PE=3 SV=1 - [F2I7R2_AERUA]	65	5	1	5	48.08	17.7492	10.0376	41	24	0	0	0
K9F3T3	Signal recognition particle receptor FtsY OS=Actinobaculum massiliense ACS-171-V-Col2 OX=883066 GN=ftsY PE=3 SV=1 - [K9F3T3_9ACTO]	65	8	1	8	34.13	40.4393	4.86865	10	0	0	0	55
H7C7A3	PTS system, IIB component OS=Enterococcus faecalis (strain ATCC 700802 / V583) GN=EF_0554 PE=4 SV=1 - [H7C7A3_ENTFA]	64	8	1	8	61.88	18.0275	7.25439	4	8	49	3	0
K9EZM5	Arginine deiminase OS=Actinobaculum massiliense ACS-171-V-Col2 OX=883066 GN=arcA PE=3 SV=1 - [K9EZM5_9ACTO]	64	7	1	7	20.44	44.7827	5.26221	23	35	0	1	5
K9EEY4	Uncharacterized protein OS=Actinobaculum massiliense ACS-171-V-Col2 OX=883066 GN=HMPREF9233_00994 PE=4 SV=1 - [K9EEY4_9ACTO]	64	7	1	7	32.67	43.5019	4.4751	11	0	3	2	48
Q831W7	Proline--tRNA ligase OS=Enterococcus faecalis (strain ATCC 700802 / V583) GN=proS PE=1 SV=1 - [SYP_ENTFA]	64	14	1	14	40.21	64.2264	4.85596	0	0	58	6	0
Q1R4F8	Thioredoxin 1 OS=Escherichia coli (strain UTI89 / UPEC) GN=trxA PE=4 SV=1 - [Q1R4F8_ECOUT]	63	4	1	3	36.11	15.9842	5.2876	12	8	5	38	0
B4F019	Universal stress protein OS=Proteus mirabilis (strain HI4320) OX=529507 GN=uspA PE=3 SV=1 - [B4F019_PROMH]	63	4	1	3	58.33	16.0551	4.91943	13	0	30	20	0
F2I6T3	Transaldolase OS=Aerococcus urinae (strain ACS-120-V-Col10a) GN=HMPREF9243_0304 PE=4 SV=1 - [F2I6T3_AERUA]	63	5	1	5	27.35	24.2788	5.10986	41	22	0	0	0
F2I793	50S ribosomal protein L1 OS=Aerococcus urinae (strain ACS-120-V-Col10a) GN=rplA PE=3 SV=1 - [F2I793_AERUA]	63	6	1	6	33.91	25.3181	6.62451	37	26	0	0	0
Q82Z09	Glutathione reductase OS=Enterococcus faecalis (strain ATCC 700802 / V583) GN=gor PE=1 SV=1 - [Q82Z09_ENTFA]	63	13	1	13	45.43	49.3357	5.36377	0	0	42	21	0
K9EYK6	Ribonuclease J OS=Actinobaculum massiliense ACS-171-V-Col2 OX=883066 GN=rnj PE=3 SV=1 - [K9EYK6_9ACTO]	63	9	1	9	26.57	60.292	5.31299	0	0	1	0	62
K9ECN3	Uncharacterized protein OS=Actinobaculum massiliense ACS-171-V-Col2 OX=883066 GN=HMPREF9233_01167 PE=4 SV=1 - [K9ECN3_9ACTO]	63	7	1	7	50	28.4573	5.71924	0	0	0	0	63
F2I826	50S ribosomal protein L13 OS=Aerococcus urinae (strain ACS-120-V-Col10a) GN=rplM PE=3 SV=1 - [F2I826_AERUA]	62	5	1	5	49.66	16.4767	9.65674	37	25	0	0	0
K9EJP5	Translation initiation factor IF-2 OS=Actinobaculum massiliense ACS-171-V-Col2 OX=883066 GN=infB PE=3 SV=1 - [K9EJP5_9ACTO]	62	15	1	15	21.72	102.84	7.18115	19	7	2	0	34
K9EUZ6	30S ribosomal protein S19 OS=Actinobaculum massiliense ACS-171-V-Col2 OX=883066 GN=rpsS PE=3 SV=1 - [K9EUZ6_9ACTO]	62	4	1	4	46.24	10.8247	10.521	19	9	14	2	18
K9ECD5	Probable cytosol aminopeptidase OS=Actinobaculum massiliense ACS-171-V-Col2 OX=883066 GN=pepA PE=3 SV=1 - [K9ECD5_9ACTO]	62	10	1	10	32.99	49.2474	5.24951	12	0	17	0	33
K9F3U7	Uncharacterized protein OS=Actinobaculum massiliense ACS-171-V-Col2 OX=883066 GN=HMPREF9233_00243 PE=4 SV=1 - [K9F3U7_9ACTO]	62	12	1	12	29.24	66.3294	6.39209	32	5	5	1	19
K9EE31	Uncharacterized protein OS=Actinobaculum massiliense ACS-171-V-Col2 OX=883066 GN=HMPREF9233_01362 PE=4 SV=1 - [K9EE31_9ACTO]	62	15	1	15	40.66	66.4218	5.24951	13	0	1	0	48
K9EUE3	Uncharacterized protein OS=Actinobaculum massiliense ACS-171-V-Col2 OX=883066 GN=HMPREF9233_01554 PE=4 SV=1 - [K9EUE3_9ACTO]	62	5	1	5	28.62	30.7922	5.37646	8	1	0	0	53
K9EFE5	Phosphoenolpyruvate carboxylase OS=Actinobaculum massiliense ACS-171-V-Col2 OX=883066 GN=ppc PE=3 SV=1 - [K9EFE5_9ACTO]	62	18	1	18	32.08	104.671	5.74463	10	0	0	1	51
B4F2Z2	2,5-diketo-D-gluconic acid reductase A OS=Proteus mirabilis (strain HI4320) OX=529507 GN=dkgA PE=4 SV=1 - [B4F2Z2_PROMH]	62	12	1	10	68.48	31.3764	5.77002	0	4	55	3	0
Q838N8	Pyrrolidone-carboxylate peptidase OS=Enterococcus faecalis (strain ATCC 700802 / V583) GN=pcp PE=3 SV=1 - [PCP_ENTFA]	62	8	1	8	56.81	22.9226	5.0083	0	0	56	6	0
F2I5D9	30S ribosomal protein S6 OS=Aerococcus urinae (strain ACS-120-V-Col10a) GN=rpsF PE=3 SV=1 - [F2I5D9_AERUA]	61	3	1	3	45	11.6348	4.80518	36	25	0	0	0
F2I6Q4	ABC transporter, substrate-binding protein, family 5 OS=Aerococcus urinae (strain ACS-120-V-Col10a) GN=HMPREF9243_1627 PE=4 SV=1 - [F2I6Q4_AERUA]	61	8	1	5	14.92	60.1802	4.90674	28	33	0	0	0
Q839C1	L-lactate dehydrogenase 1 OS=Enterococcus faecalis (strain ATCC 700802 / V583) GN=ldh1 PE=3 SV=1 - [LDH1_ENTFA]	61	8	1	8	29.36	35.4652	4.89404	0	7	25	29	0
B4EWA4	Deoxyribose-phosphate aldolase OS=Proteus mirabilis (strain HI4320) OX=529507 GN=deoC PE=3 SV=1 - [DEOC_PROMH]	60	8	1	7	43.24	27.6132	5.50342	15	10	16	19	0
B4F168	Cell division protein ZapB OS=Proteus mirabilis (strain HI4320) OX=529507 GN=zapB PE=3 SV=1 - [ZAPB_PROMH]	60	2	2	2	38.75	9.41676	4.55127	48	9	3	0	0
B4EZ73	Putative endoribonuclease OS=Proteus mirabilis (strain HI4320) OX=529507 GN=PMI2833 PE=4 SV=1 - [B4EZ73_PROMH]	60	4	1	4	44.85	17.9502	6.56592	2	6	49	3	0
F2I7S5	50S ribosomal protein L29 OS=Aerococcus urinae (strain ACS-120-V-Col10a) GN=rpmC PE=3 SV=1 - [F2I7S5_AERUA]	60	2	1	1	35.94	7.51609	9.77393	21	32	0	7	0
K9EDW4	Phosphoglucosamine mutase OS=Actinobaculum massiliense ACS-171-V-Col2 OX=883066 GN=glmM PE=3 SV=1 - [K9EDW4_9ACTO]	60	9	1	9	27.62	47.0171	4.90674	17	5	4	3	31
K9EFY2	Uncharacterized protein OS=Actinobaculum massiliense ACS-171-V-Col2 OX=883066 GN=HMPREF9233_00350 PE=4 SV=1 - [K9EFY2_9ACTO]	60	6	1	6	40.49	18.2532	4.90674	7	1	8	4	40
Q838H7	Ribonucleoside-diphosphate reductase OS=Enterococcus faecalis (strain ATCC 700802 / V583) GN=nrdE PE=3 SV=1 - [Q838H7_ENTFA]	60	16	1	16	30.04	82.1059	5.24951	0	1	47	12	0
Q836Z4	Phosphotransacetylase OS=Enterococcus faecalis (strain ATCC 700802 / V583) GN=pta PE=4 SV=1 - [Q836Z4_ENTFA]	60	13	1	13	50.46	35.5364	5.05908	0	0	57	3	0
Q839L8	Surface exclusion protein, putative OS=Enterococcus faecalis (strain ATCC 700802 / V583) GN=EF_0146 PE=4 SV=1 - [Q839L8_ENTFA]	60	9	1	4	12.76	98.912	5.73193	0	0	27	33	0
Q1R8V3	PTS system, glucose-specific IIA component OS=Escherichia coli (strain UTI89 / UPEC) GN=crr PE=4 SV=1 - [Q1R8V3_ECOUT]	59	5	1	5	41.42	18.2397	4.84326	19	17	5	18	0
B4EY80	Putative peroxiredoxin (Bacterioferritin comigratory protein) OS=Proteus mirabilis (strain HI4320) OX=529507 GN=bcp PE=4 SV=1 - [B4EY80_PROMH]	59	6	1	6	46.79	17.5867	5.77002	7	6	45	1	0
F2I7S0	50S ribosomal protein L2 OS=Aerococcus urinae (strain ACS-120-V-Col10a) GN=rplB PE=3 SV=1 - [F2I7S0_AERUA]	59	7	1	7	32.37	30.3334	10.8872	32	27	0	0	0
K9EDV1	30S ribosomal protein S13 OS=Actinobaculum massiliense ACS-171-V-Col2 OX=883066 GN=rpsM PE=3 SV=1 - [K9EDV1_9ACTO]	59	7	1	7	64.23	14.0245	10.5942	32	9	1	2	15
K9F0X4	D-xylose ABC transporter, D-xylose-binding protein OS=Actinobaculum massiliense ACS-171-V-Col2 OX=883066 GN=HMPREF9233_00911 PE=4 SV=1 - [K9F0X4_9ACTO]	59	6	1	6	24.6	40.5983	4.84326	33	12	11	3	0
K9EJQ5	Ribosome-recycling factor OS=Actinobaculum massiliense ACS-171-V-Col2 OX=883066 GN=frr PE=3 SV=1 - [K9EJQ5_9ACTO]	59	7	1	7	50.27	20.9438	5.16064	15	11	5	0	28
Q837W3	Trigger factor OS=Enterococcus faecalis (strain ATCC 700802 / V583) GN=tig PE=3 SV=1 - [TIG_ENTFA]	59	11	1	11	37.7	47.9149	4.52588	0	0	37	22	0
Q1RBI1	Beta-glucuronidase OS=Escherichia coli (strain UTI89 / UPEC) GN=uidA PE=3 SV=1 - [Q1RBI1_ECOUT]	59	10	1	10	23.55	68.4057	5.45264	0	0	0	59	0
B4EUV6	Protein RecA OS=Proteus mirabilis (strain HI4320) OX=529507 GN=recA PE=3 SV=1 - [RECA_PROMH]	58	7	1	5	28.17	38.1955	5.31299	12	5	24	17	0
B4F1I7	50S ribosomal protein L2 OS=Proteus mirabilis (strain HI4320) OX=529507 GN=rplB PE=3 SV=1 - [RL2_PROMH]	58	10	1	7	39.78	30.0381	10.8726	20	9	18	11	0
B4F106	Cell division protein FtsZ OS=Proteus mirabilis (strain HI4320) OX=529507 GN=ftsZ PE=3 SV=1 - [B4F106_PROMH]	58	8	1	2	26.55	40.9837	4.75439	12	8	20	18	0
B4EZU1	Peptidase B OS=Proteus mirabilis (strain HI4320) OX=529507 GN=pepB PE=3 SV=1 - [B4EZU1_PROMH]	58	11	1	11	36.89	46.6788	6.354	13	0	18	27	0
F2I8X6	Putative N-acetylmannosamine-6-phosphate 2-epimerase OS=Aerococcus urinae (strain ACS-120-V-Col10a) GN=nanE PE=3 SV=1 - [F2I8X6_AERUA]	58	3	1	3	17.39	25.1158	4.71631	37	21	0	0	0
K9ECL1	Transcription elongation factor GreA OS=Actinobaculum massiliense ACS-171-V-Col2 OX=883066 GN=greA PE=3 SV=1 - [K9ECL1_9ACTO]	58	5	1	5	57.76	17.6	4.76709	5	3	1	0	49
Q839H5	NADH-dependent butanol dehydrogenase, putative OS=Enterococcus faecalis (strain ATCC 700802 / V583) GN=EF_0194 PE=4 SV=1 - [Q839H5_ENTFA]	58	12	1	12	44.3	43.0196	4.79248	0	1	49	8	0
Q1R6Q9	Uncharacterized protein OS=Escherichia coli (strain UTI89 / UPEC) GN=yqjI PE=4 SV=1 - [Q1R6Q9_ECOUT]	57	4	1	4	32.85	23.4266	6.69775	29	28	0	0	0
B4EVU2	Pyruvate kinase OS=Proteus mirabilis (strain HI4320) OX=529507 GN=pykA PE=3 SV=1 - [B4EVU2_PROMH]	57	11	1	7	30.21	51.6007	6.66846	21	4	22	10	0
K9EG21	Arginine--tRNA ligase OS=Actinobaculum massiliense ACS-171-V-Col2 OX=883066 GN=argS PE=3 SV=1 - [K9EG21_9ACTO]	57	15	1	15	38.39	61.2399	5.24951	16	0	11	0	30
K9EG68	30S ribosomal protein S9 OS=Actinobaculum massiliense ACS-171-V-Col2 OX=883066 GN=rpsI PE=3 SV=1 - [K9EG68_9ACTO]	57	4	1	4	38.65	17.7644	9.92041	20	9	8	4	16
K9F033	30S ribosomal protein S5 OS=Actinobaculum massiliense ACS-171-V-Col2 OX=883066 GN=rpsE PE=3 SV=1 - [K9F033_9ACTO]	57	6	1	6	36.51	25.7586	9.96436	9	10	8	3	27
K9EGR2	Uncharacterized protein OS=Actinobaculum massiliense ACS-171-V-Col2 OX=883066 GN=HMPREF9233_00857 PE=4 SV=1 - [K9EGR2_9ACTO]	57	10	1	9	43.9	35.5577	4.7417	11	0	0	0	46
K9F210	CRISPR-associated protein cas7/cse4/casc, subtype I-e OS=Actinobaculum massiliense ACS-171-V-Col2 OX=883066 GN=HMPREF9233_00302 PE=4 SV=1 - [K9F210_9ACTO]	57	10	1	10	36.58	41.5991	5.07178	18	1	6	1	31
K9EI71	DivIVA domain-containing protein OS=Actinobaculum massiliense ACS-171-V-Col2 OX=883066 GN=HMPREF9233_00373 PE=4 SV=1 - [K9EI71_9ACTO]	57	14	1	14	44.96	46.9635	4.69092	21	0	1	0	35
K9EHE0	Uncharacterized protein OS=Actinobaculum massiliense ACS-171-V-Col2 OX=883066 GN=HMPREF9233_01042 PE=4 SV=1 - [K9EHE0_9ACTO]	57	12	1	12	46.98	41.1607	5.05908	2	1	3	0	51
Q835G2	Glutamate dehydrogenase OS=Enterococcus faecalis (strain ATCC 700802 / V583) GN=gdhA PE=3 SV=1 - [Q835G2_ENTFA]	57	10	1	8	33.04	49.2837	5.56689	0	8	34	15	0
Q831F9	Serine hydroxymethyltransferase OS=Enterococcus faecalis (strain ATCC 700802 / V583) GN=glyA PE=3 SV=1 - [GLYA_ENTFA]	57	16	2	15	48.54	44.5109	5.70654	0	0	52	5	0
Q831P4	Pyruvate carboxylase OS=Enterococcus faecalis (strain ATCC 700802 / V583) GN=pycA PE=4 SV=1 - [Q831P4_ENTFA]	57	19	2	19	23.73	127.423	5.65576	0	0	55	2	0
B4EVG5	Isocitrate dehydrogenase [NADP] OS=Proteus mirabilis (strain HI4320) OX=529507 GN=icd PE=4 SV=1 - [B4EVG5_PROMH]	56	7	1	7	20.86	45.7175	5.21143	23	3	27	3	0
K9EFJ1	Phenylalanine--tRNA ligase beta subunit OS=Actinobaculum massiliense ACS-171-V-Col2 OX=883066 GN=pheT PE=3 SV=1 - [K9EFJ1_9ACTO]	56	18	1	18	29.89	92.5546	5.03369	12	0	2	2	40
K9EF81	Leucine--tRNA ligase OS=Actinobaculum massiliense ACS-171-V-Col2 OX=883066 GN=leuS PE=3 SV=1 - [K9EF81_9ACTO]	56	14	1	14	21.36	108.743	4.93213	12	0	6	1	37
Q1R4I1	D-ribose-binding periplasmic protein OS=Escherichia coli (strain UTI89 / UPEC) GN=rbsB PE=4 SV=1 - [Q1R4I1_ECOUT]	56	7	1	7	33.56	31.1644	7.47412	0	0	9	47	0
Q834K4	ATP-dependent protease ATPase subunit HslU OS=Enterococcus faecalis (strain ATCC 700802 / V583) GN=hslU PE=3 SV=1 - [HSLU_ENTFA]	56	9	1	8	26.55	52.8027	5.19873	0	0	23	33	0
Q838Y1	Aminopeptidase C OS=Enterococcus faecalis (strain ATCC 700802 / V583) GN=pepC PE=4 SV=1 - [Q838Y1_ENTFA]	56	7	1	7	22.99	52.1638	5.2749	0	0	49	7	0
Q1R3B7	10 kDa chaperonin OS=Escherichia coli (strain UTI89 / UPEC) GN=groS PE=3 SV=1 - [CH10_ECOUT]	55	4	1	3	52.58	10.3806	5.23682	10	5	0	40	0
Q834F7	NADPH-dependent FMN reductase domain protein OS=Enterococcus faecalis (strain ATCC 700802 / V583) GN=EF_1698 PE=4 SV=1 - [Q834F7_ENTFA]	55	4	1	4	52.5	17.5268	4.44971	4	0	44	7	0
Q836H3	Oxidoreductase, aldo/keto reductase family OS=Enterococcus faecalis (strain ATCC 700802 / V583) GN=EF_1138 PE=4 SV=1 - [Q836H3_ENTFA]	55	11	1	10	54.01	31.0471	5.42725	2	0	52	1	0
B4EWA1	Purine nucleoside phosphorylase DeoD-type OS=Proteus mirabilis (strain HI4320) OX=529507 GN=deoD PE=3 SV=1 - [DEOD_PROMH]	55	9	1	7	52.52	25.9161	5.04639	11	8	14	22	0
B4F015	Oligopeptidase A OS=Proteus mirabilis (strain HI4320) OX=529507 GN=prlC PE=3 SV=1 - [B4F015_PROMH]	55	10	1	9	19.26	76.8282	5.65576	16	1	33	5	0
B4EXM4	Probable aminohydrolase OS=Proteus mirabilis (strain HI4320) OX=529507 GN=PMI3674 PE=4 SV=1 - [B4EXM4_PROMH]	55	7	1	7	25.65	45.8119	6.0874	15	0	32	8	0
B4EZ87	Dipeptide ABC transporter, substrate-binding protein OS=Proteus mirabilis (strain HI4320) OX=529507 GN=dppA PE=4 SV=1 - [B4EZ87_PROMH]	55	11	1	10	27.1	60.3721	6.56592	7	0	39	9	0
F2I5A8	Orotate phosphoribosyltransferase OS=Aerococcus urinae (strain ACS-120-V-Col10a) GN=pyrE PE=3 SV=1 - [F2I5A8_AERUA]	55	7	1	7	57.35	23.425	6.41748	26	29	0	0	0
F2I8D5	Aspartyl/glutamyl-tRNA(Asn/Gln) amidotransferase subunit B OS=Aerococcus urinae (strain ACS-120-V-Col10a) GN=gatB PE=3 SV=1 - [F2I8D5_AERUA]	55	8	1	8	23.53	54.2601	4.93213	39	16	0	0	0
K9F1Y4	Ribose 5-phosphate isomerase OS=Actinobaculum massiliense ACS-171-V-Col2 OX=883066 GN=HMPREF9233_00267 PE=4 SV=1 - [K9F1Y4_9ACTO]	55	7	1	7	55.33	16.5322	5.36377	13	5	6	0	31
K9F3C8	Glycogen debranching enzyme GlgX OS=Actinobaculum massiliense ACS-171-V-Col2 OX=883066 GN=HMPREF9233_00033 PE=3 SV=1 - [K9F3C8_9ACTO]	55	10	1	10	18.96	88.9555	4.67822	8	0	0	1	46
Q1RBL8	Starvation sensing protein RspA OS=Escherichia coli (strain UTI89 / UPEC) GN=rspA PE=3 SV=1 - [Q1RBL8_ECOUT]	54	5	1	3	16.14	47.3192	6.21436	25	29	0	0	0
H7C720	Adhesion lipoprotein OS=Enterococcus faecalis (strain ATCC 700802 / V583) GN=EF_0577 PE=3 SV=1 - [H7C720_ENTFA]	54	6	1	6	22.78	35.7162	5.43994	16	31	7	0	0
B4F297	Inorganic pyrophosphatase OS=Proteus mirabilis (strain HI4320) OX=529507 GN=ppa PE=3 SV=1 - [B4F297_PROMH]	54	7	1	5	41.71	19.611	5.17334	15	8	19	12	0
F2I5W6	ATP synthase, subunit C OS=Aerococcus urinae (strain ACS-120-V-Col10a) GN=HMPREF9243_1453 PE=4 SV=1 - [F2I5W6_AERUA]	54	5	1	5	21.76	39.0588	4.89404	29	25	0	0	0
F2I770	Glutamate--tRNA ligase OS=Aerococcus urinae (strain ACS-120-V-Col10a) GN=gltX PE=3 SV=1 - [F2I770_AERUA]	54	6	1	5	15.42	56.3671	5.10986	32	20	0	2	0
F2I5A6	Phosphate-specific transport system accessory protein PhoU OS=Aerococcus urinae (strain ACS-120-V-Col10a) GN=phoU PE=3 SV=1 - [F2I5A6_AERUA]	54	7	1	7	34.08	24.9137	4.79248	25	29	0	0	0
F2I827	30S ribosomal protein S9 OS=Aerococcus urinae (strain ACS-120-V-Col10a) GN=rpsI PE=3 SV=1 - [F2I827_AERUA]	54	4	1	3	53.85	14.3747	10.5356	31	23	0	0	0
F2I855	Glycine cleavage H-protein OS=Aerococcus urinae (strain ACS-120-V-Col10a) GN=HMPREF9243_0576 PE=4 SV=1 - [F2I855_AERUA]	54	3	1	3	34.55	12.3271	4.33545	27	27	0	0	0
F2I862	UDP-glucose 4-epimerase OS=Aerococcus urinae (strain ACS-120-V-Col10a) GN=galE PE=4 SV=1 - [F2I862_AERUA]	54	6	2	6	23.15	37.3894	4.81787	25	29	0	0	0
Q839P7	Endoribonuclease L-PSP, putative OS=Enterococcus faecalis (strain ATCC 700802 / V583) GN=EF_0115 PE=4 SV=1 - [Q839P7_ENTFA]	54	12	1	12	54.03	45.2824	5.71924	0	0	53	1	0
Q1R637	DNA-directed RNA polymerase subunit alpha OS=Escherichia coli (strain UTI89 / UPEC) GN=rpoA PE=3 SV=1 - [RPOA_ECOUT]	53	8	1	1	35.26	36.4892	5.05908	46	7	0	0	0
Q835J8	Alanine--tRNA ligase OS=Enterococcus faecalis (strain ATCC 700802 / V583) GN=alaS PE=3 SV=1 - [SYA_ENTFA]	53	15	1	14	28.3	97.8268	5.021	4	0	40	8	1
F2I4T3	Universal stress family protein OS=Aerococcus urinae (strain ACS-120-V-Col10a) GN=HMPREF9243_1059 PE=3 SV=1 - [F2I4T3_AERUA]	53	5	1	5	47.18	16.0204	5.59229	22	31	0	0	0
K9EFX3	Isoleucine--tRNA ligase OS=Actinobaculum massiliense ACS-171-V-Col2 OX=883066 GN=ileS PE=3 SV=1 - [K9EFX3_9ACTO]	53	12	1	11	17.93	121.25	4.97021	22	5	0	0	26
K9F1I5	Uncharacterized protein OS=Actinobaculum massiliense ACS-171-V-Col2 OX=883066 GN=HMPREF9233_01081 PE=4 SV=1 - [K9F1I5_9ACTO]	53	18	1	18	17.27	162.744	4.84326	12	2	2	0	37
K9EFL5	Uncharacterized protein OS=Actinobaculum massiliense ACS-171-V-Col2 OX=883066 GN=HMPREF9233_00783 PE=4 SV=1 - [K9EFL5_9ACTO]	53	6	1	6	51.63	20.275	4.33545	11	3	1	0	38
Q1R624	50S ribosomal protein L6 OS=Escherichia coli (strain UTI89 / UPEC) GN=rplF PE=3 SV=1 - [RL6_ECOUT]	52	8	1	5	46.89	18.8922	9.70068	10	1	9	32	0
Q1R793	Transketolase OS=Escherichia coli (strain UTI89 / UPEC) GN=tktA PE=3 SV=1 - [Q1R793_ECOUT]	52	16	1	12	34.92	73.2796	5.88428	20	0	0	32	0
Q1R6B2	Stringent starvation protein A OS=Escherichia coli (strain UTI89 / UPEC) GN=sspA PE=3 SV=1 - [Q1R6B2_ECOUT]	52	4	1	1	23.11	24.2894	5.33838	17	7	0	28	0
P07515	Phosphocarrier protein HPr OS=Enterococcus faecalis (strain ATCC 700802 / V583) GN=ptsH PE=1 SV=2 - [PTHP_ENTFA]	52	2	1	2	54.55	9.31475	4.91943	7	8	6	31	0
B4ESJ1	N-acetylglucosamine-specific PTS system, EIICBA component OS=Proteus mirabilis (strain HI4320) OX=529507 GN=nagE PE=4 SV=1 - [B4ESJ1_PROMH]	52	8	1	8	19.24	72.7669	5.66846	15	0	24	13	0
B4EYH9	Putrescine-binding periplasmic protein OS=Proteus mirabilis (strain HI4320) OX=529507 GN=potD PE=3 SV=1 - [B4EYH9_PROMH]	52	10	2	10	37.46	38.7365	4.99561	1	5	36	10	0
F2I8M8	Receptor family ligand-binding protein OS=Aerococcus urinae (strain ACS-120-V-Col10a) GN=HMPREF9243_1977 PE=4 SV=1 - [F2I8M8_AERUA]	52	8	1	8	28.94	41.9418	4.81787	37	15	0	0	0
F2I6X5	Phosphoglucomutase/phosphomannomutase, alpha/beta/alpha domain II OS=Aerococcus urinae (strain ACS-120-V-Col10a) GN=HMPREF9243_0351 PE=4 SV=1 - [F2I6X5_AERUA]	52	12	1	12	24.61	64.1559	4.7417	37	15	0	0	0
K9EEB5	Alpha-1,4-glucan:maltose-1-phosphate maltosyltransferase OS=Actinobaculum massiliense ACS-171-V-Col2 OX=883066 GN=glgE PE=3 SV=1 - [K9EEB5_9ACTO]	52	11	1	11	21.65	85.2795	5.96045	6	0	0	0	46
K9EU91	Uncharacterized protein OS=Actinobaculum massiliense ACS-171-V-Col2 OX=883066 GN=HMPREF9233_01489 PE=4 SV=1 - [K9EU91_9ACTO]	52	10	1	10	58.88	34.0508	7.26904	6	1	13	1	31
K9EEC9	ATP synthase gamma chain OS=Actinobaculum massiliense ACS-171-V-Col2 OX=883066 GN=atpG PE=3 SV=1 - [K9EEC9_9ACTO]	52	11	1	11	51.45	34.1067	9.05615	8	4	2	0	38
K9EE13	Phosphomethylpyrimidine kinase OS=Actinobaculum massiliense ACS-171-V-Col2 OX=883066 GN=HMPREF9233_00814 PE=4 SV=1 - [K9EE13_9ACTO]	52	6	1	6	38.2	28.3543	4.7417	25	5	2	0	20
B4EZN9	Putative exported protein OS=Proteus mirabilis (strain HI4320) OX=529507 GN=PMI2937 PE=4 SV=1 - [B4EZN9_PROMH]	52	13	1	13	54.85	35.3535	8.5874	0	1	40	11	0
Q1RG19	Elongation factor Ts OS=Escherichia coli (strain UTI89 / UPEC) GN=tsf PE=3 SV=1 - [EFTS_ECOUT]	51	9	1	7	35.69	30.4038	5.2876	14	16	0	21	0
Q837R1	Uncharacterized protein OS=Enterococcus faecalis (strain ATCC 700802 / V583) GN=EF_0770 PE=1 SV=1 - [Q837R1_ENTFA]	51	6	1	6	50	19.4969	4.90674	2	0	40	9	0
Q835Q8	N-acetylglucosamine-6-phosphate deacetylase OS=Enterococcus faecalis (strain ATCC 700802 / V583) GN=nagA-1 PE=3 SV=1 - [Q835Q8_ENTFA]	51	7	1	7	31.68	41.3315	4.90674	1	9	31	10	0
Q82ZE6	DAK2 domain protein OS=Enterococcus faecalis (strain ATCC 700802 / V583) GN=EF_3114 PE=4 SV=1 - [Q82ZE6_ENTFA]	51	12	1	11	33.51	60.2262	4.60205	3	5	38	5	0
Q838D6	Decarboxylase, putative OS=Enterococcus faecalis (strain ATCC 700802 / V583) GN=EF_0634 PE=4 SV=1 - [Q838D6_ENTFA]	51	9	1	9	25.16	71.9578	5.31299	9	42	0	0	0
B4EW72	Tellurite resistance protein OS=Proteus mirabilis (strain HI4320) OX=529507 GN=terD PE=4 SV=1 - [B4EW72_PROMH]	51	7	1	7	45.83	20.6052	4.94482	4	0	39	8	0
F2I795	50S ribosomal protein L7/L12 OS=Aerococcus urinae (strain ACS-120-V-Col10a) GN=rplL PE=3 SV=1 - [F2I795_AERUA]	51	4	1	4	38.21	12.4727	4.41162	44	7	0	0	0
F2I7S2	50S ribosomal protein L22 OS=Aerococcus urinae (strain ACS-120-V-Col10a) GN=rplV PE=3 SV=1 - [F2I7S2_AERUA]	51	5	1	5	50.85	12.8991	10.0522	33	18	0	0	0
K9EGX9	Uncharacterized protein OS=Actinobaculum massiliense ACS-171-V-Col2 OX=883066 GN=HMPREF9233_00660 PE=3 SV=1 - [K9EGX9_9ACTO]	51	8	1	8	30.48	40.9057	5.32568	14	13	2	0	22
Q1R9X5	Uncharacterized protein OS=Escherichia coli (strain UTI89 / UPEC) GN=UTI89_C2371 PE=4 SV=1 - [Q1R9X5_ECOUT]	51	6	1	2	21.12	40.8808	8.33838	0	0	24	27	0
Q839E9	50S ribosomal protein L6 OS=Enterococcus faecalis (strain ATCC 700802 / V583) GN=rplF PE=3 SV=1 - [RL6_ENTFA]	51	5	1	5	44.94	19.3972	9.62744	0	0	14	37	0
Q834X8	V-type ATP synthase beta chain OS=Enterococcus faecalis (strain ATCC 700802 / V583) GN=atpB PE=3 SV=1 - [VATB_ENTFA]	51	13	1	13	38.43	51.1953	5.10986	0	0	42	9	0
Q82Z92	Peptidase, M20/M25/M40 family OS=Enterococcus faecalis (strain ATCC 700802 / V583) GN=EF_3178 PE=4 SV=1 - [Q82Z92_ENTFA]	51	9	1	9	39.95	41.4369	4.84326	0	0	49	2	0
Q1R4X2	ADP-L-glycero-D-manno-heptose-6-epimerase OS=Escherichia coli (strain UTI89 / UPEC) GN=hldD PE=3 SV=1 - [HLDD_ECOUT]	50	8	1	4	31.29	34.8721	4.88135	13	0	0	37	0
B4EU55	Lon protease OS=Proteus mirabilis (strain HI4320) OX=529507 GN=lon PE=2 SV=1 - [B4EU55_PROMH]	50	12	1	8	19.52	87.6058	6.12549	12	6	21	11	0
B4EZD2	LysR-family transcriptional regulator OS=Proteus mirabilis (strain HI4320) OX=529507 GN=hexA PE=4 SV=1 - [B4EZD2_PROMH]	50	7	3	7	29.18	34.0815	5.21143	15	2	13	20	0
F2I4L4	Uncharacterized protein OS=Aerococcus urinae (strain ACS-120-V-Col10a) GN=HMPREF9243_0976 PE=4 SV=1 - [F2I4L4_AERUA]	50	3	1	3	32.5	13.7261	5.03369	34	16	0	0	0
F2I7T7	Adenylate kinase OS=Aerococcus urinae (strain ACS-120-V-Col10a) GN=adk PE=3 SV=1 - [F2I7T7_AERUA]	50	4	1	4	22.12	24.2241	4.90674	28	22	0	0	0
F2I7U8	Isoaspartyl dipeptidase OS=Aerococcus urinae (strain ACS-120-V-Col10a) GN=iadA PE=3 SV=1 - [F2I7U8_AERUA]	50	4	1	4	11.7	42.1278	5.0083	34	16	0	0	0
K9EIG2	Glucarate dehydratase OS=Actinobaculum massiliense ACS-171-V-Col2 OX=883066 GN=HMPREF9233_00458 PE=3 SV=1 - [K9EIG2_9ACTO]	50	9	1	9	30.56	49.2606	5.23682	30	0	0	0	20
K9EWK2	Uncharacterized protein OS=Actinobaculum massiliense ACS-171-V-Col2 OX=883066 GN=HMPREF9233_01093 PE=4 SV=1 - [K9EWK2_9ACTO]	50	8	1	8	36.71	33.84	4.58936	19	4	18	0	9
K9EW39	Serine--tRNA ligase OS=Actinobaculum massiliense ACS-171-V-Col2 OX=883066 GN=serS PE=3 SV=1 - [K9EW39_9ACTO]	50	10	1	10	32.62	47.3246	5.12256	21	0	1	0	28
Q836G0	Carboxypeptidase 1 OS=Enterococcus faecalis (strain ATCC 700802 / V583) GN=EF_1153 PE=3 SV=1 - [Q836G0_ENTFA]	50	12	1	12	39.16	57.6477	4.89404	0	0	49	1	0
B4F069	Colicin immunity protein OS=Proteus mirabilis (strain HI4320) OX=529507 GN=imm PE=4 SV=1 - [B4F069_PROMH]	50	3	1	3	40.54	12.5042	6.06201	0	0	31	19	0
K9EFY9	Glutaredoxin-like protein OS=Actinobaculum massiliense ACS-171-V-Col2 OX=883066 GN=HMPREF9233_00360 PE=4 SV=1 - [K9EFY9_9ACTO]	50	2	1	2	58.02	8.96439	4.75439	0	0	5	0	45
B4F1K1	30S ribosomal protein S5 OS=Proteus mirabilis (strain HI4320) OX=529507 GN=rpsE PE=3 SV=1 - [B4F1K1_PROMH]	49	6	1	6	43.37	17.5874	10.272	9	2	31	7	0
F2I6P9	ABC transporter, ATP-binding protein OS=Aerococcus urinae (strain ACS-120-V-Col10a) GN=HMPREF9243_1620 PE=3 SV=1 - [F2I6P9_AERUA]	49	9	3	8	40.48	41.0178	4.88135	36	11	0	0	2
F2I481	V-type ATP synthase beta chain OS=Aerococcus urinae (strain ACS-120-V-Col10a) GN=atpB PE=3 SV=1 - [F2I481_AERUA]	49	6	1	6	19.92	52.5124	4.86865	21	28	0	0	0
F2I496	Creatinase OS=Aerococcus urinae (strain ACS-120-V-Col10a) GN=HMPREF9243_0834 PE=3 SV=1 - [F2I496_AERUA]	49	7	1	7	29.53	39.8169	4.80518	38	11	0	0	0
F2I7L0	Putative catabolite control protein A OS=Aerococcus urinae (strain ACS-120-V-Col10a) GN=HMPREF9243_1804 PE=4 SV=1 - [F2I7L0_AERUA]	49	5	1	5	23.87	36.0715	4.98291	28	21	0	0	0
F2I7U1	Glucosamine-6-phosphate deaminase OS=Aerococcus urinae (strain ACS-120-V-Col10a) GN=nagB PE=3 SV=1 - [F2I7U1_AERUA]	49	5	1	5	33.05	26.1199	4.62744	35	14	0	0	0
K9EG63	50S ribosomal protein L17 OS=Actinobaculum massiliense ACS-171-V-Col2 OX=883066 GN=rplQ PE=3 SV=1 - [K9EG63_9ACTO]	49	4	1	4	22.46	20.5935	4.98291	16	3	5	0	25
K9EZ80	Uncharacterized protein OS=Actinobaculum massiliense ACS-171-V-Col2 OX=883066 GN=HMPREF9233_01487 PE=4 SV=1 - [K9EZ80_9ACTO]	49	3	1	3	30.14	16.1033	4.89404	6	3	6	0	34
K9EHY3	Uncharacterized protein OS=Actinobaculum massiliense ACS-171-V-Col2 OX=883066 GN=HMPREF9233_00811 PE=4 SV=1 - [K9EHY3_9ACTO]	49	10	1	10	38.57	43.4116	4.99561	4	1	7	0	37
Q839B1	ATP-dependent zinc metalloprotease FtsH OS=Enterococcus faecalis (strain ATCC 700802 / V583) GN=ftsH PE=3 SV=1 - [Q839B1_ENTFA]	49	11	1	11	21.03	79.4334	5.2876	0	1	41	7	0
Q836V0	Glucose-6-phosphate 1-dehydrogenase OS=Enterococcus faecalis (strain ATCC 700802 / V583) GN=zwf PE=3 SV=1 - [Q836V0_ENTFA]	49	11	1	11	34.12	58.61	4.99561	0	0	40	9	0
Q1R9S3	Galactose-binding transport protein OS=Escherichia coli (strain UTI89 / UPEC) GN=mglB PE=4 SV=1 - [Q1R9S3_ECOUT]	49	11	1	11	40.96	35.6904	6.02393	0	0	0	49	0
Q1R7P1	L-fuculose phosphate aldolase OS=Escherichia coli (strain UTI89 / UPEC) GN=fucA PE=3 SV=1 - [Q1R7P1_ECOUT]	48	6	1	6	39.07	23.7422	6.59521	16	6	4	22	0
Q1RCN1	Ribose-phosphate pyrophosphokinase OS=Escherichia coli (strain UTI89 / UPEC) GN=prsA PE=3 SV=1 - [Q1RCN1_ECOUT]	48	7	1	2	27.89	36.626	5.74463	19	2	0	27	0
B4EXC9	Elongation factor P OS=Proteus mirabilis (strain HI4320) OX=529507 GN=efp PE=3 SV=1 - [EFP_PROMH]	48	1	2	1	6.38	20.7066	4.97021	16	17	14	1	0
B4F278	50S ribosomal protein L9 OS=Proteus mirabilis (strain HI4320) OX=529507 GN=rplI PE=3 SV=1 - [RL9_PROMH]	48	6	1	3	42.95	15.7824	6.31592	18	7	9	14	0
B4F1U2	Branched-chain-amino-acid aminotransferase OS=Proteus mirabilis (strain HI4320) OX=529507 GN=ilvE PE=3 SV=1 - [B4F1U2_PROMH]	48	4	1	2	19.16	33.9031	6.07471	16	0	22	10	0
B4EU85	Peptidase T OS=Proteus mirabilis (strain HI4320) OX=529507 GN=pepT PE=3 SV=1 - [B4EU85_PROMH]	48	9	1	9	32.61	45.7289	5.21143	9	10	21	8	0
F2I7B1	ATP:cob(I)alamin adenosyltransferase OS=Aerococcus urinae (strain ACS-120-V-Col10a) GN=HMPREF9243_0416 PE=4 SV=1 - [F2I7B1_AERUA]	48	5	1	5	30.96	22.3703	5.21143	27	21	0	0	0
F2I587	Uncharacterized protein OS=Aerococcus urinae (strain ACS-120-V-Col10a) GN=HMPREF9243_1253 PE=4 SV=1 - [F2I587_AERUA]	48	3	1	3	57.95	9.90116	4.84326	37	11	0	0	0
K9EHG7	Transcription termination/antitermination protein NusA OS=Actinobaculum massiliense ACS-171-V-Col2 OX=883066 GN=nusA PE=3 SV=1 - [K9EHG7_9ACTO]	48	9	1	8	31.56	37.2792	5.30029	15	4	2	0	27
K9EVH1	Methionine--tRNA ligase OS=Actinobaculum massiliense ACS-171-V-Col2 OX=883066 GN=metG PE=3 SV=1 - [K9EVH1_9ACTO]	48	9	1	9	25.79	67.2264	4.89404	14	1	0	1	32
K9EIF5	Uncharacterized protein OS=Actinobaculum massiliense ACS-171-V-Col2 OX=883066 GN=HMPREF9233_00453 PE=4 SV=1 - [K9EIF5_9ACTO]	48	7	1	7	34.81	33.6076	5.32568	3	0	0	0	45
K9EV77	Uncharacterized protein OS=Actinobaculum massiliense ACS-171-V-Col2 OX=883066 GN=HMPREF9233_01321 PE=4 SV=1 - [K9EV77_9ACTO]	48	3	1	3	28.87	15.8502	5.63037	7	1	3	0	37
Q1RGD7	L-arabinose isomerase OS=Escherichia coli (strain UTI89 / UPEC) GN=araA PE=3 SV=1 - [ARAA_ECOUT]	47	9	1	9	29.8	56.0671	6.41748	17	9	0	21	0
B4F266	RNA-binding protein Hfq OS=Proteus mirabilis (strain HI4320) OX=529507 GN=hfq PE=3 SV=1 - [HFQ_PROMH]	47	4	2	4	37.5	10.5074	8.55811	8	7	26	6	0
B4F1J2	50S ribosomal protein L29 OS=Proteus mirabilis (strain HI4320) OX=529507 GN=rpmC PE=3 SV=1 - [RL29_PROMH]	47	2	2	2	46.03	7.26902	10.272	15	5	22	5	0
B4EY77	Outer membrane protein assembly factor BamC OS=Proteus mirabilis (strain HI4320) OX=529507 GN=nlpB PE=3 SV=1 - [B4EY77_PROMH]	47	10	1	10	39.94	37.7526	6.63916	21	1	17	8	0
B4F0C0	Superoxide dismutase OS=Proteus mirabilis (strain HI4320) OX=529507 GN=sodA PE=3 SV=1 - [B4F0C0_PROMH]	47	8	1	8	43.96	23.5388	6.69775	4	1	28	14	0
B4F1K6	30S ribosomal protein S13 OS=Proteus mirabilis (strain HI4320) OX=529507 GN=rpsM PE=3 SV=1 - [B4F1K6_PROMH]	47	5	1	4	49.15	13.3074	10.4917	13	3	14	17	0
F2I4L6	Acyl carrier protein OS=Aerococcus urinae (strain ACS-120-V-Col10a) GN=acpP PE=3 SV=1 - [F2I4L6_AERUA]	47	2	1	2	28	8.75606	3.73877	18	29	0	0	0
F2I5W8	V-type sodium ATPase, K subunit OS=Aerococcus urinae (strain ACS-120-V-Col10a) GN=ntpK PE=3 SV=1 - [F2I5W8_AERUA]	47	2	1	2	18.24	16.6799	4.89404	21	26	0	0	0
K9EHU4	ATP-dependent 6-phosphofructokinase OS=Actinobaculum massiliense ACS-171-V-Col2 OX=883066 GN=pfkA PE=3 SV=1 - [K9EHU4_9ACTO]	47	8	1	8	30.32	39.4164	6.20166	8	0	7	1	31
K9EF52	Uncharacterized protein OS=Actinobaculum massiliense ACS-171-V-Col2 OX=883066 GN=HMPREF9233_01443 PE=4 SV=1 - [K9EF52_9ACTO]	47	7	1	7	39.36	26.4524	4.93213	13	0	7	0	27
K9ECW0	Uncharacterized protein OS=Actinobaculum massiliense ACS-171-V-Col2 OX=883066 GN=HMPREF9233_00865 PE=4 SV=1 - [K9ECW0_9ACTO]	47	11	1	11	45.35	38.0013	5.07178	9	3	18	3	14
Q836U8	Oxidoreductase, Gfo/Idh/MocA family OS=Enterococcus faecalis (strain ATCC 700802 / V583) GN=EF_1008 PE=4 SV=1 - [Q836U8_ENTFA]	47	13	1	13	54.22	37.1396	4.99561	0	1	45	1	0
Q82Z40	DNA-directed RNA polymerase subunit beta OS=Enterococcus faecalis (strain ATCC 700802 / V583) GN=rpoB PE=3 SV=1 - [RPOB_ENTFA]	47	16	1	13	16.4	135.103	5.04639	0	0	39	8	0
Q836C4	DegV family protein OS=Enterococcus faecalis (strain ATCC 700802 / V583) GN=EF_1191 PE=4 SV=1 - [Q836C4_ENTFA]	47	10	1	10	48.25	31.1745	5.10986	0	0	44	3	0
B4EUK2	Fimbrial chaperone protein OS=Proteus mirabilis (strain HI4320) OX=529507 GN=mrpD PE=3 SV=1 - [B4EUK2_PROMH]	47	9	1	9	61.9	27.9414	8.95361	0	0	36	11	0
K9EGL5	Uncharacterized protein OS=Actinobaculum massiliense ACS-171-V-Col2 OX=883066 GN=HMPREF9233_01169 PE=4 SV=1 - [K9EGL5_9ACTO]	47	4	1	4	32.43	23.8981	4.70361	0	0	0	0	47
Q836R3	ATP-dependent 6-phosphofructokinase OS=Enterococcus faecalis (strain ATCC 700802 / V583) GN=pfkA PE=3 SV=1 - [PFKA_ENTFA]	46	5	3	3	18.13	34.3907	5.85889	5	0	15	26	0
Q839X7	PTS system, mannose-specific IID component OS=Enterococcus faecalis (strain ATCC 700802 / V583) GN=EF_0022 PE=4 SV=1 - [Q839X7_ENTFA]	46	6	1	6	25.08	33.3089	9.37842	4	1	19	22	0
B4EWJ8	Thiol peroxidase OS=Proteus mirabilis (strain HI4320) OX=529507 GN=tpx PE=3 SV=1 - [B4EWJ8_PROMH]	46	4	1	4	34.73	17.6261	5.03369	14	3	16	13	0
F2I505	Transcription termination/antitermination protein NusA OS=Aerococcus urinae (strain ACS-120-V-Col10a) GN=nusA PE=3 SV=1 - [F2I505_AERUA]	46	6	1	6	18.46	51.5222	4.32275	27	19	0	0	0
F2I5F8	DNA-binding protein HU OS=Aerococcus urinae (strain ACS-120-V-Col10a) GN=hup PE=3 SV=1 - [F2I5F8_AERUA]	46	1	1	1	15.22	9.8502	9.08545	18	28	0	0	0
K9EXA3	Diaminopimelate decarboxylase OS=Actinobaculum massiliense ACS-171-V-Col2 OX=883066 GN=lysA PE=3 SV=1 - [K9EXA3_9ACTO]	46	10	1	10	36.69	49.965	4.93213	2	0	4	0	40
K9EUV9	UPF0234 protein HMPREF9233_01246 OS=Actinobaculum massiliense ACS-171-V-Col2 OX=883066 GN=HMPREF9233_01246 PE=3 SV=1 - [K9EUV9_9ACTO]	46	5	1	5	34.76	18.4416	8.89502	13	6	12	0	15
K9EFY4	ATP-dependent Clp protease proteolytic subunit OS=Actinobaculum massiliense ACS-171-V-Col2 OX=883066 GN=clpP PE=3 SV=1 - [K9EFY4_9ACTO]	46	6	1	6	38.86	23.0403	4.81787	20	1	0	4	21
Q830Q6	50S ribosomal protein L1 OS=Enterococcus faecalis (strain ATCC 700802 / V583) GN=rplA PE=3 SV=1 - [RL1_ENTFA]	46	7	1	7	37.12	24.4449	9.12939	0	0	25	21	0
Q839I1	Purine nucleoside phosphorylase OS=Enterococcus faecalis (strain ATCC 700802 / V583) GN=deoD-1 PE=3 SV=1 - [Q839I1_ENTFA]	46	6	1	6	27.94	29.2786	5.40186	0	0	45	1	0
Q836L8	Cell wall surface anchor family protein OS=Enterococcus faecalis (strain ATCC 700802 / V583) GN=EF_1093 PE=4 SV=1 - [Q836L8_ENTFA]	46	11	1	11	27.84	67.9476	5.12256	0	0	41	5	0
K9EZ65	Uncharacterized protein OS=Actinobaculum massiliense ACS-171-V-Col2 OX=883066 GN=HMPREF9233_01467 PE=4 SV=1 - [K9EZ65_9ACTO]	46	3	1	3	10.8	55.0932	6.53662	0	0	0	0	46
Q1R553	Periplasmic dipeptide transport protein OS=Escherichia coli (strain UTI89 / UPEC) GN=dppA PE=4 SV=1 - [Q1R553_ECOUT]	45	9	1	8	23.93	60.2553	6.81494	15	7	3	20	0
Q835M3	Pyruvate dehydrogenase complex, E1 component, beta subunit OS=Enterococcus faecalis (strain ATCC 700802 / V583) GN=pdhB PE=4 SV=1 - [Q835M3_ENTFA]	45	10	1	10	40.92	35.3733	4.75439	1	1	30	13	0
B4F1I4	50S ribosomal protein L3 OS=Proteus mirabilis (strain HI4320) OX=529507 GN=rplC PE=3 SV=1 - [RL3_PROMH]	45	7	1	6	47.37	22.4681	9.86182	17	0	18	10	0
B4EZY4	Putative N-acetylneuraminate lyase OS=Proteus mirabilis (strain HI4320) OX=529507 GN=PMI2973 PE=3 SV=1 - [B4EZY4_PROMH]	45	7	1	7	36.7	31.8502	6.44287	3	0	19	23	0
B4ESQ4	Citrate synthase OS=Proteus mirabilis (strain HI4320) OX=529507 GN=gltA PE=3 SV=1 - [B4ESQ4_PROMH]	45	6	1	5	20.14	48.1182	7.10791	33	1	11	0	0
B4EU14	Putative preprotein translocase subunit OS=Proteus mirabilis (strain HI4320) OX=529507 GN=yajC PE=4 SV=1 - [B4EU14_PROMH]	45	3	1	2	37.84	12.1716	9.40771	15	9	9	12	0
B4EZ68	Thiol:disulfide interchange protein OS=Proteus mirabilis (strain HI4320) OX=529507 GN=dsbA PE=1 SV=1 - [B4EZ68_PROMH]	45	4	1	4	19.81	22.8095	6.56592	4	11	17	13	0
B4F0A3	Sodium/glucose cotransporter OS=Proteus mirabilis (strain HI4320) OX=529507 GN=sglT PE=3 SV=1 - [B4F0A3_PROMH]	45	4	1	4	8.27	58.7207	8.47021	18	3	19	5	0
F2I851	Amidohydrolase family protein OS=Aerococcus urinae (strain ACS-120-V-Col10a) GN=HMPREF9243_0572 PE=4 SV=1 - [F2I851_AERUA]	45	6	1	6	19.62	47.1783	5.08447	29	16	0	0	0
F2I7D6	Probable cytosol aminopeptidase OS=Aerococcus urinae (strain ACS-120-V-Col10a) GN=pepA PE=3 SV=1 - [F2I7D6_AERUA]	45	6	1	6	20.97	50.5418	4.93213	34	11	0	0	0
F2I5V5	Phosphocarrier protein HPr OS=Aerococcus urinae (strain ACS-120-V-Col10a) GN=ptsH PE=4 SV=1 - [F2I5V5_AERUA]	45	2	1	2	51.14	9.40167	4.66553	17	24	2	2	0
K9EF56	UDP-N-acetylglucosamine 1-carboxyvinyltransferase OS=Actinobaculum massiliense ACS-171-V-Col2 OX=883066 GN=murA PE=3 SV=1 - [K9EF56_9ACTO]	45	11	1	11	30.57	52.9677	6.62451	15	2	1	1	26
K9ECT5	Adenylosuccinate synthetase OS=Actinobaculum massiliense ACS-171-V-Col2 OX=883066 GN=purA PE=3 SV=1 - [K9ECT5_9ACTO]	45	10	1	10	29.6	46.3844	4.93213	5	0	5	0	35
K9EDE7	Uncharacterized protein OS=Actinobaculum massiliense ACS-171-V-Col2 OX=883066 GN=HMPREF9233_01030 PE=4 SV=1 - [K9EDE7_9ACTO]	45	8	1	7	28.54	53.4672	4.75439	14	5	0	0	26
K9EW50	Uncharacterized protein OS=Actinobaculum massiliense ACS-171-V-Col2 OX=883066 GN=HMPREF9233_00983 PE=4 SV=1 - [K9EW50_9ACTO]	45	3	1	3	35.53	15.1989	4.4751	6	0	0	0	39
K9EI38	Aspartyl/glutamyl-tRNA(Asn/Gln) amidotransferase subunit B OS=Actinobaculum massiliense ACS-171-V-Col2 OX=883066 GN=gatB PE=3 SV=1 - [K9EI38_9ACTO]	45	10	1	10	33.47	53.7278	4.89404	5	0	2	0	38
Q820V5	Enoyl-[acyl-carrier-protein] reductase [NADH] FabI OS=Enterococcus faecalis (strain ATCC 700802 / V583) GN=fabI PE=3 SV=1 - [FABI_ENTFA]	45	8	1	8	34.4	26.7499	5.47803	0	0	25	20	0
Q838P7	N-acyl-D-amino-acid deacylase family protein OS=Enterococcus faecalis (strain ATCC 700802 / V583) GN=EF_0390 PE=4 SV=1 - [Q838P7_ENTFA]	45	14	1	14	52.93	44.9194	5.22412	0	0	39	6	0
Q834C5	Proline dipeptidase OS=Enterococcus faecalis (strain ATCC 700802 / V583) GN=pepQ-2 PE=4 SV=1 - [Q834C5_ENTFA]	45	10	1	10	45.78	40.8477	4.98291	0	0	44	1	0
Q820V4	3-oxoacyl-[acyl-carrier-protein] synthase 2 OS=Enterococcus faecalis (strain ATCC 700802 / V583) GN=fabF-1 PE=3 SV=1 - [Q820V4_ENTFA]	45	6	1	6	23.79	43.1686	5.22412	0	0	11	34	0
Q839G4	50S ribosomal protein L3 OS=Enterococcus faecalis (strain ATCC 700802 / V583) GN=rplC PE=3 SV=1 - [RL3_ENTFA]	44	4	1	4	23.92	22.7033	10.0815	1	0	21	22	0
Q839G5	30S ribosomal protein S10 OS=Enterococcus faecalis (strain ATCC 700802 / V583) GN=rpsJ PE=3 SV=1 - [RS10_ENTFA]	44	3	1	3	36.27	11.7014	9.86182	6	3	12	23	0
F2I7T8	Phosphoenolpyruvate-dependent sugar phosphotransferase system, EIIA 2 OS=Aerococcus urinae (strain ACS-120-V-Col10a) GN=HMPREF9243_1807 PE=4 SV=1 - [F2I7T8_AERUA]	44	5	1	5	59.86	16.0309	4.37354	18	26	0	0	0
K9EW99	Phosphate-specific transport system accessory protein PhoU OS=Actinobaculum massiliense ACS-171-V-Col2 OX=883066 GN=HMPREF9233_01023 PE=3 SV=1 - [K9EW99_9ACTO]	44	9	1	9	42.73	25.4899	4.83057	6	1	0	0	37
K9EV70	Uncharacterized protein OS=Actinobaculum massiliense ACS-171-V-Col2 OX=883066 GN=HMPREF9233_01316 PE=4 SV=1 - [K9EV70_9ACTO]	44	9	1	9	45	31.0216	4.83057	19	1	10	0	14
K9EG41	50S ribosomal protein L29 OS=Actinobaculum massiliense ACS-171-V-Col2 OX=883066 GN=rpmC PE=3 SV=1 - [K9EG41_9ACTO]	44	1	1	1	24	8.66763	8.52881	8	4	2	1	29
Q831G0	Uracil phosphoribosyltransferase OS=Enterococcus faecalis (strain ATCC 700802 / V583) GN=upp PE=3 SV=1 - [UPP_ENTFA]	44	8	1	7	57.89	22.87	5.46533	0	4	32	8	0
Q836D3	S-ribosylhomocysteine lyase OS=Enterococcus faecalis (strain ATCC 700802 / V583) GN=luxS PE=3 SV=1 - [LUXS_ENTFA]	44	6	1	6	53.95	17.1007	5.5415	0	0	34	10	0
Q1RG11	Histone-like protein, located in outer membrane or nucleoid OS=Escherichia coli (strain UTI89 / UPEC) GN=hlpA PE=3 SV=1 - [Q1RG11_ECOUT]	43	2	1	2	17.39	17.6773	9.70068	13	2	0	28	0
B4F139	Protein-export protein SecB OS=Proteus mirabilis (strain HI4320) OX=529507 GN=secB PE=3 SV=1 - [SECB_PROMH]	43	3	1	3	28.03	17.6815	4.2085	14	0	13	16	0
B4ESW6	Putative cystathionine beta-lyase OS=Proteus mirabilis (strain HI4320) OX=529507 GN=metC PE=3 SV=1 - [B4ESW6_PROMH]	43	6	1	6	25.06	43.1541	6.39209	32	11	0	0	0
B4ETT1	NAD(P) transhydrogenase subunit beta OS=Proteus mirabilis (strain HI4320) OX=529507 GN=pntB PE=3 SV=1 - [B4ETT1_PROMH]	43	4	1	3	14.94	49.1365	5.78271	10	0	12	21	0
B4F1C3	Aldehyde dehydrogenase OS=Proteus mirabilis (strain HI4320) OX=529507 GN=aldB PE=3 SV=1 - [B4F1C3_PROMH]	43	8	1	8	28.19	54.0249	5.89697	16	7	17	3	0
F2I782	Nicotinate phosphoribosyltransferase OS=Aerococcus urinae (strain ACS-120-V-Col10a) GN=pncB PE=3 SV=1 - [F2I782_AERUA]	43	6	1	6	21.05	55.5026	5.0083	22	21	0	0	0
F2I525	3-oxoacyl-[acyl-carrier-protein] reductase OS=Aerococcus urinae (strain ACS-120-V-Col10a) GN=fabG PE=4 SV=1 - [F2I525_AERUA]	43	5	1	5	26.53	25.9661	4.90674	35	8	0	0	0
F2I6P8	ABC transporter, ATP-binding protein OS=Aerococcus urinae (strain ACS-120-V-Col10a) GN=HMPREF9243_1619 PE=3 SV=1 - [F2I6P8_AERUA]	43	7	1	6	30.42	35.259	6.53662	28	15	0	0	0
F2I6K3	Ribonuclease J OS=Aerococcus urinae (strain ACS-120-V-Col10a) GN=rnj PE=3 SV=1 - [F2I6K3_AERUA]	43	7	1	7	18.83	66.6298	6.41748	24	19	0	0	0
F2I7T0	30S ribosomal protein S8 OS=Aerococcus urinae (strain ACS-120-V-Col10a) GN=rpsH PE=3 SV=1 - [F2I7T0_AERUA]	43	3	1	3	29.55	14.7649	9.17334	27	16	0	0	0
F2I7B9	Uncharacterized protein OS=Aerococcus urinae (strain ACS-120-V-Col10a) GN=HMPREF9243_0431 PE=4 SV=1 - [F2I7B9_AERUA]	43	1	1	1	18.57	7.75706	5.36377	18	25	0	0	0
F2I4K8	UPF0297 protein HMPREF9243_0968 OS=Aerococcus urinae (strain ACS-120-V-Col10a) GN=HMPREF9243_0968 PE=3 SV=1 - [F2I4K8_AERUA]	43	3	1	3	50.57	10.1722	5.50342	22	21	0	0	0
F2I717	SAF domain protein OS=Aerococcus urinae (strain ACS-120-V-Col10a) GN=HMPREF9243_1665 PE=4 SV=1 - [F2I717_AERUA]	43	7	1	7	27.12	39.7487	4.95752	23	20	0	0	0
K9EWV4	D-alanine--D-alanine ligase OS=Actinobaculum massiliense ACS-171-V-Col2 OX=883066 GN=HMPREF9233_00787 PE=3 SV=1 - [K9EWV4_9ACTO]	43	5	1	5	16.4	33.9176	5.07178	14	5	6	1	17
K9EFS3	4-alpha-glucanotransferase OS=Actinobaculum massiliense ACS-171-V-Col2 OX=883066 GN=HMPREF9233_00275 PE=3 SV=1 - [K9EFS3_9ACTO]	43	11	1	11	22.73	79.8019	4.94482	9	0	6	0	28
K9F0K0	L-lactate dehydrogenase OS=Actinobaculum massiliense ACS-171-V-Col2 OX=883066 GN=ldh PE=3 SV=1 - [K9F0K0_9ACTO]	43	6	1	6	30.84	33.6432	4.71631	7	11	9	0	16
P59687	Glucosamine-6-phosphate deaminase OS=Enterococcus faecalis (strain ATCC 700802 / V583) GN=nagB PE=3 SV=1 - [NAGB_ENTFA]	43	6	1	6	36.05	25.2896	4.89404	0	0	36	7	0
Q82YS1	Surface exclusion protein Sea1 OS=Enterococcus faecalis (strain ATCC 700802 / V583) GN=sea1 PE=4 SV=1 - [Q82YS1_ENTFA]	43	8	1	3	10.45	98.0822	5.66846	0	0	25	18	0
Q1R6B5	N-acetylneuraminate lyase OS=Escherichia coli (strain UTI89 / UPEC) GN=nanA PE=3 SV=1 - [NANA_ECOUT]	42	6	1	6	32.32	32.5728	5.89697	12	5	0	25	0
Q1R612	30S ribosomal protein S3 OS=Escherichia coli (strain UTI89 / UPEC) GN=rpsC PE=3 SV=1 - [RS3_ECOUT]	42	5	1	2	29.61	25.9672	10.272	13	11	0	18	0
Q1RAX1	PTS enzyme IID, mannose-specific OS=Escherichia coli (strain UTI89 / UPEC) GN=manZ PE=4 SV=1 - [Q1RAX1_ECOUT]	42	6	1	6	25.52	31.2826	9.05615	7	2	0	33	0
Q837V3	Glutamyl-tRNA(Gln) amidotransferase subunit A OS=Enterococcus faecalis (strain ATCC 700802 / V583) GN=gatA PE=3 SV=1 - [GATA_ENTFA]	42	7	1	7	19.22	52.5867	5.10986	1	0	19	22	0
B4F2N1	Probable cytosol aminopeptidase OS=Proteus mirabilis (strain HI4320) OX=529507 GN=pepA PE=3 SV=1 - [AMPA_PROMH]	42	8	1	5	22.91	54.8218	6.62451	24	6	9	3	0
F2I513	Ribosome-recycling factor OS=Aerococcus urinae (strain ACS-120-V-Col10a) GN=frr PE=3 SV=1 - [F2I513_AERUA]	42	5	1	5	30.65	21.0719	5.021	26	16	0	0	0
F2I6L3	LPXTG-motif cell wall anchor domain protein OS=Aerococcus urinae (strain ACS-120-V-Col10a) GN=HMPREF9243_1583 PE=4 SV=1 - [F2I6L3_AERUA]	42	3	1	3	21.13	30.0787	9.11475	36	6	0	0	0
F2I7L2	Mannitol-1-phosphate 5-dehydrogenase OS=Aerococcus urinae (strain ACS-120-V-Col10a) GN=mtlD PE=3 SV=1 - [F2I7L2_AERUA]	42	4	1	4	13.39	42.3438	4.94482	27	15	0	0	0
K9EEY7	LPXTG-domain-containing protein cell wall anchor domain OS=Actinobaculum massiliense ACS-171-V-Col2 OX=883066 GN=HMPREF9233_00581 PE=4 SV=1 - [K9EEY7_9ACTO]	42	14	1	14	12.2	159.706	4.80518	21	5	15	0	1
K9EDP5	Transcription termination/antitermination protein NusG OS=Actinobaculum massiliense ACS-171-V-Col2 OX=883066 GN=nusG PE=3 SV=1 - [K9EDP5_9ACTO]	42	5	1	5	30.56	31.3371	4.31006	12	2	2	1	25
Q835H2	Thioredoxin OS=Enterococcus faecalis (strain ATCC 700802 / V583) GN=trx PE=3 SV=1 - [Q835H2_ENTFA]	42	3	1	3	50	11.5867	4.50049	0	0	42	0	0
Q839E7	30S ribosomal protein S5 OS=Enterococcus faecalis (strain ATCC 700802 / V583) GN=rpsE PE=3 SV=1 - [RS5_ENTFA]	41	7	1	7	59.04	17.4066	9.59814	1	0	26	14	0
Q82YY8	Inosine-5'-monophosphate dehydrogenase OS=Enterococcus faecalis (strain ATCC 700802 / V583) GN=guaB PE=3 SV=1 - [Q82YY8_ENTFA]	41	12	1	11	34.89	52.8395	6.02393	4	0	29	8	0
B4EZE0	Phosphate acetyltransferase OS=Proteus mirabilis (strain HI4320) OX=529507 GN=pta PE=3 SV=1 - [B4EZE0_PROMH]	41	13	1	8	24.93	77.7256	5.87158	13	1	15	12	0
B4F195	3-isopropylmalate dehydrogenase OS=Proteus mirabilis (strain HI4320) OX=529507 GN=leuB PE=3 SV=1 - [B4F195_PROMH]	41	3	1	1	11.02	39.7742	5.94775	6	17	3	15	0
F2I693	Dehydrogenase E1 component OS=Aerococcus urinae (strain ACS-120-V-Col10a) GN=HMPREF9243_1527 PE=4 SV=1 - [F2I693_AERUA]	41	6	1	6	21.85	38.8687	4.89404	29	12	0	0	0
F2I8U5	Transketolase, pyridine binding domain protein OS=Aerococcus urinae (strain ACS-120-V-Col10a) GN=HMPREF9243_2051 PE=4 SV=1 - [F2I8U5_AERUA]	41	8	2	8	29.79	36.2717	4.83057	27	14	0	0	0
F2I8F1	Receptor family ligand-binding protein OS=Aerococcus urinae (strain ACS-120-V-Col10a) GN=HMPREF9243_1976 PE=4 SV=1 - [F2I8F1_AERUA]	41	6	1	6	18.93	42.1647	5.04639	33	8	0	0	0
K9ECX8	Polyphosphate kinase OS=Actinobaculum massiliense ACS-171-V-Col2 OX=883066 GN=ppk PE=3 SV=1 - [K9ECX8_9ACTO]	41	11	1	11	14.7	116.968	5.71924	8	0	2	0	31
K9EFK9	DNA gyrase subunit A OS=Actinobaculum massiliense ACS-171-V-Col2 OX=883066 GN=gyrA PE=3 SV=1 - [K9EFK9_9ACTO]	41	16	1	16	26.72	94.9924	5.19873	8	0	4	0	29
K9EJE6	Uncharacterized protein OS=Actinobaculum massiliense ACS-171-V-Col2 OX=883066 GN=HMPREF9233_00044 PE=4 SV=1 - [K9EJE6_9ACTO]	41	5	1	5	40.17	24.8417	4.71631	11	1	6	1	22
K9EXJ8	Uncharacterized protein OS=Actinobaculum massiliense ACS-171-V-Col2 OX=883066 GN=HMPREF9233_00499 PE=4 SV=1 - [K9EXJ8_9ACTO]	41	3	1	3	42.05	9.03971	4.58936	3	2	0	0	36
K9EC14	Uncharacterized protein OS=Actinobaculum massiliense ACS-171-V-Col2 OX=883066 GN=HMPREF9233_01253 PE=3 SV=1 - [K9EC14_9ACTO]	41	4	1	4	26.02	28.5757	5.17334	1	0	0	0	40
Q835M2	Dihydrolipoamide acetyltransferase component of pyruvate dehydrogenase complex OS=Enterococcus faecalis (strain ATCC 700802 / V583) GN=aceF PE=3 SV=1 - [Q835M2_ENTFA]	41	10	1	10	31.73	56.642	4.81787	0	2	30	9	0
O07111	Cell division protein FtsA OS=Enterococcus faecalis (strain ATCC 700802 / V583) GN=ftsA PE=3 SV=2 - [FTSA_ENTFA]	41	9	1	9	31.14	48.1477	4.76709	0	0	26	15	0
Q833K9	Cation-transporting ATPase, E1-E2 family OS=Enterococcus faecalis (strain ATCC 700802 / V583) GN=EF_1938 PE=4 SV=1 - [Q833K9_ENTFA]	41	14	1	14	24.08	97.0909	5.07178	0	0	34	7	0
B4EXX9	Putative siderophore biosynthetic protein OS=Proteus mirabilis (strain HI4320) OX=529507 GN=nrpU PE=4 SV=1 - [B4EXX9_PROMH]	41	8	1	8	27.07	41.2532	8.54346	0	0	24	17	0
Q1R357	50S ribosomal protein L9 OS=Escherichia coli (strain UTI89 / UPEC) GN=rplI PE=3 SV=1 - [RL9_ECOUT]	40	6	1	3	45.64	15.7595	6.58057	16	3	4	17	0
Q1RFD4	Uncharacterized protein OS=Escherichia coli (strain UTI89 / UPEC) GN=yajC PE=4 SV=1 - [Q1RFD4_ECOUT]	40	2	1	1	18.33	12.9919	9.34912	15	0	8	17	0
Q1R5W6	DNA-binding protein HU-alpha (HU-2) OS=Escherichia coli (strain UTI89 / UPEC) GN=hupA PE=3 SV=1 - [Q1R5W6_ECOUT]	40	4	1	4	57.78	9.52919	9.5835	17	11	3	9	0
Q1R5B8	Oligopeptidase A OS=Escherichia coli (strain UTI89 / UPEC) GN=prlC PE=3 SV=1 - [Q1R5B8_ECOUT]	40	8	1	6	17.46	78.4663	5.2749	16	1	0	23	0
Q834M9	CoA-binding domain protein OS=Enterococcus faecalis (strain ATCC 700802 / V583) GN=EF_1616 PE=4 SV=1 - [Q834M9_ENTFA]	40	7	1	7	57.04	15.9314	4.83057	3	0	35	2	0
B4F1J6	50S ribosomal protein L5 OS=Proteus mirabilis (strain HI4320) OX=529507 GN=rplE PE=3 SV=1 - [RL5_PROMH]	40	7	1	5	46.37	20.2106	9.61279	11	10	10	9	0
B4EVN0	Universal stress protein F OS=Proteus mirabilis (strain HI4320) OX=529507 GN=uspF PE=4 SV=1 - [B4EVN0_PROMH]	40	3	1	3	40.97	15.7004	7.50342	14	2	23	1	0
B4F044	Pyridoxine 5'-phosphate synthase OS=Proteus mirabilis (strain HI4320) OX=529507 GN=pdxJ PE=3 SV=1 - [B4F044_PROMH]	40	5	1	5	29.22	26.8558	5.37646	13	1	19	7	0
B4EY41	Gluconokinase OS=Proteus mirabilis (strain HI4320) OX=529507 GN=gntK PE=3 SV=1 - [B4EY41_PROMH]	40	5	1	4	32.07	20.6255	6.34131	11	4	19	6	0
B4EZR7	Phosphoenolpyruvate-protein phosphotransferase OS=Proteus mirabilis (strain HI4320) OX=529507 GN=ptsI PE=3 SV=1 - [B4EZR7_PROMH]	40	11	1	10	26.78	63.6541	4.86865	17	2	20	1	0
B4EV88	Thioredoxin reductase OS=Proteus mirabilis (strain HI4320) OX=529507 GN=trxB PE=3 SV=1 - [B4EV88_PROMH]	40	7	2	7	40.75	34.5704	5.33838	5	1	30	4	0
B4F145	UDP-glucose 6-dehydrogenase OS=Proteus mirabilis (strain HI4320) OX=529507 GN=ugd PE=3 SV=1 - [B4F145_PROMH]	40	6	1	6	22.94	43.8476	5.56689	25	1	10	4	0
F2I4L2	Transcription elongation factor GreA OS=Aerococcus urinae (strain ACS-120-V-Col10a) GN=greA PE=3 SV=1 - [F2I4L2_AERUA]	40	7	1	7	50.94	17.544	4.52588	35	4	0	1	0
F2I698	50S ribosomal protein L19 OS=Aerococcus urinae (strain ACS-120-V-Col10a) GN=rplS PE=3 SV=1 - [F2I698_AERUA]	40	4	1	4	28.33	13.8927	11.0483	21	19	0	0	0
K9F061	Glutamine--fructose-6-phosphate aminotransferase [isomerizing] OS=Actinobaculum massiliense ACS-171-V-Col2 OX=883066 GN=HMPREF9233_01309 PE=4 SV=1 - [K9F061_9ACTO]	40	10	1	10	22.35	64.5825	5.47803	3	4	1	0	32
K9EY77	Uncharacterized protein OS=Actinobaculum massiliense ACS-171-V-Col2 OX=883066 GN=HMPREF9233_00679 PE=3 SV=1 - [K9EY77_9ACTO]	40	6	1	6	23.82	34.7972	10.4038	9	2	2	0	27
K9EZK1	Uncharacterized protein OS=Actinobaculum massiliense ACS-171-V-Col2 OX=883066 GN=HMPREF9233_01622 PE=4 SV=1 - [K9EZK1_9ACTO]	40	7	1	7	15.77	64.2332	7.1958	13	9	4	0	14
K9ECI4	Uncharacterized protein OS=Actinobaculum massiliense ACS-171-V-Col2 OX=883066 GN=HMPREF9233_01102 PE=4 SV=1 - [K9ECI4_9ACTO]	40	4	1	4	20.38	34.1715	3.94189	8	0	2	0	30
K9EBV1	Uncharacterized protein OS=Actinobaculum massiliense ACS-171-V-Col2 OX=883066 GN=HMPREF9233_01696 PE=4 SV=1 - [K9EBV1_9ACTO]	40	4	1	4	24.19	27.299	4.31006	10	3	0	0	27
K9EDE1	Corynebacterium family glycogen synthase OS=Actinobaculum massiliense ACS-171-V-Col2 OX=883066 GN=HMPREF9233_01670 PE=4 SV=1 - [K9EDE1_9ACTO]	40	11	1	11	37.41	45.0649	5.021	4	0	2	0	34
K9F0J2	Ribosome-binding ATPase YchF OS=Actinobaculum massiliense ACS-171-V-Col2 OX=883066 GN=ychF PE=3 SV=1 - [K9F0J2_9ACTO]	40	7	1	7	30.64	39.3	4.60205	11	2	2	0	25
Q1R5V1	50S ribosomal protein L7/L12 OS=Escherichia coli (strain UTI89 / UPEC) GN=rplL PE=3 SV=1 - [RL7_ECOUT]	40	5	1	1	57.02	12.2875	4.65283	0	18	0	22	0
Q820T4	3-oxoacyl-[acyl-carrier-protein] synthase 2 OS=Enterococcus faecalis (strain ATCC 700802 / V583) GN=fabF-2 PE=3 SV=1 - [Q820T4_ENTFA]	40	5	1	5	22.14	43.0426	5.2876	0	0	26	14	0
Q1RG21	30S ribosomal protein S2 OS=Escherichia coli (strain UTI89 / UPEC) GN=rpsB PE=3 SV=2 - [RS2_ECOUT]	39	8	1	5	43.98	26.7268	7.13721	24	3	0	12	0
Q837N5	Leucine--tRNA ligase OS=Enterococcus faecalis (strain ATCC 700802 / V583) GN=leuS PE=3 SV=1 - [SYL_ENTFA]	39	15	1	15	33.96	91.7812	5.14795	7	1	27	4	0
B4F171	ATP-dependent protease ATPase subunit HslU OS=Proteus mirabilis (strain HI4320) OX=529507 GN=hslU PE=3 SV=1 - [HSLU_PROMH]	39	7	1	2	18.83	49.972	5.41455	4	0	11	24	0
B4F1I9	50S ribosomal protein L22 OS=Proteus mirabilis (strain HI4320) OX=529507 GN=rplV PE=3 SV=1 - [RL22_PROMH]	39	5	1	3	50.91	12.1337	10.1841	18	1	11	9	0
B4EWK6	Phage shock protein A OS=Proteus mirabilis (strain HI4320) OX=529507 GN=pspA PE=4 SV=1 - [B4EWK6_PROMH]	39	4	1	3	20.27	25.4412	5.63037	12	2	10	15	0
B4F2Y3	Putative secreted 5'-nucleotidase OS=Proteus mirabilis (strain HI4320) OX=529507 GN=PMI0047 PE=3 SV=1 - [B4F2Y3_PROMH]	39	9	1	9	24.07	57.8548	6.75635	19	0	10	10	0
F2I457	Uncharacterized protein OS=Aerococcus urinae (strain ACS-120-V-Col10a) GN=HMPREF9243_0789 PE=4 SV=1 - [F2I457_AERUA]	39	7	1	7	26.95	34.0965	4.37354	16	23	0	0	0
F2I689	Chaperone protein ClpB OS=Aerococcus urinae (strain ACS-120-V-Col10a) GN=clpB PE=3 SV=1 - [F2I689_AERUA]	39	6	1	3	10.21	98.6514	4.93213	13	6	20	0	0
F2I7Y3	Rhodanese-like protein OS=Aerococcus urinae (strain ACS-120-V-Col10a) GN=HMPREF9243_1855 PE=4 SV=1 - [F2I7Y3_AERUA]	39	2	1	2	22	11.4776	4.75439	14	25	0	0	0
K9ECW8	50S ribosomal protein L21 OS=Actinobaculum massiliense ACS-171-V-Col2 OX=883066 GN=rplU PE=3 SV=1 - [K9ECW8_9ACTO]	39	3	1	3	42.57	10.9461	9.72998	9	6	5	0	19
K9EZ63	Uncharacterized protein OS=Actinobaculum massiliense ACS-171-V-Col2 OX=883066 GN=HMPREF9233_01462 PE=4 SV=1 - [K9EZ63_9ACTO]	39	7	1	7	44.34	23.193	5.12256	15	9	5	0	10
K9EX42	Glutamyl-tRNA(Gln) amidotransferase subunit A OS=Actinobaculum massiliense ACS-171-V-Col2 OX=883066 GN=gatA PE=3 SV=1 - [K9EX42_9ACTO]	39	10	1	10	37.65	52.748	4.86865	2	0	0	0	37
K9F0L5	Uncharacterized protein OS=Actinobaculum massiliense ACS-171-V-Col2 OX=883066 GN=HMPREF9233_01183 PE=3 SV=1 - [K9F0L5_9ACTO]	39	2	1	2	8.93	36.5004	9.24658	11	6	1	0	21
K9EF21	Uncharacterized protein OS=Actinobaculum massiliense ACS-171-V-Col2 OX=883066 GN=HMPREF9233_01019 PE=4 SV=1 - [K9EF21_9ACTO]	39	6	1	6	10.87	62.1313	8.33838	7	5	2	0	25
K9EI09	Uncharacterized protein OS=Actinobaculum massiliense ACS-171-V-Col2 OX=883066 GN=HMPREF9233_00273 PE=4 SV=1 - [K9EI09_9ACTO]	39	3	1	3	17.17	21.6726	4.51318	7	1	7	0	24
Q831S9	Threonine synthase OS=Enterococcus faecalis (strain ATCC 700802 / V583) GN=thrC PE=3 SV=1 - [Q831S9_ENTFA]	39	9	1	9	43.87	37.1393	5.59229	0	0	33	6	0
Q82ZD0	2-dehydro-3-deoxyphosphogluconate aldolase/4-hydroxy-2-oxoglutarate aldolase OS=Enterococcus faecalis (strain ATCC 700802 / V583) GN=eda-2 PE=4 SV=1 - [Q82ZD0_ENTFA]	39	6	1	6	32.72	23.7316	5.12256	0	0	13	26	0
Q03011	Major MR/P fimbria protein OS=Proteus mirabilis (strain HI4320) OX=529507 GN=mrpA PE=1 SV=1 - [MRPA_PROMH]	39	5	1	5	53.14	17.8991	4.91943	0	0	17	22	0
K9EJ53	Histidinol-phosphate aminotransferase OS=Actinobaculum massiliense ACS-171-V-Col2 OX=883066 GN=hisC PE=3 SV=1 - [K9EJ53_9ACTO]	39	6	1	6	24.73	39.2894	5.0083	0	0	4	0	35
Q1R3Y6	ATP-dependent protease ATPase subunit HslU OS=Escherichia coli (strain UTI89 / UPEC) GN=hslU PE=3 SV=1 - [HSLU_ECOUT]	39	9	1	4	22.57	49.5499	5.35107	0	0	0	39	0
Q1R4G3	Ketol-acid reductoisomerase (NADP(+)) OS=Escherichia coli (strain UTI89 / UPEC) GN=ilvC PE=3 SV=2 - [ILVC_ECOUT]	38	7	1	3	16.9	54.0203	5.31299	14	9	0	15	0
Q1R785	S-adenosylmethionine synthase OS=Escherichia coli (strain UTI89 / UPEC) GN=metK PE=3 SV=1 - [Q1R785_ECOUT]	38	7	1	2	25.77	42.3965	5.26221	21	3	0	14	0
Q1R227	Putative exported protein OS=Escherichia coli (strain UTI89 / UPEC) GN=UTI89_P011 PE=4 SV=1 - [Q1R227_ECOUT]	38	6	1	6	44	19.2113	5.73193	6	3	8	21	0
Q82Z47	30S ribosomal protein S9 OS=Enterococcus faecalis (strain ATCC 700802 / V583) GN=rpsI PE=3 SV=1 - [RS9_ENTFA]	38	3	1	3	26.92	14.2348	10.6968	8	8	8	14	0
Q838I4	Superoxide dismutase [Fe] OS=Enterococcus faecalis (strain ATCC 700802 / V583) GN=sodA PE=3 SV=1 - [SODM_ENTFA]	38	7	1	7	59.41	22.6831	5.13525	6	1	26	5	0
Q839Z4	Beta sliding clamp OS=Enterococcus faecalis (strain ATCC 700802 / V583) GN=dnaN PE=3 SV=1 - [Q839Z4_ENTFA]	38	10	1	10	38.3	42.1878	4.91943	6	2	25	5	0
B4EUW4	30S ribosomal protein S16 OS=Proteus mirabilis (strain HI4320) OX=529507 GN=rpsP PE=3 SV=1 - [RS16_PROMH]	38	3	1	3	45.12	9.09588	10.3306	8	0	4	26	0
B4EXM0	30S ribosomal protein S9 OS=Proteus mirabilis (strain HI4320) OX=529507 GN=rpsI PE=3 SV=1 - [RS9_PROMH]	38	4	2	4	36.15	14.68	11.0923	8	2	16	11	1
B4F2T5	Isoleucine--tRNA ligase OS=Proteus mirabilis (strain HI4320) OX=529507 GN=ileS PE=3 SV=1 - [SYI_PROMH]	38	6	1	6	7.59	105.124	6.27783	18	6	10	4	0
B4F1D4	Putative exported sulfatase OS=Proteus mirabilis (strain HI4320) OX=529507 GN=PMI2124 PE=4 SV=1 - [B4F1D4_PROMH]	38	12	1	12	33.72	58.8199	6.04932	13	0	25	0	0
B4F0I4	Putative chromate reductase (NADPH-dependent FMN reductase) OS=Proteus mirabilis (strain HI4320) OX=529507 GN=chrR PE=4 SV=1 - [B4F0I4_PROMH]	38	5	1	5	40.11	20.4883	6.771	17	0	11	10	0
B4EW60	RNA polymerase sigma factor RpoD OS=Proteus mirabilis (strain HI4320) OX=529507 GN=rpoD PE=3 SV=1 - [B4EW60_PROMH]	38	4	1	3	8.74	71.1086	4.76709	23	0	11	4	0
F2I7P3	Ser/Thr phosphatase family protein OS=Aerococcus urinae (strain ACS-120-V-Col10a) GN=HMPREF9243_0485 PE=4 SV=1 - [F2I7P3_AERUA]	38	5	1	5	18.92	40.7414	6.16357	22	16	0	0	0
F2I7H7	Uncharacterized protein OS=Aerococcus urinae (strain ACS-120-V-Col10a) GN=HMPREF9243_1768 PE=4 SV=1 - [F2I7H7_AERUA]	38	6	1	6	25.31	43.7392	4.99561	15	23	0	0	0
K9EFC1	UPF0371 protein OS=Actinobaculum massiliense ACS-171-V-Col2 OX=883066 GN=HMPREF9233_00686 PE=4 SV=1 - [K9EFC1_9ACTO]	38	8	1	8	22.39	60.0602	7.31299	5	1	0	0	32
K9EZ50	Uncharacterized protein OS=Actinobaculum massiliense ACS-171-V-Col2 OX=883066 GN=HMPREF9233_01442 PE=4 SV=1 - [K9EZ50_9ACTO]	38	9	1	9	20.33	65.991	9.51025	3	0	0	0	35
Q830Y9	NH(3)-dependent NAD(+) synthetase OS=Enterococcus faecalis (strain ATCC 700802 / V583) GN=nadE PE=3 SV=1 - [NADE_ENTFA]	38	10	1	10	65.09	30.3936	5.08447	0	0	37	1	0
Q1RAT0	Pyruvate kinase OS=Escherichia coli (strain UTI89 / UPEC) GN=pykA PE=3 SV=1 - [Q1RAT0_ECOUT]	37	9	1	5	26	56.9384	7.21045	17	4	0	16	0
Q1RBJ6	NAD(P) transhydrogenase subunit beta OS=Escherichia coli (strain UTI89 / UPEC) GN=pntB PE=3 SV=1 - [Q1RBJ6_ECOUT]	37	4	1	3	11.69	48.6915	6.13818	6	0	0	31	0
Q1R8M8	Inosine-5'-monophosphate dehydrogenase OS=Escherichia coli (strain UTI89 / UPEC) GN=guaB PE=3 SV=1 - [Q1R8M8_ECOUT]	37	7	1	4	19.96	54.6064	6.41748	12	8	7	10	0
Q1RGA0	Cell division protein FtsZ OS=Escherichia coli (strain UTI89 / UPEC) GN=ftsZ PE=3 SV=1 - [Q1RGA0_ECOUT]	37	7	1	1	24.02	40.2986	4.77979	12	8	0	17	0
Q839H0	30S ribosomal protein S7 OS=Enterococcus faecalis (strain ATCC 700802 / V583) GN=rpsG PE=3 SV=1 - [RS7_ENTFA]	37	5	1	5	46.79	17.8223	9.979	1	0	21	15	0
B4EUW0	S-ribosylhomocysteine lyase OS=Proteus mirabilis (strain HI4320) OX=529507 GN=luxS PE=3 SV=1 - [LUXS_PROMH]	37	4	1	3	36.84	19.1726	5.92236	7	0	15	15	0
B4F275	30S ribosomal protein S6 OS=Proteus mirabilis (strain HI4320) OX=529507 GN=rpsF PE=3 SV=1 - [RS6_PROMH]	37	4	1	1	40.46	15.3836	5.04639	15	4	11	7	0
B4ESR3	Cytochrome D ubiquinol oxidase subunit I OS=Proteus mirabilis (strain HI4320) OX=529507 GN=cydA PE=4 SV=1 - [B4ESR3_PROMH]	37	8	1	8	22.8	58.1269	6.96143	8	0	19	10	0
B4EX62	Hemin transport protein OS=Proteus mirabilis (strain HI4320) OX=529507 GN=hmuS PE=4 SV=1 - [B4EX62_PROMH]	37	8	1	8	30.58	41.2842	6.20166	4	0	28	5	0
B4EUM2	Putative amidohydrolase/metallopeptidase OS=Proteus mirabilis (strain HI4320) OX=529507 GN=PMI0287 PE=4 SV=1 - [B4EUM2_PROMH]	37	6	1	6	19.62	45.812	5.32568	2	0	25	10	0
F2I5B6	4-phosphoerythronate dehydrogenase OS=Aerococcus urinae (strain ACS-120-V-Col10a) GN=pdxB PE=3 SV=1 - [F2I5B6_AERUA]	37	5	1	5	18.02	44.1573	5.59229	21	16	0	0	0
F2I4X0	DHHA2 domain protein OS=Aerococcus urinae (strain ACS-120-V-Col10a) GN=HMPREF9243_1100 PE=4 SV=1 - [F2I4X0_AERUA]	37	4	1	4	17.68	34.1152	4.69092	24	13	0	0	0
K9EU77	Rne/Rng family ribonuclease OS=Actinobaculum massiliense ACS-171-V-Col2 OX=883066 GN=HMPREF9233_01469 PE=4 SV=1 - [K9EU77_9ACTO]	37	11	1	11	17.79	92.8658	9.5835	8	0	1	0	28
K9EJG3	Glutamine synthetase OS=Actinobaculum massiliense ACS-171-V-Col2 OX=883066 GN=HMPREF9233_00074 PE=3 SV=1 - [K9EJG3_9ACTO]	37	10	1	10	30.25	53.7963	5.0083	5	2	9	0	21
K9EBL2	Transcription antitermination factor NusB OS=Actinobaculum massiliense ACS-171-V-Col2 OX=883066 GN=HMPREF9233_01601 PE=4 SV=1 - [K9EBL2_9ACTO]	37	6	1	6	44.34	23.5196	4.4751	18	4	0	0	15
Q833H1	Universal stress protein OS=Enterococcus faecalis (strain ATCC 700802 / V583) GN=EF_1982 PE=3 SV=1 - [Q833H1_ENTFA]	37	5	1	5	30.57	17.1888	4.95752	0	2	23	12	0
Q834M1	Aldehyde dehydrogenase, putative OS=Enterococcus faecalis (strain ATCC 700802 / V583) GN=EF_1624 PE=4 SV=1 - [Q834M1_ENTFA]	37	9	1	9	27.85	52.6367	7.13721	0	21	15	1	0
Q1R9H8	Glycerophosphodiester phosphodiesterase, periplasmic OS=Escherichia coli (strain UTI89 / UPEC) GN=glpQ PE=4 SV=1 - [Q1R9H8_ECOUT]	37	4	1	1	15.92	40.8123	5.70654	0	0	21	16	0
Q830Q5	50S ribosomal protein L11 OS=Enterococcus faecalis (strain ATCC 700802 / V583) GN=rplK PE=3 SV=1 - [RL11_ENTFA]	37	4	1	4	37.14	14.681	9.5249	0	0	20	17	0
Q831F4	Fumarate reductase flavoprotein subunit, putative OS=Enterococcus faecalis (strain ATCC 700802 / V583) GN=EF_2556 PE=4 SV=1 - [Q831F4_ENTFA]	37	12	1	12	29.9	53.7814	5.40186	0	0	30	7	0
Q834T5	Ribosomal protein S1 OS=Enterococcus faecalis (strain ATCC 700802 / V583) GN=EF_1548 PE=4 SV=1 - [Q834T5_ENTFA]	37	11	1	11	36.97	43.7495	4.64014	0	0	30	7	0
Q1R8V4	Phosphoenolpyruvate-protein phosphotransferase OS=Escherichia coli (strain UTI89 / UPEC) GN=ptsI PE=3 SV=1 - [Q1R8V4_ECOUT]	36	10	1	8	23.65	63.5239	4.86865	14	0	0	22	0
Q1R486	Uridine phosphorylase OS=Escherichia coli (strain UTI89 / UPEC) GN=udp PE=3 SV=1 - [Q1R486_ECOUT]	36	5	1	4	55.76	23.3689	6.53662	6	2	8	20	0
B4F271	Adenylosuccinate synthetase OS=Proteus mirabilis (strain HI4320) OX=529507 GN=purA PE=3 SV=1 - [PURA_PROMH]	36	9	1	6	28.01	47.3016	5.66846	13	5	11	7	0
B4EY40	Low-affinity gluconate transporter OS=Proteus mirabilis (strain HI4320) OX=529507 GN=gntU PE=4 SV=1 - [B4EY40_PROMH]	36	4	1	4	13.93	46.0948	7.88428	14	4	17	1	0
B4F0P9	D-3-phosphoglycerate dehydrogenase OS=Proteus mirabilis (strain HI4320) OX=529507 GN=serA PE=3 SV=1 - [B4F0P9_PROMH]	36	7	1	7	26.2	45.2417	6.7124	22	2	12	0	0
B4EWG3	Respiratory nitrate reductase 1 alpha chain OS=Proteus mirabilis (strain HI4320) OX=529507 GN=narG PE=3 SV=1 - [B4EWG3_PROMH]	36	12	1	12	13.33	141.206	6.771	14	0	18	3	1
F2I6Q0	ABC transporter, permease protein OS=Aerococcus urinae (strain ACS-120-V-Col10a) GN=HMPREF9243_1621 PE=3 SV=1 - [F2I6Q0_AERUA]	36	4	1	4	14.78	37.4234	9.23193	16	20	0	0	0
F2I4D8	Aminopeptidase OS=Aerococcus urinae (strain ACS-120-V-Col10a) GN=HMPREF9243_0893 PE=3 SV=1 - [F2I4D8_AERUA]	36	6	1	6	10.68	94.8117	4.71631	26	10	0	0	0
F2I4J5	Acetate kinase OS=Aerococcus urinae (strain ACS-120-V-Col10a) GN=ackA PE=3 SV=1 - [F2I4J5_AERUA]	36	8	1	8	25.51	43.1636	4.80518	18	18	0	0	0
F2I4T7	Uncharacterized protein OS=Aerococcus urinae (strain ACS-120-V-Col10a) GN=HMPREF9243_1063 PE=4 SV=1 - [F2I4T7_AERUA]	36	3	1	3	25.85	17.4957	5.17334	21	15	0	0	0
F2I7S4	50S ribosomal protein L16 OS=Aerococcus urinae (strain ACS-120-V-Col10a) GN=rplP PE=3 SV=1 - [F2I7S4_AERUA]	36	2	1	2	20.42	15.9117	10.4624	16	20	0	0	0
K9F3E3	RNA polymerase sigma factor SigA OS=Actinobaculum massiliense ACS-171-V-Col2 OX=883066 GN=sigA PE=3 SV=1 - [K9F3E3_9ACTO]	36	9	1	9	19.49	63.9372	5.2876	18	1	0	0	17
K9F020	50S ribosomal protein L16 OS=Actinobaculum massiliense ACS-171-V-Col2 OX=883066 GN=rplP PE=3 SV=1 - [K9F020_9ACTO]	36	3	1	3	29.71	15.6484	10.77	23	2	3	0	8
K9F3F5	Uncharacterized protein OS=Actinobaculum massiliense ACS-171-V-Col2 OX=883066 GN=HMPREF9233_00073 PE=4 SV=1 - [K9F3F5_9ACTO]	36	3	1	3	25.32	26.3256	11.2388	3	2	0	0	31
K9EVF8	Type II (General) Secretory Pathway (IISP) Family protein OS=Actinobaculum massiliense ACS-171-V-Col2 OX=883066 GN=HMPREF9233_01401 PE=4 SV=1 - [K9EVF8_9ACTO]	36	7	1	7	37.39	25.3556	9.80322	15	1	0	0	20
Q834A6	Ribosome hibernation promoting factor OS=Enterococcus faecalis (strain ATCC 700802 / V583) GN=yfiA PE=3 SV=1 - [Q834A6_ENTFA]	36	6	1	6	44.26	21.145	6.11279	0	0	31	5	0
Q838Q3	Uncharacterized protein OS=Enterococcus faecalis (strain ATCC 700802 / V583) GN=EF_0383 PE=4 SV=1 - [Q838Q3_ENTFA]	36	12	1	12	16.25	107.931	4.80518	0	0	34	2	0
B4EW71	Tellurite resistance protein OS=Proteus mirabilis (strain HI4320) OX=529507 GN=terE PE=4 SV=1 - [B4EW71_PROMH]	36	7	1	7	56.02	20.562	4.85596	0	0	25	11	0
Q1R8I4	Serine hydroxymethyltransferase OS=Escherichia coli (strain UTI89 / UPEC) GN=glyA PE=3 SV=2 - [GLYA_ECOUT]	35	5	1	2	16.55	45.288	6.48096	14	4	0	17	0
Q1R5V0	50S ribosomal protein L10 OS=Escherichia coli (strain UTI89 / UPEC) GN=rplJ PE=3 SV=1 - [RL10_ECOUT]	35	5	1	3	38.18	17.7004	8.98291	15	2	0	18	0
Q1RBP6	Altronate oxidoreductase OS=Escherichia coli (strain UTI89 / UPEC) GN=uxaB PE=3 SV=1 - [UXAB_ECOUT]	35	9	1	9	26.92	54.8002	5.07178	1	1	1	32	0
Q837L6	50S ribosomal protein L25 OS=Enterococcus faecalis (strain ATCC 700802 / V583) GN=rplY PE=3 SV=1 - [RL25_ENTFA]	35	6	1	6	51.98	22.2764	4.50049	1	0	33	1	0
B4ETL2	Integration host factor subunit alpha OS=Proteus mirabilis (strain HI4320) OX=529507 GN=ihfA PE=3 SV=1 - [IHFA_PROMH]	35	4	1	4	41.84	11.1269	9.62744	13	3	12	7	0
B4EVB9	Asparagine--tRNA ligase OS=Proteus mirabilis (strain HI4320) OX=529507 GN=asnS PE=3 SV=1 - [B4EVB9_PROMH]	35	9	1	7	28.54	52.6353	5.41455	13	2	16	4	0
F2I571	Uncharacterized protein OS=Aerococcus urinae (strain ACS-120-V-Col10a) GN=HMPREF9243_1233 PE=4 SV=1 - [F2I571_AERUA]	35	6	1	6	21.76	44.5034	5.77002	24	11	0	0	0
F2I5L1	Amidohydrolase OS=Aerococcus urinae (strain ACS-120-V-Col10a) GN=HMPREF9243_0045 PE=4 SV=1 - [F2I5L1_AERUA]	35	6	1	6	20.6	44.1337	4.90674	12	23	0	0	0
F2I5F9	GTPase Der OS=Aerococcus urinae (strain ACS-120-V-Col10a) GN=der PE=3 SV=1 - [F2I5F9_AERUA]	35	7	1	7	25	48.9536	5.84619	19	16	0	0	0
F2I590	Ribonuclease J OS=Aerococcus urinae (strain ACS-120-V-Col10a) GN=rnj PE=3 SV=1 - [F2I590_AERUA]	35	8	1	8	24.96	61.3715	5.66846	20	15	0	0	0
F2I5S5	DivIVA domain protein OS=Aerococcus urinae (strain ACS-120-V-Col10a) GN=HMPREF9243_1410 PE=4 SV=1 - [F2I5S5_AERUA]	35	6	1	6	40.43	26.8401	4.53857	20	15	0	0	0
F2I734	Methionine--tRNA ligase OS=Aerococcus urinae (strain ACS-120-V-Col10a) GN=metG PE=3 SV=1 - [F2I734_AERUA]	35	3	1	3	5.56	76.0242	4.91943	24	11	0	0	0
F2I8V5	Peptidase C1-like family OS=Aerococcus urinae (strain ACS-120-V-Col10a) GN=HMPREF9243_0702 PE=4 SV=1 - [F2I8V5_AERUA]	35	6	1	6	18.47	51.6847	5.42725	19	16	0	0	0
K9EEF7	UDP-glucose 6-dehydrogenase OS=Actinobaculum massiliense ACS-171-V-Col2 OX=883066 GN=HMPREF9233_01201 PE=3 SV=1 - [K9EEF7_9ACTO]	35	10	1	10	36.6	42.6319	5.66846	11	0	7	0	17
Q834Q6	Cysteine synthase OS=Enterococcus faecalis (strain ATCC 700802 / V583) GN=cysK PE=3 SV=1 - [Q834Q6_ENTFA]	35	11	1	11	57.74	32.5181	5.41455	0	0	35	0	0
Q838B1	Oligoendopeptidase F, putative OS=Enterococcus faecalis (strain ATCC 700802 / V583) GN=EF_0661 PE=3 SV=1 - [Q838B1_ENTFA]	35	11	1	11	28.57	68.909	4.94482	0	0	35	0	0
Q1RGC4	3-isopropylmalate dehydrogenase OS=Escherichia coli (strain UTI89 / UPEC) GN=leuB PE=3 SV=1 - [LEU3_ECOUT]	34	6	1	4	23.9	39.6071	5.2876	7	6	3	18	0
Q838H8	Ribonucleoside-diphosphate reductase subunit beta OS=Enterococcus faecalis (strain ATCC 700802 / V583) GN=nrdF PE=3 SV=1 - [Q838H8_ENTFA]	34	5	1	5	17.76	37.3153	4.57666	1	1	20	12	0
B4ESY3	Cytidine deaminase OS=Proteus mirabilis (strain HI4320) OX=529507 GN=cdd PE=3 SV=1 - [CDD_PROMH]	34	3	1	3	16.67	32.0059	6.1001	3	3	24	4	0
B4F1J1	50S ribosomal protein L16 OS=Proteus mirabilis (strain HI4320) OX=529507 GN=rplP PE=3 SV=1 - [RL16_PROMH]	34	4	1	3	43.38	15.2985	10.9019	12	5	10	7	0
F2I7G6	Uncharacterized protein OS=Aerococcus urinae (strain ACS-120-V-Col10a) GN=HMPREF9243_1755 PE=4 SV=1 - [F2I7G6_AERUA]	34	4	1	4	14.88	41.0363	4.97021	22	12	0	0	0
F2I6A2	30S ribosomal protein S16 OS=Aerococcus urinae (strain ACS-120-V-Col10a) GN=rpsP PE=3 SV=1 - [F2I6A2_AERUA]	34	2	1	2	38.89	10.2845	10.1548	25	9	0	0	0
F2I7L1	Thioesterase family protein OS=Aerococcus urinae (strain ACS-120-V-Col10a) GN=HMPREF9243_1805 PE=4 SV=1 - [F2I7L1_AERUA]	34	6	1	6	41.38	19.836	6.20166	14	20	0	0	0
F2I565	RNA polymerase sigma factor SigA OS=Aerococcus urinae (strain ACS-120-V-Col10a) GN=rpoD PE=3 SV=1 - [F2I565_AERUA]	34	5	1	5	15.96	45.9437	5.0083	24	10	0	0	0
F2I593	Uracil phosphoribosyltransferase OS=Aerococcus urinae (strain ACS-120-V-Col10a) GN=upp PE=3 SV=1 - [F2I593_AERUA]	34	9	1	8	67.61	23.3322	5.12256	25	9	0	0	0
K9EHX1	Uncharacterized protein OS=Actinobaculum massiliense ACS-171-V-Col2 OX=883066 GN=HMPREF9233_00791 PE=4 SV=1 - [K9EHX1_9ACTO]	34	10	1	10	21.41	70.5016	4.7417	7	0	4	0	23
K9EYC8	Uncharacterized protein OS=Actinobaculum massiliense ACS-171-V-Col2 OX=883066 GN=HMPREF9233_00065 PE=4 SV=1 - [K9EYC8_9ACTO]	34	10	1	10	27.49	48.4772	4.80518	6	0	4	0	24
Q839V7	Glutamate--tRNA ligase OS=Enterococcus faecalis (strain ATCC 700802 / V583) GN=gltX PE=3 SV=1 - [SYE_ENTFA]	34	9	1	8	20.82	55.3278	5.04639	0	0	32	2	0
Q831C0	Glyoxalase family protein OS=Enterococcus faecalis (strain ATCC 700802 / V583) GN=EF_2591 PE=4 SV=1 - [Q831C0_ENTFA]	34	10	1	10	58.18	31.6952	4.91943	0	0	32	2	0
K9EGX8	Ribose 5-phosphate isomerase OS=Actinobaculum massiliense ACS-171-V-Col2 OX=883066 GN=HMPREF9233_00932 PE=4 SV=1 - [K9EGX8_9ACTO]	34	4	1	4	36.77	16.6721	4.729	0	0	10	0	24
Q1R613	50S ribosomal protein L16 OS=Escherichia coli (strain UTI89 / UPEC) GN=rplP PE=3 SV=1 - [RL16_ECOUT]	33	3	1	2	32.35	15.2715	11.2241	10	5	0	18	0
Q1R610	50S ribosomal protein L22 OS=Escherichia coli (strain UTI89 / UPEC) GN=rplV PE=3 SV=1 - [RL22_ECOUT]	33	3	1	1	40	12.2188	10.228	14	0	0	19	0
Q1R4G7	Branched-chain-amino-acid aminotransferase OS=Escherichia coli (strain UTI89 / UPEC) GN=ilvE PE=3 SV=1 - [Q1R4G7_ECOUT]	33	4	1	2	19.74	34.0531	5.79541	10	0	13	10	0
Q1RE25	Leucine-responsive regulatory protein OS=Escherichia coli (strain UTI89 / UPEC) GN=lrp PE=4 SV=1 - [Q1RE25_ECOUT]	33	7	1	2	42.86	20.944	8.73389	17	6	0	10	0
Q1RG75	Dihydrolipoyl dehydrogenase OS=Escherichia coli (strain UTI89 / UPEC) GN=lpdA PE=3 SV=1 - [Q1RG75_ECOUT]	33	10	1	6	28.69	53.0958	6.44287	12	0	0	21	0
Q1RC41	Thiol peroxidase OS=Escherichia coli (strain UTI89 / UPEC) GN=tpx PE=3 SV=1 - [Q1RC41_ECOUT]	33	4	1	4	39.29	17.8242	4.91943	3	0	0	30	0
Q1R8R6	Transaldolase OS=Escherichia coli (strain UTI89 / UPEC) GN=talA PE=3 SV=1 - [Q1R8R6_ECOUT]	33	6	1	2	25.95	35.6045	6.26514	7	1	1	24	0
Q830Q7	50S ribosomal protein L10 OS=Enterococcus faecalis (strain ATCC 700802 / V583) GN=rplJ PE=3 SV=1 - [RL10_ENTFA]	33	5	1	5	30.12	17.6115	5.43994	3	2	14	14	0
Q839Y6	50S ribosomal protein L9 OS=Enterococcus faecalis (strain ATCC 700802 / V583) GN=rplI PE=3 SV=1 - [RL9_ENTFA]	33	7	1	6	40	16.575	9.5249	2	0	17	14	0
B4F0E6	ATP synthase gamma chain OS=Proteus mirabilis (strain HI4320) OX=529507 GN=atpG PE=3 SV=1 - [ATPG_PROMH]	33	7	1	4	29.97	31.6384	6.15088	11	1	15	6	0
B4F1K3	50S ribosomal protein L15 OS=Proteus mirabilis (strain HI4320) OX=529507 GN=rplO PE=3 SV=1 - [RL15_PROMH]	33	7	1	6	47.92	15.2033	10.9604	13	1	7	12	0
B4EU69	Efflux pump membrane transporter OS=Proteus mirabilis (strain HI4320) OX=529507 GN=acrB PE=3 SV=1 - [B4EU69_PROMH]	33	11	1	11	11.88	113.935	5.2876	6	0	18	9	0
F2I5Z3	Thioredoxin OS=Aerococcus urinae (strain ACS-120-V-Col10a) GN=HMPREF9243_0115 PE=3 SV=1 - [F2I5Z3_AERUA]	33	4	1	4	43.69	11.6689	4.52588	16	17	0	0	0
F2I4J0	Pyridine nucleotide-disulfide oxidoreductase OS=Aerococcus urinae (strain ACS-120-V-Col10a) GN=HMPREF9243_0947 PE=4 SV=1 - [F2I4J0_AERUA]	33	7	2	7	23.25	49.9616	4.67822	22	11	0	0	0
F2I649	Lipoprotein OS=Aerococcus urinae (strain ACS-120-V-Col10a) GN=HMPREF9243_1473 PE=3 SV=1 - [F2I649_AERUA]	33	3	1	3	13.06	31.977	4.57666	23	10	0	0	0
F2I7R6	30S ribosomal protein S10 OS=Aerococcus urinae (strain ACS-120-V-Col10a) GN=rpsJ PE=3 SV=1 - [F2I7R6_AERUA]	33	3	1	3	36.27	11.6264	10.0522	16	16	1	0	0
F2I8Z9	Pyridoxal 5'-phosphate synthase subunit PdxS OS=Aerococcus urinae (strain ACS-120-V-Col10a) GN=pdxS PE=3 SV=1 - [F2I8Z9_AERUA]	33	6	1	6	26.8	31.2401	5.12256	22	11	0	0	0
F2I6K4	Aspartate-semialdehyde dehydrogenase OS=Aerococcus urinae (strain ACS-120-V-Col10a) GN=asd PE=3 SV=1 - [F2I6K4_AERUA]	33	5	1	5	21.04	38.4976	4.93213	17	16	0	0	0
K9F186	DNA topoisomerase 1 OS=Actinobaculum massiliense ACS-171-V-Col2 OX=883066 GN=topA PE=3 SV=1 - [K9F186_9ACTO]	33	11	1	11	17.95	102.48	8.71924	10	1	0	0	22
K9EF86	Uncharacterized protein OS=Actinobaculum massiliense ACS-171-V-Col2 OX=883066 GN=HMPREF9233_01064 PE=4 SV=1 - [K9EF86_9ACTO]	33	7	1	7	47.41	28.5528	4.93213	18	1	2	0	12
K9EHJ1	Signal recognition particle protein OS=Actinobaculum massiliense ACS-171-V-Col2 OX=883066 GN=ffh PE=3 SV=1 - [K9EHJ1_9ACTO]	33	10	1	10	27.71	58.1088	9.27588	15	0	0	0	18
K9EUJ8	Uncharacterized protein OS=Actinobaculum massiliense ACS-171-V-Col2 OX=883066 GN=HMPREF9233_01624 PE=4 SV=1 - [K9EUJ8_9ACTO]	33	5	1	5	47.92	10.3429	4.75439	6	6	5	5	11
K9EHX7	30S ribosomal protein S6 OS=Actinobaculum massiliense ACS-171-V-Col2 OX=883066 GN=rpsF PE=3 SV=1 - [K9EHX7_9ACTO]	33	1	1	1	14.43	11.385	7.25439	10	6	4	8	5
K9EF87	NAD(P)(+) transhydrogenase (AB-specific), alpha subunit OS=Actinobaculum massiliense ACS-171-V-Col2 OX=883066 GN=HMPREF9233_01493 PE=4 SV=1 - [K9EF87_9ACTO]	33	9	1	9	24.56	54.256	5.49072	8	1	0	1	23
Q82Z22	Oxidoreductase, pyridine nucleotide-disulfide family OS=Enterococcus faecalis (strain ATCC 700802 / V583) GN=EF_3257 PE=4 SV=1 - [Q82Z22_ENTFA]	33	10	1	10	20.83	71.7326	7.26904	0	0	24	9	0
Q1R5A8	Putative heme/hemoglobin transport protein OS=Escherichia coli (strain UTI89 / UPEC) GN=chuS PE=4 SV=1 - [Q1R5A8_ECOUT]	32	5	1	5	21.93	38.6025	5.75732	11	14	0	7	0
Q839D8	50S ribosomal protein L17 OS=Enterococcus faecalis (strain ATCC 700802 / V583) GN=rplQ PE=3 SV=1 - [RL17_ENTFA]	32	5	1	4	37.01	14.4687	10.1401	3	10	10	9	0
B4EY60	Inosine-5'-monophosphate dehydrogenase OS=Proteus mirabilis (strain HI4320) OX=529507 GN=guaB PE=3 SV=1 - [B4EY60_PROMH]	32	7	1	3	22.75	52.0031	6.96143	15	8	9	0	0
B4EZ75	Glutathione reductase OS=Proteus mirabilis (strain HI4320) OX=529507 GN=gor PE=3 SV=1 - [B4EZ75_PROMH]	32	8	1	8	27.33	48.5919	6.41748	6	4	18	4	0
F2I815	30S ribosomal protein S11 OS=Aerococcus urinae (strain ACS-120-V-Col10a) GN=rpsK PE=3 SV=1 - [F2I815_AERUA]	32	2	1	2	21.37	14.0064	11.0044	17	15	0	0	0
F2I5E0	Single-stranded DNA-binding protein OS=Aerococcus urinae (strain ACS-120-V-Col10a) GN=HMPREF9243_0017 PE=3 SV=1 - [F2I5E0_AERUA]	32	4	1	2	25.79	20.8507	4.70361	23	9	0	0	0
F2I7R7	50S ribosomal protein L3 OS=Aerococcus urinae (strain ACS-120-V-Col10a) GN=rplC PE=3 SV=1 - [F2I7R7_AERUA]	32	5	1	5	35.55	22.6988	8.95361	26	6	0	0	0
F2I691	Dihydrolipoamide acetyltransferase component of pyruvate dehydrogenase complex OS=Aerococcus urinae (strain ACS-120-V-Col10a) GN=HMPREF9243_1525 PE=3 SV=1 - [F2I691_AERUA]	32	6	1	6	18.27	43.263	4.86865	15	17	0	0	0
K9EC48	50S ribosomal protein L24 OS=Actinobaculum massiliense ACS-171-V-Col2 OX=883066 GN=rplX PE=3 SV=1 - [K9EC48_9ACTO]	32	3	1	3	16.67	12.6499	10.4038	9	8	4	0	11
K9F2K0	Protein GrpE OS=Actinobaculum massiliense ACS-171-V-Col2 OX=883066 GN=grpE PE=3 SV=1 - [K9F2K0_9ACTO]	32	4	1	4	28.37	22.2888	4.44971	9	1	1	0	21
K9ED70	S-adenosylmethionine synthase OS=Actinobaculum massiliense ACS-171-V-Col2 OX=883066 GN=metK PE=3 SV=1 - [K9ED70_9ACTO]	32	6	1	6	21.16	42.7267	5.26221	13	6	6	0	7
K9EE28	Uncharacterized protein OS=Actinobaculum massiliense ACS-171-V-Col2 OX=883066 GN=HMPREF9233_01357 PE=4 SV=1 - [K9EE28_9ACTO]	32	3	1	3	14.44	29.0865	8.01611	11	0	1	0	20
K9EXG5	Uncharacterized protein OS=Actinobaculum massiliense ACS-171-V-Col2 OX=883066 GN=HMPREF9233_00469 PE=4 SV=1 - [K9EXG5_9ACTO]	32	5	1	5	51.23	17.7084	9.02686	9	4	1	0	18
K9F218	Ketol-acid reductoisomerase (NADP(+)) OS=Actinobaculum massiliense ACS-171-V-Col2 OX=883066 GN=ilvC PE=3 SV=1 - [K9F218_9ACTO]	32	4	1	4	16.37	37.3365	4.89404	10	7	1	0	14
K9EDD2	Uncharacterized protein OS=Actinobaculum massiliense ACS-171-V-Col2 OX=883066 GN=HMPREF9233_01020 PE=4 SV=1 - [K9EDD2_9ACTO]	32	2	1	2	52.31	7.42768	4.75439	0	0	0	0	32
Q1R630	50S ribosomal protein L15 OS=Escherichia coli (strain UTI89 / UPEC) GN=rplO PE=3 SV=1 - [RL15_ECOUT]	31	3	1	2	25.69	14.9573	11.1802	6	0	1	24	0
Q1R633	30S ribosomal protein S13 OS=Escherichia coli (strain UTI89 / UPEC) GN=rpsM PE=3 SV=1 - [RS13_ECOUT]	31	4	1	3	42.37	13.0913	10.7847	8	0	5	18	0
Q1RA44	6-phosphogluconate dehydrogenase, decarboxylating OS=Escherichia coli (strain UTI89 / UPEC) GN=gnd PE=3 SV=1 - [Q1RA44_ECOUT]	31	8	1	5	22.01	51.4183	5.19873	8	0	8	15	0
B4ETL7	Bifunctional polymyxin resistance protein ArnA OS=Proteus mirabilis (strain HI4320) OX=529507 GN=arnA PE=3 SV=1 - [ARNA_PROMH]	31	8	2	8	16.67	74.4122	6.7124	15	0	11	5	0
B4EY76	Phosphoribosylaminoimidazole-succinocarboxamide synthase OS=Proteus mirabilis (strain HI4320) OX=529507 GN=purC PE=3 SV=1 - [PUR7_PROMH]	31	6	1	6	29.54	27.1399	5.24951	12	0	15	4	0
B4ET11	Serine transporter OS=Proteus mirabilis (strain HI4320) OX=529507 GN=sdaC PE=4 SV=1 - [B4ET11_PROMH]	31	3	1	3	8.82	48.6628	8.55811	17	0	6	8	0
B4EUV7	Alanine--tRNA ligase OS=Proteus mirabilis (strain HI4320) OX=529507 GN=alaS PE=3 SV=1 - [B4EUV7_PROMH]	31	11	1	11	19.89	97.0343	5.69385	11	0	17	3	0
F2I7R9	50S ribosomal protein L23 OS=Aerococcus urinae (strain ACS-120-V-Col10a) GN=rplW PE=3 SV=1 - [F2I7R9_AERUA]	31	2	1	2	21	11.3869	6.78564	14	17	0	0	0
F2I556	50S ribosomal protein L21 OS=Aerococcus urinae (strain ACS-120-V-Col10a) GN=rplU PE=3 SV=1 - [F2I556_AERUA]	31	3	1	3	42.16	11.185	9.30518	17	14	0	0	0
K9EX92	ATP synthase subunit b OS=Actinobaculum massiliense ACS-171-V-Col2 OX=883066 GN=atpF PE=3 SV=1 - [K9EX92_9ACTO]	31	6	1	6	40.22	19.5011	4.88135	11	3	2	2	13
K9EBP2	1-(5-phosphoribosyl)-5-[(5-phosphoribosylamino)methylideneamino] imidazole-4-carboxamide isomerase OS=Actinobaculum massiliense ACS-171-V-Col2 OX=883066 GN=hisA PE=3 SV=1 - [K9EBP2_9ACTO]	31	8	1	8	53.06	25.5923	4.76709	6	0	0	0	25
Q1R5N2	Phosphoenolpyruvate carboxykinase (ATP) OS=Escherichia coli (strain UTI89 / UPEC) GN=pckA PE=3 SV=1 - [Q1R5N2_ECOUT]	31	12	1	10	30.73	62.3784	6.06201	0	2	0	29	0
B4EU72	Putative cytoplasmic sulphur reductase OS=Proteus mirabilis (strain HI4320) OX=529507 GN=PMI0134 PE=4 SV=1 - [B4EU72_PROMH]	31	4	1	4	81.2	12.7626	4.91943	0	0	28	3	0
K9F341	Uncharacterized protein OS=Actinobaculum massiliense ACS-171-V-Col2 OX=883066 GN=HMPREF9233_00632 PE=4 SV=1 - [K9F341_9ACTO]	31	5	1	5	18.17	57.5435	4.31006	0	0	0	0	31
Q1R6H4	Polyribonucleotide nucleotidyltransferase OS=Escherichia coli (strain UTI89 / UPEC) GN=pnp PE=3 SV=2 - [PNP_ECOUT]	30	12	1	8	22.78	77.067	5.18604	14	0	0	16	0
Q1R360	30S ribosomal protein S6 OS=Escherichia coli (strain UTI89 / UPEC) GN=rpsF PE=3 SV=1 - [RS6_ECOUT]	30	4	1	1	39.69	15.1774	5.38916	17	11	0	2	0
Q836B3	UPF0297 protein EF_1202 OS=Enterococcus faecalis (strain ATCC 700802 / V583) GN=EF_1202 PE=1 SV=1 - [Y1202_ENTFA]	30	4	1	4	59.55	10.5383	5.24951	5	0	19	6	0
B4EYJ2	Single-stranded DNA-binding protein OS=Proteus mirabilis (strain HI4320) OX=529507 GN=ssb PE=3 SV=1 - [B4EYJ2_PROMH]	30	3	1	3	25.29	18.8192	5.31299	14	2	11	3	0
B4EWH9	Putative lipoprotein OS=Proteus mirabilis (strain HI4320) OX=529507 GN=PMI1349 PE=4 SV=1 - [B4EWH9_PROMH]	30	3	1	3	35.58	10.9498	9.64209	9	0	8	13	0
F2I7Z4	Methionine synthase, vitamin-B12 independent OS=Aerococcus urinae (strain ACS-120-V-Col10a) GN=HMPREF9243_1868 PE=4 SV=1 - [F2I7Z4_AERUA]	30	6	1	6	19.8	45.1418	5.5415	22	8	0	0	0
F2I7S1	30S ribosomal protein S19 OS=Aerococcus urinae (strain ACS-120-V-Col10a) GN=rpsS PE=3 SV=1 - [F2I7S1_AERUA]	30	2	2	2	23.91	10.7376	9.80322	16	13	1	0	0
F2I4R1	YqeY-like protein OS=Aerococcus urinae (strain ACS-120-V-Col10a) GN=HMPREF9243_1033 PE=4 SV=1 - [F2I4R1_AERUA]	30	4	1	4	31.97	16.4405	5.19873	20	10	0	0	0
F2I5C9	Putative glycolate oxidase, subunit GlcD OS=Aerococcus urinae (strain ACS-120-V-Col10a) GN=HMPREF9243_0004 PE=4 SV=1 - [F2I5C9_AERUA]	30	3	1	3	11.94	48.661	4.94482	15	15	0	0	0
F2I7W8	D-lactate dehydrogenase OS=Aerococcus urinae (strain ACS-120-V-Col10a) GN=HMPREF9243_1838 PE=3 SV=1 - [F2I7W8_AERUA]	30	7	2	7	30.82	36.2228	4.98291	24	6	0	0	0
K9EDG8	Aspartokinase OS=Actinobaculum massiliense ACS-171-V-Col2 OX=883066 GN=HMPREF9233_01045 PE=3 SV=1 - [K9EDG8_9ACTO]	30	7	1	7	20.7	50.5515	6.29053	10	0	1	0	19
K9EDH1	HAD hydrolase, family IIA OS=Actinobaculum massiliense ACS-171-V-Col2 OX=883066 GN=HMPREF9233_01695 PE=4 SV=1 - [K9EDH1_9ACTO]	30	6	1	6	24.7	35.418	4.98291	9	0	0	0	21
B4EZ63	Peptidyl-prolyl cis-trans isomerase OS=Proteus mirabilis (strain HI4320) OX=529507 GN=ppiA PE=3 SV=1 - [B4EZ63_PROMH]	30	7	1	7	53.68	20.8867	8.57275	0	2	27	1	0
H7C6V6	Catabolite control protein A OS=Enterococcus faecalis (strain ATCC 700802 / V583) GN=ccpA PE=4 SV=1 - [H7C6V6_ENTFA]	30	7	1	7	26.43	36.1909	5.40186	0	0	24	6	0
Q1R4Z9	Mannitol-specific PTS system enzyme IIABC components OS=Escherichia coli (strain UTI89 / UPEC) GN=mtlA PE=4 SV=1 - [Q1R4Z9_ECOUT]	30	9	1	9	17.74	67.9426	6.49365	0	0	0	30	0
Q1R5J3	Aspartate-semialdehyde dehydrogenase OS=Escherichia coli (strain UTI89 / UPEC) GN=asd PE=3 SV=1 - [Q1R5J3_ECOUT]	29	9	1	6	40.57	42.3106	5.46533	1	0	0	28	0
Q1R312	Uncharacterized protein OS=Escherichia coli (strain UTI89 / UPEC) GN=yjgF PE=4 SV=1 - [Q1R312_ECOUT]	29	4	2	4	37.5	16.5097	7.95752	10	2	0	17	0
Q835U8	Translation initiation factor IF-2 OS=Enterococcus faecalis (strain ATCC 700802 / V583) GN=infB PE=3 SV=1 - [IF2_ENTFA]	29	6	1	6	8.02	88.0931	7.28369	6	5	16	2	0
B4EV71	Glutamine--tRNA ligase OS=Proteus mirabilis (strain HI4320) OX=529507 GN=glnS PE=3 SV=1 - [SYQ_PROMH]	29	7	2	6	20.9	64.084	5.73193	19	1	7	2	0
B4EX26	Biotin carboxylase OS=Proteus mirabilis (strain HI4320) OX=529507 GN=accC PE=4 SV=1 - [B4EX26_PROMH]	29	7	2	7	18.49	49.2392	6.63916	9	1	15	4	0
B4EX86	Universal stress protein OS=Proteus mirabilis (strain HI4320) OX=529507 GN=uspG2 PE=3 SV=1 - [B4EX86_PROMH]	29	4	1	4	38.73	15.4483	6.16357	10	4	10	5	0
B4F2B3	ATP-dependent zinc metalloprotease FtsH OS=Proteus mirabilis (strain HI4320) OX=529507 GN=ftsH PE=3 SV=1 - [B4F2B3_PROMH]	29	13	1	10	30.5	70.936	5.8335	3	0	24	2	0
B4ESR0	Dihydrolipoyllysine-residue succinyltransferase component of 2-oxoglutarate dehydrogenase complex OS=Proteus mirabilis (strain HI4320) OX=529507 GN=sucB PE=3 SV=1 - [B4ESR0_PROMH]	29	9	1	9	36.07	43.5527	5.77002	3	0	22	4	0
B4F1C6	Putative tellurite resistance protein OS=Proteus mirabilis (strain HI4320) OX=529507 GN=PMI2116 PE=4 SV=1 - [B4F1C6_PROMH]	29	3	1	3	16.2	32.0092	5.65576	2	2	10	15	0
B4F0Y7	Acetyltransferase component of pyruvate dehydrogenase complex OS=Proteus mirabilis (strain HI4320) OX=529507 GN=aceF PE=3 SV=1 - [B4F0Y7_PROMH]	29	9	1	8	19.81	65.4701	4.97021	7	3	16	3	0
B4EZE5	PTS system EIIA component OS=Proteus mirabilis (strain HI4320) OX=529507 GN=PMI1777 PE=4 SV=1 - [B4EZE5_PROMH]	29	5	1	5	43.54	16.2446	4.91943	4	0	15	10	0
B4EX47	Cysteine desulfurase OS=Proteus mirabilis (strain HI4320) OX=529507 GN=sufS PE=3 SV=1 - [B4EX47_PROMH]	29	8	1	8	29.3	45.4732	6.69775	1	0	20	8	0
B4EXP9	Putative membrane protein OS=Proteus mirabilis (strain HI4320) OX=529507 GN=PMI3699 PE=4 SV=1 - [B4EXP9_PROMH]	29	2	1	2	24.75	11.0387	6.12549	13	7	7	2	0
F2I6H6	Triosephosphate isomerase OS=Aerococcus urinae (strain ACS-120-V-Col10a) GN=tpiA PE=3 SV=1 - [F2I6H6_AERUA]	29	2	1	2	9.21	24.3331	4.70361	12	17	0	0	0
F2I4L9	3-oxoacyl-[acyl-carrier-protein] reductase OS=Aerococcus urinae (strain ACS-120-V-Col10a) GN=fabG PE=4 SV=1 - [F2I4L9_AERUA]	29	4	1	4	21.4	26.1495	7.95752	12	17	0	0	0
F2I8I1	Xanthine phosphoribosyltransferase OS=Aerococcus urinae (strain ACS-120-V-Col10a) GN=xpt PE=3 SV=1 - [F2I8I1_AERUA]	29	2	1	2	16.06	21.06	5.12256	12	17	0	0	0
F2I6X2	UTP--glucose-1-phosphate uridylyltransferase OS=Aerococcus urinae (strain ACS-120-V-Col10a) GN=galU PE=3 SV=1 - [F2I6X2_AERUA]	29	4	1	4	17.53	32.694	4.99561	17	12	0	0	0
K9EEE4	Homoserine dehydrogenase OS=Actinobaculum massiliense ACS-171-V-Col2 OX=883066 GN=HMPREF9233_00396 PE=3 SV=1 - [K9EEE4_9ACTO]	29	9	1	9	32.29	46.6911	5.33838	6	0	3	1	19
K9EGD2	6-phosphofructokinase OS=Actinobaculum massiliense ACS-171-V-Col2 OX=883066 GN=HMPREF9233_01355 PE=4 SV=1 - [K9EGD2_9ACTO]	29	8	1	8	19.49	85.7914	5.14795	5	0	1	0	23
K9EJC9	Adenine phosphoribosyltransferase OS=Actinobaculum massiliense ACS-171-V-Col2 OX=883066 GN=apt PE=3 SV=1 - [K9EJC9_9ACTO]	29	4	1	4	29.61	18.9798	4.58936	4	0	0	0	25
K9EDZ1	Chromosomal replication initiator protein DnaA OS=Actinobaculum massiliense ACS-171-V-Col2 OX=883066 GN=dnaA PE=3 SV=1 - [K9EDZ1_9ACTO]	29	8	1	8	20.34	64.4047	5.22412	4	0	0	0	25
K9EW30	Chaperone protein ClpB OS=Actinobaculum massiliense ACS-171-V-Col2 OX=883066 GN=clpB PE=3 SV=1 - [K9EW30_9ACTO]	29	9	1	6	14.33	99.684	4.85596	11	0	0	0	18
K9EFI2	Sua5/YciO/YrdC/YwlC family protein OS=Actinobaculum massiliense ACS-171-V-Col2 OX=883066 GN=HMPREF9233_00092 PE=3 SV=1 - [K9EFI2_9ACTO]	29	5	1	5	47.55	22.2049	6.22705	11	0	0	0	18
K9EFM0	Uncharacterized protein OS=Actinobaculum massiliense ACS-171-V-Col2 OX=883066 GN=HMPREF9233_00788 PE=4 SV=1 - [K9EFM0_9ACTO]	29	8	1	8	27.49	46.9437	5.88428	4	1	3	0	21
K9EW10	Formate--tetrahydrofolate ligase OS=Actinobaculum massiliense ACS-171-V-Col2 OX=883066 GN=fhs PE=3 SV=1 - [K9EW10_9ACTO]	29	7	1	7	21.69	56.8224	5.87158	3	0	5	0	21
K9EB58	Ribonuclease PH OS=Actinobaculum massiliense ACS-171-V-Col2 OX=883066 GN=rph PE=3 SV=1 - [K9EB58_9ACTO]	29	5	1	5	29.25	27.3881	5.52881	6	0	4	0	19
K9EW15	Inorganic pyrophosphatase OS=Actinobaculum massiliense ACS-171-V-Col2 OX=883066 GN=ppa PE=3 SV=1 - [K9EW15_9ACTO]	29	4	1	4	23.6	20.563	4.91943	9	8	6	0	6
Q837R0	ATP-dependent Clp protease proteolytic subunit OS=Enterococcus faecalis (strain ATCC 700802 / V583) GN=clpP PE=3 SV=1 - [CLPP_ENTFA]	29	4	1	4	31.47	21.608	4.77979	0	2	24	3	0
Q82ZI6	30S ribosomal protein S4 OS=Enterococcus faecalis (strain ATCC 700802 / V583) GN=rpsD PE=3 SV=1 - [RS4_ENTFA]	29	6	1	6	37.44	23.2192	9.84717	0	0	19	10	0
Q831K4	GcvH family protein OS=Enterococcus faecalis (strain ATCC 700802 / V583) GN=EF_2500 PE=4 SV=1 - [Q831K4_ENTFA]	29	4	1	4	46.15	11.2287	4.15771	0	0	20	9	0
B4EX82	Uncharacterized protein OS=Proteus mirabilis (strain HI4320) OX=529507 GN=PMI1447 PE=4 SV=1 - [B4EX82_PROMH]	29	1	1	1	8.82	15.4747	5.17334	0	0	13	16	0
K9EFR9	Uncharacterized protein OS=Actinobaculum massiliense ACS-171-V-Col2 OX=883066 GN=HMPREF9233_00270 PE=4 SV=1 - [K9EFR9_9ACTO]	29	8	1	8	13.61	90.0662	6.53662	0	0	0	0	29
Q1R689	Regulator of FtsI OS=Escherichia coli (strain UTI89 / UPEC) GN=mreB PE=4 SV=1 - [Q1R689_ECOUT]	28	5	1	3	17.2	39.5165	5.47803	2	2	9	15	0
Q1RAT5	2-keto-3-deoxygluconate 6-phosphate aldolase OS=Escherichia coli (strain UTI89 / UPEC) GN=eda PE=4 SV=1 - [Q1RAT5_ECOUT]	28	5	1	4	35.21	22.2699	5.66846	2	0	3	23	0
B4EZD9	Acetate kinase OS=Proteus mirabilis (strain HI4320) OX=529507 GN=ackA PE=3 SV=1 - [ACKA_PROMH]	28	7	1	6	27	43.5063	6.32861	12	0	8	8	0
B4F1J5	50S ribosomal protein L24 OS=Proteus mirabilis (strain HI4320) OX=529507 GN=rplX PE=3 SV=1 - [RL24_PROMH]	28	4	2	4	52.88	11.3784	10.2573	10	2	8	8	0
B4F1I5	50S ribosomal protein L4 OS=Proteus mirabilis (strain HI4320) OX=529507 GN=rplD PE=3 SV=1 - [RL4_PROMH]	28	4	1	3	23.38	22.0468	9.64209	8	5	12	3	0
B4ET24	Phosphoserine aminotransferase OS=Proteus mirabilis (strain HI4320) OX=529507 GN=serC PE=3 SV=1 - [SERC_PROMH]	28	9	1	9	30.94	40.4043	5.57959	9	1	18	0	0
B4EY63	Protease II (Oligopeptidase B) OS=Proteus mirabilis (strain HI4320) OX=529507 GN=ptrB PE=4 SV=1 - [B4EY63_PROMH]	28	11	1	11	25.4	79.0333	5.40186	3	1	22	2	0
B4EU70	Multidrug efflux protein OS=Proteus mirabilis (strain HI4320) OX=529507 GN=acrA PE=3 SV=1 - [B4EU70_PROMH]	28	6	1	6	17.68	42.1862	7.98682	2	0	15	11	0
B4EVN2	Putative copper resistance protein OS=Proteus mirabilis (strain HI4320) OX=529507 GN=PMI1008 PE=4 SV=1 - [B4EVN2_PROMH]	28	4	1	4	47.69	13.9343	6.78564	1	2	20	5	0
B4F1E3	4-deoxy-L-threo-5-hexosulose-uronate ketol-isomerase OS=Proteus mirabilis (strain HI4320) OX=529507 GN=kduI PE=3 SV=1 - [B4F1E3_PROMH]	28	8	1	8	39.86	31.0664	6.21436	25	2	1	0	0
F2I784	Cysteine--tRNA ligase OS=Aerococcus urinae (strain ACS-120-V-Col10a) GN=cysS PE=3 SV=1 - [F2I784_AERUA]	28	5	1	5	12.53	53.7759	5.12256	23	5	0	0	0
F2I8J0	Histidine triad domain protein OS=Aerococcus urinae (strain ACS-120-V-Col10a) GN=HMPREF9243_0651 PE=4 SV=1 - [F2I8J0_AERUA]	28	3	1	3	28.87	16.1693	5.35107	18	10	0	0	0
F2I864	DNA-binding helix-turn-helix protein OS=Aerococcus urinae (strain ACS-120-V-Col10a) GN=HMPREF9243_0585 PE=4 SV=1 - [F2I864_AERUA]	28	2	1	2	24.35	13.1567	4.77979	25	3	0	0	0
F2I5C5	ATP-dependent Clp protease proteolytic subunit OS=Aerococcus urinae (strain ACS-120-V-Col10a) GN=clpP PE=3 SV=1 - [F2I5C5_AERUA]	28	3	1	3	29	22.0222	4.89404	22	6	0	0	0
F2I4Q1	Aspartate--tRNA(Asp/Asn) ligase OS=Aerococcus urinae (strain ACS-120-V-Col10a) GN=aspS PE=3 SV=1 - [F2I4Q1_AERUA]	28	6	1	6	15.96	66.9867	4.91943	18	10	0	0	0
F2I7T5	50S ribosomal protein L15 OS=Aerococcus urinae (strain ACS-120-V-Col10a) GN=rplO PE=3 SV=1 - [F2I7T5_AERUA]	28	2	1	2	14.38	15.6534	10.1987	13	15	0	0	0
F2I7A5	UPF0210 protein HMPREF9243_0410 OS=Aerococcus urinae (strain ACS-120-V-Col10a) GN=HMPREF9243_0410 PE=3 SV=1 - [F2I7A5_AERUA]	28	8	1	8	30.53	46.8753	5.10986	23	5	0	0	0
F2I4P9	Putative ribulose-phosphate 3-epimerase OS=Aerococcus urinae (strain ACS-120-V-Col10a) GN=HMPREF9243_1016 PE=4 SV=1 - [F2I4P9_AERUA]	28	4	1	4	29.69	26.0511	5.04639	10	18	0	0	0
K9EDU5	Protein translocase subunit SecY OS=Actinobaculum massiliense ACS-171-V-Col2 OX=883066 GN=secY PE=3 SV=1 - [K9EDU5_9ACTO]	28	3	1	3	8.53	47.8092	9.68604	6	5	1	2	14
K9EX19	Uncharacterized protein OS=Actinobaculum massiliense ACS-171-V-Col2 OX=883066 GN=HMPREF9233_00294 PE=4 SV=1 - [K9EX19_9ACTO]	28	6	1	6	24.1	34.6518	5.97314	8	0	4	0	16
K9EIH5	Uncharacterized protein OS=Actinobaculum massiliense ACS-171-V-Col2 OX=883066 GN=HMPREF9233_00468 PE=4 SV=1 - [K9EIH5_9ACTO]	28	9	1	9	26.01	59.2629	6.12549	9	0	1	0	18
K9EUN8	Uncharacterized protein OS=Actinobaculum massiliense ACS-171-V-Col2 OX=883066 GN=HMPREF9233_01669 PE=4 SV=1 - [K9EUN8_9ACTO]	28	7	1	7	31.3	28.4951	8.35303	7	1	0	0	20
K9EGT3	Uncharacterized protein OS=Actinobaculum massiliense ACS-171-V-Col2 OX=883066 GN=HMPREF9233_00887 PE=4 SV=1 - [K9EGT3_9ACTO]	28	6	1	6	46.15	23.4767	4.90674	5	0	0	0	23
K9EWW9	Uncharacterized protein OS=Actinobaculum massiliense ACS-171-V-Col2 OX=883066 GN=HMPREF9233_00807 PE=4 SV=1 - [K9EWW9_9ACTO]	28	4	1	4	30.43	26.3083	4.85596	3	3	0	0	22
Q834G9	DegV family protein, putative OS=Enterococcus faecalis (strain ATCC 700802 / V583) GN=EF_1684 PE=4 SV=1 - [Q834G9_ENTFA]	28	7	1	7	35.36	30.6617	5.51611	0	3	23	2	0
Q836V1	Isoleucine--tRNA ligase OS=Enterococcus faecalis (strain ATCC 700802 / V583) GN=ileS PE=3 SV=1 - [SYI_ENTFA]	28	8	1	8	12.63	105.788	5.09717	0	0	22	6	0
Q831X4	Asparagine--tRNA ligase OS=Enterococcus faecalis (strain ATCC 700802 / V583) GN=asnS PE=3 SV=1 - [SYN_ENTFA]	28	7	1	7	17.33	51.4597	5.08447	0	0	17	11	0
Q835L7	Dihydroxyacetone kinase family protein OS=Enterococcus faecalis (strain ATCC 700802 / V583) GN=EF_1360 PE=4 SV=1 - [Q835L7_ENTFA]	28	5	1	5	25.38	35.0629	4.93213	0	0	28	0	0
Q838R0	Uncharacterized protein OS=Enterococcus faecalis (strain ATCC 700802 / V583) GN=EF_0375 PE=1 SV=1 - [Q838R0_ENTFA]	28	11	1	8	47.66	35.4367	7.6499	0	0	28	0	0
B4EXW2	Putative exported protein OS=Proteus mirabilis (strain HI4320) OX=529507 GN=PMI1529 PE=4 SV=1 - [B4EXW2_PROMH]	28	5	1	5	54.66	18.152	5.59229	0	0	27	1	0
K9EGK0	PPK2 family polyphosphate:nucleotide phosphotransferase OS=Actinobaculum massiliense ACS-171-V-Col2 OX=883066 GN=HMPREF9233_01144 PE=4 SV=1 - [K9EGK0_9ACTO]	28	7	1	7	25.22	38.1326	5.50342	0	0	0	0	28
K9EEU8	Uncharacterized protein OS=Actinobaculum massiliense ACS-171-V-Col2 OX=883066 GN=HMPREF9233_00964 PE=4 SV=1 - [K9EEU8_9ACTO]	28	8	1	7	28.95	55.6375	5.021	0	0	0	0	28
Q1R6A5	Periplasmic serine endoprotease DegP-like OS=Escherichia coli (strain UTI89 / UPEC) GN=degQ PE=3 SV=1 - [Q1R6A5_ECOUT]	27	3	1	1	13.01	48.7519	6.66846	27	0	0	0	0
Q1RA64	UPF0265 protein YeeX OS=Escherichia coli (strain UTI89 / UPEC) GN=yeeX PE=3 SV=1 - [Q1RA64_ECOUT]	27	2	1	2	33.59	15.1229	9.12939	18	0	0	9	0
Q1R2J2	D-mannonate oxidoreductase OS=Escherichia coli (strain UTI89 / UPEC) GN=uxuB PE=3 SV=1 - [Q1R2J2_ECOUT]	27	8	1	7	20.16	53.5809	5.51611	7	0	1	19	0
Q1RG76	Acetyltransferase component of pyruvate dehydrogenase complex OS=Escherichia coli (strain UTI89 / UPEC) GN=aceF PE=3 SV=1 - [Q1RG76_ECOUT]	27	7	1	6	12.86	66.0728	5.17334	14	3	2	8	0
Q836D0	Ribonuclease J OS=Enterococcus faecalis (strain ATCC 700802 / V583) GN=rnj PE=3 SV=1 - [Q836D0_ENTFA]	27	10	1	10	25.44	62.8428	5.92236	4	0	18	4	1
B4F1I3	30S ribosomal protein S10 OS=Proteus mirabilis (strain HI4320) OX=529507 GN=rpsJ PE=3 SV=1 - [RS10_PROMH]	27	3	1	1	33.98	11.7594	9.86182	11	1	9	6	0
B4ESY2	NAD-dependent malic enzyme OS=Proteus mirabilis (strain HI4320) OX=529507 GN=maeA PE=3 SV=1 - [MAO1_PROMH]	27	6	2	6	16.64	63.0171	5.23682	17	0	4	6	0
B4EWX2	Putative exported protein OS=Proteus mirabilis (strain HI4320) OX=529507 GN=PMI2504 PE=4 SV=1 - [B4EWX2_PROMH]	27	6	1	6	22.16	42.1061	9.26123	1	0	21	5	0
B4ETT0	NAD(P) transhydrogenase subunit alpha OS=Proteus mirabilis (strain HI4320) OX=529507 GN=pntA PE=3 SV=1 - [B4ETT0_PROMH]	27	6	1	4	16.5	54.3747	6.44287	7	1	12	7	0
B4EY78	4-hydroxy-tetrahydrodipicolinate synthase OS=Proteus mirabilis (strain HI4320) OX=529507 GN=dapA PE=3 SV=1 - [B4EY78_PROMH]	27	6	1	6	32.78	32.1545	5.33838	3	1	15	8	0
B4EU50	Putative lipoprotein OS=Proteus mirabilis (strain HI4320) OX=529507 GN=PMI0112 PE=4 SV=1 - [B4EU50_PROMH]	27	5	1	5	33.85	20.6206	9.23193	13	0	11	3	0
B4EZG2	3-oxoacyl-[acyl-carrier-protein] synthase I OS=Proteus mirabilis (strain HI4320) OX=529507 GN=fabB PE=3 SV=1 - [B4EZG2_PROMH]	27	8	1	7	26.3	42.6151	5.68115	4	2	14	7	0
F2I817	50S ribosomal protein L17 OS=Aerococcus urinae (strain ACS-120-V-Col10a) GN=rplQ PE=3 SV=1 - [F2I817_AERUA]	27	2	1	1	15.87	14.4738	9.979	6	10	6	5	0
F2I5F3	Aminotransferase OS=Aerococcus urinae (strain ACS-120-V-Col10a) GN=HMPREF9243_1344 PE=3 SV=1 - [F2I5F3_AERUA]	27	4	1	4	15.27	43.122	5.22412	17	10	0	0	0
K9EFA9	Uncharacterized protein OS=Actinobaculum massiliense ACS-171-V-Col2 OX=883066 GN=HMPREF9233_01528 PE=4 SV=1 - [K9EFA9_9ACTO]	27	4	1	4	30	22.0341	4.57666	13	4	2	0	8
K9EI66	Tryptophan-tRNA ligase OS=Actinobaculum massiliense ACS-171-V-Col2 OX=883066 GN=HMPREF9233_00363 PE=3 SV=1 - [K9EI66_9ACTO]	27	7	1	7	24.86	40.2596	5.51611	2	0	0	0	25
K9EFX7	Uncharacterized protein OS=Actinobaculum massiliense ACS-171-V-Col2 OX=883066 GN=HMPREF9233_00345 PE=4 SV=1 - [K9EFX7_9ACTO]	27	7	1	7	30.23	39.5965	5.24951	2	0	0	0	25
K9ECZ0	30S ribosomal protein S20 OS=Actinobaculum massiliense ACS-171-V-Col2 OX=883066 GN=rpsT PE=3 SV=1 - [K9ECZ0_9ACTO]	27	2	1	2	22.73	9.93753	10.8872	3	6	4	0	14
K9EC82	Universal bacterial protein YeaZ OS=Actinobaculum massiliense ACS-171-V-Col2 OX=883066 GN=HMPREF9233_01313 PE=4 SV=1 - [K9EC82_9ACTO]	27	6	1	6	48.29	24.9338	4.44971	3	0	0	0	24
K9EHW9	ParB-like partition protein OS=Actinobaculum massiliense ACS-171-V-Col2 OX=883066 GN=HMPREF9233_00786 PE=3 SV=1 - [K9EHW9_9ACTO]	27	9	1	9	27.89	47.6966	5.5542	5	0	0	0	22
Q837T8	Uncharacterized protein OS=Enterococcus faecalis (strain ATCC 700802 / V583) GN=EF_0742 PE=4 SV=1 - [Q837T8_ENTFA]	27	7	1	7	71.09	14.9655	4.34814	0	0	26	1	0
Q830B1	Malonyl CoA-acyl carrier protein transacylase OS=Enterococcus faecalis (strain ATCC 700802 / V583) GN=fabD PE=3 SV=1 - [Q830B1_ENTFA]	27	7	1	7	36.89	33.5602	5.08447	0	0	24	3	0
B4F2F8	Protease III OS=Proteus mirabilis (strain HI4320) OX=529507 GN=ptrA PE=3 SV=1 - [B4F2F8_PROMH]	27	11	1	11	14.45	108.7	5.49072	0	0	26	1	0
Q1RDV1	Phosphoserine aminotransferase OS=Escherichia coli (strain UTI89 / UPEC) GN=serC PE=3 SV=1 - [SERC_ECOUT]	26	7	1	6	25.41	39.7469	5.36377	5	0	0	21	0
Q1R457	Uncharacterized protein OS=Escherichia coli (strain UTI89 / UPEC) GN=yihD PE=4 SV=1 - [Q1R457_ECOUT]	26	3	1	3	47.47	11.383	6.12549	16	2	0	8	0
Q1RAX4	PTS system, mannose-specific IIAB component OS=Escherichia coli (strain UTI89 / UPEC) GN=manX PE=4 SV=1 - [Q1RAX4_ECOUT]	26	7	1	7	33.44	35.0555	6.02393	4	0	0	22	0
B4ESJ0	Glucosamine-6-phosphate deaminase OS=Proteus mirabilis (strain HI4320) OX=529507 GN=nagB PE=3 SV=1 - [NAGB_PROMH]	26	5	1	5	33.21	29.8942	6.63916	10	0	12	4	0
B4F102	Protein translocase subunit SecA OS=Proteus mirabilis (strain HI4320) OX=529507 GN=secA PE=3 SV=1 - [SECA_PROMH]	26	10	1	8	16.19	102.509	5.65576	14	0	12	0	0
B4F249	Proline--tRNA ligase OS=Proteus mirabilis (strain HI4320) OX=529507 GN=proS PE=3 SV=1 - [SYP_PROMH]	26	8	1	6	19.26	63.8388	5.2876	16	0	9	1	0
B4EVW6	Putative aminotransferase OS=Proteus mirabilis (strain HI4320) OX=529507 GN=PMI1275 PE=4 SV=1 - [B4EVW6_PROMH]	26	4	1	4	11.57	44.5744	6.78564	22	4	0	0	0
B4F0Y1	Putative mechanosensitive ion channel protein OS=Proteus mirabilis (strain HI4320) OX=529507 GN=PMI2038 PE=4 SV=1 - [B4F0Y1_PROMH]	26	6	1	6	24.83	31.3898	6.96143	12	2	10	2	0
B4EY55	Aerobic respiration control protein OS=Proteus mirabilis (strain HI4320) OX=529507 GN=arcA PE=4 SV=1 - [B4EY55_PROMH]	26	4	2	4	26.89	27.294	5.8208	12	3	9	2	0
B4EW90	PTS-dependent dihydroxyacetone kinase, dihydroxyacetone-binding subunit OS=Proteus mirabilis (strain HI4320) OX=529507 GN=dhaK PE=4 SV=1 - [B4EW90_PROMH]	26	6	1	6	28.25	38.2052	5.19873	3	2	20	1	0
B4EUZ5	Ribonucleoside-diphosphate reductase OS=Proteus mirabilis (strain HI4320) OX=529507 GN=nrdE PE=3 SV=1 - [B4EUZ5_PROMH]	26	5	1	2	9.18	80.8828	7.51807	4	0	2	20	0
B4ETB6	Quinone-dependent D-lactate dehydrogenase OS=Proteus mirabilis (strain HI4320) OX=529507 GN=dld PE=3 SV=1 - [B4ETB6_PROMH]	26	6	1	6	18.17	66.8147	6.97607	20	0	6	0	0
F2I5Z7	Putative enoyl-[acyl-carrier-protein] reductase II OS=Aerococcus urinae (strain ACS-120-V-Col10a) GN=HMPREF9243_0119 PE=4 SV=1 - [F2I5Z7_AERUA]	26	3	1	3	16.83	32.8508	4.91943	12	14	0	0	0
F2I5Z2	Putative thioredoxin-disulfide reductase OS=Aerococcus urinae (strain ACS-120-V-Col10a) GN=HMPREF9243_0114 PE=3 SV=1 - [F2I5Z2_AERUA]	26	3	1	3	13.56	33.9206	4.61475	8	18	0	0	0
F2I8X8	N-acetylglucosamine-6-phosphate deacetylase OS=Aerococcus urinae (strain ACS-120-V-Col10a) GN=nagA PE=3 SV=1 - [F2I8X8_AERUA]	26	2	1	2	7.89	40.7176	5.09717	20	6	0	0	0
F2I5P5	Serine--tRNA ligase OS=Aerococcus urinae (strain ACS-120-V-Col10a) GN=serS PE=3 SV=1 - [F2I5P5_AERUA]	26	3	1	3	10.19	48.6075	5.021	14	12	0	0	0
F2I567	ATP-dependent Clp protease ATP-binding subunit ClpX OS=Aerococcus urinae (strain ACS-120-V-Col10a) GN=clpX PE=3 SV=1 - [F2I567_AERUA]	26	6	1	6	18.66	46.534	4.77979	25	1	0	0	0
K9EVR4	HAD ATPase, P-type, family IC OS=Actinobaculum massiliense ACS-171-V-Col2 OX=883066 GN=HMPREF9233_00833 PE=4 SV=1 - [K9EVR4_9ACTO]	26	6	1	6	10.83	92.2873	5.07178	4	0	0	0	22
K9EHK6	ATP-dependent Clp protease proteolytic subunit OS=Actinobaculum massiliense ACS-171-V-Col2 OX=883066 GN=clpP PE=3 SV=1 - [K9EHK6_9ACTO]	26	3	1	3	24.68	25.6358	4.89404	14	2	2	0	8
K9EFH9	Uncharacterized protein OS=Actinobaculum massiliense ACS-171-V-Col2 OX=883066 GN=HMPREF9233_00087 PE=4 SV=1 - [K9EFH9_9ACTO]	26	4	1	4	66.67	14.5499	4.01807	6	0	2	0	18
K9EDA7	Uncharacterized protein OS=Actinobaculum massiliense ACS-171-V-Col2 OX=883066 GN=HMPREF9233_01640 PE=3 SV=1 - [K9EDA7_9ACTO]	26	8	1	8	19.15	71.9393	5.12256	8	0	1	0	17
Q837A5	ABC transporter, ATP-binding/TOBE domain protein OS=Enterococcus faecalis (strain ATCC 700802 / V583) GN=EF_0938 PE=3 SV=1 - [Q837A5_ENTFA]	26	6	1	6	22.07	41.2461	5.98584	0	10	13	1	2
Q1R801	Protein RecA OS=Escherichia coli (strain UTI89 / UPEC) GN=recA PE=3 SV=1 - [RECA_ECOUT]	26	6	1	4	24.36	37.9496	5.18604	0	5	0	21	0
Q831B5	Glycosyl hydrolase, family 1 OS=Enterococcus faecalis (strain ATCC 700802 / V583) GN=EF_2597 PE=3 SV=1 - [Q831B5_ENTFA]	26	9	1	9	28.07	54.9437	4.90674	0	2	24	0	0
K9EZ90	Pullulanase, type I OS=Actinobaculum massiliense ACS-171-V-Col2 OX=883066 GN=HMPREF9233_01497 PE=3 SV=1 - [K9EZ90_9ACTO]	26	13	1	13	16.03	133.636	4.94482	0	1	1	0	24
Q830B2	Biotin carboxyl carrier protein of acetyl-CoA carboxylase OS=Enterococcus faecalis (strain ATCC 700802 / V583) GN=accB PE=4 SV=1 - [Q830B2_ENTFA]	26	4	1	4	32.1	17.5489	4.24658	0	0	22	4	0
K9EI60	Uncharacterized protein OS=Actinobaculum massiliense ACS-171-V-Col2 OX=883066 GN=HMPREF9233_00353 PE=4 SV=1 - [K9EI60_9ACTO]	26	4	1	4	13.88	56.9118	5.19873	0	0	0	0	26
Q1RFA0	Trigger factor OS=Escherichia coli (strain UTI89 / UPEC) GN=tig PE=3 SV=1 - [TIG_ECOUT]	25	6	1	6	19.35	47.8357	4.88135	14	0	5	6	0
Q1R3V0	Starvation sensing protein RspA OS=Escherichia coli (strain UTI89 / UPEC) GN=UTI89_C4552 PE=3 SV=1 - [Q1R3V0_ECOUT]	25	4	1	2	13.86	45.8847	6.1001	25	0	0	0	0
Q1RF74	Efflux pump membrane transporter OS=Escherichia coli (strain UTI89 / UPEC) GN=acrB PE=3 SV=1 - [Q1RF74_ECOUT]	25	5	1	5	7.05	113.501	5.56689	9	0	0	16	0
B4EYW7	Peptidyl-prolyl cis-trans isomerase OS=Proteus mirabilis (strain HI4320) OX=529507 GN=slyD PE=3 SV=1 - [B4EYW7_PROMH]	25	2	1	2	16.9	22.2772	4.81787	7	4	14	0	0
F2I6B7	DAK2 domain fusion protein YloV OS=Aerococcus urinae (strain ACS-120-V-Col10a) GN=HMPREF9243_1554 PE=4 SV=1 - [F2I6B7_AERUA]	25	7	1	6	17.3	59.7907	4.53857	11	13	1	0	0
F2I4M1	Biotin carboxyl carrier protein of acetyl-CoA carboxylase OS=Aerococcus urinae (strain ACS-120-V-Col10a) GN=accB PE=4 SV=1 - [F2I4M1_AERUA]	25	2	1	2	13.75	17.7648	4.4624	11	14	0	0	0
F2I4T8	PTS system, glucose-like IIB component OS=Aerococcus urinae (strain ACS-120-V-Col10a) GN=HMPREF9243_1064 PE=4 SV=1 - [F2I4T8_AERUA]	25	6	1	6	9.23	76.7454	5.69385	13	12	0	0	0
F2I8K2	Phosphoglycerate mutase family protein OS=Aerococcus urinae (strain ACS-120-V-Col10a) GN=HMPREF9243_0663 PE=4 SV=1 - [F2I8K2_AERUA]	25	4	1	4	26.32	26.1816	4.97021	22	3	0	0	0
K9F1V3	Thioredoxin reductase OS=Actinobaculum massiliense ACS-171-V-Col2 OX=883066 GN=HMPREF9233_00790 PE=3 SV=1 - [K9F1V3_9ACTO]	25	5	1	5	19.39	38.3479	4.81787	5	0	3	0	17
K9EXG9	ATP-dependent zinc metalloprotease FtsH OS=Actinobaculum massiliense ACS-171-V-Col2 OX=883066 GN=ftsH PE=3 SV=1 - [K9EXG9_9ACTO]	25	8	2	8	13.99	88.0309	5.59229	1	0	0	0	24
K9EG54	50S ribosomal protein L30 OS=Actinobaculum massiliense ACS-171-V-Col2 OX=883066 GN=rpmD PE=3 SV=1 - [K9EG54_9ACTO]	25	2	1	2	33.9	6.56266	9.979	7	6	5	0	7
K9F228	Uncharacterized protein OS=Actinobaculum massiliense ACS-171-V-Col2 OX=883066 GN=HMPREF9233_00322 PE=4 SV=1 - [K9F228_9ACTO]	25	10	1	10	33.62	48.0443	5.021	6	0	0	0	19
K9EFA7	Uncharacterized protein OS=Actinobaculum massiliense ACS-171-V-Col2 OX=883066 GN=HMPREF9233_00666 PE=4 SV=1 - [K9EFA7_9ACTO]	25	13	1	13	14.61	136.714	4.71631	1	0	0	0	24
K9EFU8	UPF0210 protein HMPREF9233_00212 OS=Actinobaculum massiliense ACS-171-V-Col2 OX=883066 GN=HMPREF9233_00212 PE=3 SV=1 - [K9EFU8_9ACTO]	25	8	1	8	23.78	45.7316	5.22412	2	1	1	0	21
K9EUC4	DNA polymerase I OS=Actinobaculum massiliense ACS-171-V-Col2 OX=883066 GN=polA PE=3 SV=1 - [K9EUC4_9ACTO]	25	8	1	8	15.48	98.6655	5.12256	4	0	0	0	21
Q834M4	Phosphate propanoyltransferase OS=Enterococcus faecalis (strain ATCC 700802 / V583) GN=pduL PE=3 SV=1 - [PDUL_ENTFA]	25	6	1	6	35.55	23.2941	8.01611	0	6	19	0	0
Q830L7	Uncharacterized protein OS=Enterococcus faecalis (strain ATCC 700802 / V583) GN=EF_2763 PE=4 SV=1 - [Q830L7_ENTFA]	25	4	1	4	39.45	11.9741	4.84326	0	3	15	7	0
B4EV14	Leucine--tRNA ligase OS=Proteus mirabilis (strain HI4320) OX=529507 GN=leuS PE=3 SV=1 - [SYL_PROMH]	25	9	1	9	13.37	97.7194	5.26221	0	1	12	12	0
Q82ZC7	PTS system, IIB component OS=Enterococcus faecalis (strain ATCC 700802 / V583) GN=EF_3137 PE=4 SV=1 - [Q82ZC7_ENTFA]	25	6	1	6	37.5	18.9901	8.47021	0	2	14	9	0
Q820T5	3-hydroxyacyl-[acyl-carrier-protein] dehydratase FabZ OS=Enterococcus faecalis (strain ATCC 700802 / V583) GN=fabZ2 PE=3 SV=1 - [FABZ2_ENTFA]	25	3	1	3	31.91	15.2333	8.90967	0	0	25	0	0
P52329	RNA polymerase sigma factor SigA OS=Enterococcus faecalis (strain ATCC 700802 / V583) GN=sigA PE=3 SV=2 - [SIGA_ENTFA]	25	5	1	5	19.84	41.7998	5.13525	0	0	23	2	0
B4EU80	Carbon starvation protein OS=Proteus mirabilis (strain HI4320) OX=529507 GN=cstA PE=4 SV=1 - [B4EU80_PROMH]	25	6	1	6	12.99	77.1543	8.79248	0	0	20	5	0
K9EY96	Uncharacterized protein OS=Actinobaculum massiliense ACS-171-V-Col2 OX=883066 GN=HMPREF9233_00010 PE=4 SV=1 - [K9EY96_9ACTO]	25	4	1	4	28.06	27.9639	5.16064	0	0	3	0	22
Q1R2Z4	Probable cytosol aminopeptidase OS=Escherichia coli (strain UTI89 / UPEC) GN=pepA PE=3 SV=1 - [AMPA_ECOUT]	24	4	1	1	9.34	54.845	7.2251	15	6	0	3	0
Q1R609	30S ribosomal protein S19 OS=Escherichia coli (strain UTI89 / UPEC) GN=rpsS PE=3 SV=1 - [RS19_ECOUT]	24	2	1	1	11.96	10.4237	10.521	12	4	8	0	0
Q1R5T6	Peptidyl-prolyl cis-trans isomerase OS=Escherichia coli (strain UTI89 / UPEC) GN=fkpA PE=3 SV=1 - [Q1R5T6_ECOUT]	24	5	1	5	24.07	28.8942	8.47021	8	2	0	14	0
Q1R3W6	Glycerol dehydrogenase OS=Escherichia coli (strain UTI89 / UPEC) GN=gldA PE=4 SV=1 - [Q1R3W6_ECOUT]	24	7	1	7	26.32	40.1085	4.98291	4	2	1	17	0
Q1R8F3	Autonomous glycyl radical cofactor OS=Escherichia coli (strain UTI89 / UPEC) GN=yfiD PE=3 SV=1 - [Q1R8F3_ECOUT]	24	3	1	2	30.08	14.9748	5.84619	9	6	0	9	0
Q1R329	Inorganic pyrophosphatase OS=Escherichia coli (strain UTI89 / UPEC) GN=ppa PE=3 SV=1 - [Q1R329_ECOUT]	24	4	1	2	22.16	19.7191	5.17334	9	8	0	7	0
Q1R823	Ribonucleoside-diphosphate reductase OS=Escherichia coli (strain UTI89 / UPEC) GN=nrdE PE=3 SV=1 - [Q1R823_ECOUT]	24	4	1	1	7.28	80.3292	6.46826	4	0	0	20	0
B4F2B9	Translation initiation factor IF-2 OS=Proteus mirabilis (strain HI4320) OX=529507 GN=infB PE=3 SV=1 - [IF2_PROMH]	24	9	1	8	12.34	101.01	6.12549	14	0	10	0	0
B4F1L3	Large-conductance mechanosensitive channel OS=Proteus mirabilis (strain HI4320) OX=529507 GN=mscL PE=3 SV=1 - [MSCL_PROMH]	24	2	1	2	25.19	14.861	6.1001	11	0	2	11	0
B4ESR1	Succinate--CoA ligase [ADP-forming] subunit beta OS=Proteus mirabilis (strain HI4320) OX=529507 GN=sucC PE=3 SV=1 - [SUCC_PROMH]	24	8	1	6	23.45	41.5056	5.19873	1	0	15	8	0
B4EWA3	Thymidine phosphorylase OS=Proteus mirabilis (strain HI4320) OX=529507 GN=deoA PE=3 SV=1 - [TYPH_PROMH]	24	9	1	9	25.91	47.4722	5.36377	11	2	9	2	0
B4F2B8	Transcription termination/antitermination protein NusA OS=Proteus mirabilis (strain HI4320) OX=529507 GN=nusA PE=3 SV=1 - [B4F2B8_PROMH]	24	6	1	6	15.34	55.8707	4.62744	12	0	12	0	0
B4EU15	Protein translocase subunit SecD OS=Proteus mirabilis (strain HI4320) OX=529507 GN=secD PE=3 SV=1 - [B4EU15_PROMH]	24	7	1	7	13.98	67.0319	8.60205	12	0	12	0	0
F2I4K7	Alanine--tRNA ligase OS=Aerococcus urinae (strain ACS-120-V-Col10a) GN=alaS PE=3 SV=1 - [F2I4K7_AERUA]	24	8	1	8	12.34	99.4669	4.94482	11	13	0	0	0
F2I7N7	Putative bacteriocin transport accessory protein OS=Aerococcus urinae (strain ACS-120-V-Col10a) GN=HMPREF9243_0479 PE=4 SV=1 - [F2I7N7_AERUA]	24	3	1	3	31.4	13.4869	4.60205	19	5	0	0	0
F2I4J1	Putative potassium/sodium efflux P-type ATPase, fungal-type OS=Aerococcus urinae (strain ACS-120-V-Col10a) GN=HMPREF9243_0948 PE=4 SV=1 - [F2I4J1_AERUA]	24	5	1	5	8.64	99.673	4.67822	17	7	0	0	0
F2I8J8	UDP-N-acetylmuramate--L-alanine ligase OS=Aerococcus urinae (strain ACS-120-V-Col10a) GN=murC PE=3 SV=1 - [F2I8J8_AERUA]	24	4	1	4	10.62	50.6289	5.16064	12	12	0	0	0
F2I6T8	PTS system, glucitol/sorbitol-specific, IIBC component OS=Aerococcus urinae (strain ACS-120-V-Col10a) GN=HMPREF9243_0309 PE=4 SV=1 - [F2I6T8_AERUA]	24	5	1	5	21.83	35.1175	4.93213	18	6	0	0	0
F2I4Z3	Chaperone protein DnaJ OS=Aerococcus urinae (strain ACS-120-V-Col10a) GN=dnaJ PE=3 SV=1 - [F2I4Z3_AERUA]	24	4	1	4	16.32	41.8887	8.06006	10	14	0	0	0
F2I7S7	50S ribosomal protein L14 OS=Aerococcus urinae (strain ACS-120-V-Col10a) GN=rplN PE=3 SV=1 - [F2I7S7_AERUA]	24	3	1	3	29.51	13.1511	9.77393	13	11	0	0	0
K9EB66	Uncharacterized protein OS=Actinobaculum massiliense ACS-171-V-Col2 OX=883066 GN=HMPREF9233_01451 PE=4 SV=1 - [K9EB66_9ACTO]	24	5	1	5	44.69	19.5239	5.19873	5	1	1	1	16
K9ECX2	Thioredoxin OS=Actinobaculum massiliense ACS-171-V-Col2 OX=883066 GN=HMPREF9233_01475 PE=3 SV=1 - [K9ECX2_9ACTO]	24	3	1	3	44	13.7508	4.52588	9	3	6	0	6
K9EHM2	Uncharacterized protein OS=Actinobaculum massiliense ACS-171-V-Col2 OX=883066 GN=HMPREF9233_00706 PE=4 SV=1 - [K9EHM2_9ACTO]	24	5	1	5	28.57	29.2582	8.96826	20	3	1	0	0
K9ED92	Uncharacterized protein OS=Actinobaculum massiliense ACS-171-V-Col2 OX=883066 GN=HMPREF9233_01620 PE=3 SV=1 - [K9ED92_9ACTO]	24	7	1	7	18.32	67.0512	5.30029	9	0	2	0	13
Q93EU7	10 kDa chaperonin OS=Enterococcus faecalis (strain ATCC 700802 / V583) GN=groS PE=3 SV=2 - [CH10_ENTFA]	24	4	1	4	45.74	10.1585	5.04639	0	1	18	5	0
Q837V2	Aspartyl/glutamyl-tRNA(Asn/Gln) amidotransferase subunit B OS=Enterococcus faecalis (strain ATCC 700802 / V583) GN=gatB PE=3 SV=1 - [GATB_ENTFA]	24	8	1	8	27.31	53.2859	5.07178	0	0	18	6	0
Q835U7	Ribosome-binding factor A OS=Enterococcus faecalis (strain ATCC 700802 / V583) GN=rbfA PE=3 SV=1 - [RBFA_ENTFA]	24	3	1	3	36.21	13.4801	8.39697	0	0	21	3	0
Q839G3	50S ribosomal protein L4 OS=Enterococcus faecalis (strain ATCC 700802 / V583) GN=rplD PE=3 SV=1 - [RL4_ENTFA]	24	4	1	4	27.05	22.507	9.93506	0	0	12	12	0
Q830B3	Acetyl-CoA carboxylase, biotin carboxylase OS=Enterococcus faecalis (strain ATCC 700802 / V583) GN=accC PE=4 SV=1 - [Q830B3_ENTFA]	24	4	1	4	12.72	49.9249	4.85596	0	0	13	11	0
Q830A7	2-hydroxy-3-oxopropionate reductase OS=Enterococcus faecalis (strain ATCC 700802 / V583) GN=glxR PE=4 SV=1 - [Q830A7_ENTFA]	24	10	1	10	44.93	31.8113	6.25244	0	0	23	1	0
K9EU57	Uncharacterized protein OS=Actinobaculum massiliense ACS-171-V-Col2 OX=883066 GN=HMPREF9233_01444 PE=4 SV=1 - [K9EU57_9ACTO]	24	6	1	6	20.32	41.0589	4.86865	0	0	5	0	19
Q1R8I3	Flavohemoprotein OS=Escherichia coli (strain UTI89 / UPEC) GN=hmpA PE=3 SV=1 - [Q1R8I3_ECOUT]	24	5	1	5	14.14	43.837	5.77002	0	0	0	24	0
Q1RAG3	Putative ABC transporter protein OS=Escherichia coli (strain UTI89 / UPEC) GN=UTI89_C2180 PE=4 SV=1 - [Q1RAG3_ECOUT]	24	6	1	6	11.99	67.6895	7.7085	0	0	0	24	0
K9F0C9	Uncharacterized protein OS=Actinobaculum massiliense ACS-171-V-Col2 OX=883066 GN=HMPREF9233_01359 PE=3 SV=1 - [K9F0C9_9ACTO]	24	7	1	7	29.8	32.7176	5.05908	0	0	0	0	24
K9ED81	TIGR01457 family HAD hydrolase OS=Actinobaculum massiliense ACS-171-V-Col2 OX=883066 GN=HMPREF9233_00975 PE=3 SV=1 - [K9ED81_9ACTO]	24	3	1	3	22.57	27.8801	4.93213	0	0	0	0	24
Q1R6Y6	Hypothetical oxidoreductase YqhD OS=Escherichia coli (strain UTI89 / UPEC) GN=yqhD PE=4 SV=1 - [Q1R6Y6_ECOUT]	23	4	1	4	19.9	42.0608	6.12549	7	4	0	12	0
Q1REB4	Periplasmic glutamine-binding protein permease OS=Escherichia coli (strain UTI89 / UPEC) GN=glnH PE=3 SV=1 - [Q1REB4_ECOUT]	23	5	1	5	33.87	27.1732	8.51416	3	0	5	15	0
Q1REP7	N-acetylglucosamine PTS permease OS=Escherichia coli (strain UTI89 / UPEC) GN=nagE PE=4 SV=1 - [Q1REP7_ECOUT]	23	4	1	4	7.87	68.2859	6.16357	6	9	5	3	0
Q1RFT4	Aminoacyl-histidine dipeptidase (Peptidase D) OS=Escherichia coli (strain UTI89 / UPEC) GN=pepD PE=4 SV=1 - [Q1RFT4_ECOUT]	23	4	1	3	9.69	52.8851	5.32568	9	6	3	5	0
Q834C2	UTP--glucose-1-phosphate uridylyltransferase OS=Enterococcus faecalis (strain ATCC 700802 / V583) GN=galU PE=3 SV=1 - [Q834C2_ENTFA]	23	7	1	7	33.89	33.4595	5.50342	3	0	14	6	0
B4EXL9	50S ribosomal protein L13 OS=Proteus mirabilis (strain HI4320) OX=529507 GN=rplM PE=3 SV=1 - [RL13_PROMH]	23	4	1	2	35.21	15.9685	9.78857	7	1	10	5	0
F2I8I8	Foldase protein PrsA OS=Aerococcus urinae (strain ACS-120-V-Col10a) GN=prsA PE=3 SV=1 - [F2I8I8_AERUA]	23	5	1	5	20	38.0843	5.32568	17	6	0	0	0
F2I5R4	Septation ring formation regulator EzrA OS=Aerococcus urinae (strain ACS-120-V-Col10a) GN=ezrA PE=3 SV=1 - [F2I5R4_AERUA]	23	8	1	8	21.29	66.9074	4.81787	16	7	0	0	0
F2I7T1	50S ribosomal protein L6 OS=Aerococcus urinae (strain ACS-120-V-Col10a) GN=rplF PE=3 SV=1 - [F2I7T1_AERUA]	23	4	1	4	33.52	19.7163	8.98291	16	7	0	0	0
F2I706	Methionine aminopeptidase OS=Aerococcus urinae (strain ACS-120-V-Col10a) GN=map PE=3 SV=1 - [F2I706_AERUA]	23	6	1	6	35.42	29.7966	4.85596	14	9	0	0	0
F2I748	Serine protease do-like HtrA OS=Aerococcus urinae (strain ACS-120-V-Col10a) GN=htrA PE=4 SV=1 - [F2I748_AERUA]	23	3	1	3	12.41	45.5349	5.03369	15	8	0	0	0
F2I7Q5	ATP-dependent zinc metalloprotease FtsH OS=Aerococcus urinae (strain ACS-120-V-Col10a) GN=hflB PE=3 SV=1 - [F2I7Q5_AERUA]	23	6	1	6	10.89	79.0448	5.12256	16	7	0	0	0
F2I707	Transcriptional regulator, GntR family OS=Aerococcus urinae (strain ACS-120-V-Col10a) GN=HMPREF9243_1654 PE=4 SV=1 - [F2I707_AERUA]	23	4	1	4	25.11	27.3838	5.79541	15	8	0	0	0
K9EWA4	Cysteine--tRNA ligase OS=Actinobaculum massiliense ACS-171-V-Col2 OX=883066 GN=cysS PE=3 SV=1 - [K9EWA4_9ACTO]	23	5	1	5	17.68	52.8733	5.35107	11	1	0	0	11
P59625	Carbamate kinase 2 OS=Enterococcus faecalis (strain ATCC 700802 / V583) GN=arcC2 PE=3 SV=1 - [ARCC2_ENTFA]	23	6	1	6	26.92	33.5512	4.89404	0	0	22	1	0
P27543	Mannitol-1-phosphate 5-dehydrogenase OS=Enterococcus faecalis (strain ATCC 700802 / V583) GN=mtlD PE=3 SV=2 - [MTLD_ENTFA]	23	4	1	4	13.54	43.0722	4.97021	0	0	17	6	0
Q835M4	Pyruvate dehydrogenase complex E1 component, alpha subunit OS=Enterococcus faecalis (strain ATCC 700802 / V583) GN=pdhA PE=4 SV=1 - [Q835M4_ENTFA]	23	8	1	8	34.23	41.3582	5.37646	0	0	23	0	0
Q839W6	Uncharacterized protein OS=Enterococcus faecalis (strain ATCC 700802 / V583) GN=EF_0034 PE=4 SV=1 - [Q839W6_ENTFA]	23	4	1	4	30.77	19.8532	5.89697	0	0	9	14	0
Q1REB2	DNA protection during starvation protein OS=Escherichia coli (strain UTI89 / UPEC) GN=dps PE=3 SV=3 - [DPS_ECOUT]	22	7	1	7	49.1	18.6837	6.11279	10	1	0	11	0
Q1REE7	Molybdenum cofactor biosynthesis protein B OS=Escherichia coli (strain UTI89 / UPEC) GN=moaB PE=3 SV=1 - [Q1REE7_ECOUT]	22	7	1	7	50	18.6535	6.1001	8	7	0	7	0
Q1R3Q2	Maltose-binding periplasmic protein OS=Escherichia coli (strain UTI89 / UPEC) GN=malE PE=4 SV=1 - [Q1R3Q2_ECOUT]	22	8	1	8	29.29	43.2734	6.12549	6	4	1	11	0
Q833S0	ABC transporter, ATP-binding protein OS=Enterococcus faecalis (strain ATCC 700802 / V583) GN=EF_1868 PE=4 SV=1 - [Q833S0_ENTFA]	22	5	1	4	28.9	24.059	9.29053	1	0	17	1	3
B4ETK9	50S ribosomal protein L20 OS=Proteus mirabilis (strain HI4320) OX=529507 GN=rplT PE=3 SV=1 - [RL20_PROMH]	22	3	2	3	22.88	13.4486	11.561	9	5	4	4	0
B4ETP3	Aspartate--tRNA ligase OS=Proteus mirabilis (strain HI4320) OX=529507 GN=aspS PE=3 SV=1 - [SYD_PROMH]	22	6	1	4	11.11	66.5566	5.40186	10	0	9	3	0
B4F269	Protein HflC OS=Proteus mirabilis (strain HI4320) OX=529507 GN=hflC PE=3 SV=1 - [B4F269_PROMH]	22	6	1	6	20.06	37.7137	9.0415	7	0	6	9	0
B4EX72	Putative iron utilization protein OS=Proteus mirabilis (strain HI4320) OX=529507 GN=PMI1437 PE=4 SV=1 - [B4EX72_PROMH]	22	6	1	6	29.37	32.1684	5.40186	5	3	12	2	0
B4EZX1	Putative iron ABC transporter, ATP-binding protein OS=Proteus mirabilis (strain HI4320) OX=529507 GN=PMI2960 PE=4 SV=1 - [B4EZX1_PROMH]	22	5	1	5	25.5	28.3836	5.2749	14	2	6	0	0
B4F1E2	2-deoxy-D-gluconate 3-dehydrogenase OS=Proteus mirabilis (strain HI4320) OX=529507 GN=kduD PE=4 SV=1 - [B4F1E2_PROMH]	22	4	1	4	25.1	26.942	5.73193	16	0	6	0	0
F2I5V0	Homoserine dehydrogenase OS=Aerococcus urinae (strain ACS-120-V-Col10a) GN=HMPREF9243_1437 PE=3 SV=1 - [F2I5V0_AERUA]	22	3	1	3	9.86	46.2566	4.83057	12	10	0	0	0
F2I594	Serine hydroxymethyltransferase OS=Aerococcus urinae (strain ACS-120-V-Col10a) GN=glyA PE=3 SV=1 - [F2I594_AERUA]	22	7	1	6	22.47	44.2637	7.10791	14	8	0	0	0
F2I7I4	Lipoate--protein ligase OS=Aerococcus urinae (strain ACS-120-V-Col10a) GN=HMPREF9243_1775 PE=4 SV=1 - [F2I7I4_AERUA]	22	4	1	4	13.95	38.4292	4.93213	11	11	0	0	0
F2I7L8	50S ribosomal protein L31 type B OS=Aerococcus urinae (strain ACS-120-V-Col10a) GN=rpmE PE=3 SV=1 - [F2I7L8_AERUA]	22	3	1	3	59.09	10.0929	6.78564	16	6	0	0	0
F2I6T9	PTS system, glucitol/sorbitol-specific, IIA component OS=Aerococcus urinae (strain ACS-120-V-Col10a) GN=HMPREF9243_0310 PE=4 SV=1 - [F2I6T9_AERUA]	22	2	1	2	17.8	12.9754	4.37354	8	14	0	0	0
F2I5J4	50S ribosomal protein L9 OS=Aerococcus urinae (strain ACS-120-V-Col10a) GN=rplI PE=3 SV=1 - [F2I5J4_AERUA]	22	2	1	1	14	16.6561	9.31982	8	14	0	0	0
F2I5L9	Phosphoglucosamine mutase OS=Aerococcus urinae (strain ACS-120-V-Col10a) GN=glmM PE=3 SV=1 - [F2I5L9_AERUA]	22	3	1	3	9.45	49.3019	4.88135	14	8	0	0	0
F2I5B7	Phosphoserine aminotransferase OS=Aerococcus urinae (strain ACS-120-V-Col10a) GN=serC PE=3 SV=1 - [F2I5B7_AERUA]	22	3	1	3	12.4	40.3535	5.5542	9	13	0	0	0
F2I478	Uncharacterized protein OS=Aerococcus urinae (strain ACS-120-V-Col10a) GN=HMPREF9243_0815 PE=4 SV=1 - [F2I478_AERUA]	22	4	1	4	26.74	18.8342	9.05615	15	7	0	0	0
F2I8T2	Peptidase propeptide and YPEB domain protein OS=Aerococcus urinae (strain ACS-120-V-Col10a) GN=HMPREF9243_2034 PE=4 SV=1 - [F2I8T2_AERUA]	22	2	1	2	9.82	24.9797	4.24658	7	15	0	0	0
K9EWW5	Single-stranded DNA-binding protein OS=Actinobaculum massiliense ACS-171-V-Col2 OX=883066 GN=HMPREF9233_00802 PE=3 SV=1 - [K9EWW5_9ACTO]	22	5	1	5	35.71	20.5307	4.98291	1	0	9	0	12
K9EFH0	Methionyl-tRNA formyltransferase OS=Actinobaculum massiliense ACS-171-V-Col2 OX=883066 GN=fmt PE=3 SV=1 - [K9EFH0_9ACTO]	22	6	1	5	33.14	35.5375	4.98291	2	0	0	0	20
K9EDY5	Glutamine-dependent NAD(+) synthetase OS=Actinobaculum massiliense ACS-171-V-Col2 OX=883066 GN=HMPREF9233_01322 PE=3 SV=1 - [K9EDY5_9ACTO]	22	6	1	6	13.83	80.0571	4.90674	1	0	1	0	20
K9F0T3	Uncharacterized protein OS=Actinobaculum massiliense ACS-171-V-Col2 OX=883066 GN=HMPREF9233_00871 PE=4 SV=1 - [K9F0T3_9ACTO]	22	3	1	3	17.05	28.1431	9.68604	10	0	2	0	10
K9ECW6	Peptide-methionine (R)-S-oxide reductase OS=Actinobaculum massiliense ACS-171-V-Col2 OX=883066 GN=HMPREF9233_00870 PE=4 SV=1 - [K9ECW6_9ACTO]	22	4	1	4	46.67	14.968	4.80518	4	1	2	1	14
K9EI79	ATP synthase subunit delta OS=Actinobaculum massiliense ACS-171-V-Col2 OX=883066 GN=atpH PE=3 SV=1 - [K9EI79_9ACTO]	22	5	1	5	22.18	31.6617	6.96143	9	3	0	0	10
K9F0T9	Uncharacterized protein OS=Actinobaculum massiliense ACS-171-V-Col2 OX=883066 GN=HMPREF9233_00876 PE=4 SV=1 - [K9F0T9_9ACTO]	22	3	1	3	18.11	26.5084	4.37354	3	0	9	0	10
O34154	Glycerol kinase OS=Enterococcus faecalis (strain ATCC 700802 / V583) GN=glpK PE=1 SV=3 - [GLPK_ENTFA]	22	8	1	8	23.35	55.4087	4.88135	0	0	22	0	0
Q839G1	50S ribosomal protein L2 OS=Enterococcus faecalis (strain ATCC 700802 / V583) GN=rplB PE=3 SV=1 - [RL2_ENTFA]	22	6	1	6	27.17	30.2152	10.5796	0	0	16	6	0
Q839Y9	Single-stranded DNA-binding protein OS=Enterococcus faecalis (strain ATCC 700802 / V583) GN=ssb PE=3 SV=1 - [SSB_ENTFA]	22	5	1	3	21.28	20.5917	5.0083	0	0	22	0	0
Q830C0	HD domain protein OS=Enterococcus faecalis (strain ATCC 700802 / V583) GN=EF_2870 PE=4 SV=1 - [Q830C0_ENTFA]	22	6	1	6	39.29	22.3815	5.22412	0	0	20	2	0
Q836G2	Cell cycle protein GpsB OS=Enterococcus faecalis (strain ATCC 700802 / V583) GN=gpsB PE=3 SV=1 - [Q836G2_ENTFA]	22	4	1	4	36.76	15.4048	5.05908	0	0	17	5	0
B4F0A6	Galactokinase OS=Proteus mirabilis (strain HI4320) OX=529507 GN=galK PE=3 SV=1 - [GAL1_PROMH]	22	6	1	6	20.26	42.5627	6.53662	0	0	19	3	0
B4EZ80	Putative insulinase (Peptidase family M16) OS=Proteus mirabilis (strain HI4320) OX=529507 GN=PMI2840 PE=4 SV=1 - [B4EZ80_PROMH]	22	8	1	8	19.88	56.655	5.32568	0	0	21	1	0
B4EXB1	Oligopeptide ABC transporter, oligopeptide-binding protein OS=Proteus mirabilis (strain HI4320) OX=529507 GN=oppA2 PE=4 SV=1 - [B4EXB1_PROMH]	22	7	1	7	21.25	62.0806	7.18115	0	0	21	1	0
Q1R2K0	Type 1 fimbriae major subunit FimA OS=Escherichia coli (strain UTI89 / UPEC) GN=fimA PE=4 SV=1 - [Q1R2K0_ECOUT]	22	1	1	1	13.59	18.5415	5.87158	0	0	0	22	0
Q1REF8	Pectinesterase OS=Escherichia coli (strain UTI89 / UPEC) GN=ybhC PE=4 SV=1 - [Q1REF8_ECOUT]	22	4	1	4	12.41	45.9798	6.26514	0	0	0	22	0
K9EBX4	Uncharacterized protein OS=Actinobaculum massiliense ACS-171-V-Col2 OX=883066 GN=HMPREF9233_01223 PE=4 SV=1 - [K9EBX4_9ACTO]	22	5	1	5	7.78	92.9237	5.45264	0	0	0	0	22
Q1R604	50S ribosomal protein L4 OS=Escherichia coli (strain UTI89 / UPEC) GN=rplD PE=3 SV=1 - [RL4_ECOUT]	21	3	1	2	18.91	22.0729	9.72998	8	6	0	7	0
Q1R6A7	Uncharacterized protein OS=Escherichia coli (strain UTI89 / UPEC) GN=yhcB PE=4 SV=1 - [Q1R6A7_ECOUT]	21	3	1	3	31.06	14.9515	5.88428	7	0	0	14	0
Q1R989	Bifunctional beta-ketoacyl-ACP synthase I/malonyl-ACP decarboxylase OS=Escherichia coli (strain UTI89 / UPEC) GN=fabB PE=3 SV=1 - [Q1R989_ECOUT]	21	5	1	4	17.49	42.5861	5.5415	2	1	0	18	0
Q1RCK0	DNA-binding protein OS=Escherichia coli (strain UTI89 / UPEC) GN=hns PE=3 SV=1 - [Q1RCK0_ECOUT]	21	5	1	4	44.53	15.53	5.46533	12	9	0	0	0
Q1R9B6	Phosphate acetyltransferase OS=Escherichia coli (strain UTI89 / UPEC) GN=pta PE=3 SV=1 - [Q1R9B6_ECOUT]	21	10	1	5	19.89	77.1649	5.41455	9	0	7	5	0
B4F059	Protein GrpE OS=Proteus mirabilis (strain HI4320) OX=529507 GN=grpE PE=3 SV=1 - [GRPE_PROMH]	21	2	1	2	12.32	23.1666	4.86865	12	3	5	1	0
B4EU19	6,7-dimethyl-8-ribityllumazine synthase OS=Proteus mirabilis (strain HI4320) OX=529507 GN=ribH PE=3 SV=1 - [RISB_PROMH]	21	2	1	2	22.44	16.3045	5.05908	12	0	4	5	0
B4F018	Glutamate dehydrogenase OS=Proteus mirabilis (strain HI4320) OX=529507 GN=gdhA PE=3 SV=1 - [B4F018_PROMH]	21	4	1	4	12.11	48.3684	7.03467	21	0	0	0	0
B4EYW5	Peptidyl-prolyl cis-trans isomerase OS=Proteus mirabilis (strain HI4320) OX=529507 GN=fkpA PE=3 SV=1 - [B4EYW5_PROMH]	21	3	1	3	14.86	26.932	6.30322	2	7	8	4	0
B4F0H2	Universal stress protein OS=Proteus mirabilis (strain HI4320) OX=529507 GN=PMI1954 PE=4 SV=1 - [B4F0H2_PROMH]	21	3	1	3	24.14	16.2206	5.32568	8	0	6	7	0
B4F0B6	Tryptophan--tRNA ligase OS=Proteus mirabilis (strain HI4320) OX=529507 GN=trpS PE=3 SV=1 - [B4F0B6_PROMH]	21	4	1	4	18.13	38.0594	6.26514	16	0	4	1	0
F2I8V4	Probable transcriptional regulatory protein HMPREF9243_0701 OS=Aerococcus urinae (strain ACS-120-V-Col10a) GN=HMPREF9243_0701 PE=3 SV=1 - [F2I8V4_AERUA]	21	3	1	3	13.58	27.0091	4.60205	5	16	0	0	0
F2I5C7	Beta sliding clamp OS=Aerococcus urinae (strain ACS-120-V-Col10a) GN=dnaN PE=3 SV=1 - [F2I5C7_AERUA]	21	8	1	7	32.9	42.7372	4.90674	15	6	0	0	0
F2I4T2	Universal stress family protein OS=Aerococcus urinae (strain ACS-120-V-Col10a) GN=HMPREF9243_1058 PE=3 SV=1 - [F2I4T2_AERUA]	21	4	1	4	32.64	16.2181	4.89404	8	13	0	0	0
K9F2I6	Dihydropteroate synthase OS=Actinobaculum massiliense ACS-171-V-Col2 OX=883066 GN=HMPREF9233_00472 PE=3 SV=1 - [K9F2I6_9ACTO]	21	8	1	8	43.92	34.9786	5.17334	1	0	0	0	20
K9EFH6	Guanylate kinase OS=Actinobaculum massiliense ACS-171-V-Col2 OX=883066 GN=gmk PE=3 SV=1 - [K9EFH6_9ACTO]	21	6	1	6	38.83	20.5237	4.91943	3	2	8	0	8
K9EH34	Uncharacterized protein OS=Actinobaculum massiliense ACS-171-V-Col2 OX=883066 GN=HMPREF9233_00036 PE=4 SV=1 - [K9EH34_9ACTO]	21	7	1	7	27.58	42.7329	7.13721	6	0	0	0	15
K9EBG0	Glucose-6-phosphate 1-dehydrogenase OS=Actinobaculum massiliense ACS-171-V-Col2 OX=883066 GN=zwf PE=3 SV=1 - [K9EBG0_9ACTO]	21	6	1	6	16.33	55.7387	5.92236	6	0	1	0	14
K9EGS8	Phosphate-binding protein PstS OS=Actinobaculum massiliense ACS-171-V-Col2 OX=883066 GN=HMPREF9233_00882 PE=3 SV=1 - [K9EGS8_9ACTO]	21	7	1	7	35.11	39.0811	4.51318	3	0	0	0	18
K9EVI5	Uncharacterized protein OS=Actinobaculum massiliense ACS-171-V-Col2 OX=883066 GN=HMPREF9233_01120 PE=4 SV=1 - [K9EVI5_9ACTO]	21	7	1	7	30.48	37.405	5.14795	4	0	0	0	17
K9F0E8	Uncharacterized protein OS=Actinobaculum massiliense ACS-171-V-Col2 OX=883066 GN=HMPREF9233_01389 PE=4 SV=1 - [K9F0E8_9ACTO]	21	2	1	2	34.25	7.86523	5.10986	5	5	6	3	2
H7C714	Glucose-1-phosphate thymidylyltransferase OS=Enterococcus faecalis (strain ATCC 700802 / V583) GN=rfbA PE=3 SV=1 - [H7C714_ENTFA]	21	5	1	4	18.06	32.0273	4.85596	0	0	18	3	0
Q839W5	Uncharacterized protein OS=Enterococcus faecalis (strain ATCC 700802 / V583) GN=EF_0035 PE=4 SV=1 - [Q839W5_ENTFA]	21	2	1	2	20.65	17.4988	5.46533	0	0	21	0	0
Q836B0	Malate dehydrogenase, decarboxylating OS=Enterococcus faecalis (strain ATCC 700802 / V583) GN=EF_1206 PE=3 SV=1 - [Q836B0_ENTFA]	21	5	1	5	26.74	41.5281	5.49072	0	0	21	0	0
B4EZJ5	Phosphate-binding protein PstS OS=Proteus mirabilis (strain HI4320) OX=529507 GN=pstS PE=3 SV=1 - [B4EZJ5_PROMH]	21	6	1	6	22.25	36.9531	8.74854	0	0	18	3	0
K9EB83	Gamma-glutamyl phosphate reductase OS=Actinobaculum massiliense ACS-171-V-Col2 OX=883066 GN=proA PE=3 SV=1 - [K9EB83_9ACTO]	21	8	1	8	26.3	44.8708	5.64307	0	0	2	0	19
Q1R7B7	D-3-phosphoglycerate dehydrogenase OS=Escherichia coli (strain UTI89 / UPEC) GN=serA PE=3 SV=1 - [Q1R7B7_ECOUT]	21	3	1	3	10.24	44.1481	6.354	0	0	0	21	0
K9EFP4	Uncharacterized protein OS=Actinobaculum massiliense ACS-171-V-Col2 OX=883066 GN=HMPREF9233_00818 PE=4 SV=1 - [K9EFP4_9ACTO]	21	5	1	5	23.05	27.3465	4.95752	0	0	0	0	21
Q1R260	Phosphopentomutase OS=Escherichia coli (strain UTI89 / UPEC) GN=deoB PE=3 SV=1 - [DEOB_ECOUT]	20	6	1	4	16.46	44.365	5.35107	5	3	0	12	0
Q1R601	30S ribosomal protein S10 OS=Escherichia coli (strain UTI89 / UPEC) GN=rpsJ PE=3 SV=1 - [RS10_ECOUT]	20	3	1	1	33.98	11.7284	9.68604	6	3	0	11	0
Q1R443	Glutamine synthetase OS=Escherichia coli (strain UTI89 / UPEC) GN=glnA PE=3 SV=1 - [Q1R443_ECOUT]	20	4	1	4	12.58	51.8707	5.46533	8	2	1	9	0
Q836X6	50S ribosomal protein L21 OS=Enterococcus faecalis (strain ATCC 700802 / V583) GN=rplU PE=3 SV=1 - [RL21_ENTFA]	20	3	1	3	42.16	11.139	9.67139	1	0	13	6	0
Q838J4	OsmC/Ohr family protein OS=Enterococcus faecalis (strain ATCC 700802 / V583) GN=EF_0453 PE=4 SV=1 - [Q838J4_ENTFA]	20	2	1	2	18.05	14.3713	5.5415	3	2	6	9	0
B4F183	Phosphoenolpyruvate carboxylase OS=Proteus mirabilis (strain HI4320) OX=529507 GN=ppc PE=3 SV=1 - [CAPP_PROMH]	20	7	1	6	9.68	98.6159	5.65576	10	0	9	1	0
B4F298	Fructose-1,6-bisphosphatase class 1 OS=Proteus mirabilis (strain HI4320) OX=529507 GN=fbp PE=3 SV=1 - [F16PA_PROMH]	20	4	2	4	17.61	36.7936	5.96045	9	0	10	1	0
B4F1F5	Putative tagatose-1,6-bisphosphate aldolase OS=Proteus mirabilis (strain HI4320) OX=529507 GN=gatY PE=3 SV=1 - [B4F1F5_PROMH]	20	7	1	7	34.86	31.3008	5.93506	20	0	0	0	0
B4EV74	Ferric uptake regulation protein OS=Proteus mirabilis (strain HI4320) OX=529507 GN=fur PE=3 SV=1 - [B4EV74_PROMH]	20	3	2	3	27.03	16.7244	6.37939	9	3	4	4	0
B4F1M7	Peptidyl-prolyl cis-trans isomerase OS=Proteus mirabilis (strain HI4320) OX=529507 GN=ppiB PE=3 SV=1 - [B4F1M7_PROMH]	20	3	1	3	25	18.1528	5.32568	3	0	5	12	0
B4ESS6	Cell division coordinator CpoB OS=Proteus mirabilis (strain HI4320) OX=529507 GN=cpoB PE=3 SV=1 - [B4ESS6_PROMH]	20	5	1	5	25.29	28.0622	8.63135	1	0	16	3	0
B4F0Q7	Putative exported protein OS=Proteus mirabilis (strain HI4320) OX=529507 GN=PMI3093 PE=4 SV=1 - [B4F0Q7_PROMH]	20	2	1	2	17.91	14.5657	6.78564	5	3	11	1	0
B4F1V5	Transcription termination factor Rho OS=Proteus mirabilis (strain HI4320) OX=529507 GN=rho PE=3 SV=1 - [B4F1V5_PROMH]	20	6	2	6	18.14	46.9326	7.25439	11	1	5	3	0
B4ESZ6	Probable alcohol dehydrogenase OS=Proteus mirabilis (strain HI4320) OX=529507 GN=PMI0657 PE=4 SV=1 - [B4ESZ6_PROMH]	20	4	1	4	13.58	40.0781	5.31299	4	0	9	7	0
F2I7T4	50S ribosomal protein L30 OS=Aerococcus urinae (strain ACS-120-V-Col10a) GN=rpmD PE=3 SV=1 - [F2I7T4_AERUA]	20	2	1	2	31.67	6.67075	9.81787	9	11	0	0	0
F2I696	Uncharacterized protein OS=Aerococcus urinae (strain ACS-120-V-Col10a) GN=HMPREF9243_1530 PE=4 SV=1 - [F2I696_AERUA]	20	2	1	2	15.73	20.7418	4.80518	9	11	0	0	0
F2I5W7	Putative ATP synthase, subunit E OS=Aerococcus urinae (strain ACS-120-V-Col10a) GN=HMPREF9243_1454 PE=4 SV=1 - [F2I5W7_AERUA]	20	1	1	1	7.25	22.2233	5.13525	15	5	0	0	0
K9F3F0	Superoxide dismutase OS=Actinobaculum massiliense ACS-171-V-Col2 OX=883066 GN=HMPREF9233_00063 PE=3 SV=1 - [K9F3F0_9ACTO]	20	6	1	6	49.04	23.4516	5.26221	1	0	1	0	18
K9ED44	GTPase Der OS=Actinobaculum massiliense ACS-171-V-Col2 OX=883066 GN=der PE=3 SV=1 - [K9ED44_9ACTO]	20	7	1	7	20.42	52.9865	5.5415	10	0	0	0	10
K9EJF7	Peptidylprolyl isomerase OS=Actinobaculum massiliense ACS-171-V-Col2 OX=883066 GN=HMPREF9233_00064 PE=4 SV=1 - [K9EJF7_9ACTO]	20	5	1	5	21.71	33.837	4.57666	2	0	0	0	18
K9EYB8	Uncharacterized protein OS=Actinobaculum massiliense ACS-171-V-Col2 OX=883066 GN=HMPREF9233_00045 PE=4 SV=1 - [K9EYB8_9ACTO]	20	3	1	3	36.08	10.6889	4.14502	5	2	2	1	10
K9EFR4	Phosphohistidine phosphatase SixA OS=Actinobaculum massiliense ACS-171-V-Col2 OX=883066 GN=HMPREF9233_01673 PE=4 SV=1 - [K9EFR4_9ACTO]	20	4	1	4	36.97	17.8743	6.1001	2	0	2	0	16
K9EDF8	FeS assembly protein SufB OS=Actinobaculum massiliense ACS-171-V-Col2 OX=883066 GN=HMPREF9233_01685 PE=4 SV=1 - [K9EDF8_9ACTO]	20	3	1	3	9.32	54.2167	5.03369	2	10	0	0	8
K9EF37	Uncharacterized protein OS=Actinobaculum massiliense ACS-171-V-Col2 OX=883066 GN=HMPREF9233_01418 PE=4 SV=1 - [K9EF37_9ACTO]	20	4	1	4	13.45	54.4702	4.7417	18	2	0	0	0
Q834L7	Ethanolamine ammonia-lyase large subunit OS=Enterococcus faecalis (strain ATCC 700802 / V583) GN=eutB PE=4 SV=1 - [Q834L7_ENTFA]	20	5	1	5	14.76	49.8317	4.98291	0	18	2	0	0
Q831A5	ATP synthase subunit beta OS=Enterococcus faecalis (strain ATCC 700802 / V583) GN=atpD PE=3 SV=1 - [ATPB_ENTFA]	20	5	1	3	12.39	50.7751	4.81787	0	5	15	0	0
Q835Z1	Uncharacterized protein OS=Enterococcus faecalis (strain ATCC 700802 / V583) GN=EF_1227 PE=4 SV=1 - [Q835Z1_ENTFA]	20	6	1	6	16.99	46.4764	5.12256	0	1	15	4	0
K9EIG7	Lysine--tRNA ligase OS=Actinobaculum massiliense ACS-171-V-Col2 OX=883066 GN=lysS PE=3 SV=1 - [K9EIG7_9ACTO]	20	6	1	6	19.23	57.9224	4.76709	0	2	4	0	14
Q1R9K0	Outer membrane protein 1b (Ibc) OS=Escherichia coli (strain UTI89 / UPEC) GN=ompC PE=3 SV=1 - [Q1R9K0_ECOUT]	20	6	1	5	20.39	39.9712	4.81787	0	0	8	12	0
Q831A3	ATP synthase subunit alpha OS=Enterococcus faecalis (strain ATCC 700802 / V583) GN=atpA PE=3 SV=1 - [ATPA_ENTFA]	20	6	1	5	14.48	56.1481	5.04639	0	0	14	6	0
Q839E5	50S ribosomal protein L15 OS=Enterococcus faecalis (strain ATCC 700802 / V583) GN=rplO PE=3 SV=1 - [RL15_ENTFA]	20	3	1	3	25.34	15.5645	10.3452	0	0	12	8	0
Q833P5	50S ribosomal protein L19 OS=Enterococcus faecalis (strain ATCC 700802 / V583) GN=rplS PE=3 SV=1 - [RL19_ENTFA]	20	4	1	4	37.39	13.2094	11.0776	0	0	15	5	0
Q82ZW6	Valine--tRNA ligase OS=Enterococcus faecalis (strain ATCC 700802 / V583) GN=valS PE=3 SV=1 - [SYV_ENTFA]	20	9	1	9	13.64	101.526	4.95752	0	0	20	0	0
Q834Y2	V-type ATPase, subunit E OS=Enterococcus faecalis (strain ATCC 700802 / V583) GN=EF_1495 PE=4 SV=1 - [Q834Y2_ENTFA]	20	4	1	4	26.94	22.4436	4.77979	0	0	19	1	0
B4EWE3	Xaa-Pro dipeptidase OS=Proteus mirabilis (strain HI4320) OX=529507 GN=pepQ PE=3 SV=1 - [PEPQ_PROMH]	20	6	1	6	18.92	50.7833	6.29053	0	0	12	8	0
K9ED93	Uncharacterized protein OS=Actinobaculum massiliense ACS-171-V-Col2 OX=883066 GN=HMPREF9233_00985 PE=4 SV=1 - [K9ED93_9ACTO]	20	5	1	5	10.38	79.8071	4.85596	0	0	0	0	20
K9EGD5	Uncharacterized protein OS=Actinobaculum massiliense ACS-171-V-Col2 OX=883066 GN=HMPREF9233_01360 PE=3 SV=1 - [K9EGD5_9ACTO]	20	9	1	8	18.26	70.0333	5.09717	0	0	0	0	20
Q1R358	30S ribosomal protein S18 OS=Escherichia coli (strain UTI89 / UPEC) GN=rpsR PE=3 SV=1 - [RS18_ECOUT]	19	2	1	2	29.33	8.98085	10.5942	6	2	7	4	0
Q1RDS8	Outer membrane protein F OS=Escherichia coli (strain UTI89 / UPEC) GN=ompF PE=3 SV=1 - [Q1RDS8_ECOUT]	19	6	1	6	20.44	39.3301	4.97021	5	0	11	3	0
Q1RFD0	Nucleoside channel receptor of phage T6 and colicin K OS=Escherichia coli (strain UTI89 / UPEC) GN=tsx PE=4 SV=1 - [Q1RFD0_ECOUT]	19	2	1	2	7.74	35.4578	6.27783	4	0	0	15	0
Q1REA2	Putative formate acetyltransferase 3 OS=Escherichia coli (strain UTI89 / UPEC) GN=ybiW PE=4 SV=1 - [Q1REA2_ECOUT]	19	4	1	4	8.02	90.1267	6.07471	10	8	0	1	0
B4F0E3	ATP synthase subunit b OS=Proteus mirabilis (strain HI4320) OX=529507 GN=atpF PE=3 SV=1 - [ATPF_PROMH]	19	5	1	3	39.74	17.1841	5.30029	7	0	6	6	0
B4EZU8	Cysteine desulfurase IscS OS=Proteus mirabilis (strain HI4320) OX=529507 GN=iscS PE=3 SV=1 - [ISCS_PROMH]	19	7	1	6	23.51	44.8761	6.17627	5	0	6	8	0
B4F1J4	50S ribosomal protein L14 OS=Proteus mirabilis (strain HI4320) OX=529507 GN=rplN PE=3 SV=1 - [RL14_PROMH]	19	3	1	2	30.08	13.6495	10.272	8	0	4	7	0
B4ET08	Penicillin-binding protein (D-alanyl-D-alanine carboxypeptidase) OS=Proteus mirabilis (strain HI4320) OX=529507 GN=dacC PE=3 SV=1 - [B4ET08_PROMH]	19	7	1	6	21.25	43.7507	6.72705	12	0	4	3	0
B4EX13	sn-glycerol-3-phosphate import ATP-binding protein UgpC OS=Proteus mirabilis (strain HI4320) OX=529507 GN=ugpC PE=3 SV=1 - [B4EX13_PROMH]	19	1	1	1	3.85	40.6602	6.85889	1	15	2	0	1
B4EUT6	Na(+)-translocating NADH-quinone reductase subunit C OS=Proteus mirabilis (strain HI4320) OX=529507 GN=nqrC PE=3 SV=1 - [B4EUT6_PROMH]	19	4	1	4	18.77	28.4198	6.13818	8	0	6	5	0
B4EZI4	Glutamine synthetase OS=Proteus mirabilis (strain HI4320) OX=529507 GN=glnA PE=3 SV=1 - [B4EZI4_PROMH]	19	4	1	4	14.71	52.2918	5.2749	4	0	4	11	0
F2I668	Valine--tRNA ligase OS=Aerococcus urinae (strain ACS-120-V-Col10a) GN=valS PE=3 SV=1 - [F2I668_AERUA]	19	6	1	6	8.85	101.714	4.89404	8	11	0	0	0
F2I651	Methionine import ATP-binding protein MetN OS=Aerococcus urinae (strain ACS-120-V-Col10a) GN=metN PE=3 SV=1 - [F2I651_AERUA]	19	5	1	4	20.23	38.133	5.98584	12	7	0	0	0
F2I4L1	Endolytic murein transglycosylase OS=Aerococcus urinae (strain ACS-120-V-Col10a) GN=mltG PE=3 SV=1 - [F2I4L1_AERUA]	19	3	1	3	10.85	38.1478	4.50049	14	5	0	0	0
F2I554	50S ribosomal protein L27 OS=Aerococcus urinae (strain ACS-120-V-Col10a) GN=rpmA PE=3 SV=1 - [F2I554_AERUA]	19	3	1	3	44.09	10.0572	10.1548	11	8	0	0	0
F2I6K5	Polyribonucleotide nucleotidyltransferase OS=Aerococcus urinae (strain ACS-120-V-Col10a) GN=pnp PE=3 SV=1 - [F2I6K5_AERUA]	19	7	1	7	12.89	78.0088	4.94482	16	3	0	0	0
F2I4R8	Glycine--tRNA ligase beta subunit OS=Aerococcus urinae (strain ACS-120-V-Col10a) GN=glyS PE=3 SV=1 - [F2I4R8_AERUA]	19	4	1	4	8.46	79.8504	4.79248	12	7	0	0	0
F2I497	Elongation factor P OS=Aerococcus urinae (strain ACS-120-V-Col10a) GN=efp PE=3 SV=1 - [F2I497_AERUA]	19	2	1	2	14.05	20.4073	4.94482	8	11	0	0	0
K9EYF2	Uncharacterized protein OS=Actinobaculum massiliense ACS-171-V-Col2 OX=883066 GN=HMPREF9233_00100 PE=4 SV=1 - [K9EYF2_9ACTO]	19	9	1	9	27.91	46.7573	5.74463	9	0	0	0	10
K9ECJ9	UDP-N-acetylglucosamine diphosphorylase/glucosamine-1-phosphate N-acetyltransferase OS=Actinobaculum massiliense ACS-171-V-Col2 OX=883066 GN=HMPREF9233_01122 PE=4 SV=1 - [K9ECJ9_9ACTO]	19	6	1	5	30.42	32.3494	4.84326	5	0	2	0	12
K9EHJ4	Molybdenum cofactor synthesis domain-containing protein OS=Actinobaculum massiliense ACS-171-V-Col2 OX=883066 GN=HMPREF9233_01087 PE=4 SV=1 - [K9EHJ4_9ACTO]	19	10	1	10	40.89	42.3308	5.31299	1	0	4	0	14
K9EWN8	Ribonucleoside-diphosphate reductase subunit beta OS=Actinobaculum massiliense ACS-171-V-Col2 OX=883066 GN=HMPREF9233_00722 PE=3 SV=1 - [K9EWN8_9ACTO]	19	3	1	2	10.46	37.0681	4.44971	5	0	3	0	11
K9EFB8	UvrABC system protein A OS=Actinobaculum massiliense ACS-171-V-Col2 OX=883066 GN=uvrA PE=3 SV=1 - [K9EFB8_9ACTO]	19	10	1	10	13.52	104.721	6.59521	2	0	0	0	17
K9EHH8	Uncharacterized protein OS=Actinobaculum massiliense ACS-171-V-Col2 OX=883066 GN=HMPREF9233_01072 PE=4 SV=1 - [K9EHH8_9ACTO]	19	3	1	3	15.35	25.4212	5.12256	6	0	0	0	13
K9F2G2	Uncharacterized protein OS=Actinobaculum massiliense ACS-171-V-Col2 OX=883066 GN=HMPREF9233_00447 PE=4 SV=1 - [K9F2G2_9ACTO]	19	5	1	5	25.58	36.0461	4.58936	10	9	0	0	0
Q1R607	50S ribosomal protein L2 OS=Escherichia coli (strain UTI89 / UPEC) GN=rplB PE=3 SV=1 - [RL2_ECOUT]	19	5	1	2	21.61	29.842	10.9312	0	9	0	10	0
Q836T1	Putative pyruvate, phosphate dikinase regulatory protein 1 OS=Enterococcus faecalis (strain ATCC 700802 / V583) GN=EF_1026 PE=3 SV=1 - [PDRP1_ENTFA]	19	7	1	7	37.04	30.1468	4.84326	0	0	13	6	0
Q82ZY3	Transcription elongation factor GreA OS=Enterococcus faecalis (strain ATCC 700802 / V583) GN=greA PE=3 SV=1 - [Q82ZY3_ENTFA]	19	2	1	1	15.72	17.6319	4.43701	0	0	7	12	0
Q839A6	Glycosyl hydrolase, family 1 OS=Enterococcus faecalis (strain ATCC 700802 / V583) GN=EF_0271 PE=3 SV=1 - [Q839A6_ENTFA]	19	6	1	6	15.55	54.4154	4.98291	0	0	19	0	0
Q835M1	Dihydrolipoyl dehydrogenase OS=Enterococcus faecalis (strain ATCC 700802 / V583) GN=lpdA PE=3 SV=1 - [Q835M1_ENTFA]	19	6	1	5	16.88	49.1134	5.05908	0	0	18	1	0
Q836J2	Amino acid ABC transporter, amino acid-binding protein OS=Enterococcus faecalis (strain ATCC 700802 / V583) GN=EF_1119 PE=4 SV=1 - [Q836J2_ENTFA]	19	5	1	5	25.45	30.4276	5.37646	0	0	19	0	0
B4EXX7	Putative non-ribosomal peptide synthase (Putative siderophore synthase) OS=Proteus mirabilis (strain HI4320) OX=529507 GN=PMI2599 PE=4 SV=1 - [B4EXX7_PROMH]	19	6	1	6	3.74	233.088	7.43018	0	0	15	4	0
K9EEP7	Uncharacterized protein OS=Actinobaculum massiliense ACS-171-V-Col2 OX=883066 GN=HMPREF9233_00919 PE=4 SV=1 - [K9EEP7_9ACTO]	19	2	1	2	11.96	35.0872	4.729	0	0	1	0	18
Q1R8B1	Protein GrpE OS=Escherichia coli (strain UTI89 / UPEC) GN=grpE PE=3 SV=1 - [GRPE_ECOUT]	18	3	1	3	22.84	21.8422	4.71631	4	2	0	12	0
Q1R383	Adenylosuccinate synthetase OS=Escherichia coli (strain UTI89 / UPEC) GN=purA PE=3 SV=1 - [PURA_ECOUT]	18	6	1	3	15.97	47.3153	5.49072	8	1	0	9	0
Q1RFB4	UPF0234 protein YajQ OS=Escherichia coli (strain UTI89 / UPEC) GN=yajQ PE=3 SV=3 - [YAJQ_ECOUT]	18	2	1	2	17.18	18.3326	6.23975	11	7	0	0	0
Q1RF73	Acriflavine resistance protein A OS=Escherichia coli (strain UTI89 / UPEC) GN=acrA PE=3 SV=1 - [Q1RF73_ECOUT]	18	4	1	4	13.94	43.4948	8.42627	13	0	0	5	0
Q1R8S3	Detox protein OS=Escherichia coli (strain UTI89 / UPEC) GN=eutM PE=4 SV=1 - [Q1R8S3_ECOUT]	18	1	1	1	10.81	11.3719	5.19873	2	8	3	5	0
Q839F8	30S ribosomal protein S3 OS=Enterococcus faecalis (strain ATCC 700802 / V583) GN=rpsC PE=3 SV=1 - [RS3_ENTFA]	18	4	1	4	24.31	24.3551	9.80322	1	0	9	8	0
B4EY26	Carnitinyl-CoA dehydratase OS=Proteus mirabilis (strain HI4320) OX=529507 GN=caiD PE=3 SV=1 - [CAID_PROMH]	18	7	1	7	35.63	28.1664	5.2749	1	1	16	0	0
B4EV93	Serine--tRNA ligase OS=Proteus mirabilis (strain HI4320) OX=529507 GN=serS PE=3 SV=1 - [SYS_PROMH]	18	7	1	7	21.21	48.7098	5.85889	4	2	11	1	0
B4F254	Acetyl-coenzyme A carboxylase carboxyl transferase subunit alpha OS=Proteus mirabilis (strain HI4320) OX=529507 GN=accA PE=3 SV=1 - [B4F254_PROMH]	18	3	1	3	12.85	35.5263	5.79541	8	0	7	3	0
B4EWM2	Lactoylglutathione lyase OS=Proteus mirabilis (strain HI4320) OX=529507 GN=gloA PE=3 SV=1 - [B4EWM2_PROMH]	18	3	1	3	22.96	14.6092	4.81787	2	1	9	6	0
B4EUT4	Na(+)-translocating NADH-quinone reductase subunit A OS=Proteus mirabilis (strain HI4320) OX=529507 GN=nqrA PE=3 SV=1 - [B4EUT4_PROMH]	18	7	1	7	20.85	49.2092	6.25244	8	0	9	1	0
B4EZH6	Uncharacterized protein OS=Proteus mirabilis (strain HI4320) OX=529507 GN=PMI1809 PE=4 SV=1 - [B4EZH6_PROMH]	18	1	1	1	13.27	10.5279	4.53857	4	0	10	4	0
B4F0A7	Galactose-1-phosphate uridylyltransferase OS=Proteus mirabilis (strain HI4320) OX=529507 GN=galT PE=3 SV=1 - [B4F0A7_PROMH]	18	4	1	4	14.77	40.9582	6.63916	1	0	14	3	0
B4EV21	Putative metal resistance protein OS=Proteus mirabilis (strain HI4320) OX=529507 GN=PMI0440 PE=4 SV=1 - [B4EV21_PROMH]	18	4	1	4	27.16	26.7523	7.89893	15	1	2	0	0
B4ET44	Metallo-beta-lactamase superfamily protein OS=Proteus mirabilis (strain HI4320) OX=529507 GN=PMI0732 PE=4 SV=1 - [B4ET44_PROMH]	18	5	1	5	31.48	24.4491	5.89697	3	3	12	0	0
B4EY48	ABC transporter ATP-binding component OS=Proteus mirabilis (strain HI4320) OX=529507 GN=PMI3712 PE=4 SV=1 - [B4EY48_PROMH]	18	7	1	6	14.23	62.4201	5.52881	5	0	6	7	0
F2I8M1	Polyphosphate kinase OS=Aerococcus urinae (strain ACS-120-V-Col10a) GN=ppk1 PE=3 SV=1 - [F2I8M1_AERUA]	18	5	1	5	9.58	84.4817	5.96045	10	8	0	0	0
F2I667	Glutamine--fructose-6-phosphate aminotransferase [isomerizing] OS=Aerococcus urinae (strain ACS-120-V-Col10a) GN=glmS PE=3 SV=1 - [F2I667_AERUA]	18	4	1	4	11.96	65.908	5.0083	6	12	0	0	0
F2I783	NH(3)-dependent NAD(+) synthetase OS=Aerococcus urinae (strain ACS-120-V-Col10a) GN=nadE PE=3 SV=1 - [F2I783_AERUA]	18	3	1	3	14.49	30.9116	4.98291	15	3	0	0	0
F2I8I0	4-phosphoerythronate dehydrogenase OS=Aerococcus urinae (strain ACS-120-V-Col10a) GN=pdxB PE=3 SV=1 - [F2I8I0_AERUA]	18	5	1	5	27.59	34.6888	4.86865	12	6	0	0	0
F2I8Y4	Flavin reductase OS=Aerococcus urinae (strain ACS-120-V-Col10a) GN=HMPREF9243_0736 PE=4 SV=1 - [F2I8Y4_AERUA]	18	4	1	4	36.84	20.9845	5.10986	6	12	0	0	0
F2I5M5	LysM domain protein OS=Aerococcus urinae (strain ACS-120-V-Col10a) GN=HMPREF9243_0067 PE=4 SV=1 - [F2I5M5_AERUA]	18	2	1	2	15.52	24.7021	4.75439	17	1	0	0	0
F2I4P2	RelA/SpoT family protein OS=Aerococcus urinae (strain ACS-120-V-Col10a) GN=HMPREF9243_1006 PE=3 SV=1 - [F2I4P2_AERUA]	18	6	1	6	10.16	85.5144	5.87158	14	4	0	0	0
F2I5E1	Lipoprotein OS=Aerococcus urinae (strain ACS-120-V-Col10a) GN=HMPREF9243_1304 PE=3 SV=1 - [F2I5E1_AERUA]	18	2	1	2	8.79	30.7163	4.77979	8	10	0	0	0
F2I6J1	Ribulose-phosphate 3-epimerase OS=Aerococcus urinae (strain ACS-120-V-Col10a) GN=rpe PE=3 SV=1 - [F2I6J1_AERUA]	18	3	1	3	15.81	23.6545	4.94482	6	12	0	0	0
K9ECV2	D-alanine--D-alanine ligase OS=Actinobaculum massiliense ACS-171-V-Col2 OX=883066 GN=ddl PE=3 SV=1 - [K9ECV2_9ACTO]	18	7	1	7	27.6	39.7218	4.77979	3	0	0	0	15
K9ECI1	Uncharacterized protein OS=Actinobaculum massiliense ACS-171-V-Col2 OX=883066 GN=HMPREF9233_01097 PE=4 SV=1 - [K9ECI1_9ACTO]	18	3	1	3	10.41	52.9131	9.17334	4	0	0	0	14
K9EJK3	UDP-N-acetylglucosamine--N-acetylmuramyl-(pentapeptide) pyrophosphoryl-undecaprenol N-acetylglucosamine transferase OS=Actinobaculum massiliense ACS-171-V-Col2 OX=883066 GN=murG PE=3 SV=1 - [K9EJK3_9ACTO]	18	7	1	7	40.54	39.0276	6.97607	6	0	1	0	11
K9EED5	ATP synthase subunit a OS=Actinobaculum massiliense ACS-171-V-Col2 OX=883066 GN=atpB PE=3 SV=1 - [K9EED5_9ACTO]	18	2	1	2	8.76	29.8171	8.63135	5	3	0	3	7
K9EWL5	Uncharacterized protein OS=Actinobaculum massiliense ACS-171-V-Col2 OX=883066 GN=HMPREF9233_00707 PE=3 SV=1 - [K9EWL5_9ACTO]	18	6	1	6	22.1	38.4187	4.64014	12	4	2	0	0
K9F3U0	Pyrroline-5-carboxylate reductase OS=Actinobaculum massiliense ACS-171-V-Col2 OX=883066 GN=proC PE=3 SV=1 - [K9F3U0_9ACTO]	18	7	1	7	39.1	27.1081	5.03369	4	2	0	0	12
K9F0M2	Uncharacterized protein OS=Actinobaculum massiliense ACS-171-V-Col2 OX=883066 GN=HMPREF9233_01193 PE=4 SV=1 - [K9F0M2_9ACTO]	18	5	1	5	11.36	64.4396	4.86865	1	0	0	0	17
K9EG89	IMP dehydrogenase OS=Actinobaculum massiliense ACS-171-V-Col2 OX=883066 GN=HMPREF9233_01320 PE=4 SV=1 - [K9EG89_9ACTO]	18	7	1	7	30.19	39.2742	6.15088	2	0	0	0	16
K9EED8	Uncharacterized protein OS=Actinobaculum massiliense ACS-171-V-Col2 OX=883066 GN=HMPREF9233_01181 PE=4 SV=1 - [K9EED8_9ACTO]	18	7	1	7	20.78	60.9058	5.8208	2	0	0	0	16
K9F3B1	Uncharacterized protein OS=Actinobaculum massiliense ACS-171-V-Col2 OX=883066 GN=HMPREF9233_00008 PE=4 SV=1 - [K9F3B1_9ACTO]	18	7	1	7	18.79	63.0998	5.07178	5	0	0	0	13
K9EVJ3	Uncharacterized protein OS=Actinobaculum massiliense ACS-171-V-Col2 OX=883066 GN=HMPREF9233_01130 PE=4 SV=1 - [K9EVJ3_9ACTO]	18	8	1	8	51.95	27.4458	4.81787	1	0	0	0	17
K9EWS3	Uncharacterized protein OS=Actinobaculum massiliense ACS-171-V-Col2 OX=883066 GN=HMPREF9233_00742 PE=4 SV=1 - [K9EWS3_9ACTO]	18	7	1	7	16	68.3757	5.021	1	0	0	0	17
K9F3S8	UPF0109 protein HMPREF9233_00228 OS=Actinobaculum massiliense ACS-171-V-Col2 OX=883066 GN=HMPREF9233_00228 PE=3 SV=1 - [K9F3S8_9ACTO]	18	3	1	2	48.1	8.48151	5.45264	14	0	4	0	0
K9EF35	RNA methyltransferase, TrmH family, group 3 OS=Actinobaculum massiliense ACS-171-V-Col2 OX=883066 GN=HMPREF9233_01029 PE=3 SV=1 - [K9EF35_9ACTO]	18	6	1	6	27.46	35.5377	9.27588	1	0	0	0	17
Q1R5M5	Ferrous iron transport protein B OS=Escherichia coli (strain UTI89 / UPEC) GN=feoB PE=3 SV=1 - [Q1R5M5_ECOUT]	18	4	1	2	5.66	84.823	6.18896	0	9	0	9	0
Q831C8	Uncharacterized protein OS=Enterococcus faecalis (strain ATCC 700802 / V583) GN=EF_2583 PE=4 SV=1 - [Q831C8_ENTFA]	18	4	1	4	22.17	23.664	5.03369	0	1	14	3	0
Q831S5	Phosphoglucomutase/phosphomannomutase family protein OS=Enterococcus faecalis (strain ATCC 700802 / V583) GN=EF_2425 PE=3 SV=1 - [Q831S5_ENTFA]	18	5	1	5	11.85	63.713	4.94482	0	1	12	5	0
Q834Y3	V-type ATPase, subunit K OS=Enterococcus faecalis (strain ATCC 700802 / V583) GN=EF_1494 PE=3 SV=1 - [Q834Y3_ENTFA]	18	2	1	2	19.11	16.3867	7.23975	0	2	4	12	0
Q1RAF6	Yersiniabactin siderophore biosynthetic protein OS=Escherichia coli (strain UTI89 / UPEC) GN=ybtE PE=4 SV=1 - [Q1RAF6_ECOUT]	18	5	1	5	13.14	57.3375	5.49072	0	0	2	16	0
Q839F6	50S ribosomal protein L29 OS=Enterococcus faecalis (strain ATCC 700802 / V583) GN=rpmC PE=3 SV=1 - [RL29_ENTFA]	18	2	1	1	37.1	7.32502	9.59814	0	0	11	7	0
Q839E0	30S ribosomal protein S11 OS=Enterococcus faecalis (strain ATCC 700802 / V583) GN=rpsK PE=3 SV=1 - [RS11_ENTFA]	18	2	1	2	21.71	13.7043	11.0483	0	0	6	12	0
Q82ZC6	PTS system, IID component OS=Enterococcus faecalis (strain ATCC 700802 / V583) GN=EF_3138 PE=4 SV=1 - [Q82ZC6_ENTFA]	18	4	1	4	18.28	32.1639	8.20654	0	0	14	4	0
Q837G5	Oxidoreductase, aldo/keto reductase 2 family OS=Enterococcus faecalis (strain ATCC 700802 / V583) GN=EF_0877 PE=4 SV=1 - [Q837G5_ENTFA]	18	6	1	6	24.09	33.8631	5.21143	0	0	18	0	0
Q837Z0	Cmp-binding protein, putative OS=Enterococcus faecalis (strain ATCC 700802 / V583) GN=EF_0684 PE=4 SV=1 - [Q837Z0_ENTFA]	18	5	1	5	17.52	35.9386	6.46826	0	0	12	6	0
K9EVU3	Uncharacterized protein OS=Actinobaculum massiliense ACS-171-V-Col2 OX=883066 GN=HMPREF9233_00868 PE=4 SV=1 - [K9EVU3_9ACTO]	18	5	1	5	8.25	96.6261	6.15088	0	0	3	0	15
K9EDY7	DNA gyrase subunit B OS=Actinobaculum massiliense ACS-171-V-Col2 OX=883066 GN=gyrB PE=3 SV=1 - [K9EDY7_9ACTO]	18	5	1	5	8.68	77.1727	5.31299	0	0	0	0	18
K9EH92	Sugar porter (SP) family MFS transporter OS=Actinobaculum massiliense ACS-171-V-Col2 OX=883066 GN=HMPREF9233_01012 PE=3 SV=1 - [K9EH92_9ACTO]	18	4	1	4	13.92	50.2602	8.77783	0	0	0	0	18
K9EEM7	Uncharacterized protein OS=Actinobaculum massiliense ACS-171-V-Col2 OX=883066 GN=HMPREF9233_00899 PE=4 SV=1 - [K9EEM7_9ACTO]	18	4	1	4	25.3	27.6988	4.77979	0	0	0	0	18
K9F1G4	Uncharacterized protein OS=Actinobaculum massiliense ACS-171-V-Col2 OX=883066 GN=HMPREF9233_01066 PE=4 SV=1 - [K9F1G4_9ACTO]	18	7	1	7	14.44	68.8213	4.95752	0	0	0	0	18
Q1R4K1	ATP synthase gamma chain OS=Escherichia coli (strain UTI89 / UPEC) GN=atpG PE=3 SV=1 - [ATPG_ECOUT]	17	5	1	2	18.82	31.5573	8.76318	9	2	0	6	0
Q1RCN5	Ribosome-binding ATPase YchF OS=Escherichia coli (strain UTI89 / UPEC) GN=ychF PE=3 SV=1 - [Q1RCN5_ECOUT]	17	5	2	4	17.91	39.6283	4.95752	3	2	6	6	0
Q1R7A9	Uncharacterized protein OS=Escherichia coli (strain UTI89 / UPEC) GN=yggB PE=4 SV=1 - [Q1R7A9_ECOUT]	17	3	1	3	12.94	30.8496	6.90283	3	0	0	14	0
Q82Z99	Ribonuclease Y OS=Enterococcus faecalis (strain ATCC 700802 / V583) GN=rny PE=3 SV=1 - [RNY_ENTFA]	17	8	1	8	18.92	58.0136	5.45264	2	2	9	4	0
B4F0E4	ATP synthase subunit delta OS=Proteus mirabilis (strain HI4320) OX=529507 GN=atpH PE=3 SV=1 - [ATPD_PROMH]	17	4	1	4	31.64	19.5063	5.021	1	0	6	10	0
B4EYV3	50S ribosomal protein L11 OS=Proteus mirabilis (strain HI4320) OX=529507 GN=rplK PE=3 SV=1 - [RL11_PROMH]	17	3	1	3	26.06	14.8519	9.51025	5	2	9	1	0
B4F262	Outer membrane protein assembly factor BamA OS=Proteus mirabilis (strain HI4320) OX=529507 GN=yaeT PE=3 SV=1 - [B4F262_PROMH]	17	10	1	10	14.84	88.9547	5.43994	10	0	4	2	1
B4EXJ7	Probable sigma(54) modulation protein OS=Proteus mirabilis (strain HI4320) OX=529507 GN=PMI3647 PE=4 SV=1 - [B4EXJ7_PROMH]	17	2	1	2	27.37	10.6307	7.57666	7	0	7	3	0
B4F159	ATP-dependent 6-phosphofructokinase OS=Proteus mirabilis (strain HI4320) OX=529507 GN=pfkA PE=3 SV=1 - [B4F159_PROMH]	17	3	1	2	12.62	35.5041	6.02393	9	0	6	2	0
B4F0U8	DNA gyrase subunit B OS=Proteus mirabilis (strain HI4320) OX=529507 GN=gyrB PE=3 SV=1 - [B4F0U8_PROMH]	17	6	1	6	10.32	90.4318	5.65576	6	0	9	2	0
B4ETR2	D-lactate dehydrogenase OS=Proteus mirabilis (strain HI4320) OX=529507 GN=ldhA PE=3 SV=1 - [B4ETR2_PROMH]	17	6	1	6	20.18	36.7206	6.41748	4	1	11	1	0
B4EZ37	Catalase OS=Proteus mirabilis (strain HI4320) OX=529507 GN=katA PE=3 SV=1 - [B4EZ37_PROMH]	17	4	1	3	11.36	55.5794	6.58057	11	0	5	1	0
B4EVV6	Site-determining protein OS=Proteus mirabilis (strain HI4320) OX=529507 GN=minD PE=3 SV=1 - [B4EVV6_PROMH]	17	6	1	5	27.41	29.6383	4.98291	1	0	12	4	0
B4F268	Protein HflK OS=Proteus mirabilis (strain HI4320) OX=529507 GN=hflK PE=3 SV=1 - [B4F268_PROMH]	17	4	1	4	12.74	45.8771	8.104	6	1	9	1	0
F2I673	50S ribosomal protein L33 OS=Aerococcus urinae (strain ACS-120-V-Col10a) GN=rpmG PE=3 SV=1 - [F2I673_AERUA]	17	1	1	1	21.57	6.28454	10.1694	5	12	0	0	0
F2I854	Conserved TM helix OS=Aerococcus urinae (strain ACS-120-V-Col10a) GN=HMPREF9243_0575 PE=4 SV=1 - [F2I854_AERUA]	17	4	1	4	11.06	45.6143	6.16357	8	9	0	0	0
F2I8C4	Oxidoreductase, aldo/keto reductase family protein OS=Aerococcus urinae (strain ACS-120-V-Col10a) GN=HMPREF9243_1946 PE=4 SV=1 - [F2I8C4_AERUA]	17	3	1	3	20.43	31.397	4.91943	13	4	0	0	0
F2I462	LemA family protein OS=Aerococcus urinae (strain ACS-120-V-Col10a) GN=HMPREF9243_0796 PE=4 SV=1 - [F2I462_AERUA]	17	2	1	2	13.59	21.2667	5.37646	9	8	0	0	0
F2I498	Uncharacterized protein OS=Aerococcus urinae (strain ACS-120-V-Col10a) GN=HMPREF9243_0836 PE=4 SV=1 - [F2I498_AERUA]	17	1	1	1	9.87	16.9106	4.88135	11	6	0	0	0
F2I8D7	Aspartyl/glutamyl-tRNA(Asn/Gln) amidotransferase subunit C OS=Aerococcus urinae (strain ACS-120-V-Col10a) GN=gatC PE=3 SV=1 - [F2I8D7_AERUA]	17	2	1	2	43.43	11.1534	4.44971	10	7	0	0	0
K9EFC4	Queuine tRNA-ribosyltransferase OS=Actinobaculum massiliense ACS-171-V-Col2 OX=883066 GN=tgt PE=3 SV=1 - [K9EFC4_9ACTO]	17	6	1	6	23.2	47.9089	6.55127	3	1	0	0	13
K9EJC5	Histidine--tRNA ligase OS=Actinobaculum massiliense ACS-171-V-Col2 OX=883066 GN=HMPREF9233_00009 PE=3 SV=1 - [K9EJC5_9ACTO]	17	7	1	6	21.29	49.5436	5.19873	4	1	1	0	11
K9ECM5	Uncharacterized protein OS=Actinobaculum massiliense ACS-171-V-Col2 OX=883066 GN=HMPREF9233_01157 PE=4 SV=1 - [K9ECM5_9ACTO]	17	3	1	3	24.07	22.7206	4.05615	9	0	0	0	8
K9EC99	Alanine dehydrogenase OS=Actinobaculum massiliense ACS-171-V-Col2 OX=883066 GN=HMPREF9233_01323 PE=3 SV=1 - [K9EC99_9ACTO]	17	5	1	5	21.12	38.7967	5.14795	3	0	1	0	13
K9EE87	Thymidylate synthase OS=Actinobaculum massiliense ACS-171-V-Col2 OX=883066 GN=thyA PE=3 SV=1 - [K9EE87_9ACTO]	17	4	1	4	22.22	30.6262	5.43994	3	0	2	0	12
K9EFW2	Aspartyl/glutamyl-tRNA(Asn/Gln) amidotransferase subunit C OS=Actinobaculum massiliense ACS-171-V-Col2 OX=883066 GN=gatC PE=3 SV=1 - [K9EFW2_9ACTO]	17	6	1	6	93.88	10.5213	4.2085	7	0	0	0	10
K9EVH5	Uncharacterized protein OS=Actinobaculum massiliense ACS-171-V-Col2 OX=883066 GN=HMPREF9233_01110 PE=4 SV=1 - [K9EVH5_9ACTO]	17	6	1	6	16.41	69.5791	5.68115	1	0	0	0	16
K9EHA2	Uncharacterized protein OS=Actinobaculum massiliense ACS-171-V-Col2 OX=883066 GN=HMPREF9233_00121 PE=4 SV=1 - [K9EHA2_9ACTO]	17	1	1	1	11.81	15.3743	4.23389	6	0	0	2	9
K9F0R1	Uncharacterized protein OS=Actinobaculum massiliense ACS-171-V-Col2 OX=883066 GN=HMPREF9233_00851 PE=4 SV=1 - [K9F0R1_9ACTO]	17	5	1	5	33.73	17.5599	5.19873	3	0	0	0	14
K9EHJ5	FolC protein OS=Actinobaculum massiliense ACS-171-V-Col2 OX=883066 GN=HMPREF9233_00236 PE=4 SV=1 - [K9EHJ5_9ACTO]	17	8	1	8	22.99	58.3881	4.52588	1	0	0	0	16
K9ECL6	Uncharacterized protein OS=Actinobaculum massiliense ACS-171-V-Col2 OX=883066 GN=HMPREF9233_01147 PE=4 SV=1 - [K9ECL6_9ACTO]	17	3	1	3	11.27	37.0049	5.57959	2	0	1	0	14
Q1RF96	Lon protease OS=Escherichia coli (strain UTI89 / UPEC) GN=lon PE=2 SV=1 - [Q1RF96_ECOUT]	17	5	1	1	8.14	89.0927	6.30322	0	6	0	11	0
Q833I5	UPF0340 protein EF_1967 OS=Enterococcus faecalis (strain ATCC 700802 / V583) GN=EF_1967 PE=3 SV=1 - [Y1967_ENTFA]	17	4	1	4	39.15	20.4887	6.41748	0	5	10	2	0
Q839S6	Gls24 protein OS=Enterococcus faecalis (strain ATCC 700802 / V583) GN=EF_0080 PE=4 SV=1 - [Q839S6_ENTFA]	17	5	2	4	32.26	20.5404	4.79248	0	3	5	9	0
Q831B2	FMN-dependent NADH-azoreductase OS=Enterococcus faecalis (strain ATCC 700802 / V583) GN=azoR PE=1 SV=1 - [AZOR_ENTFA]	17	3	1	3	18.75	23.2068	4.99561	0	0	8	9	0
Q82ZJ0	Peptide deformylase OS=Enterococcus faecalis (strain ATCC 700802 / V583) GN=def PE=1 SV=1 - [DEF_ENTFA]	17	5	1	5	41.71	20.8987	5.17334	0	0	16	1	0
Q839B2	Hypoxanthine-guanine phosphoribosyltransferase OS=Enterococcus faecalis (strain ATCC 700802 / V583) GN=hpt PE=3 SV=1 - [HPRT_ENTFA]	17	5	1	5	32.6	20.2596	4.79248	0	0	16	1	0
Q831V2	Ribosome-recycling factor OS=Enterococcus faecalis (strain ATCC 700802 / V583) GN=frr PE=3 SV=1 - [RRF_ENTFA]	17	5	1	5	37.84	20.791	5.2876	0	0	15	2	0
Q82ZC3	D-isomer specific 2-hydroxyacid dehydrogenase family protein OS=Enterococcus faecalis (strain ATCC 700802 / V583) GN=EF_3141 PE=3 SV=1 - [Q82ZC3_ENTFA]	17	4	1	4	16.82	36.4847	5.5542	0	0	11	6	0
Q82ZX3	Ribonuclease J OS=Enterococcus faecalis (strain ATCC 700802 / V583) GN=rnj PE=3 SV=1 - [Q82ZX3_ENTFA]	17	5	1	5	13.37	61.1726	6.13818	0	0	10	7	0
Q82ZE9	Acyl carrier protein OS=Enterococcus faecalis (strain ATCC 700802 / V583) GN=acpP PE=1 SV=1 - [Q82ZE9_ENTFA]	17	2	1	2	44.3	8.82927	4.03076	0	0	14	3	0
Q82ZN0	Uncharacterized protein OS=Enterococcus faecalis (strain ATCC 700802 / V583) GN=EF_3021 PE=1 SV=1 - [Q82ZN0_ENTFA]	17	4	1	4	36.69	19.2468	5.23682	0	0	17	0	0
Q82YV7	Sodium ion-translocating decarboxylase, biotin carboxyl carrier protein OS=Enterococcus faecalis (strain ATCC 700802 / V583) GN=EF_3325 PE=4 SV=1 - [Q82YV7_ENTFA]	17	1	1	1	18.8	13.6461	4.4751	0	0	17	0	0
Q82Z03	Uncharacterized protein OS=Enterococcus faecalis (strain ATCC 700802 / V583) GN=EF_3276 PE=4 SV=1 - [Q82Z03_ENTFA]	17	5	1	5	21.7	39.4919	4.76709	0	0	15	2	0
Q836W9	Uncharacterized protein OS=Enterococcus faecalis (strain ATCC 700802 / V583) GN=EF_0976 PE=4 SV=1 - [Q836W9_ENTFA]	17	2	1	2	19.58	15.804	4.37354	0	0	15	2	0
B4EX56	Phosphoenolpyruvate synthase OS=Proteus mirabilis (strain HI4320) OX=529507 GN=ppsA PE=3 SV=1 - [B4EX56_PROMH]	17	7	1	7	10.87	87.0613	4.88135	0	0	15	2	0
K9EG11	Aminotransferase OS=Actinobaculum massiliense ACS-171-V-Col2 OX=883066 GN=HMPREF9233_01255 PE=3 SV=1 - [K9EG11_9ACTO]	17	6	1	6	24.07	42.8252	6.01123	0	0	1	0	16
K9EFN0	Ribosomal RNA small subunit methyltransferase H OS=Actinobaculum massiliense ACS-171-V-Col2 OX=883066 GN=rsmH PE=3 SV=1 - [K9EFN0_9ACTO]	17	3	1	3	15.85	35.5497	6.21436	0	0	0	0	17
K9EEJ5	Lactate permease (LctP) family transporter OS=Actinobaculum massiliense ACS-171-V-Col2 OX=883066 GN=HMPREF9233_00446 PE=4 SV=1 - [K9EEJ5_9ACTO]	17	6	1	6	14.39	56.7617	8.66064	0	0	0	0	17
K9F1Q6	Uncharacterized protein OS=Actinobaculum massiliense ACS-171-V-Col2 OX=883066 GN=HMPREF9233_00735 PE=4 SV=1 - [K9F1Q6_9ACTO]	17	3	1	3	13.19	46.1741	4.31006	0	0	0	0	17
Q1R4J6	ATP synthase subunit b OS=Escherichia coli (strain UTI89 / UPEC) GN=atpF PE=3 SV=1 - [ATPF_ECOUT]	16	5	1	3	39.1	17.2533	6.23975	5	0	3	8	0
Q1R6H0	Translation initiation factor IF-2 OS=Escherichia coli (strain UTI89 / UPEC) GN=infB PE=3 SV=1 - [IF2_ECOUT]	16	6	1	5	7.98	97.2193	6.07471	7	0	0	9	0
Q1REP9	Glucosamine-6-phosphate deaminase OS=Escherichia coli (strain UTI89 / UPEC) GN=nagB PE=3 SV=1 - [NAGB_ECOUT]	16	3	1	3	13.91	29.7551	6.90283	4	1	0	11	0
Q1R602	50S ribosomal protein L3 OS=Escherichia coli (strain UTI89 / UPEC) GN=rplC PE=3 SV=1 - [RL3_ECOUT]	16	5	1	4	34.45	22.2298	9.90576	8	0	0	8	0
Q1R620	50S ribosomal protein L5 OS=Escherichia coli (strain UTI89 / UPEC) GN=rplE PE=3 SV=1 - [RL5_ECOUT]	16	4	1	1	27.37	20.2887	9.48096	4	6	0	6	0
Q1RG97	Protein translocase subunit SecA OS=Escherichia coli (strain UTI89 / UPEC) GN=secA PE=3 SV=1 - [SECA_ECOUT]	16	9	1	7	13.1	101.927	5.60498	10	0	0	6	0
Q1RBJ5	NAD(P) transhydrogenase subunit alpha OS=Escherichia coli (strain UTI89 / UPEC) GN=pntA PE=3 SV=1 - [Q1RBJ5_ECOUT]	16	4	1	2	10.8	56.4124	5.84619	3	0	0	13	0
Q1R403	ATP-dependent 6-phosphofructokinase OS=Escherichia coli (strain UTI89 / UPEC) GN=pfkA PE=3 SV=1 - [Q1R403_ECOUT]	16	2	1	1	7.67	38.6926	6.45557	14	0	0	2	0
B4F1L0	50S ribosomal protein L17 OS=Proteus mirabilis (strain HI4320) OX=529507 GN=rplQ PE=3 SV=1 - [RL17_PROMH]	16	3	1	3	25.78	14.3867	11.0337	4	0	7	5	0
B4EZU9	HTH-type transcriptional regulator IscR OS=Proteus mirabilis (strain HI4320) OX=529507 GN=iscR PE=4 SV=1 - [B4EZU9_PROMH]	16	3	2	3	28.05	18.1342	5.92236	6	2	8	0	0
B4EU57	Peptidylprolyl isomerase OS=Proteus mirabilis (strain HI4320) OX=529507 GN=ppiD PE=4 SV=1 - [B4EU57_PROMH]	16	7	1	7	14.08	68.651	4.83057	5	0	8	3	0
B4F2L8	Anaerobic ribonucleoside-triphosphate reductase OS=Proteus mirabilis (strain HI4320) OX=529507 GN=nrdD PE=4 SV=1 - [B4F2L8_PROMH]	16	5	1	5	8.99	79.9393	7.03467	9	0	7	0	0
B4EWY7	Fumarate reductase flavoprotein subunit OS=Proteus mirabilis (strain HI4320) OX=529507 GN=frdA PE=3 SV=1 - [B4EWY7_PROMH]	16	5	2	5	12.04	66.1001	6.65381	4	0	10	2	0
B4EWX1	Putative esterase OS=Proteus mirabilis (strain HI4320) OX=529507 GN=PMI2503 PE=4 SV=1 - [B4EWX1_PROMH]	16	8	1	8	22.96	58.4065	5.64307	1	0	12	3	0
F2I5V1	UDP-N-acetylmuramyl-tripeptide synthetase OS=Aerococcus urinae (strain ACS-120-V-Col10a) GN=murE PE=3 SV=1 - [F2I5V1_AERUA]	16	5	1	5	14.09	56.8438	5.90967	9	7	0	0	0
F2I557	Dihydroorotase OS=Aerococcus urinae (strain ACS-120-V-Col10a) GN=pyrC PE=3 SV=1 - [F2I557_AERUA]	16	3	1	3	9.49	46.5894	5.46533	14	2	0	0	0
F2I739	Glutamine synthetase OS=Aerococcus urinae (strain ACS-120-V-Col10a) GN=glnA PE=3 SV=1 - [F2I739_AERUA]	16	3	1	3	10.79	50.1381	5.04639	11	5	0	0	0
F2I5R8	Hydrolase, NUDIX family OS=Aerococcus urinae (strain ACS-120-V-Col10a) GN=HMPREF9243_1402 PE=4 SV=1 - [F2I5R8_AERUA]	16	2	1	2	15.85	20.7889	4.98291	9	7	0	0	0
F2I8F8	FMN-binding domain protein OS=Aerococcus urinae (strain ACS-120-V-Col10a) GN=HMPREF9243_0617 PE=4 SV=1 - [F2I8F8_AERUA]	16	3	1	3	12.67	49.269	4.90674	10	6	0	0	0
K9EFJ2	Uncharacterized protein OS=Actinobaculum massiliense ACS-171-V-Col2 OX=883066 GN=HMPREF9233_00107 PE=4 SV=1 - [K9EFJ2_9ACTO]	16	3	1	3	10.8	48.1033	5.05908	2	0	1	0	13
K9EBY9	Ribokinase OS=Actinobaculum massiliense ACS-171-V-Col2 OX=883066 GN=rbsK PE=3 SV=1 - [K9EBY9_9ACTO]	16	5	1	5	24.57	35.701	4.71631	2	1	1	0	12
K9EZH5	Ribosomal RNA small subunit methyltransferase B OS=Actinobaculum massiliense ACS-171-V-Col2 OX=883066 GN=HMPREF9233_01592 PE=3 SV=1 - [K9EZH5_9ACTO]	16	5	1	5	15.11	51.6245	5.60498	2	0	0	0	14
K9EG04	Uncharacterized protein OS=Actinobaculum massiliense ACS-171-V-Col2 OX=883066 GN=HMPREF9233_01250 PE=4 SV=1 - [K9EG04_9ACTO]	16	4	1	4	13.26	49.9257	8.52881	5	4	3	0	4
K9EXF2	Uncharacterized protein OS=Actinobaculum massiliense ACS-171-V-Col2 OX=883066 GN=HMPREF9233_00454 PE=4 SV=1 - [K9EXF2_9ACTO]	16	5	1	5	23.08	28.4357	5.10986	3	3	0	0	10
K9ED26	Nucleotide-binding protein HMPREF9233_01540 OS=Actinobaculum massiliense ACS-171-V-Col2 OX=883066 GN=HMPREF9233_01540 PE=3 SV=1 - [K9ED26_9ACTO]	16	6	1	6	26.05	34.6101	6.66846	4	0	0	0	12
K9EGZ1	Uncharacterized protein OS=Actinobaculum massiliense ACS-171-V-Col2 OX=883066 GN=HMPREF9233_00947 PE=4 SV=1 - [K9EGZ1_9ACTO]	16	1	1	1	4.08	42.3593	5.84619	1	0	0	0	15
K9EG50	Uncharacterized protein OS=Actinobaculum massiliense ACS-171-V-Col2 OX=883066 GN=HMPREF9233_00435 PE=4 SV=1 - [K9EG50_9ACTO]	16	3	1	3	27.92	17.5938	6.78564	2	4	2	0	8
K9ECE8	Uncharacterized protein OS=Actinobaculum massiliense ACS-171-V-Col2 OX=883066 GN=HMPREF9233_01363 PE=4 SV=1 - [K9ECE8_9ACTO]	16	7	1	7	20.04	57.1718	5.16064	3	0	0	0	13
K9EWH8	Uncharacterized protein OS=Actinobaculum massiliense ACS-171-V-Col2 OX=883066 GN=HMPREF9233_01078 PE=4 SV=1 - [K9EWH8_9ACTO]	16	6	1	6	31.53	30.6947	5.47803	1	0	0	0	15
K9EXI7	Uncharacterized protein OS=Actinobaculum massiliense ACS-171-V-Col2 OX=883066 GN=HMPREF9233_00489 PE=4 SV=1 - [K9EXI7_9ACTO]	16	6	1	6	33.87	31.0918	4.67822	2	0	0	0	14
K9F347	Uncharacterized protein OS=Actinobaculum massiliense ACS-171-V-Col2 OX=883066 GN=HMPREF9233_00637 PE=4 SV=1 - [K9F347_9ACTO]	16	2	1	2	59.49	8.80741	4.51318	3	0	2	0	11
K9F1E7	Uncharacterized protein OS=Actinobaculum massiliense ACS-171-V-Col2 OX=883066 GN=HMPREF9233_01051 PE=4 SV=1 - [K9F1E7_9ACTO]	16	5	1	5	27.05	30.3233	5.89697	1	0	0	0	15
F2I5R0	6-phosphogluconate dehydrogenase, decarboxylating OS=Aerococcus urinae (strain ACS-120-V-Col10a) GN=gnd PE=3 SV=1 - [F2I5R0_AERUA]	16	4	1	2	12.11	53.6568	5.04639	0	7	4	5	0
K9EE73	Uncharacterized protein OS=Actinobaculum massiliense ACS-171-V-Col2 OX=883066 GN=HMPREF9233_01111 PE=4 SV=1 - [K9EE73_9ACTO]	16	6	1	6	24.76	33.5746	4.70361	0	2	0	0	14
Q82YQ5	Pheromone binding protein OS=Enterococcus faecalis (strain ATCC 700802 / V583) GN=prgZ PE=4 SV=1 - [Q82YQ5_ENTFA]	16	4	1	4	10.73	48.4708	5.5415	0	0	14	2	0
Q836N9	UDP-glucose 4-epimerase OS=Enterococcus faecalis (strain ATCC 700802 / V583) GN=galE-1 PE=3 SV=1 - [Q836N9_ENTFA]	16	7	1	7	24.62	36.3042	5.24951	0	0	16	0	0
Q82YN1	Aggregation substance PrgB OS=Enterococcus faecalis (strain ATCC 700802 / V583) GN=prgB PE=4 SV=1 - [Q82YN1_ENTFA]	16	9	1	8	9.12	142.272	6.29053	0	0	16	0	0
Q832N0	dTDP-4-dehydrorhamnose 3,5-epimerase OS=Enterococcus faecalis (strain ATCC 700802 / V583) GN=rfbC PE=3 SV=1 - [Q832N0_ENTFA]	16	6	1	6	52.63	21.3227	5.74463	0	0	16	0	0
P53520	Chaperone protein PmfD OS=Proteus mirabilis (strain HI4320) OX=529507 GN=pmfD PE=3 SV=1 - [PMFD_PROMH]	16	6	1	6	28.35	28.1907	9.18799	0	0	14	2	0
B4EV75	Flavodoxin OS=Proteus mirabilis (strain HI4320) OX=529507 GN=fldA PE=3 SV=1 - [B4EV75_PROMH]	16	4	1	4	33.14	19.6053	4.15771	0	0	15	1	0
B4ESU1	6-phosphogluconolactonase OS=Proteus mirabilis (strain HI4320) OX=529507 GN=pgl PE=4 SV=1 - [B4ESU1_PROMH]	16	5	1	4	21.88	36.3883	6.13818	0	0	10	6	0
K9EBI1	Uncharacterized protein OS=Actinobaculum massiliense ACS-171-V-Col2 OX=883066 GN=HMPREF9233_01571 PE=4 SV=1 - [K9EBI1_9ACTO]	16	6	1	6	16.55	60.369	4.86865	0	0	1	0	15
K9F0S3	Uncharacterized protein OS=Actinobaculum massiliense ACS-171-V-Col2 OX=883066 GN=HMPREF9233_00861 PE=3 SV=1 - [K9F0S3_9ACTO]	16	4	1	4	9.85	59.2746	7.26904	0	0	0	0	16
K9EG80	tRNA N6-adenosine threonylcarbamoyltransferase OS=Actinobaculum massiliense ACS-171-V-Col2 OX=883066 GN=tsaD PE=3 SV=1 - [K9EG80_9ACTO]	16	5	1	5	29.19	36.1645	4.89404	0	0	0	0	16
K9EBJ1	Uncharacterized protein OS=Actinobaculum massiliense ACS-171-V-Col2 OX=883066 GN=HMPREF9233_01581 PE=4 SV=1 - [K9EBJ1_9ACTO]	16	5	1	5	25.78	28.5526	6.13818	0	0	0	0	16
K9EH61	Uncharacterized protein OS=Actinobaculum massiliense ACS-171-V-Col2 OX=883066 GN=HMPREF9233_00071 PE=4 SV=1 - [K9EH61_9ACTO]	16	4	1	4	45.05	18.5559	4.50049	0	0	0	0	16
Q1RCM3	2-dehydro-3-deoxyphosphooctonate aldolase OS=Escherichia coli (strain UTI89 / UPEC) GN=kdsA PE=3 SV=1 - [KDSA_ECOUT]	15	4	1	1	20.42	30.8129	6.80029	5	5	2	3	0
Q1R6F0	50S ribosomal protein L21 OS=Escherichia coli (strain UTI89 / UPEC) GN=rplU PE=3 SV=1 - [RL21_ECOUT]	15	2	2	2	21.36	11.5572	9.84717	4	1	1	9	0
Q1RAB2	Putative outer membrane receptor for iron compound or colicin OS=Escherichia coli (strain UTI89 / UPEC) GN=UTI89_C2234 PE=3 SV=1 - [Q1RAB2_ECOUT]	15	4	1	4	7.97	79.129	5.63037	11	4	0	0	0
Q1RE65	Arginine-binding periplasmic protein 2 OS=Escherichia coli (strain UTI89 / UPEC) GN=artJ PE=3 SV=1 - [Q1RE65_ECOUT]	15	7	1	7	40.38	28.7197	8.29443	2	0	2	11	0
Q836C2	DNA-binding response regulator VicR OS=Enterococcus faecalis (strain ATCC 700802 / V583) GN=vicR PE=1 SV=1 - [Q836C2_ENTFA]	15	5	1	3	21.79	26.941	5.26221	1	0	14	0	0
Q833J8	Fructosamine deglycase OS=Enterococcus faecalis (strain ATCC 700802 / V583) GN=EF_1950 PE=4 SV=1 - [Q833J8_ENTFA]	15	4	1	4	16.47	38.0491	5.5542	3	7	5	0	0
B4F0E1	ATP synthase subunit a OS=Proteus mirabilis (strain HI4320) OX=529507 GN=atpB PE=3 SV=1 - [ATP6_PROMH]	15	2	1	2	11.68	30.5856	6.88818	9	0	6	0	0
B4F1I8	30S ribosomal protein S19 OS=Proteus mirabilis (strain HI4320) OX=529507 GN=rpsS PE=3 SV=1 - [RS19_PROMH]	15	2	1	1	27.17	10.3837	10.3306	9	0	6	0	0
B4EU40	UPF0234 protein PMI0103 OS=Proteus mirabilis (strain HI4320) OX=529507 GN=PMI0103 PE=3 SV=1 - [Y103_PROMH]	15	3	1	3	26.38	18.5416	6.06201	4	1	10	0	0
B4F2D7	UPF0325 protein PMI2289 OS=Proteus mirabilis (strain HI4320) OX=529507 GN=PMI2289 PE=3 SV=1 - [Y2289_PROMH]	15	4	1	4	33.59	15.2529	6.55127	6	1	6	2	0
B4EZ05	Uncharacterized protein OS=Proteus mirabilis (strain HI4320) OX=529507 GN=PMI1708 PE=4 SV=1 - [B4EZ05_PROMH]	15	3	1	3	18.33	21.1947	5.64307	3	0	7	5	0
B4EWL4	Glutathione S-transferase OS=Proteus mirabilis (strain HI4320) OX=529507 GN=gst PE=3 SV=1 - [B4EWL4_PROMH]	15	4	1	4	23.15	22.838	6.87354	5	0	8	2	0
B4ETL1	Phenylalanine--tRNA ligase beta subunit OS=Proteus mirabilis (strain HI4320) OX=529507 GN=pheT PE=3 SV=1 - [B4ETL1_PROMH]	15	7	1	7	11.82	87.5821	4.99561	4	0	11	0	0
B4F0B4	Ribulose-phosphate 3-epimerase OS=Proteus mirabilis (strain HI4320) OX=529507 GN=rpe PE=3 SV=1 - [B4F0B4_PROMH]	15	4	1	4	29.02	24.5976	5.32568	6	0	9	0	0
F2I4F8	Arginine--tRNA ligase OS=Aerococcus urinae (strain ACS-120-V-Col10a) GN=argS PE=3 SV=1 - [F2I4F8_AERUA]	15	7	1	6	15.99	63.5896	5.05908	8	7	0	0	0
F2I4M0	3-oxoacyl-[acyl-carrier-protein] synthase 2 OS=Aerococcus urinae (strain ACS-120-V-Col10a) GN=fabF PE=3 SV=1 - [F2I4M0_AERUA]	15	3	1	3	18.12	43.6477	5.56689	8	7	0	0	0
F2I7K8	Alpha-1,4 glucan phosphorylase OS=Aerococcus urinae (strain ACS-120-V-Col10a) GN=glgP PE=3 SV=1 - [F2I7K8_AERUA]	15	3	1	3	6.97	86.5891	5.07178	12	3	0	0	0
F2I5N6	Response regulator receiver domain protein OS=Aerococcus urinae (strain ACS-120-V-Col10a) GN=HMPREF9243_0084 PE=4 SV=1 - [F2I5N6_AERUA]	15	3	1	3	20.61	25.098	4.80518	11	4	0	0	0
F2I4S2	Adenine phosphoribosyltransferase OS=Aerococcus urinae (strain ACS-120-V-Col10a) GN=apt PE=3 SV=1 - [F2I4S2_AERUA]	15	2	1	2	16.37	18.9891	4.97021	11	4	0	0	0
F2I544	Glucose-1-phosphate adenylyltransferase, GlgD subunit OS=Aerococcus urinae (strain ACS-120-V-Col10a) GN=glgD PE=4 SV=1 - [F2I544_AERUA]	15	1	1	1	5.99	43.2288	5.40186	9	6	0	0	0
F2I733	Hydrolase, TatD family OS=Aerococcus urinae (strain ACS-120-V-Col10a) GN=HMPREF9243_1686 PE=4 SV=1 - [F2I733_AERUA]	15	4	1	4	23.02	30.2831	5.21143	12	3	0	0	0
K9EF88	Elongation factor 4 OS=Actinobaculum massiliense ACS-171-V-Col2 OX=883066 GN=lepA PE=3 SV=1 - [K9EF88_9ACTO]	15	6	1	6	15.4	67.5408	5.13525	7	0	0	0	8
K9EY68	Uncharacterized protein OS=Actinobaculum massiliense ACS-171-V-Col2 OX=883066 GN=HMPREF9233_00664 PE=4 SV=1 - [K9EY68_9ACTO]	15	6	1	6	18.67	50.0707	5.16064	4	1	0	0	10
K9EV35	50S ribosomal protein L36 OS=Actinobaculum massiliense ACS-171-V-Col2 OX=883066 GN=rpmJ PE=3 SV=1 - [K9EV35_9ACTO]	15	1	1	1	24.32	4.36132	11.3999	3	3	4	3	2
K9F3M5	Protein RecA OS=Actinobaculum massiliense ACS-171-V-Col2 OX=883066 GN=recA PE=3 SV=1 - [K9F3M5_9ACTO]	15	6	1	6	23.04	40.8923	5.92236	3	0	0	0	12
K9F0J0	Exodeoxyribonuclease 7 small subunit OS=Actinobaculum massiliense ACS-171-V-Col2 OX=883066 GN=xseB PE=3 SV=1 - [K9F0J0_9ACTO]	15	6	1	6	31.62	25.1131	4.48779	4	0	0	0	11
K9F2K6	Uncharacterized protein OS=Actinobaculum massiliense ACS-171-V-Col2 OX=883066 GN=HMPREF9233_00492 PE=4 SV=1 - [K9F2K6_9ACTO]	15	2	1	2	13.95	18.3912	5.45264	5	0	0	0	10
K9ECQ2	GTP-binding protein TypA/BipA OS=Actinobaculum massiliense ACS-171-V-Col2 OX=883066 GN=HMPREF9233_01187 PE=4 SV=1 - [K9ECQ2_9ACTO]	15	5	1	5	9.28	74.7056	5.08447	4	0	0	0	11
K9EH44	Uncharacterized protein OS=Actinobaculum massiliense ACS-171-V-Col2 OX=883066 GN=HMPREF9233_00046 PE=4 SV=1 - [K9EH44_9ACTO]	15	4	1	4	14.77	44.4573	4.85596	4	0	0	0	11
K9EHY9	Prephenate dehydratase OS=Actinobaculum massiliense ACS-171-V-Col2 OX=883066 GN=pheA PE=4 SV=1 - [K9EHY9_9ACTO]	15	3	1	3	15.94	34.2935	5.89697	2	0	0	0	13
K9F0E5	Uncharacterized protein OS=Actinobaculum massiliense ACS-171-V-Col2 OX=883066 GN=HMPREF9233_01384 PE=4 SV=1 - [K9F0E5_9ACTO]	15	3	1	3	11.91	54.5983	4.99561	2	0	0	0	13
K9F3H0	Uncharacterized protein OS=Actinobaculum massiliense ACS-171-V-Col2 OX=883066 GN=HMPREF9233_00093 PE=4 SV=1 - [K9F3H0_9ACTO]	15	4	1	4	26.82	23.7349	4.60205	2	0	0	0	13
K9EF75	Uncharacterized protein OS=Actinobaculum massiliense ACS-171-V-Col2 OX=883066 GN=HMPREF9233_01478 PE=4 SV=1 - [K9EF75_9ACTO]	15	2	1	2	9.61	31.2426	4.4751	4	0	0	0	11
Q1RAG0	Putative peptide synthetase-like protein OS=Escherichia coli (strain UTI89 / UPEC) GN=irp2 PE=4 SV=1 - [Q1RAG0_ECOUT]	15	6	1	6	5.63	229.109	6.21436	0	1	1	13	0
Q1RAF8	Thiazolinyl-S-HMWP1 reductase OS=Escherichia coli (strain UTI89 / UPEC) GN=ybtU PE=4 SV=1 - [Q1RAF8_ECOUT]	15	4	1	4	14.48	40.8937	6.78564	0	0	1	14	0
Q82ZD8	Methionyl-tRNA formyltransferase OS=Enterococcus faecalis (strain ATCC 700802 / V583) GN=fmt PE=3 SV=1 - [FMT_ENTFA]	15	7	1	7	32.27	34.2593	6.40479	0	0	15	0	0
Q838L9	4-deoxy-L-threo-5-hexosulose-uronate ketol-isomerase 1 OS=Enterococcus faecalis (strain ATCC 700802 / V583) GN=kduI1 PE=1 SV=1 - [KDUI1_ENTFA]	15	6	1	6	34.42	31.7242	5.2876	0	0	15	0	0
Q82ZA5	Ribose-phosphate pyrophosphokinase 2 OS=Enterococcus faecalis (strain ATCC 700802 / V583) GN=prs2 PE=3 SV=1 - [KPRS2_ENTFA]	15	6	1	6	25.39	35.3706	6.62451	0	0	15	0	0
Q839G2	50S ribosomal protein L23 OS=Enterococcus faecalis (strain ATCC 700802 / V583) GN=rplW PE=3 SV=1 - [RL23_ENTFA]	15	6	1	6	57.29	11.062	9.61279	0	0	9	6	0
Q839I0	Purine nucleoside phosphorylase DeoD-type OS=Enterococcus faecalis (strain ATCC 700802 / V583) GN=deoD-2 PE=3 SV=1 - [Q839I0_ENTFA]	15	5	1	5	39.57	25.7281	5.021	0	0	15	0	0
Q831X6	Uncharacterized protein OS=Enterococcus faecalis (strain ATCC 700802 / V583) GN=EF_2369 PE=4 SV=1 - [Q831X6_ENTFA]	15	5	1	5	39.53	20.2223	4.70361	0	0	14	1	0
Q839B4	S1 RNA-binding domain protein OS=Enterococcus faecalis (strain ATCC 700802 / V583) GN=EF_0262 PE=4 SV=1 - [Q839B4_ENTFA]	15	5	1	5	42.14	17.3749	9.65674	0	0	15	0	0
Q834T0	TPR domain protein OS=Enterococcus faecalis (strain ATCC 700802 / V583) GN=EF_1553 PE=4 SV=1 - [Q834T0_ENTFA]	15	5	1	5	20.4	45.4486	4.23389	0	0	14	1	0
Q832N1	dTDP-glucose 4,6-dehydratase OS=Enterococcus faecalis (strain ATCC 700802 / V583) GN=rfbB PE=3 SV=1 - [Q832N1_ENTFA]	15	4	1	4	17.25	38.315	5.10986	0	0	8	7	0
Q839T9	Pheromone binding protein, putative OS=Enterococcus faecalis (strain ATCC 700802 / V583) GN=EF_0063 PE=4 SV=1 - [Q839T9_ENTFA]	15	6	1	6	12.34	61.439	4.91943	0	0	12	3	0
Q82Z96	Uncharacterized protein OS=Enterococcus faecalis (strain ATCC 700802 / V583) GN=EF_3174 PE=4 SV=1 - [Q82Z96_ENTFA]	15	6	1	6	41.75	22.3752	4.729	0	0	15	0	0
Q833S1	Permease, putative OS=Enterococcus faecalis (strain ATCC 700802 / V583) GN=EF_1867 PE=4 SV=1 - [Q833S1_ENTFA]	15	6	1	6	23.36	50.6207	7.48877	0	0	11	4	0
B4EVS5	Uncharacterized protein OS=Proteus mirabilis (strain HI4320) OX=529507 GN=PMI1132 PE=4 SV=1 - [B4EVS5_PROMH]	15	4	1	4	30.73	20.7863	4.65283	0	0	10	5	0
B4EYB7	Putative exported protein OS=Proteus mirabilis (strain HI4320) OX=529507 GN=PMI1603 PE=4 SV=1 - [B4EYB7_PROMH]	15	5	1	5	50.38	14.4895	9.0708	0	0	13	2	0
B4EV18	Glutamate/aspartate ABC transporter, substrate-binding protein OS=Proteus mirabilis (strain HI4320) OX=529507 GN=gltI PE=4 SV=1 - [B4EV18_PROMH]	15	6	1	6	28.28	32.7659	8.5874	0	0	15	0	0
B4F286	3'(2'),5'-bisphosphate nucleotidase CysQ OS=Proteus mirabilis (strain HI4320) OX=529507 GN=cysQ PE=3 SV=1 - [B4F286_PROMH]	15	6	1	6	32.11	27.208	5.75732	0	0	15	0	0
B4EYX5	Dihydroorotase OS=Proteus mirabilis (strain HI4320) OX=529507 GN=pyrC PE=3 SV=1 - [B4EYX5_PROMH]	15	6	1	6	28.86	38.9198	6.75635	0	0	13	2	0
Q1R3Z2	Glycerol kinase OS=Escherichia coli (strain UTI89 / UPEC) GN=glpK PE=3 SV=1 - [Q1R3Z2_ECOUT]	15	5	1	2	10.8	60.2445	6.34131	0	0	0	15	0
Q1RAZ3	Uncharacterized protein OS=Escherichia coli (strain UTI89 / UPEC) GN=yeaR PE=4 SV=1 - [Q1RAZ3_ECOUT]	15	2	1	2	35.29	13.6028	6.52197	0	0	0	15	0
K9EGP4	Uncharacterized protein OS=Actinobaculum massiliense ACS-171-V-Col2 OX=883066 GN=HMPREF9233_00832 PE=4 SV=1 - [K9EGP4_9ACTO]	15	7	1	7	33.59	27.7032	5.09717	0	0	0	0	15
K9EDB4	Uncharacterized protein OS=Actinobaculum massiliense ACS-171-V-Col2 OX=883066 GN=HMPREF9233_01005 PE=4 SV=1 - [K9EDB4_9ACTO]	15	3	1	3	7.95	56.8376	4.729	0	0	0	0	15
K9EVL8	Glycolate oxidase, subunit GlcD OS=Actinobaculum massiliense ACS-171-V-Col2 OX=883066 GN=HMPREF9233_01160 PE=4 SV=1 - [K9EVL8_9ACTO]	15	5	1	5	20.39	48.5271	4.91943	0	0	0	0	15
K9EG38	Uncharacterized protein OS=Actinobaculum massiliense ACS-171-V-Col2 OX=883066 GN=HMPREF9233_00420 PE=4 SV=1 - [K9EG38_9ACTO]	15	7	1	7	8.83	111.776	4.93213	0	0	0	0	15
Q1RFU9	Phosphoheptose isomerase OS=Escherichia coli (strain UTI89 / UPEC) GN=lpcA PE=3 SV=1 - [Q1RFU9_ECOUT]	14	2	1	1	9.76	27.137	7.82568	11	3	0	0	0
Q1R411	Superoxide dismutase OS=Escherichia coli (strain UTI89 / UPEC) GN=sodA PE=3 SV=1 - [Q1R411_ECOUT]	14	3	1	3	16.35	23.2947	6.96143	5	0	0	9	0
P42444	Protein RecA OS=Enterococcus faecalis (strain ATCC 700802 / V583) GN=recA PE=3 SV=2 - [RECA_ENTFA]	14	4	2	4	15.52	37.3864	5.26221	1	2	8	3	0
B4EZQ7	Glutamate--tRNA ligase OS=Proteus mirabilis (strain HI4320) OX=529507 GN=gltX PE=3 SV=1 - [SYE_PROMH]	14	3	2	3	9.11	53.771	6.20166	3	0	0	11	0
B4F062	Outer membrane protein assembly factor BamE OS=Proteus mirabilis (strain HI4320) OX=529507 GN=smpA PE=3 SV=1 - [B4F062_PROMH]	14	1	1	1	16.67	13.6418	8.68994	6	0	8	0	0
B4EX30	Rod shape-determining protein OS=Proteus mirabilis (strain HI4320) OX=529507 GN=mreB PE=4 SV=1 - [B4EX30_PROMH]	14	4	1	1	15.85	37.074	5.12256	2	2	10	0	0
B4F273	Ribonuclease R OS=Proteus mirabilis (strain HI4320) OX=529507 GN=rnr PE=3 SV=1 - [B4F273_PROMH]	14	6	1	6	8.32	94.4195	8.83643	8	0	5	1	0
B4F1Q0	O-antigen chain length determinant OS=Proteus mirabilis (strain HI4320) OX=529507 GN=wzz PE=4 SV=1 - [B4F1Q0_PROMH]	14	2	1	2	5.65	41.9669	6.66846	8	0	5	1	0
F2I794	50S ribosomal protein L10 OS=Aerococcus urinae (strain ACS-120-V-Col10a) GN=rplJ PE=3 SV=1 - [F2I794_AERUA]	14	4	1	4	19.77	18.8508	4.95752	10	4	0	0	0
F2I8L6	Phenylalanine--tRNA ligase beta subunit OS=Aerococcus urinae (strain ACS-120-V-Col10a) GN=pheT PE=3 SV=1 - [F2I8L6_AERUA]	14	5	1	5	7.97	90.8781	4.76709	11	3	0	0	0
F2I7S8	50S ribosomal protein L24 OS=Aerococcus urinae (strain ACS-120-V-Col10a) GN=rplX PE=3 SV=1 - [F2I7S8_AERUA]	14	2	1	2	20.59	11.2142	9.81787	10	4	0	0	0
F2I781	Exopolysaccharide biosynthesis polyprenyl glycosylphosphotransferase OS=Aerococcus urinae (strain ACS-120-V-Col10a) GN=HMPREF9243_0383 PE=4 SV=1 - [F2I781_AERUA]	14	2	1	1	4.52	53.9247	8.77783	4	9	1	0	0
F2I6J9	DNA-directed RNA polymerase subunit omega OS=Aerococcus urinae (strain ACS-120-V-Col10a) GN=rpoZ PE=3 SV=1 - [F2I6J9_AERUA]	14	1	1	1	16.22	8.23108	4.83057	7	7	0	0	0
K9EZX7	Uncharacterized protein OS=Actinobaculum massiliense ACS-171-V-Col2 OX=883066 GN=HMPREF9233_01239 PE=4 SV=1 - [K9EZX7_9ACTO]	14	2	1	2	9.7	26.2696	5.09717	5	1	0	3	5
K9EV05	30S ribosomal protein S17 OS=Actinobaculum massiliense ACS-171-V-Col2 OX=883066 GN=rpsQ PE=3 SV=1 - [K9EV05_9ACTO]	14	2	1	2	29.55	10.2925	9.70068	8	0	1	1	4
K9EG59	Translation initiation factor IF-1 OS=Actinobaculum massiliense ACS-171-V-Col2 OX=883066 GN=infA PE=3 SV=1 - [K9EG59_9ACTO]	14	3	1	3	65.75	8.37543	7.51807	3	0	2	2	7
K9EFT0	Peroxiredoxin, OsmC subfamily OS=Actinobaculum massiliense ACS-171-V-Col2 OX=883066 GN=HMPREF9233_00192 PE=4 SV=1 - [K9EFT0_9ACTO]	14	5	1	5	52.74	15.3927	4.44971	2	0	0	1	11
K9EVM2	Methionine import ATP-binding protein MetN OS=Actinobaculum massiliense ACS-171-V-Col2 OX=883066 GN=metN PE=3 SV=1 - [K9EVM2_9ACTO]	14	6	1	6	20.32	40.9249	6.43018	1	3	0	0	10
K9ECN7	Amidohydrolase OS=Actinobaculum massiliense ACS-171-V-Col2 OX=883066 GN=HMPREF9233_01172 PE=4 SV=1 - [K9ECN7_9ACTO]	14	5	1	5	22.46	44.4795	5.13525	7	1	0	0	6
K9EWR9	Uncharacterized protein OS=Actinobaculum massiliense ACS-171-V-Col2 OX=883066 GN=HMPREF9233_00737 PE=4 SV=1 - [K9EWR9_9ACTO]	14	3	1	3	19.48	25.1637	5.0083	4	0	0	0	10
K9EFV1	Acetyl-CoA C-acetyltransferase OS=Actinobaculum massiliense ACS-171-V-Col2 OX=883066 GN=HMPREF9233_00310 PE=3 SV=1 - [K9EFV1_9ACTO]	14	4	1	4	22.08	40.9648	5.2876	1	0	2	0	11
K9EIL0	Uncharacterized protein OS=Actinobaculum massiliense ACS-171-V-Col2 OX=883066 GN=HMPREF9233_00493 PE=4 SV=1 - [K9EIL0_9ACTO]	14	6	1	6	16.36	50.4426	6.15088	1	0	0	0	13
K9EUQ6	Uncharacterized protein OS=Actinobaculum massiliense ACS-171-V-Col2 OX=883066 GN=HMPREF9233_01689 PE=4 SV=1 - [K9EUQ6_9ACTO]	14	8	1	8	40.98	33.138	4.83057	3	0	0	1	10
K9EFY0	Uncharacterized protein OS=Actinobaculum massiliense ACS-171-V-Col2 OX=883066 GN=HMPREF9233_00242 PE=4 SV=1 - [K9EFY0_9ACTO]	14	7	1	7	14.33	68.3722	5.78271	3	0	0	0	11
K9EGQ8	Uncharacterized protein OS=Actinobaculum massiliense ACS-171-V-Col2 OX=883066 GN=HMPREF9233_00852 PE=4 SV=1 - [K9EGQ8_9ACTO]	14	3	1	3	23.31	16.7851	9.90576	5	0	0	0	9
P59754	30S ribosomal protein S13 OS=Enterococcus faecalis (strain ATCC 700802 / V583) GN=rpsM PE=3 SV=1 - [RS13_ENTFA]	14	3	1	2	25.62	13.5585	10.814	0	1	2	11	0
Q82ZE5	Uncharacterized protein OS=Enterococcus faecalis (strain ATCC 700802 / V583) GN=EF_3115 PE=4 SV=1 - [Q82ZE5_ENTFA]	14	1	1	1	29.17	12.9759	5.49072	0	1	9	0	4
Q839J1	Deoxyribose-phosphate aldolase OS=Enterococcus faecalis (strain ATCC 700802 / V583) GN=deoC PE=3 SV=1 - [DEOC_ENTFA]	14	5	1	5	30.45	23.0887	4.7417	0	0	13	1	0
Q839E2	Translation initiation factor IF-1 OS=Enterococcus faecalis (strain ATCC 700802 / V583) GN=infA PE=3 SV=1 - [IF1_ENTFA]	14	2	1	2	38.89	8.23132	7.41553	0	0	14	0	0
Q839F3	50S ribosomal protein L24 OS=Enterococcus faecalis (strain ATCC 700802 / V583) GN=rplX PE=3 SV=1 - [RL24_ENTFA]	14	2	1	2	19.42	11.1082	9.67139	0	0	7	7	0
Q834W6	Hydrophobic dipeptide epimerase OS=Enterococcus faecalis (strain ATCC 700802 / V583) GN=EF_1511 PE=1 SV=1 - [HYEP_ENTFA]	14	5	1	5	14.97	37.7828	4.94482	0	0	7	7	0
Q830S4	Tellurite resistance protein, putative OS=Enterococcus faecalis (strain ATCC 700802 / V583) GN=EF_2698 PE=3 SV=1 - [Q830S4_ENTFA]	14	4	1	4	12.66	44.7212	5.10986	0	0	10	4	0
Q82ZS3	Uncharacterized protein OS=Enterococcus faecalis (strain ATCC 700802 / V583) GN=EF_2975 PE=4 SV=1 - [Q82ZS3_ENTFA]	14	1	2	1	8.5	26.5485	5.09717	0	0	14	0	0
Q82YV4	Transcriptional regulator, GntR family OS=Enterococcus faecalis (strain ATCC 700802 / V583) GN=EF_3328 PE=4 SV=1 - [Q82YV4_ENTFA]	14	5	1	5	30.74	27.0492	6.16357	0	0	14	0	0
Q830S8	5'-methylthioadenosine/S-adenosylhomocysteine nucleosidase OS=Enterococcus faecalis (strain ATCC 700802 / V583) GN=pfs PE=3 SV=1 - [Q830S8_ENTFA]	14	4	1	4	20.78	24.6327	5.021	0	0	12	2	0
Q82ZT2	Uncharacterized protein OS=Enterococcus faecalis (strain ATCC 700802 / V583) GN=EF_2965 PE=4 SV=1 - [Q82ZT2_ENTFA]	14	2	1	2	27.27	10.9174	4.36084	0	0	8	6	0
Q836T7	Glycosyl hydrolase, family 1 OS=Enterococcus faecalis (strain ATCC 700802 / V583) GN=EF_1020 PE=3 SV=1 - [Q836T7_ENTFA]	14	7	1	7	21.98	53.9111	4.97021	0	0	14	0	0
B4EZP4	Putative exported protein OS=Proteus mirabilis (strain HI4320) OX=529507 GN=PMI2942 PE=4 SV=1 - [B4EZP4_PROMH]	14	4	1	4	29.58	15.5529	5.09717	0	0	9	5	0
B4EU82	Putative ATP-binding protein OS=Proteus mirabilis (strain HI4320) OX=529507 GN=PMI0144 PE=4 SV=1 - [B4EU82_PROMH]	14	4	1	4	19.08	36.8599	4.77979	0	0	8	6	0
B4EUY8	MarR-family transcriptional regulator OS=Proteus mirabilis (strain HI4320) OX=529507 GN=emrR PE=4 SV=1 - [B4EUY8_PROMH]	14	3	1	3	21.14	20.1723	5.41455	0	0	10	4	0
Q1R7Z7	PTS system, glucitol-sorbitol-specific IIB component and second of two IIC components OS=Escherichia coli (strain UTI89 / UPEC) GN=srlE PE=4 SV=1 - [Q1R7Z7_ECOUT]	14	5	1	5	21	33.3148	6.53662	0	0	0	14	0
K9EHQ5	Ribonucleoside-diphosphate reductase OS=Actinobaculum massiliense ACS-171-V-Col2 OX=883066 GN=HMPREF9233_00726 PE=3 SV=1 - [K9EHQ5_9ACTO]	14	6	1	6	13.95	81.5647	5.73193	0	0	0	2	12
K9EE51	Uncharacterized protein OS=Actinobaculum massiliense ACS-171-V-Col2 OX=883066 GN=HMPREF9233_01392 PE=4 SV=1 - [K9EE51_9ACTO]	14	4	1	4	18.21	39.5639	4.58936	0	0	0	0	14
Q1RFJ2	Beta-galactosidase OS=Escherichia coli (strain UTI89 / UPEC) GN=lacZ PE=3 SV=1 - [BGAL_ECOUT]	13	7	1	7	10.45	116.429	5.37646	1	0	0	12	0
Q1R2Q6	D-serine dehydratase 2 OS=Escherichia coli (strain UTI89 / UPEC) GN=dsdA2 PE=3 SV=1 - [SDHD2_ECOUT]	13	5	2	4	13.8	47.8501	5.77002	3	0	0	10	0
Q1RAR8	Aspartate--tRNA ligase OS=Escherichia coli (strain UTI89 / UPEC) GN=aspS PE=3 SV=1 - [SYD_ECOUT]	13	5	1	3	10	65.8276	5.77002	9	0	0	4	0
Q1R259	Purine nucleoside phosphorylase DeoD-type OS=Escherichia coli (strain UTI89 / UPEC) GN=deoD PE=3 SV=1 - [Q1R259_ECOUT]	13	4	1	2	16.28	27.9541	6.03662	3	0	0	10	0
Q1RF95	DNA-binding protein HU-beta, NS1 (HU-1) OS=Escherichia coli (strain UTI89 / UPEC) GN=hupB PE=3 SV=1 - [Q1RF95_ECOUT]	13	1	1	1	15.56	9.22	9.70068	5	6	2	0	0
Q1R9B8	Acetate kinase OS=Escherichia coli (strain UTI89 / UPEC) GN=ackA PE=3 SV=1 - [Q1R9B8_ECOUT]	13	4	1	3	19.25	43.2631	6.27783	5	1	0	7	0
Q1R7B1	Uncharacterized protein OS=Escherichia coli (strain UTI89 / UPEC) GN=yggE PE=4 SV=1 - [Q1R7B1_ECOUT]	13	3	1	3	15.45	26.6108	6.7124	1	0	0	12	0
Q1R6K1	Putative tagatose-6-phosphate ketose/aldose isomerase OS=Escherichia coli (strain UTI89 / UPEC) GN=agaS PE=4 SV=1 - [Q1R6K1_ECOUT]	13	2	1	2	6.77	41.782	5.73193	7	4	0	2	0
Q1RBM0	Hypothetical oxidoreductase YdfI OS=Escherichia coli (strain UTI89 / UPEC) GN=ydfI PE=3 SV=1 - [Q1RBM0_ECOUT]	13	6	1	5	17.08	53.6682	5.8208	9	4	0	0	0
Q1R6R2	RNA polymerase sigma factor RpoD OS=Escherichia coli (strain UTI89 / UPEC) GN=rpoD PE=3 SV=1 - [Q1R6R2_ECOUT]	13	3	1	2	6.2	70.1913	4.80518	13	0	0	0	0
Q1RBM1	Uncharacterized protein OS=Escherichia coli (strain UTI89 / UPEC) GN=ydfZ PE=4 SV=1 - [Q1RBM1_ECOUT]	13	3	1	3	50.75	7.27176	8.20654	7	6	0	0	0
B4F1K0	50S ribosomal protein L18 OS=Proteus mirabilis (strain HI4320) OX=529507 GN=rplR PE=3 SV=1 - [RL18_PROMH]	13	5	2	5	41.88	12.799	10.7407	4	0	4	5	0
B4ET93	50S ribosomal protein L25 OS=Proteus mirabilis (strain HI4320) OX=529507 GN=rplY PE=3 SV=1 - [RL25_PROMH]	13	2	1	2	24.47	10.7227	9.5249	6	0	7	0	0
B4F0Q0	Ribose-5-phosphate isomerase A OS=Proteus mirabilis (strain HI4320) OX=529507 GN=rpiA PE=3 SV=1 - [RPIA_PROMH]	13	3	2	3	20.18	23.1721	5.04639	6	0	4	3	0
B4ESY6	Methionine--tRNA ligase OS=Proteus mirabilis (strain HI4320) OX=529507 GN=metG PE=3 SV=1 - [SYM_PROMH]	13	4	1	4	7.26	76.4043	6.06201	7	1	5	0	0
B4F285	Peptidyl-prolyl cis-trans isomerase OS=Proteus mirabilis (strain HI4320) OX=529507 GN=fklB PE=3 SV=1 - [B4F285_PROMH]	13	5	1	5	27.67	22.0695	4.99561	2	1	10	0	0
B4F1X1	Putative uroporphyrin-III C-methyltransferase OS=Proteus mirabilis (strain HI4320) OX=529507 GN=hemX PE=4 SV=1 - [B4F1X1_PROMH]	13	6	1	6	18.51	46.3125	4.95752	6	0	7	0	0
B4EYS4	6-phosphogluconate dehydratase OS=Proteus mirabilis (strain HI4320) OX=529507 GN=edd PE=3 SV=1 - [B4EYS4_PROMH]	13	4	1	4	10.36	66.3069	6.53662	5	0	5	3	0
B4F1P1	Copper-transporting P-type ATPase OS=Proteus mirabilis (strain HI4320) OX=529507 GN=copA PE=3 SV=1 - [B4F1P1_PROMH]	13	4	1	4	7.52	104.096	5.45264	5	0	8	0	0
B4EWM4	Glutaredoxin OS=Proteus mirabilis (strain HI4320) OX=529507 GN=PMI1394 PE=3 SV=1 - [B4EWM4_PROMH]	13	1	2	1	11.61	12.7245	5.07178	6	2	5	0	0
F2I5Q3	Ribonuclease Y OS=Aerococcus urinae (strain ACS-120-V-Col10a) GN=rny PE=3 SV=1 - [F2I5Q3_AERUA]	13	7	1	7	16.44	58.6757	5.22412	13	0	0	0	0
F2I6C6	DNA-binding helix-turn-helix protein OS=Aerococcus urinae (strain ACS-120-V-Col10a) GN=HMPREF9243_0203 PE=4 SV=1 - [F2I6C6_AERUA]	13	1	1	1	8.25	21.6415	8.44092	8	5	0	0	0
F2I4K6	Formate/nitrite transporter OS=Aerococcus urinae (strain ACS-120-V-Col10a) GN=HMPREF9243_0965 PE=4 SV=1 - [F2I4K6_AERUA]	13	2	1	2	12.13	30.1458	9.05615	9	4	0	0	0
F2I5A5	Diaminopimelate decarboxylase OS=Aerococcus urinae (strain ACS-120-V-Col10a) GN=lysA PE=3 SV=1 - [F2I5A5_AERUA]	13	2	1	2	5.94	49.3667	5.24951	4	8	0	0	1
F2I7Q7	Pyridoxal-phosphate dependent protein OS=Aerococcus urinae (strain ACS-120-V-Col10a) GN=HMPREF9243_0499 PE=4 SV=1 - [F2I7Q7_AERUA]	13	3	1	3	13.68	30.7869	4.94482	7	6	0	0	0
F2I4L8	Malonyl CoA-acyl carrier protein transacylase OS=Aerococcus urinae (strain ACS-120-V-Col10a) GN=fabD PE=3 SV=1 - [F2I4L8_AERUA]	13	2	1	2	9.09	32.991	5.40186	6	7	0	0	0
F2I4P7	Phosphoenolpyruvate-dependent sugar phosphotransferase system, EIIA 2 OS=Aerococcus urinae (strain ACS-120-V-Col10a) GN=HMPREF9243_1014 PE=4 SV=1 - [F2I4P7_AERUA]	13	1	1	1	7.24	16.9059	5.09717	4	9	0	0	0
F2I865	DNA-binding helix-turn-helix protein OS=Aerococcus urinae (strain ACS-120-V-Col10a) GN=HMPREF9243_0586 PE=4 SV=1 - [F2I865_AERUA]	13	2	1	2	21.18	9.47701	7.51807	3	10	0	0	0
F2I570	Penicillin-binding protein, 1A family OS=Aerococcus urinae (strain ACS-120-V-Col10a) GN=HMPREF9243_1232 PE=4 SV=1 - [F2I570_AERUA]	13	6	1	6	9.12	91.6001	5.04639	8	5	0	0	0
F2I840	Putative alanine dehydrogenase OS=Aerococcus urinae (strain ACS-120-V-Col10a) GN=HMPREF9243_0560 PE=4 SV=1 - [F2I840_AERUA]	13	3	1	3	12.24	36.4685	4.93213	8	5	0	0	0
F2I5K1	Amidohydrolase family protein OS=Aerococcus urinae (strain ACS-120-V-Col10a) GN=HMPREF9243_0035 PE=4 SV=1 - [F2I5K1_AERUA]	13	1	1	1	3.28	43.312	4.88135	6	7	0	0	0
K9EGT0	Adenylosuccinate lyase OS=Actinobaculum massiliense ACS-171-V-Col2 OX=883066 GN=HMPREF9233_00635 PE=3 SV=1 - [K9EGT0_9ACTO]	13	5	1	5	12.14	57.9847	6.55127	7	0	0	0	6
K9EYL0	Peroxiredoxin OS=Actinobaculum massiliense ACS-171-V-Col2 OX=883066 GN=HMPREF9233_00185 PE=4 SV=1 - [K9EYL0_9ACTO]	13	2	1	2	22.04	20.6951	4.76709	10	0	3	0	0
K9F3B4	RelA/SpoT family protein OS=Actinobaculum massiliense ACS-171-V-Col2 OX=883066 GN=HMPREF9233_00013 PE=3 SV=1 - [K9F3B4_9ACTO]	13	5	1	5	9.67	86.2594	6.97607	4	0	0	0	9
K9F0C1	Tryptophan synthase beta chain OS=Actinobaculum massiliense ACS-171-V-Col2 OX=883066 GN=trpB PE=3 SV=1 - [K9F0C1_9ACTO]	13	5	1	5	15.99	42.6871	5.40186	2	0	0	0	11
K9ED38	4-hydroxythreonine-4-phosphate dehydrogenase OS=Actinobaculum massiliense ACS-171-V-Col2 OX=883066 GN=HMPREF9233_00935 PE=3 SV=1 - [K9ED38_9ACTO]	13	5	1	5	16.62	37.6992	5.56689	1	0	4	0	8
K9EFN2	30S ribosomal protein S18 OS=Actinobaculum massiliense ACS-171-V-Col2 OX=883066 GN=rpsR PE=3 SV=1 - [K9EFN2_9ACTO]	13	2	1	2	13.92	9.25516	11.7222	7	1	2	1	2
K9EG83	Hypoxanthine phosphoribosyltransferase OS=Actinobaculum massiliense ACS-171-V-Col2 OX=883066 GN=HMPREF9233_00475 PE=3 SV=1 - [K9EG83_9ACTO]	13	2	1	2	13.11	20.0063	5.07178	6	0	0	0	7
K9EZF2	Gluconate:H+ symporter (GntP) family transporter OS=Actinobaculum massiliense ACS-171-V-Col2 OX=883066 GN=HMPREF9233_01562 PE=4 SV=1 - [K9EZF2_9ACTO]	13	2	1	2	5.36	47.0869	7.98682	7	2	3	0	1
K9EFU2	DivIVA domain repeat protein OS=Actinobaculum massiliense ACS-171-V-Col2 OX=883066 GN=HMPREF9233_00207 PE=4 SV=1 - [K9EFU2_9ACTO]	13	5	1	5	39.23	20.4792	4.93213	3	0	0	0	10
K9EFD8	Preprotein translocase, YajC subunit OS=Actinobaculum massiliense ACS-171-V-Col2 OX=883066 GN=HMPREF9233_00017 PE=4 SV=1 - [K9EFD8_9ACTO]	13	3	1	3	37.75	16.0587	4.25928	4	2	1	0	6
K9F268	Uncharacterized protein OS=Actinobaculum massiliense ACS-171-V-Col2 OX=883066 GN=HMPREF9233_00372 PE=4 SV=1 - [K9F268_9ACTO]	13	4	1	3	13.85	49.3507	4.61475	3	2	2	0	6
K9EYF8	Uncharacterized protein OS=Actinobaculum massiliense ACS-171-V-Col2 OX=883066 GN=HMPREF9233_00110 PE=4 SV=1 - [K9EYF8_9ACTO]	13	5	1	4	27.97	26.01	5.03369	7	0	2	0	4
K9F386	Uncharacterized protein OS=Actinobaculum massiliense ACS-171-V-Col2 OX=883066 GN=HMPREF9233_00662 PE=4 SV=1 - [K9F386_9ACTO]	13	6	1	6	17.92	44.9838	4.88135	4	0	0	0	9
K9EFQ8	Uncharacterized protein OS=Actinobaculum massiliense ACS-171-V-Col2 OX=883066 GN=HMPREF9233_01668 PE=4 SV=1 - [K9EFQ8_9ACTO]	13	4	1	4	41.03	16.3268	7.43018	8	1	1	0	3
Q835R8	Protein GrpE OS=Enterococcus faecalis (strain ATCC 700802 / V583) GN=grpE PE=3 SV=1 - [GRPE_ENTFA]	13	2	1	2	13.41	20.0732	4.56396	0	0	13	0	0
Q839F4	50S ribosomal protein L14 OS=Enterococcus faecalis (strain ATCC 700802 / V583) GN=rplN PE=3 SV=1 - [RL14_ENTFA]	13	3	1	2	26.23	13.1353	10.3745	0	0	3	9	1
Q839D9	DNA-directed RNA polymerase subunit alpha OS=Enterococcus faecalis (strain ATCC 700802 / V583) GN=rpoA PE=3 SV=1 - [RPOA_ENTFA]	13	4	1	3	13.78	35.0284	4.95752	0	0	13	0	0
Q82YK1	Single-stranded DNA-binding protein OS=Enterococcus faecalis (strain ATCC 700802 / V583) GN=ssb-6 PE=3 SV=1 - [Q82YK1_ENTFA]	13	3	1	2	20	16.7844	5.26221	0	0	13	0	0
Q830J4	Glucokinase OS=Enterococcus faecalis (strain ATCC 700802 / V583) GN=glcK PE=1 SV=1 - [Q830J4_ENTFA]	13	6	1	6	22.6	34.2105	5.16064	0	0	10	3	0
Q838S5	Glyoxalase family protein OS=Enterococcus faecalis (strain ATCC 700802 / V583) GN=EF_0358 PE=4 SV=1 - [Q838S5_ENTFA]	13	7	1	7	25	36.7803	5.0083	0	0	12	1	0
Q834J5	2-dehydropantoate 2-reductase OS=Enterococcus faecalis (strain ATCC 700802 / V583) GN=EF_1655 PE=3 SV=1 - [Q834J5_ENTFA]	13	1	1	1	7.67	34.4016	5.77002	0	0	10	3	0
Q82ZZ6	D-isomer specific 2-hydroxyacid dehydrogenase family protein OS=Enterococcus faecalis (strain ATCC 700802 / V583) GN=EF_2901 PE=3 SV=1 - [Q82ZZ6_ENTFA]	13	4	1	4	15.94	35.6344	6.17627	0	0	13	0	0
Q830W2	Flavoprotein family protein OS=Enterococcus faecalis (strain ATCC 700802 / V583) GN=EF_2656 PE=4 SV=1 - [Q830W2_ENTFA]	13	3	1	3	25.54	19.8165	6.31592	0	0	13	0	0
Q831B0	PTS system, IIA component OS=Enterococcus faecalis (strain ATCC 700802 / V583) GN=EF_2603 PE=1 SV=1 - [Q831B0_ENTFA]	13	5	1	5	62.7	13.75	5.04639	0	0	13	0	0
Q834G1	Uncharacterized protein OS=Enterococcus faecalis (strain ATCC 700802 / V583) GN=EF_1692 PE=4 SV=1 - [Q834G1_ENTFA]	13	4	1	4	32.98	21.1895	4.86865	0	0	13	0	0
Q838M9	PTS system, mannitol-specfic IIBC components OS=Enterococcus faecalis (strain ATCC 700802 / V583) GN=EF_0411 PE=4 SV=1 - [Q838M9_ENTFA]	13	5	1	5	14.41	62.1312	8.57275	0	0	13	0	0
B4EXR3	ABC transporter, substrate binding protein OS=Proteus mirabilis (strain HI4320) OX=529507 GN=PMI1480 PE=4 SV=1 - [B4EXR3_PROMH]	13	5	1	5	16.44	57.6381	8.66064	0	0	11	2	0
B4EUF3	GTP pyrophosphokinase OS=Proteus mirabilis (strain HI4320) OX=529507 GN=relA PE=3 SV=1 - [B4EUF3_PROMH]	13	5	1	5	7.51	84.5014	6.41748	0	0	13	0	0
B1VJ65	HN-S family DNA-binding protein OS=Proteus mirabilis (strain HI4320) OX=529507 GN=PMIP26 PE=4 SV=1 - [B1VJ65_PROMH]	13	3	1	3	26.32	19.7433	6.25244	0	0	7	6	0
K9EJI5	N-acetylglucosamine-6-phosphate deacetylase OS=Actinobaculum massiliense ACS-171-V-Col2 OX=883066 GN=HMPREF9233_00109 PE=3 SV=1 - [K9EJI5_9ACTO]	13	6	1	6	21.19	40.822	5.09717	0	0	12	1	0
K9EIB3	Histidinol-phosphate phosphatase HisN OS=Actinobaculum massiliense ACS-171-V-Col2 OX=883066 GN=HMPREF9233_00418 PE=4 SV=1 - [K9EIB3_9ACTO]	13	3	1	3	16.6	28.7823	4.75439	0	0	2	0	11
Q1R7V9	Uncharacterized protein OS=Escherichia coli (strain UTI89 / UPEC) GN=ygbK PE=4 SV=1 - [Q1R7V9_ECOUT]	13	4	1	3	15	44.877	6.53662	0	0	0	13	0
K9EG03	Uncharacterized protein OS=Actinobaculum massiliense ACS-171-V-Col2 OX=883066 GN=HMPREF9233_00375 PE=4 SV=1 - [K9EG03_9ACTO]	13	2	1	2	16.15	27.8136	4.70361	0	0	0	0	13
K9F3I1	Uncharacterized protein OS=Actinobaculum massiliense ACS-171-V-Col2 OX=883066 GN=HMPREF9233_00108 PE=4 SV=1 - [K9F3I1_9ACTO]	13	5	1	5	28.06	27.2654	6.37939	0	0	0	0	13
K9EH68	Uncharacterized protein OS=Actinobaculum massiliense ACS-171-V-Col2 OX=883066 GN=HMPREF9233_00081 PE=4 SV=1 - [K9EH68_9ACTO]	13	2	1	2	11.48	27.117	4.80518	0	0	0	0	13
K9EEA9	Uncharacterized protein OS=Actinobaculum massiliense ACS-171-V-Col2 OX=883066 GN=HMPREF9233_01151 PE=4 SV=1 - [K9EEA9_9ACTO]	13	3	1	3	17.32	24.4837	6.22705	0	0	0	0	13
Q1R8B9	50S ribosomal protein L19 OS=Escherichia coli (strain UTI89 / UPEC) GN=rplS PE=3 SV=1 - [RL19_ECOUT]	12	2	1	1	23.48	13.1252	10.6235	1	1	3	7	0
Q1RFZ4	Proline--tRNA ligase OS=Escherichia coli (strain UTI89 / UPEC) GN=proS PE=3 SV=2 - [SYP_ECOUT]	12	6	1	4	14.69	63.5627	5.18604	8	0	0	4	0
Q1RC61	Phage shock protein B, putative inner membrane protein OS=Escherichia coli (strain UTI89 / UPEC) GN=pspB PE=4 SV=1 - [Q1RC61_ECOUT]	12	2	1	2	33.78	8.75761	7.43018	6	0	2	4	0
Q1RB81	Phenylalanine--tRNA ligase alpha subunit OS=Escherichia coli (strain UTI89 / UPEC) GN=pheS PE=3 SV=1 - [Q1RB81_ECOUT]	12	3	1	3	11.78	37.3079	6.46826	1	0	4	7	0
Q1RAN2	Ferritin OS=Escherichia coli (strain UTI89 / UPEC) GN=ftnA PE=3 SV=1 - [Q1RAN2_ECOUT]	12	3	1	3	18.82	20.0297	4.83057	5	1	0	6	0
Q1R5R6	Nitrite reductase [NAD(P)H] large subunit OS=Escherichia coli (strain UTI89 / UPEC) GN=nirB PE=3 SV=1 - [Q1R5R6_ECOUT]	12	5	1	5	8.26	93.0482	6.15088	8	1	0	3	0
B4EU53	ATP-dependent Clp protease proteolytic subunit OS=Proteus mirabilis (strain HI4320) OX=529507 GN=clpP PE=3 SV=1 - [CLPP_PROMH]	12	1	1	1	7.25	23.2336	5.41455	7	0	2	3	0
B4F2T3	30S ribosomal protein S20 OS=Proteus mirabilis (strain HI4320) OX=529507 GN=rpsT PE=3 SV=1 - [RS20_PROMH]	12	3	1	3	33.72	9.71423	11.1509	5	0	5	2	0
B4F0M6	Lysine--tRNA ligase OS=Proteus mirabilis (strain HI4320) OX=529507 GN=lysS PE=3 SV=1 - [SYK_PROMH]	12	4	1	4	9.33	57.7358	5.2749	4	1	5	2	0
B4EWC9	Ubiquinone/menaquinone biosynthesis C-methyltransferase UbiE OS=Proteus mirabilis (strain HI4320) OX=529507 GN=ubiE PE=3 SV=1 - [UBIE_PROMH]	12	3	1	3	16.33	28.3204	7.13721	5	0	4	3	0
B4ETT2	Universal stress protein E OS=Proteus mirabilis (strain HI4320) OX=529507 GN=uspE PE=1 SV=1 - [B4ETT2_PROMH]	12	3	1	3	14.56	35.9317	5.66846	3	2	7	0	0
B4F155	Two component system response regulator OS=Proteus mirabilis (strain HI4320) OX=529507 GN=cpxR PE=4 SV=1 - [B4F155_PROMH]	12	4	2	4	24.14	26.511	5.73193	3	0	7	2	0
B4F191	Pyruvate dehydrogenase [cytochrome] OS=Proteus mirabilis (strain HI4320) OX=529507 GN=poxB PE=3 SV=1 - [B4F191_PROMH]	12	4	1	4	12.02	62.3197	6.771	3	0	9	0	0
B4EUG9	TonB-dependent siderophore receptor OS=Proteus mirabilis (strain HI4320) OX=529507 GN=PMI0233 PE=3 SV=1 - [B4EUG9_PROMH]	12	4	1	4	10.53	76.3449	7.69385	12	0	0	0	0
B4EWZ0	Glycerol-3-phosphate transporter (MFS-family transporter) OS=Proteus mirabilis (strain HI4320) OX=529507 GN=glpT PE=4 SV=1 - [B4EWZ0_PROMH]	12	3	1	3	8.44	50.4407	8.48486	5	1	6	0	0
B4EUR0	Uncharacterized protein OS=Proteus mirabilis (strain HI4320) OX=529507 GN=PMI0328 PE=4 SV=1 - [B4EUR0_PROMH]	12	1	1	1	11.11	12.8414	4.88135	4	0	5	3	0
B4F2L6	Uncharacterized protein OS=Proteus mirabilis (strain HI4320) OX=529507 GN=PMI3449 PE=4 SV=1 - [B4F2L6_PROMH]	12	2	1	2	40.58	8.08827	8.93896	1	3	8	0	0
B4EVW0	Putative fumarylacetoacetate hydrolase OS=Proteus mirabilis (strain HI4320) OX=529507 GN=PMI1173 PE=4 SV=1 - [B4EVW0_PROMH]	12	3	1	3	25.69	23.9874	5.84619	1	1	10	0	0
B4EXP2	Putative lipoprotein OS=Proteus mirabilis (strain HI4320) OX=529507 GN=PMI3692 PE=4 SV=1 - [B4EXP2_PROMH]	12	3	1	3	10	64.4457	4.91943	9	0	1	2	0
B4EYI8	Aminotransferase OS=Proteus mirabilis (strain HI4320) OX=529507 GN=tyrB PE=3 SV=1 - [B4EYI8_PROMH]	12	6	1	6	19.14	44.0013	6.45557	1	0	5	6	0
B4F0P2	Xaa-proline aminopeptidase OS=Proteus mirabilis (strain HI4320) OX=529507 GN=pepP PE=4 SV=1 - [B4F0P2_PROMH]	12	4	1	4	11.24	49.4001	5.45264	2	1	6	3	0
B4F2C5	ATP-dependent RNA helicase DeaD OS=Proteus mirabilis (strain HI4320) OX=529507 GN=deaD PE=3 SV=1 - [B4F2C5_PROMH]	12	4	1	3	8.12	69.478	9.0415	12	0	0	0	0
B4EWN2	Cyclopropane-fatty-acyl-phospholipid synthase OS=Proteus mirabilis (strain HI4320) OX=529507 GN=cfa PE=4 SV=1 - [B4EWN2_PROMH]	12	2	1	2	7.03	44.278	6.97607	8	0	3	1	0
B4EX04	Signal recognition particle receptor FtsY OS=Proteus mirabilis (strain HI4320) OX=529507 GN=ftsY PE=3 SV=1 - [B4EX04_PROMH]	12	3	1	3	19.77	68.3911	4.89404	1	0	7	4	0
B4F2J9	HlyD-family secretion protein OS=Proteus mirabilis (strain HI4320) OX=529507 GN=PMI3432 PE=4 SV=1 - [B4F2J9_PROMH]	12	1	1	1	4.33	35.8131	6.43018	11	0	1	0	0
F2I5E9	Peptidyl-prolyl cis-trans isomerase OS=Aerococcus urinae (strain ACS-120-V-Col10a) GN=HMPREF9243_1340 PE=3 SV=1 - [F2I5E9_AERUA]	12	3	1	3	25.38	21.7696	4.52588	11	1	0	0	0
F2I543	Glycogen synthase OS=Aerococcus urinae (strain ACS-120-V-Col10a) GN=glgA PE=3 SV=1 - [F2I543_AERUA]	12	4	1	4	14.17	55.2235	5.56689	7	5	0	0	0
F2I8Q5	Ribosomal RNA small subunit methyltransferase G OS=Aerococcus urinae (strain ACS-120-V-Col10a) GN=gidB PE=3 SV=1 - [F2I8Q5_AERUA]	12	3	1	3	18.83	26.46	6.81494	10	2	0	0	0
F2I8T1	UPF0145 protein HMPREF9243_2033 OS=Aerococcus urinae (strain ACS-120-V-Col10a) GN=HMPREF9243_2033 PE=3 SV=1 - [F2I8T1_AERUA]	12	3	1	3	29.91	11.2586	4.76709	6	6	0	0	0
F2I4T9	Proline iminopeptidase OS=Aerococcus urinae (strain ACS-120-V-Col10a) GN=pip PE=3 SV=1 - [F2I4T9_AERUA]	12	2	1	2	6.41	36.0304	4.94482	4	8	0	0	0
F2I577	ABC transporter, ATP-binding protein OS=Aerococcus urinae (strain ACS-120-V-Col10a) GN=HMPREF9243_1241 PE=4 SV=1 - [F2I577_AERUA]	12	5	1	5	11.44	61.0666	4.97021	8	4	0	0	0
F2I5B0	Phosphoglycerate mutase family protein OS=Aerococcus urinae (strain ACS-120-V-Col10a) GN=HMPREF9243_1282 PE=4 SV=1 - [F2I5B0_AERUA]	12	3	1	3	18.82	31.6127	5.77002	12	0	0	0	0
K9EGW4	Xylulose kinase OS=Actinobaculum massiliense ACS-171-V-Col2 OX=883066 GN=xylB PE=3 SV=1 - [K9EGW4_9ACTO]	12	3	1	2	8.53	49.0838	4.86865	10	0	2	0	0
K9EY99	Protein-export membrane protein SecF OS=Actinobaculum massiliense ACS-171-V-Col2 OX=883066 GN=secF PE=3 SV=1 - [K9EY99_9ACTO]	12	6	1	6	30.13	40.7457	7.59131	2	2	0	0	8
K9EHC4	Uncharacterized protein OS=Actinobaculum massiliense ACS-171-V-Col2 OX=883066 GN=HMPREF9233_01032 PE=4 SV=1 - [K9EHC4_9ACTO]	12	2	1	2	21.61	21.0297	4.77979	2	0	1	0	9
K9F1B8	Uncharacterized protein OS=Actinobaculum massiliense ACS-171-V-Col2 OX=883066 GN=HMPREF9233_01026 PE=4 SV=1 - [K9F1B8_9ACTO]	12	2	1	2	19.13	20.6657	5.5415	3	2	0	0	7
K9EFI4	Peptide deformylase OS=Actinobaculum massiliense ACS-171-V-Col2 OX=883066 GN=def PE=3 SV=1 - [K9EFI4_9ACTO]	12	3	1	3	23.31	18.5664	4.79248	5	0	0	1	6
K9F398	Uncharacterized protein OS=Actinobaculum massiliense ACS-171-V-Col2 OX=883066 GN=HMPREF9233_00687 PE=4 SV=1 - [K9F398_9ACTO]	12	3	1	3	9.63	39.6239	4.52588	5	0	2	0	5
K9EWQ4	Uncharacterized protein OS=Actinobaculum massiliense ACS-171-V-Col2 OX=883066 GN=HMPREF9233_00732 PE=4 SV=1 - [K9EWQ4_9ACTO]	12	2	1	2	6.19	90.3746	4.75439	4	0	0	0	8
K9EJL4	GTPase HflX OS=Actinobaculum massiliense ACS-171-V-Col2 OX=883066 GN=hflX PE=3 SV=1 - [K9EJL4_9ACTO]	12	5	1	5	13.79	55.8861	5.8335	3	0	0	0	9
K9ED77	Uncharacterized protein OS=Actinobaculum massiliense ACS-171-V-Col2 OX=883066 GN=HMPREF9233_00970 PE=4 SV=1 - [K9ED77_9ACTO]	12	1	1	1	2.5	48.813	6.27783	6	2	2	2	0
K9EJM9	Uncharacterized protein OS=Actinobaculum massiliense ACS-171-V-Col2 OX=883066 GN=HMPREF9233_00179 PE=4 SV=1 - [K9EJM9_9ACTO]	12	2	1	2	13.33	31.6704	4.32275	8	1	0	0	3
K9EH86	Uncharacterized protein OS=Actinobaculum massiliense ACS-171-V-Col2 OX=883066 GN=HMPREF9233_00101 PE=4 SV=1 - [K9EH86_9ACTO]	12	5	1	5	21.45	45.9533	9.0708	4	0	0	0	8
K9EGE8	Uncharacterized protein OS=Actinobaculum massiliense ACS-171-V-Col2 OX=883066 GN=HMPREF9233_01380 PE=4 SV=1 - [K9EGE8_9ACTO]	12	2	1	2	16.27	21.8795	4.98291	2	0	0	0	10
Q834L9	Ethanolamine utilization protein EutL OS=Enterococcus faecalis (strain ATCC 700802 / V583) GN=eutL PE=4 SV=1 - [Q834L9_ENTFA]	12	3	1	3	14.29	22.5842	4.43701	0	5	7	0	0
B4EX28	3-dehydroquinate dehydratase OS=Proteus mirabilis (strain HI4320) OX=529507 GN=aroQ PE=3 SV=1 - [AROQ_PROMH]	12	3	1	3	34.69	16.1874	6.59521	0	2	5	3	2
Q834F9	30S ribosomal protein S16 OS=Enterococcus faecalis (strain ATCC 700802 / V583) GN=rpsP PE=3 SV=1 - [RS16_ENTFA]	12	4	1	4	32.97	10.3276	10.0522	0	1	10	1	0
Q833M3	Inosine-uridine preferring nucleoside hydrolase OS=Enterococcus faecalis (strain ATCC 700802 / V583) GN=EF_1921 PE=4 SV=1 - [Q833M3_ENTFA]	12	3	1	3	12.42	33.06	5.17334	0	0	12	0	0
Q836I8	Phosphoesterase OS=Enterococcus faecalis (strain ATCC 700802 / V583) GN=EF_1123 PE=3 SV=1 - [Q836I8_ENTFA]	12	2	1	2	18.82	19.2407	5.87158	0	0	12	0	0
Q82Z86	Uncharacterized protein OS=Enterococcus faecalis (strain ATCC 700802 / V583) GN=EF_3184 PE=4 SV=1 - [Q82Z86_ENTFA]	12	4	1	4	21.83	26.427	5.0083	0	0	12	0	0
Q834I1	Oxidoreductase, zinc-binding OS=Enterococcus faecalis (strain ATCC 700802 / V583) GN=EF_1671 PE=4 SV=1 - [Q834I1_ENTFA]	12	8	1	8	36.1	34.1237	5.08447	0	0	11	1	0
Q834K6	LacX protein, putative OS=Enterococcus faecalis (strain ATCC 700802 / V583) GN=EF_1644 PE=4 SV=1 - [Q834K6_ENTFA]	12	3	1	3	13.75	33.0474	4.77979	0	0	12	0	0
Q835W2	DNA-binding response regulator OS=Enterococcus faecalis (strain ATCC 700802 / V583) GN=EF_1260 PE=4 SV=1 - [Q835W2_ENTFA]	12	3	1	3	16.74	27.3546	4.84326	0	0	12	0	0
Q832K5	ABC transporter, substrate-binding protein OS=Enterococcus faecalis (strain ATCC 700802 / V583) GN=EF_2221 PE=4 SV=1 - [Q832K5_ENTFA]	12	5	1	5	12.7	54.1602	5.19873	0	0	9	3	0
Q82Z84	Uncharacterized protein OS=Enterococcus faecalis (strain ATCC 700802 / V583) GN=EF_3186 PE=4 SV=1 - [Q82Z84_ENTFA]	12	4	1	4	30.74	25.739	5.04639	0	0	12	0	0
B4EUV9	Glutamate--cysteine ligase OS=Proteus mirabilis (strain HI4320) OX=529507 GN=gshA PE=3 SV=1 - [GSH1_PROMH]	12	5	1	5	14.64	59.3103	6.30322	0	0	9	3	0
B4EXA4	Fimbrial subunit OS=Proteus mirabilis (strain HI4320) OX=529507 GN=PMI1469 PE=4 SV=1 - [B4EXA4_PROMH]	12	3	1	3	29.57	19.2848	5.94775	0	0	4	7	1
B4ESI9	N-acetylglucosamine-6-phosphate deacetylase OS=Proteus mirabilis (strain HI4320) OX=529507 GN=nagA PE=3 SV=1 - [B4ESI9_PROMH]	12	4	1	4	18.86	42.0993	5.45264	0	0	10	2	0
B4EWM7	Superoxide dismutase OS=Proteus mirabilis (strain HI4320) OX=529507 GN=sodB PE=3 SV=1 - [B4EWM7_PROMH]	12	3	1	3	19.27	21.5808	5.77002	0	0	12	0	0
Q1RAE0	Uncharacterized protein OS=Escherichia coli (strain UTI89 / UPEC) GN=UTI89_C2206 PE=4 SV=1 - [Q1RAE0_ECOUT]	12	1	1	1	6.47	19.6383	8.52881	0	0	0	12	0
K9EJA1	UDP-glucose 4-epimerase OS=Actinobaculum massiliense ACS-171-V-Col2 OX=883066 GN=HMPREF9233_00663 PE=4 SV=1 - [K9EJA1_9ACTO]	12	5	1	5	20.9	36.3152	5.09717	0	0	0	0	12
K9F1A1	Uncharacterized protein OS=Actinobaculum massiliense ACS-171-V-Col2 OX=883066 GN=HMPREF9233_01011 PE=4 SV=1 - [K9F1A1_9ACTO]	12	4	1	4	20.68	33.8111	5.07178	0	0	0	0	12
K9EFQ3	Uncharacterized protein OS=Actinobaculum massiliense ACS-171-V-Col2 OX=883066 GN=HMPREF9233_01663 PE=4 SV=1 - [K9EFQ3_9ACTO]	12	5	1	5	18.67	41.9721	5.79541	0	0	0	0	12
Q1R8M9	GMP synthase [glutamine-hydrolyzing] OS=Escherichia coli (strain UTI89 / UPEC) GN=guaA PE=3 SV=1 - [GUAA_ECOUT]	11	4	1	1	10.1	58.6279	5.38916	7	0	0	4	0
Q1R4A4	5-methyltetrahydropteroyltriglutamate--homocysteine methyltransferase OS=Escherichia coli (strain UTI89 / UPEC) GN=metE PE=3 SV=1 - [METE_ECOUT]	11	3	1	3	6.51	84.6538	5.92236	2	0	0	9	0
Q1R3L1	Single-stranded DNA-binding protein OS=Escherichia coli (strain UTI89 / UPEC) GN=ssb PE=3 SV=1 - [Q1R3L1_ECOUT]	11	1	1	1	7.04	21.4614	5.63037	3	0	0	8	0
Q1R250	ABC transporter ATP-binding protein YjjK OS=Escherichia coli (strain UTI89 / UPEC) GN=yjjK PE=4 SV=1 - [Q1R250_ECOUT]	11	6	1	5	13.33	62.3763	5.68115	1	0	0	10	0
Q1REV5	Alkyl hydroperoxide reductase, F52a subunit detoxification of hydroperoxides OS=Escherichia coli (strain UTI89 / UPEC) GN=ahpF PE=3 SV=1 - [Q1REV5_ECOUT]	11	6	1	6	16.57	57.3656	5.69385	3	3	0	5	0
Q1RFC6	6,7-dimethyl-8-ribityllumazine synthase OS=Escherichia coli (strain UTI89 / UPEC) GN=ribH PE=3 SV=1 - [Q1RFC6_ECOUT]	11	1	1	1	9.57	19.8116	9.5542	7	4	0	0	0
Q1R9Q8	Nucleoside permease OS=Escherichia coli (strain UTI89 / UPEC) GN=yeiM PE=3 SV=1 - [Q1R9Q8_ECOUT]	11	4	1	4	13.7	43.4533	8.35303	1	1	4	5	0
Q1R9A4	Histidine-binding periplasmic protein of high-affinity histidine transport system OS=Escherichia coli (strain UTI89 / UPEC) GN=hisJ PE=3 SV=1 - [Q1R9A4_ECOUT]	11	5	1	5	29.23	28.4797	5.60498	2	0	1	8	0
Q1REQ0	N-acetylglucosamine-6-phosphate deacetylase OS=Escherichia coli (strain UTI89 / UPEC) GN=nagA PE=3 SV=1 - [Q1REQ0_ECOUT]	11	5	1	5	22.25	40.9511	5.97314	1	0	0	10	0
Q1R8B6	30S ribosomal protein S16 OS=Escherichia coli (strain UTI89 / UPEC) GN=rpsP PE=3 SV=1 - [Q1R8B6_ECOUT]	11	1	1	1	10.78	11.4391	9.979	4	3	2	2	0
Q837C7	50S ribosomal protein L20 OS=Enterococcus faecalis (strain ATCC 700802 / V583) GN=rplT PE=3 SV=1 - [RL20_ENTFA]	11	3	1	3	34.45	13.6344	10.6235	3	0	6	2	0
Q837B3	Methionine--tRNA ligase OS=Enterococcus faecalis (strain ATCC 700802 / V583) GN=metG PE=3 SV=1 - [SYM_ENTFA]	11	5	1	5	9.72	76.2906	5.18604	1	0	10	0	0
Q82ZD4	Uncharacterized protein OS=Enterococcus faecalis (strain ATCC 700802 / V583) GN=EF_3130 PE=4 SV=1 - [Q82ZD4_ENTFA]	11	1	1	1	11.88	11.6398	4.81787	1	0	6	4	0
B4ETK7	Translation initiation factor IF-3 OS=Proteus mirabilis (strain HI4320) OX=529507 GN=infC PE=3 SV=1 - [IF3_PROMH]	11	2	2	2	15.64	20.5099	9.43701	2	0	2	7	0
B4EYR5	Glycerol-3-phosphate acyltransferase OS=Proteus mirabilis (strain HI4320) OX=529507 GN=plsB PE=3 SV=1 - [PLSB_PROMH]	11	6	2	6	8.34	93.9704	8.71924	3	1	7	0	0
B4F1A3	Agmatinase OS=Proteus mirabilis (strain HI4320) OX=529507 GN=speB PE=3 SV=1 - [SPEB_PROMH]	11	2	1	2	8.5	33.4516	5.96045	1	0	7	3	0
B4ETC9	3-oxoacyl-[acyl-carrier protein] reductase OS=Proteus mirabilis (strain HI4320) OX=529507 GN=fabG PE=4 SV=1 - [B4ETC9_PROMH]	11	3	1	2	15.98	25.7453	7.1958	5	0	6	0	0
B4F2E0	Glucose-specific PTS system, EIIBC component OS=Proteus mirabilis (strain HI4320) OX=529507 GN=ptsG PE=4 SV=1 - [B4F2E0_PROMH]	11	2	1	1	6.02	51.7267	9.05615	7	1	2	0	1
B4F2L0	Putative lipid carrier protein OS=Proteus mirabilis (strain HI4320) OX=529507 GN=PMI3443 PE=4 SV=1 - [B4F2L0_PROMH]	11	1	1	1	6.21	20.5206	5.0083	4	3	4	0	0
B4EVX9	NADP-dependent L-serine/L-allo-threonine dehydrogenase OS=Proteus mirabilis (strain HI4320) OX=529507 GN=ydfG PE=3 SV=1 - [B4EVX9_PROMH]	11	1	1	1	8.84	27.192	6.62451	11	0	0	0	0
B4F2V9	Putative Na+/H+ antiporter OS=Proteus mirabilis (strain HI4320) OX=529507 GN=PMI1274 PE=4 SV=1 - [B4F2V9_PROMH]	11	4	1	4	10.79	52.1754	5.96045	11	0	0	0	0
F2I6J4	Protein phosphatase 2C OS=Aerococcus urinae (strain ACS-120-V-Col10a) GN=HMPREF9243_1560 PE=4 SV=1 - [F2I6J4_AERUA]	11	2	1	2	10.93	26.3538	4.31006	6	5	0	0	0
F2I754	Response regulator receiver domain protein OS=Aerococcus urinae (strain ACS-120-V-Col10a) GN=HMPREF9243_1709 PE=4 SV=1 - [F2I754_AERUA]	11	4	1	2	23.4	26.9648	5.10986	1	4	6	0	0
F2I4X3	GTP-sensing transcriptional pleiotropic repressor CodY OS=Aerococcus urinae (strain ACS-120-V-Col10a) GN=codY PE=3 SV=1 - [F2I4X3_AERUA]	11	4	1	4	15.75	31.4032	5.13525	5	6	0	0	0
F2I592	UDP-N-acetylglucosamine 1-carboxyvinyltransferase OS=Aerococcus urinae (strain ACS-120-V-Col10a) GN=murA PE=3 SV=1 - [F2I592_AERUA]	11	4	1	4	13.04	46.9021	4.95752	8	2	0	0	1
F2I7S6	30S ribosomal protein S17 OS=Aerococcus urinae (strain ACS-120-V-Col10a) GN=rpsQ PE=3 SV=1 - [F2I7S6_AERUA]	11	1	1	1	11.36	10.4057	9.99365	6	5	0	0	0
F2I5M4	Nicotinate-nucleotide diphosphorylase (Carboxylating) OS=Aerococcus urinae (strain ACS-120-V-Col10a) GN=nadC PE=3 SV=1 - [F2I5M4_AERUA]	11	3	1	3	9.97	31.9766	5.22412	8	3	0	0	0
F2I812	Translation initiation factor IF-1 OS=Aerococcus urinae (strain ACS-120-V-Col10a) GN=infA PE=3 SV=1 - [F2I812_AERUA]	11	2	1	2	36.11	8.27426	7.25439	5	6	0	0	0
F2I7M2	D-alanine--D-alanine ligase OS=Aerococcus urinae (strain ACS-120-V-Col10a) GN=ddl PE=3 SV=1 - [F2I7M2_AERUA]	11	3	1	3	13.48	39.6701	4.84326	7	4	0	0	0
F2I652	Ferritin-like protein OS=Aerococcus urinae (strain ACS-120-V-Col10a) GN=HMPREF9243_1476 PE=3 SV=1 - [F2I652_AERUA]	11	4	1	4	35.9	17.7827	4.81787	5	6	0	0	0
F2I4A2	Exodeoxyribonuclease 7 small subunit OS=Aerococcus urinae (strain ACS-120-V-Col10a) GN=xseB PE=3 SV=1 - [F2I4A2_AERUA]	11	3	1	3	53.09	9.17942	4.37354	9	2	0	0	0
F2I8T8	Acyl-CoA dehydrogenase, C-terminal domain protein OS=Aerococcus urinae (strain ACS-120-V-Col10a) GN=HMPREF9243_2042 PE=3 SV=1 - [F2I8T8_AERUA]	11	2	1	2	5.2	45.4707	5.40186	4	7	0	0	0
K9EZV9	dTDP-4-dehydrorhamnose reductase OS=Actinobaculum massiliense ACS-171-V-Col2 OX=883066 GN=HMPREF9233_01224 PE=3 SV=1 - [K9EZV9_9ACTO]	11	6	1	6	24.91	31.6117	4.85596	2	0	0	0	9
K9EDA0	Translation initiation factor IF-3 OS=Actinobaculum massiliense ACS-171-V-Col2 OX=883066 GN=infC PE=3 SV=1 - [K9EDA0_9ACTO]	11	2	1	2	8.76	28.2439	10.3745	5	0	1	1	4
K9EJD1	Holliday junction ATP-dependent DNA helicase RuvA OS=Actinobaculum massiliense ACS-171-V-Col2 OX=883066 GN=ruvA PE=3 SV=1 - [K9EJD1_9ACTO]	11	3	1	3	26.02	20.4548	5.42725	1	0	0	0	10
K9EXS6	Uncharacterized protein OS=Actinobaculum massiliense ACS-171-V-Col2 OX=883066 GN=HMPREF9233_00579 PE=4 SV=1 - [K9EXS6_9ACTO]	11	1	1	1	6.64	26.2002	5.38916	2	0	0	0	9
K9EHF1	4-hydroxy-tetrahydrodipicolinate synthase OS=Actinobaculum massiliense ACS-171-V-Col2 OX=883066 GN=dapA PE=3 SV=1 - [K9EHF1_9ACTO]	11	4	1	4	18.79	31.1972	5.2749	7	0	3	0	1
K9EGG1	Peptide chain release factor 2 OS=Actinobaculum massiliense ACS-171-V-Col2 OX=883066 GN=prfB PE=3 SV=1 - [K9EGG1_9ACTO]	11	4	1	3	15.74	43.7228	4.67822	1	0	0	0	10
K9EWN0	Meso-diaminopimelate D-dehydrogenase OS=Actinobaculum massiliense ACS-171-V-Col2 OX=883066 GN=HMPREF9233_00717 PE=3 SV=1 - [K9EWN0_9ACTO]	11	4	1	4	19.69	34.7653	5.21143	4	0	5	0	2
K9EU69	Uncharacterized protein OS=Actinobaculum massiliense ACS-171-V-Col2 OX=883066 GN=HMPREF9233_01459 PE=4 SV=1 - [K9EU69_9ACTO]	11	3	1	3	19.59	20.9771	4.50049	2	1	0	0	8
K9EHE7	Uncharacterized protein OS=Actinobaculum massiliense ACS-171-V-Col2 OX=883066 GN=HMPREF9233_01047 PE=4 SV=1 - [K9EHE7_9ACTO]	11	4	1	4	11.11	48.6283	5.12256	1	0	0	0	10
K9EBR0	Uncharacterized protein OS=Actinobaculum massiliense ACS-171-V-Col2 OX=883066 GN=HMPREF9233_01651 PE=4 SV=1 - [K9EBR0_9ACTO]	11	2	1	2	6.1	40.4184	8.52881	7	4	0	0	0
K9EJD5	Uncharacterized protein OS=Actinobaculum massiliense ACS-171-V-Col2 OX=883066 GN=HMPREF9233_00024 PE=4 SV=1 - [K9EJD5_9ACTO]	11	4	1	4	20.86	39.6214	4.99561	2	0	0	0	9
K9EHE4	Uncharacterized protein OS=Actinobaculum massiliense ACS-171-V-Col2 OX=883066 GN=HMPREF9233_00171 PE=3 SV=1 - [K9EHE4_9ACTO]	11	4	1	4	7.24	99.7895	5.47803	1	0	0	0	10
K9EFL1	Uncharacterized protein OS=Actinobaculum massiliense ACS-171-V-Col2 OX=883066 GN=HMPREF9233_01633 PE=4 SV=1 - [K9EFL1_9ACTO]	11	3	1	3	25.98	21.9058	4.36084	7	0	0	0	4
K9EB56	Nicotinate phosphoribosyltransferase OS=Actinobaculum massiliense ACS-171-V-Col2 OX=883066 GN=HMPREF9233_01431 PE=3 SV=1 - [K9EB56_9ACTO]	11	5	1	5	12.21	50.2012	5.50342	2	0	0	0	9
K9EVJ8	Uncharacterized protein OS=Actinobaculum massiliense ACS-171-V-Col2 OX=883066 GN=HMPREF9233_01135 PE=4 SV=1 - [K9EVJ8_9ACTO]	11	3	1	3	12.46	37.8904	4.90674	2	0	0	0	9
K9F2I1	2-dehydropantoate 2-reductase OS=Actinobaculum massiliense ACS-171-V-Col2 OX=883066 GN=HMPREF9233_00467 PE=4 SV=1 - [K9F2I1_9ACTO]	11	7	1	7	33.79	30.728	7.54736	3	0	1	0	7
Q82ZB4	Large-conductance mechanosensitive channel OS=Enterococcus faecalis (strain ATCC 700802 / V583) GN=mscL PE=3 SV=1 - [MSCL_ENTFA]	11	2	1	2	17.45	16.1168	5.0083	0	1	5	5	0
Q839X8	PTS system, mannose-specific IIC component OS=Enterococcus faecalis (strain ATCC 700802 / V583) GN=EF_0021 PE=4 SV=1 - [Q839X8_ENTFA]	11	1	1	1	6.37	27.2437	4.84326	0	2	9	0	0
Q836Q1	Mn2+/Fe2+ transporter, NRAMP family OS=Enterococcus faecalis (strain ATCC 700802 / V583) GN=EF_1057 PE=4 SV=1 - [Q836Q1_ENTFA]	11	2	1	2	5.64	58.2932	7.12256	0	1	6	4	0
Q82ZQ1	Allantoinase OS=Enterococcus faecalis (strain ATCC 700802 / V583) GN=allB PE=3 SV=1 - [ALLB_ENTFA]	11	4	1	4	11.89	48.6825	4.89404	0	0	11	0	0
Q82YW1	Citrate lyase acyl carrier protein OS=Enterococcus faecalis (strain ATCC 700802 / V583) GN=citD PE=3 SV=1 - [CITD_ENTFA]	11	1	1	1	17.65	11.3678	5.03369	0	0	7	4	0
Q833N6	UDP-N-acetylmuramate--L-alanine ligase OS=Enterococcus faecalis (strain ATCC 700802 / V583) GN=murC PE=3 SV=1 - [MURC_ENTFA]	11	4	1	4	13.03	49.9677	4.98291	0	0	8	3	0
Q839F0	30S ribosomal protein S8 OS=Enterococcus faecalis (strain ATCC 700802 / V583) GN=rpsH PE=3 SV=1 - [RS8_ENTFA]	11	3	1	3	33.33	14.9031	9.14404	0	0	8	3	0
Q831Y0	Xanthine phosphoribosyltransferase OS=Enterococcus faecalis (strain ATCC 700802 / V583) GN=xpt PE=1 SV=1 - [XPT_ENTFA]	11	1	1	1	7.77	20.8409	4.88135	0	0	11	0	0
Q838Q8	Ankyrin repeat family protein OS=Enterococcus faecalis (strain ATCC 700802 / V583) GN=EF_0377 PE=1 SV=1 - [Q838Q8_ENTFA]	11	5	1	5	28.86	22.3222	4.86865	0	0	11	0	0
Q833X8	Lipoprotein, putative OS=Enterococcus faecalis (strain ATCC 700802 / V583) GN=EF_1796 PE=4 SV=1 - [Q833X8_ENTFA]	11	2	1	2	13.3	21.796	5.09717	0	0	11	0	0
Q834K5	GTP-sensing transcriptional pleiotropic repressor CodY OS=Enterococcus faecalis (strain ATCC 700802 / V583) GN=codY PE=3 SV=1 - [Q834K5_ENTFA]	11	2	1	2	12.31	28.9071	5.17334	0	0	5	6	0
Q830N9	Thioredoxin reductase/glutathione-related protein OS=Enterococcus faecalis (strain ATCC 700802 / V583) GN=EF_2738 PE=4 SV=1 - [Q830N9_ENTFA]	11	5	1	5	16.79	61.1703	5.17334	0	0	9	2	0
Q834A8	Cell division ATP-binding protein FtsE OS=Enterococcus faecalis (strain ATCC 700802 / V583) GN=ftsE PE=4 SV=1 - [Q834A8_ENTFA]	11	3	1	3	19.74	25.8307	9.36377	0	0	9	2	0
Q82YK3	Uncharacterized protein OS=Enterococcus faecalis (strain ATCC 700802 / V583) GN=EF_B0041 PE=4 SV=1 - [Q82YK3_ENTFA]	11	3	1	3	51.32	8.81568	9.48096	0	0	11	0	0
Q82YI8	Uncharacterized protein OS=Enterococcus faecalis (strain ATCC 700802 / V583) GN=EF_B0057 PE=4 SV=1 - [Q82YI8_ENTFA]	11	3	1	3	38.74	12.7746	6.771	0	0	10	1	0
B4EVE1	Methylglyoxal synthase OS=Proteus mirabilis (strain HI4320) OX=529507 GN=mgsA PE=3 SV=1 - [MGSA_PROMH]	11	3	1	3	25	16.9878	6.88818	0	0	4	7	0
B4EZM8	Fe/S biogenesis protein NfuA OS=Proteus mirabilis (strain HI4320) OX=529507 GN=nfuA PE=3 SV=1 - [NFUA_PROMH]	11	3	1	3	21.88	21.1025	4.60205	0	0	9	2	0
B4EZR9	Cysteine synthase OS=Proteus mirabilis (strain HI4320) OX=529507 GN=cysM PE=3 SV=1 - [B4EZR9_PROMH]	11	4	1	4	19.11	31.5632	6.12549	0	0	11	0	0
B4EYK1	Bifunctional protein PutA OS=Proteus mirabilis (strain HI4320) OX=529507 GN=putA PE=3 SV=1 - [B4EYK1_PROMH]	11	7	1	7	6.88	145.257	6.20166	0	0	11	0	0
B4EXX6	Uncharacterized protein OS=Proteus mirabilis (strain HI4320) OX=529507 GN=PMI2598 PE=4 SV=1 - [B4EXX6_PROMH]	11	2	1	2	15.1	28.1263	6.80029	0	0	9	2	0
B4EWZ9	P-type cation-translocating membrane ATPase OS=Proteus mirabilis (strain HI4320) OX=529507 GN=ppaA PE=3 SV=1 - [B4EWZ9_PROMH]	11	5	1	5	9.36	83.5485	5.98584	0	0	11	0	0
K9F1E2	Aspartate-semialdehyde dehydrogenase OS=Actinobaculum massiliense ACS-171-V-Col2 OX=883066 GN=asd PE=3 SV=1 - [K9F1E2_9ACTO]	11	4	1	4	21.12	39.0219	5.21143	0	0	1	0	10
K9EVP9	Uncharacterized protein OS=Actinobaculum massiliense ACS-171-V-Col2 OX=883066 GN=HMPREF9233_01195 PE=4 SV=1 - [K9EVP9_9ACTO]	11	4	1	4	21.68	25.3641	4.99561	0	0	0	0	11
K9EDG4	Uncharacterized protein OS=Actinobaculum massiliense ACS-171-V-Col2 OX=883066 GN=HMPREF9233_01690 PE=4 SV=1 - [K9EDG4_9ACTO]	11	2	1	2	7.91	41.723	5.42725	0	0	0	0	11
K9EFB2	Cof-like hydrolase OS=Actinobaculum massiliense ACS-171-V-Col2 OX=883066 GN=HMPREF9233_01089 PE=4 SV=1 - [K9EFB2_9ACTO]	11	3	1	3	15.54	32.3071	4.81787	0	0	0	0	11
K9EU88	Uncharacterized protein OS=Actinobaculum massiliense ACS-171-V-Col2 OX=883066 GN=HMPREF9233_01484 PE=4 SV=1 - [K9EU88_9ACTO]	11	1	1	1	9.65	24.6027	5.32568	0	0	0	0	11
K9EU96	NAD(P) transhydrogenase subunit beta OS=Actinobaculum massiliense ACS-171-V-Col2 OX=883066 GN=HMPREF9233_01494 PE=3 SV=1 - [K9EU96_9ACTO]	11	2	1	2	8.85	50.5587	5.8208	0	0	0	0	11
K9EXJ2	Uncharacterized protein OS=Actinobaculum massiliense ACS-171-V-Col2 OX=883066 GN=HMPREF9233_00494 PE=4 SV=1 - [K9EXJ2_9ACTO]	11	3	1	3	16.43	30.3786	4.57666	0	0	0	0	11
K9EBB1	Uncharacterized protein OS=Actinobaculum massiliense ACS-171-V-Col2 OX=883066 GN=HMPREF9233_01506 PE=4 SV=1 - [K9EBB1_9ACTO]	11	4	1	4	13.97	40.131	5.56689	0	0	0	0	11
Q1RGH6	Isoleucine--tRNA ligase OS=Escherichia coli (strain UTI89 / UPEC) GN=ileS PE=3 SV=1 - [SYI_ECOUT]	10	3	1	3	4.05	104.288	5.94775	7	1	0	2	0
Q1RG27	Periplasmic serine endoprotease DegP-like OS=Escherichia coli (strain UTI89 / UPEC) GN=degP PE=3 SV=1 - [Q1RG27_ECOUT]	10	3	1	3	8.65	49.3085	8.55811	5	1	0	4	0
Q1R8K2	Cysteine desulfurase IscS OS=Escherichia coli (strain UTI89 / UPEC) GN=iscS PE=3 SV=1 - [Q1R8K2_ECOUT]	10	2	1	1	6.07	46.0324	6.48096	5	0	0	5	0
Q1R386	Protein HflK OS=Escherichia coli (strain UTI89 / UPEC) GN=hflK PE=3 SV=1 - [Q1R386_ECOUT]	10	4	1	4	11.93	45.5481	6.02393	1	0	0	9	0
Q1RCL1	Respiratory nitrate reductase 1 alpha chain OS=Escherichia coli (strain UTI89 / UPEC) GN=narG PE=3 SV=1 - [Q1RCL1_ECOUT]	10	5	1	5	6.17	140.501	6.53662	8	0	0	2	0
Q1R223	ABC transporter, ATP-binding protein OS=Escherichia coli (strain UTI89 / UPEC) GN=UTI89_P015 PE=4 SV=1 - [Q1R223_ECOUT]	10	4	1	4	21.21	25.5582	6.01123	4	1	0	5	0
Q1RFV1	Inhibitor of vertebrate lysozyme OS=Escherichia coli (strain UTI89 / UPEC) GN=ykfE PE=4 SV=1 - [Q1RFV1_ECOUT]	10	3	1	3	31.85	16.8713	6.771	2	0	0	8	0
Q1R6Z1	TonB-dependent enterochelin uptake protein OS=Escherichia coli (strain UTI89 / UPEC) GN=exbB PE=3 SV=1 - [Q1R6Z1_ECOUT]	10	3	1	3	16.39	26.2709	8.1626	3	0	0	7	0
Q1RAN7	L-arabinose-binding periplasmic protein OS=Escherichia coli (strain UTI89 / UPEC) GN=araF PE=4 SV=1 - [Q1RAN7_ECOUT]	10	3	1	3	13.29	37.4994	8.01611	2	4	0	4	0
Q1R6N2	Uncharacterized protein OS=Escherichia coli (strain UTI89 / UPEC) GN=yqjD PE=4 SV=1 - [Q1R6N2_ECOUT]	10	1	1	1	15.84	11.0449	9.08545	5	0	0	5	0
B4ET28	Integration host factor subunit beta OS=Proteus mirabilis (strain HI4320) OX=529507 GN=ihfB PE=3 SV=1 - [IHFB_PROMH]	10	2	1	2	27.37	10.7776	7.57666	1	0	3	6	0
B4EVS0	2-dehydro-3-deoxyphosphooctonate aldolase OS=Proteus mirabilis (strain HI4320) OX=529507 GN=kdsA PE=3 SV=1 - [KDSA_PROMH]	10	4	1	1	20.42	30.8468	6.16357	5	0	2	3	0
B4EUT9	Na(+)-translocating NADH-quinone reductase subunit F OS=Proteus mirabilis (strain HI4320) OX=529507 GN=nqrF PE=3 SV=1 - [B4EUT9_PROMH]	10	4	1	4	14.95	45.7388	5.0083	2	0	8	0	0
B4EW42	Uncharacterized protein OS=Proteus mirabilis (strain HI4320) OX=529507 GN=PMI2354 PE=4 SV=1 - [B4EW42_PROMH]	10	2	1	2	22.12	11.8063	4.88135	4	0	1	5	0
B4EWL6	Tyrosine--tRNA ligase OS=Proteus mirabilis (strain HI4320) OX=529507 GN=tyrS PE=3 SV=1 - [B4EWL6_PROMH]	10	8	1	7	23.36	48.0105	5.65576	2	0	7	1	0
B4EUG8	Putative siderophore biosynthesis protein OS=Proteus mirabilis (strain HI4320) OX=529507 GN=PMI0232 PE=4 SV=1 - [B4EUG8_PROMH]	10	3	1	3	6.7	72.6357	6.29053	2	0	6	2	0
B4EUR6	Putative membrane protein OS=Proteus mirabilis (strain HI4320) OX=529507 GN=PMI0334 PE=4 SV=1 - [B4EUR6_PROMH]	10	1	1	1	6.95	21.1668	9.48096	7	0	3	0	0
B4EY56	Uncharacterized protein OS=Proteus mirabilis (strain HI4320) OX=529507 GN=PMI1542 PE=4 SV=1 - [B4EY56_PROMH]	10	2	1	2	35.06	9.01092	10.3306	6	0	3	1	0
B4EST5	Molybdenum transport regulatory protein OS=Proteus mirabilis (strain HI4320) OX=529507 GN=modR PE=4 SV=1 - [B4EST5_PROMH]	10	1	1	1	5.32	28.7241	5.87158	9	0	1	0	0
B4EV68	Putative major fimbrial subunit OS=Proteus mirabilis (strain HI4320) OX=529507 GN=uca PE=4 SV=1 - [B4EV68_PROMH]	10	2	1	2	16.57	19.0566	5.47803	4	1	5	0	0
B4EYH1	O-acetylhomoserine sulfhydrylase OS=Proteus mirabilis (strain HI4320) OX=529507 GN=cysD PE=3 SV=1 - [B4EYH1_PROMH]	10	3	1	2	10.38	45.7716	6.39209	4	0	6	0	0
B4EVU9	Putative endoribonuclease OS=Proteus mirabilis (strain HI4320) OX=529507 GN=PMI1162 PE=4 SV=1 - [B4EVU9_PROMH]	10	2	1	2	23.68	12.6345	4.79248	1	0	3	6	0
B4EZ29	DNA gyrase subunit A OS=Proteus mirabilis (strain HI4320) OX=529507 GN=gyrA PE=3 SV=1 - [B4EZ29_PROMH]	10	4	1	4	5.7	97.7875	5.07178	8	0	2	0	0
F2I636	Uncharacterized protein OS=Aerococcus urinae (strain ACS-120-V-Col10a) GN=HMPREF9243_0178 PE=4 SV=1 - [F2I636_AERUA]	10	4	1	4	11.52	38.5947	6.75635	6	4	0	0	0
F2I765	Inosine-uridine preferring nucleoside hydrolase OS=Aerococcus urinae (strain ACS-120-V-Col10a) GN=HMPREF9243_1722 PE=4 SV=1 - [F2I765_AERUA]	10	4	1	3	13.56	33.9242	4.64014	5	5	0	0	0
F2I6Z1	Oxidoreductase, short chain dehydrogenase/reductase family protein OS=Aerococcus urinae (strain ACS-120-V-Col10a) GN=HMPREF9243_0367 PE=3 SV=1 - [F2I6Z1_AERUA]	10	3	1	3	21.83	26.7877	4.95752	6	4	0	0	0
F2I852	Oxidoreductase, FAD/FMN-binding protein OS=Aerococcus urinae (strain ACS-120-V-Col10a) GN=HMPREF9243_0573 PE=4 SV=1 - [F2I852_AERUA]	10	2	1	2	8.11	45.8531	5.51611	7	3	0	0	0
F2I6Q1	ABC transporter, permease protein OS=Aerococcus urinae (strain ACS-120-V-Col10a) GN=HMPREF9243_1622 PE=3 SV=1 - [F2I6Q1_AERUA]	10	3	1	3	15.92	34.7918	9.23193	6	4	0	0	0
F2I4Z5	Protein GrpE OS=Aerococcus urinae (strain ACS-120-V-Col10a) GN=grpE PE=3 SV=1 - [F2I4Z5_AERUA]	10	3	1	3	18.18	25.2606	4.91943	6	4	0	0	0
F2I6K9	30S ribosomal protein S20 OS=Aerococcus urinae (strain ACS-120-V-Col10a) GN=rpsT PE=3 SV=1 - [F2I6K9_AERUA]	10	2	1	2	34.52	9.359	10.3452	10	0	0	0	0
F2I586	HesB-like protein OS=Aerococcus urinae (strain ACS-120-V-Col10a) GN=HMPREF9243_1252 PE=4 SV=1 - [F2I586_AERUA]	10	1	1	1	12.37	11.1844	4.33545	6	4	0	0	0
K9EG46	Demethylmenaquinone methyltransferase OS=Actinobaculum massiliense ACS-171-V-Col2 OX=883066 GN=menG PE=3 SV=1 - [K9EG46_9ACTO]	10	2	1	2	10.89	26.7878	6.7124	3	0	0	0	7
K9EGT8	D-aminoacyl-tRNA deacylase OS=Actinobaculum massiliense ACS-171-V-Col2 OX=883066 GN=dtd PE=3 SV=1 - [K9EGT8_9ACTO]	10	1	1	1	8.5	16.6337	5.04639	3	1	2	0	4
K9EXA0	Homoserine kinase OS=Actinobaculum massiliense ACS-171-V-Col2 OX=883066 GN=thrB PE=3 SV=1 - [K9EXA0_9ACTO]	10	4	1	4	25.17	31.7715	5.79541	3	0	0	0	7
K9F0Y1	Uncharacterized protein OS=Actinobaculum massiliense ACS-171-V-Col2 OX=883066 GN=HMPREF9233_00921 PE=4 SV=1 - [K9F0Y1_9ACTO]	10	3	1	3	23.5	26.2467	5.92236	1	0	0	0	9
K9EFX0	Uncharacterized protein OS=Actinobaculum massiliense ACS-171-V-Col2 OX=883066 GN=HMPREF9233_00335 PE=4 SV=1 - [K9EFX0_9ACTO]	10	1	1	1	7.69	16.5296	4.93213	3	0	0	0	7
K9F0G2	Uncharacterized protein OS=Actinobaculum massiliense ACS-171-V-Col2 OX=883066 GN=HMPREF9233_01098 PE=3 SV=1 - [K9F0G2_9ACTO]	10	6	1	6	27.16	43.609	5.2876	3	0	1	0	6
K9EBL7	Endolytic murein transglycosylase OS=Actinobaculum massiliense ACS-171-V-Col2 OX=883066 GN=mltG PE=3 SV=1 - [K9EBL7_9ACTO]	10	3	1	3	11.98	41.7563	5.32568	1	0	0	0	9
K9ED35	OpcA protein OS=Actinobaculum massiliense ACS-171-V-Col2 OX=883066 GN=HMPREF9233_01550 PE=4 SV=1 - [K9ED35_9ACTO]	10	3	1	3	11.56	34.0195	5.5415	2	0	0	0	8
K9EYD8	Uncharacterized protein OS=Actinobaculum massiliense ACS-171-V-Col2 OX=883066 GN=HMPREF9233_00080 PE=4 SV=1 - [K9EYD8_9ACTO]	10	2	1	2	15.76	18.7913	4.53857	3	0	0	0	7
K9EG64	Dihydrodipicolinate synthase OS=Actinobaculum massiliense ACS-171-V-Col2 OX=883066 GN=HMPREF9233_00455 PE=3 SV=1 - [K9EG64_9ACTO]	10	2	1	2	8.64	32.6278	4.84326	8	2	0	0	0
K9F1V0	Uncharacterized protein OS=Actinobaculum massiliense ACS-171-V-Col2 OX=883066 GN=HMPREF9233_00785 PE=4 SV=1 - [K9F1V0_9ACTO]	10	5	1	5	23.42	34.5705	4.94482	1	0	0	0	9
K9EFL3	Beta sliding clamp OS=Actinobaculum massiliense ACS-171-V-Col2 OX=883066 GN=HMPREF9233_00778 PE=3 SV=1 - [K9EFL3_9ACTO]	10	3	1	3	14.06	40.6536	4.77979	1	0	0	0	9
K9EH01	Uncharacterized protein OS=Actinobaculum massiliense ACS-171-V-Col2 OX=883066 GN=HMPREF9233_00957 PE=4 SV=1 - [K9EH01_9ACTO]	10	3	1	3	9.36	53.0961	4.81787	4	0	0	0	6
Q1R8X8	Glucokinase OS=Escherichia coli (strain UTI89 / UPEC) GN=glk PE=3 SV=1 - [GLK_ECOUT]	10	2	1	2	8.41	34.687	6.52197	0	1	0	9	0
Q832Z7	Uncharacterized protein OS=Enterococcus faecalis (strain ATCC 700802 / V583) GN=EF_2071 PE=4 SV=1 - [Q832Z7_ENTFA]	10	2	1	2	16.67	12.9327	9.36377	0	1	6	3	0
Q835R5	Chaperone protein DnaJ OS=Enterococcus faecalis (strain ATCC 700802 / V583) GN=dnaJ PE=3 SV=1 - [DNAJ_ENTFA]	10	4	1	4	12.34	41.8705	6.7417	0	0	9	1	0
O07108	UDP-N-acetylmuramoylalanine--D-glutamate ligase OS=Enterococcus faecalis (strain ATCC 700802 / V583) GN=murD PE=3 SV=2 - [MURD_ENTFA]	10	5	1	5	15.57	49.6668	5.09717	0	0	9	1	0
Q837Y9	Foldase protein PrsA OS=Enterococcus faecalis (strain ATCC 700802 / V583) GN=prsA PE=3 SV=1 - [PRSA_ENTFA]	10	1	1	1	4.09	37.3699	8.22119	0	0	2	8	0
Q839F9	50S ribosomal protein L22 OS=Enterococcus faecalis (strain ATCC 700802 / V583) GN=rplV PE=3 SV=1 - [RL22_ENTFA]	10	2	1	2	18.26	12.4458	10.228	0	0	7	3	0
Q836X4	50S ribosomal protein L27 OS=Enterococcus faecalis (strain ATCC 700802 / V583) GN=rpmA PE=3 SV=1 - [RL27_ENTFA]	10	2	1	2	34.74	10.1523	10.1401	0	0	3	7	0
P59631	UPF0145 protein EF_0241 OS=Enterococcus faecalis (strain ATCC 700802 / V583) GN=EF_0241 PE=3 SV=1 - [Y241_ENTFA]	10	1	1	1	17.48	11.1967	5.51611	0	0	10	0	0
Q830K2	Nucleoid-associated protein EF_2780 OS=Enterococcus faecalis (strain ATCC 700802 / V583) GN=EF_2780 PE=3 SV=1 - [Y2780_ENTFA]	10	2	1	2	43.27	11.6557	4.81787	0	0	10	0	0
Q836C7	Acid sugar phosphatase OS=Enterococcus faecalis (strain ATCC 700802 / V583) GN=EF_1188 PE=1 SV=1 - [Q836C7_ENTFA]	10	3	1	3	12.5	28.0686	4.80518	0	0	10	0	0
Q838D9	Glyoxalase family protein OS=Enterococcus faecalis (strain ATCC 700802 / V583) GN=EF_0630 PE=4 SV=1 - [Q838D9_ENTFA]	10	3	1	3	35.63	17.4758	4.89404	0	0	10	0	0
Q834C3	Uncharacterized protein OS=Enterococcus faecalis (strain ATCC 700802 / V583) GN=EF_1745 PE=4 SV=1 - [Q834C3_ENTFA]	10	4	1	4	42.66	15.0663	9.23193	0	0	7	3	0
Q834U7	Uncharacterized protein OS=Enterococcus faecalis (strain ATCC 700802 / V583) GN=EF_1535 PE=4 SV=1 - [Q834U7_ENTFA]	10	1	1	1	3.86	41.4955	5.33838	0	0	4	6	0
Q837H4	Glycine betaine/carnitine/choline transporter, ATP-binding protein OS=Enterococcus faecalis (strain ATCC 700802 / V583) GN=EF_0865 PE=4 SV=1 - [Q837H4_ENTFA]	10	5	1	5	14.36	44.7087	5.36377	0	0	8	2	0
Q831R2	PTS system, IIA component OS=Enterococcus faecalis (strain ATCC 700802 / V583) GN=EF_2438 PE=4 SV=1 - [Q831R2_ENTFA]	10	3	1	3	38.41	17.3649	4.76709	0	0	10	0	0
Q835G9	ABC transporter, ATP-binding protein OS=Enterococcus faecalis (strain ATCC 700802 / V583) GN=EF_1408 PE=4 SV=1 - [Q835G9_ENTFA]	10	4	1	4	21.4	33.5076	6.12549	0	0	10	0	0
Q839D6	Peptidase, M20/M25/M40 family OS=Enterococcus faecalis (strain ATCC 700802 / V583) GN=EF_0236 PE=4 SV=1 - [Q839D6_ENTFA]	10	5	1	5	16.18	41.2103	5.05908	0	0	8	2	0
Q838R1	Lipoprotein, putative OS=Enterococcus faecalis (strain ATCC 700802 / V583) GN=EF_0374 PE=4 SV=1 - [Q838R1_ENTFA]	10	6	1	5	22.15	36.1417	4.89404	0	0	10	0	0
Q834V7	Uncharacterized protein OS=Enterococcus faecalis (strain ATCC 700802 / V583) GN=EF_1524 PE=4 SV=1 - [Q834V7_ENTFA]	10	2	1	2	8.87	33.0584	7.63525	0	0	6	4	0
Q836M0	von Willebrand factor type A domain protein OS=Enterococcus faecalis (strain ATCC 700802 / V583) GN=EF_1091 PE=4 SV=1 - [Q836M0_ENTFA]	10	3	1	3	3.63	122.659	5.17334	0	0	10	0	0
Q831Y4	Adenylosuccinate lyase OS=Enterococcus faecalis (strain ATCC 700802 / V583) GN=purB PE=3 SV=1 - [Q831Y4_ENTFA]	10	5	1	4	13.92	49.1411	6.07471	0	0	9	1	0
B4EV91	Outer-membrane lipoprotein carrier protein OS=Proteus mirabilis (strain HI4320) OX=529507 GN=lolA PE=3 SV=1 - [LOLA_PROMH]	10	4	1	4	39.8	22.5633	5.60498	0	0	10	0	0
B4EUW7	50S ribosomal protein L19 OS=Proteus mirabilis (strain HI4320) OX=529507 GN=rplS PE=3 SV=1 - [RL19_PROMH]	10	2	1	1	23.08	13.3373	10.6528	0	0	7	3	0
B4EVN4	Putative exported protein OS=Proteus mirabilis (strain HI4320) OX=529507 GN=PMI1010 PE=4 SV=1 - [B4EVN4_PROMH]	10	2	1	2	40.71	12.6545	6.60986	0	0	10	0	0
B4F2H0	Thiamine ABC transporter, substrate-binding protein OS=Proteus mirabilis (strain HI4320) OX=529507 GN=thiB PE=4 SV=1 - [B4F2H0_PROMH]	10	6	1	6	27.6	38.0842	6.56592	0	0	9	1	0
K9EVD7	Serine hydroxymethyltransferase OS=Actinobaculum massiliense ACS-171-V-Col2 OX=883066 GN=glyA PE=3 SV=1 - [K9EVD7_9ACTO]	10	4	1	4	16.75	45.4053	6.12549	0	0	5	0	5
K9EI52	Uncharacterized protein OS=Actinobaculum massiliense ACS-171-V-Col2 OX=883066 GN=HMPREF9233_00343 PE=4 SV=1 - [K9EI52_9ACTO]	10	4	1	4	19	34.7916	5.17334	0	0	5	0	5
K9ECE2	Uncharacterized protein OS=Actinobaculum massiliense ACS-171-V-Col2 OX=883066 GN=HMPREF9233_01353 PE=4 SV=1 - [K9ECE2_9ACTO]	10	4	1	4	16.99	44.684	5.50342	0	0	3	0	7
Q1REI5	Protein TolB OS=Escherichia coli (strain UTI89 / UPEC) GN=tolB PE=3 SV=2 - [TOLB_ECOUT]	10	5	1	4	15.58	45.9272	7.59131	0	0	0	10	0
Q1R6N7	Hexuronate transporter OS=Escherichia coli (strain UTI89 / UPEC) GN=exuT PE=4 SV=1 - [Q1R6N7_ECOUT]	10	4	1	4	8.9	51.5516	8.79248	0	0	0	10	0
Q1RDL5	Periplasmic glucose-1-phosphatase OS=Escherichia coli (strain UTI89 / UPEC) GN=agp PE=4 SV=1 - [Q1RDL5_ECOUT]	10	4	1	4	11.62	45.6749	5.85889	0	0	0	10	0
Q1R4Z8	Mannitol-1-phosphate 5-dehydrogenase OS=Escherichia coli (strain UTI89 / UPEC) GN=mtlD PE=3 SV=1 - [Q1R4Z8_ECOUT]	10	2	1	2	6.79	47.6429	6.30322	0	0	0	10	0
Q833V0	Alcohol dehydrogenase, zinc-containing OS=Enterococcus faecalis (strain ATCC 700802 / V583) GN=EF_1826 PE=3 SV=1 - [Q833V0_ENTFA]	10	1	1	1	6.51	35.9373	6.06201	0	0	0	0	10
K9F3L0	UDP-N-acetylmuramoyl-tripeptide--D-alanyl-D-alanine ligase OS=Actinobaculum massiliense ACS-171-V-Col2 OX=883066 GN=murF PE=3 SV=1 - [K9F3L0_9ACTO]	10	4	1	4	14.78	47.5832	5.38916	0	0	0	0	10
K9EF72	Uncharacterized protein OS=Actinobaculum massiliense ACS-171-V-Col2 OX=883066 GN=HMPREF9233_01054 PE=4 SV=1 - [K9EF72_9ACTO]	10	4	1	4	27.57	22.7925	4.60205	0	0	0	0	10
K9ECZ6	Uncharacterized protein OS=Actinobaculum massiliense ACS-171-V-Col2 OX=883066 GN=HMPREF9233_00895 PE=4 SV=1 - [K9ECZ6_9ACTO]	10	3	1	3	20.79	30.3796	4.32275	0	0	0	0	10
K9EYC4	Uncharacterized protein OS=Actinobaculum massiliense ACS-171-V-Col2 OX=883066 GN=HMPREF9233_00055 PE=3 SV=1 - [K9EYC4_9ACTO]	10	5	1	5	20.9	38.4789	5.41455	0	0	0	0	10
K9EFB7	Uncharacterized protein OS=Actinobaculum massiliense ACS-171-V-Col2 OX=883066 GN=HMPREF9233_00681 PE=4 SV=1 - [K9EFB7_9ACTO]	10	5	1	5	22.39	38.1412	5.50342	0	0	0	0	10
K9EIS6	Uncharacterized protein OS=Actinobaculum massiliense ACS-171-V-Col2 OX=883066 GN=HMPREF9233_00538 PE=4 SV=1 - [K9EIS6_9ACTO]	10	3	1	3	27.66	21.4787	6.60986	0	0	0	0	10
Q1RGC3	2-isopropylmalate synthase OS=Escherichia coli (strain UTI89 / UPEC) GN=leuA PE=3 SV=1 - [LEU1_ECOUT]	9	4	1	4	8.99	57.2481	5.71924	5	2	0	2	0
Q1R6A9	50S ribosomal protein L13 OS=Escherichia coli (strain UTI89 / UPEC) GN=rplM PE=3 SV=2 - [RL13_ECOUT]	9	3	1	1	21.13	16.0085	9.90576	4	1	0	4	0
Q1R537	Glycine--tRNA ligase beta subunit OS=Escherichia coli (strain UTI89 / UPEC) GN=glyS PE=3 SV=1 - [SYGB_ECOUT]	9	4	1	4	8.85	76.765	5.43994	7	0	0	2	0
Q1R542	Uncharacterized protein OS=Escherichia coli (strain UTI89 / UPEC) GN=yiaF PE=4 SV=1 - [Q1R542_ECOUT]	9	2	1	2	9.06	30.1395	9.23193	6	0	0	3	0
Q1REW8	Enterobactin synthetase component E OS=Escherichia coli (strain UTI89 / UPEC) GN=entE PE=4 SV=1 - [Q1REW8_ECOUT]	9	2	1	2	5.22	59.0481	5.63037	9	0	0	0	0
Q1RBS4	Putative sulfatase YdeN OS=Escherichia coli (strain UTI89 / UPEC) GN=ydeN PE=4 SV=1 - [Q1RBS4_ECOUT]	9	3	1	3	7.71	64.0948	6.27783	5	0	0	4	0
Q1RCJ3	Periplasmic oligopeptide-binding protein OS=Escherichia coli (strain UTI89 / UPEC) GN=oppA PE=4 SV=1 - [Q1RCJ3_ECOUT]	9	5	1	5	13.93	63.5482	6.43018	4	1	2	2	0
Q1R9Q3	Phosphofructokinase OS=Escherichia coli (strain UTI89 / UPEC) GN=fruK PE=3 SV=1 - [Q1R9Q3_ECOUT]	9	3	1	3	12.82	33.7344	5.5415	4	0	0	5	0
Q1R6G0	ATP-dependent zinc metalloprotease FtsH OS=Escherichia coli (strain UTI89 / UPEC) GN=mrsC PE=3 SV=1 - [Q1R6G0_ECOUT]	9	6	1	3	11.8	70.6634	6.23975	3	0	0	6	0
B4F0B1	3-dehydroquinate synthase OS=Proteus mirabilis (strain HI4320) OX=529507 GN=aroB PE=3 SV=1 - [AROB_PROMH]	9	3	2	3	12.36	39.6737	6.62451	4	0	2	3	0
B4ETX3	D-alanine--D-alanine ligase OS=Proteus mirabilis (strain HI4320) OX=529507 GN=ddl PE=3 SV=1 - [DDL_PROMH]	9	2	1	2	6.83	40.2736	4.84326	3	0	4	2	0
B4F1J8	30S ribosomal protein S8 OS=Proteus mirabilis (strain HI4320) OX=529507 GN=rpsH PE=3 SV=1 - [RS8_PROMH]	9	4	2	4	30	14.2055	9.23193	4	0	2	3	0
B4EWD2	Sec-independent protein translocase protein TatA OS=Proteus mirabilis (strain HI4320) OX=529507 GN=tatA PE=3 SV=1 - [TATA_PROMH]	9	2	1	2	23.86	9.58497	6.72705	4	1	1	3	0
B4EY88	Uracil phosphoribosyltransferase OS=Proteus mirabilis (strain HI4320) OX=529507 GN=upp PE=3 SV=1 - [UPP_PROMH]	9	5	1	5	35.1	22.683	5.60498	2	0	7	0	0
Q9ZA87	RNase adapter protein RapZ OS=Proteus mirabilis (strain HI4320) OX=529507 GN=rapZ PE=3 SV=2 - [RAPZ_PROMH]	9	3	1	3	11.97	32.4757	6.7417	3	0	6	0	0
B4EVE8	UPF0227 protein PMI0874 OS=Proteus mirabilis (strain HI4320) OX=529507 GN=PMI0874 PE=3 SV=1 - [B4EVE8_PROMH]	9	2	2	2	11.05	21.0948	6.94678	6	0	3	0	0
B4EUX1	P-protein [includes: chorismate mutase and prephenate dehydratase] OS=Proteus mirabilis (strain HI4320) OX=529507 GN=pheA PE=4 SV=1 - [B4EUX1_PROMH]	9	3	1	3	14.81	43.0683	6.40479	4	0	5	0	0
B4F1S0	Putative isochorismatase OS=Proteus mirabilis (strain HI4320) OX=529507 GN=PMI2203 PE=4 SV=1 - [B4F1S0_PROMH]	9	3	1	3	20.44	24.2903	5.59229	1	0	8	0	0
B4EXM9	Glyoxalase OS=Proteus mirabilis (strain HI4320) OX=529507 GN=elbB PE=3 SV=1 - [B4EXM9_PROMH]	9	3	1	3	25.46	23.546	6.11279	4	0	4	1	0
B4F2W7	Xylulose kinase OS=Proteus mirabilis (strain HI4320) OX=529507 GN=xylB PE=3 SV=1 - [B4F2W7_PROMH]	9	3	1	3	9.71	53.3531	6.80029	5	0	4	0	0
B4F2U9	Threonine synthase OS=Proteus mirabilis (strain HI4320) OX=529507 GN=thrC PE=4 SV=1 - [B4F2U9_PROMH]	9	3	1	3	8.84	47.6407	6.01123	4	0	2	3	0
B4ESP6	Uncharacterized protein OS=Proteus mirabilis (strain HI4320) OX=529507 GN=PMI0556 PE=4 SV=1 - [B4ESP6_PROMH]	9	2	1	2	9.72	27.3921	6.40479	1	0	7	1	0
B4F1R8	Uncharacterized protein OS=Proteus mirabilis (strain HI4320) OX=529507 GN=PMI2201 PE=4 SV=1 - [B4F1R8_PROMH]	9	4	1	4	14.25	44.7935	5.17334	4	1	1	3	0
B4ETT3	Fumarate and nitrate reduction regulatory protein OS=Proteus mirabilis (strain HI4320) OX=529507 GN=fnr PE=4 SV=1 - [B4ETT3_PROMH]	9	3	2	3	14.68	28.2714	6.25244	1	2	2	4	0
B4EX36	Putative carbon-nitrogen hydrolase OS=Proteus mirabilis (strain HI4320) OX=529507 GN=PMI3637 PE=4 SV=1 - [B4EX36_PROMH]	9	2	1	2	9.79	32.2022	9.33447	5	0	4	0	0
B4EU56	DNA-binding protein HU-beta OS=Proteus mirabilis (strain HI4320) OX=529507 GN=hupB PE=3 SV=1 - [B4EU56_PROMH]	9	2	1	2	26.37	9.5051	9.99365	2	0	3	4	0
B4EVV2	Putative lipoprotein OS=Proteus mirabilis (strain HI4320) OX=529507 GN=PMI1165 PE=4 SV=1 - [B4EVV2_PROMH]	9	3	1	3	25.89	21.6211	8.51416	1	0	4	4	0
B4EZW3	Phosphoribosylformylglycinamidine synthase OS=Proteus mirabilis (strain HI4320) OX=529507 GN=purL PE=3 SV=1 - [B4EZW3_PROMH]	9	2	1	2	2.08	143.546	5.2749	7	0	2	0	0
B4EYT0	Putative glycerol dehydrogenase OS=Proteus mirabilis (strain HI4320) OX=529507 GN=PMI2766 PE=4 SV=1 - [B4EYT0_PROMH]	9	3	1	3	11.99	39.8692	5.07178	6	0	3	0	0
B4EWG2	Nitrite extrusion protein (MFS-family transporter) OS=Proteus mirabilis (strain HI4320) OX=529507 GN=narK PE=4 SV=1 - [B4EWG2_PROMH]	9	2	1	2	5.18	49.8873	9.42236	1	0	8	0	0
B4F0P0	Putative monooxygenase OS=Proteus mirabilis (strain HI4320) OX=529507 GN=visC PE=4 SV=1 - [B4F0P0_PROMH]	9	4	1	4	12.9	45.6845	6.62451	5	0	4	0	0
B4EUH4	Putative substrate-binding protein OS=Proteus mirabilis (strain HI4320) OX=529507 GN=PMI0238 PE=4 SV=1 - [B4EUH4_PROMH]	9	5	1	5	20	42.431	7.97217	1	0	5	3	0
B4EV83	ATP-dependent Clp protease ATP-binding subunit OS=Proteus mirabilis (strain HI4320) OX=529507 GN=clpA PE=3 SV=1 - [B4EV83_PROMH]	9	3	1	3	5.5	85.0505	6.69775	6	0	3	0	0
B4EWG4	Respiratory nitrate reductase 1 beta chain OS=Proteus mirabilis (strain HI4320) OX=529507 GN=narH PE=4 SV=1 - [B4EWG4_PROMH]	9	2	1	2	7.54	58.451	6.46826	5	0	4	0	0
F2I6A8	Signal recognition particle protein OS=Aerococcus urinae (strain ACS-120-V-Col10a) GN=ffh PE=3 SV=1 - [F2I6A8_AERUA]	9	3	1	3	8.96	54.4519	7.56201	9	0	0	0	0
F2I5K3	Isochorismatase family protein OS=Aerococcus urinae (strain ACS-120-V-Col10a) GN=HMPREF9243_0037 PE=4 SV=1 - [F2I5K3_AERUA]	9	1	1	1	6.59	20.3911	5.80811	2	7	0	0	0
F2I837	Flavocytochrome c OS=Aerococcus urinae (strain ACS-120-V-Col10a) GN=HMPREF9243_0557 PE=4 SV=1 - [F2I837_AERUA]	9	2	1	2	4.49	67.8059	4.84326	5	4	0	0	0
F2I4M2	3-hydroxyacyl-[acyl-carrier-protein] dehydratase FabZ OS=Aerococcus urinae (strain ACS-120-V-Col10a) GN=fabZ PE=3 SV=1 - [F2I4M2_AERUA]	9	1	1	1	10.53	16.8089	8.08936	8	1	0	0	0
F2I7J6	Uncharacterized protein OS=Aerococcus urinae (strain ACS-120-V-Col10a) GN=HMPREF9243_1787 PE=4 SV=1 - [F2I7J6_AERUA]	9	2	1	2	7.38	31.0421	4.29736	6	3	0	0	0
F2I6E2	Shikimate dehydrogenase (NADP(+)) OS=Aerococcus urinae (strain ACS-120-V-Col10a) GN=aroE PE=3 SV=1 - [F2I6E2_AERUA]	9	4	1	4	26.28	31.8351	5.03369	5	4	0	0	0
F2I488	Uncharacterized protein OS=Aerococcus urinae (strain ACS-120-V-Col10a) GN=HMPREF9243_0826 PE=4 SV=1 - [F2I488_AERUA]	9	1	1	1	37.5	4.68819	4.55127	5	4	0	0	0
F2I7L6	UDP-N-acetylglucosamine 1-carboxyvinyltransferase OS=Aerococcus urinae (strain ACS-120-V-Col10a) GN=murA PE=3 SV=1 - [F2I7L6_AERUA]	9	1	1	1	3.09	44.7524	5.38916	8	1	0	0	0
F2I661	Transcriptional repressor NrdR OS=Aerococcus urinae (strain ACS-120-V-Col10a) GN=nrdR PE=3 SV=1 - [F2I661_AERUA]	9	2	1	2	16.48	20.6095	5.37646	7	2	0	0	0
F2I8M0	Putative exopolyphosphatase OS=Aerococcus urinae (strain ACS-120-V-Col10a) GN=HMPREF9243_0687 PE=4 SV=1 - [F2I8M0_AERUA]	9	2	1	2	4.42	60.1365	5.37646	3	6	0	0	0
K9EZ70	GTPase Obg OS=Actinobaculum massiliense ACS-171-V-Col2 OX=883066 GN=obg PE=3 SV=1 - [K9EZ70_9ACTO]	9	4	1	3	12.45	54.1933	4.97021	1	0	0	0	8
K9EZ72	Probable nicotinate-nucleotide adenylyltransferase OS=Actinobaculum massiliense ACS-171-V-Col2 OX=883066 GN=nadD PE=3 SV=1 - [K9EZ72_9ACTO]	9	5	1	5	31.17	25.9114	6.7417	2	0	1	0	6
K9EC74	Pantothenate kinase OS=Actinobaculum massiliense ACS-171-V-Col2 OX=883066 GN=coaA PE=3 SV=1 - [K9EC74_9ACTO]	9	3	1	3	13.69	35.8085	5.89697	1	0	0	0	8
K9EX33	Acetolactate synthase OS=Actinobaculum massiliense ACS-171-V-Col2 OX=883066 GN=HMPREF9233_00314 PE=3 SV=1 - [K9EX33_9ACTO]	9	3	1	3	6.09	66.3826	5.21143	2	0	1	1	5
K9EZH2	ATP phosphoribosyltransferase OS=Actinobaculum massiliense ACS-171-V-Col2 OX=883066 GN=hisG PE=3 SV=1 - [K9EZH2_9ACTO]	9	3	1	3	17.14	30.557	5.93506	3	0	0	0	6
K9EUJ4	Phenylalanine--tRNA ligase alpha subunit OS=Actinobaculum massiliense ACS-171-V-Col2 OX=883066 GN=pheS PE=3 SV=1 - [K9EUJ4_9ACTO]	9	4	1	4	17.69	40.4818	5.03369	3	2	2	0	2
K9F289	50S ribosomal protein L31 OS=Actinobaculum massiliense ACS-171-V-Col2 OX=883066 GN=rpmE PE=3 SV=1 - [K9F289_9ACTO]	9	3	1	3	57.14	8.05891	8.77783	2	0	1	0	6
K9EEB8	Aminotransferase OS=Actinobaculum massiliense ACS-171-V-Col2 OX=883066 GN=HMPREF9233_01161 PE=3 SV=1 - [K9EEB8_9ACTO]	9	4	1	4	14.95	43.1699	5.49072	1	0	3	0	5
K9EJE0	Malto-oligosyltrehalose synthase OS=Actinobaculum massiliense ACS-171-V-Col2 OX=883066 GN=HMPREF9233_00034 PE=4 SV=1 - [K9EJE0_9ACTO]	9	6	1	6	8.91	96.0681	5.31299	1	0	0	0	8
K9EI14	Uncharacterized protein OS=Actinobaculum massiliense ACS-171-V-Col2 OX=883066 GN=HMPREF9233_00283 PE=3 SV=1 - [K9EI14_9ACTO]	9	3	1	3	21.33	23.3495	4.61475	4	0	0	0	5
K9EU84	Ribosomal silencing factor RsfS OS=Actinobaculum massiliense ACS-171-V-Col2 OX=883066 GN=rsfS PE=3 SV=1 - [K9EU84_9ACTO]	9	3	1	3	21.17	14.8407	4.90674	5	1	0	0	3
K9EXF6	Glycerate kinase OS=Actinobaculum massiliense ACS-171-V-Col2 OX=883066 GN=HMPREF9233_00459 PE=3 SV=1 - [K9EXF6_9ACTO]	9	4	1	4	13.64	38.9218	4.65283	2	0	0	0	7
K9EWU9	YidC/Oxa1 family membrane protein insertase OS=Actinobaculum massiliense ACS-171-V-Col2 OX=883066 GN=HMPREF9233_00782 PE=3 SV=1 - [K9EWU9_9ACTO]	9	2	1	2	7.77	45.0429	9.43701	1	0	1	0	7
K9EFV8	Uncharacterized protein OS=Actinobaculum massiliense ACS-171-V-Col2 OX=883066 GN=HMPREF9233_00320 PE=4 SV=1 - [K9EFV8_9ACTO]	9	5	1	5	11.54	65.4793	8.42627	1	0	0	0	8
K9F3Q1	Ribosome-binding factor A OS=Actinobaculum massiliense ACS-171-V-Col2 OX=883066 GN=rbfA PE=3 SV=1 - [K9F3Q1_9ACTO]	9	4	1	4	31.61	16.9116	5.05908	5	0	0	0	4
Q1RDS7	Asparagine--tRNA ligase OS=Escherichia coli (strain UTI89 / UPEC) GN=asnS PE=3 SV=1 - [SYN_ECOUT]	9	4	1	2	13.3	52.5374	5.31299	0	2	0	7	0
Q837J2	DEAD-box ATP-dependent RNA helicase CshA OS=Enterococcus faecalis (strain ATCC 700802 / V583) GN=cshA PE=3 SV=1 - [Q837J2_ENTFA]	9	4	1	4	9.14	59.5785	9.64209	0	1	7	1	0
P37710	Autolysin OS=Enterococcus faecalis (strain ATCC 700802 / V583) GN=EF_0799 PE=1 SV=2 - [ALYS_ENTFA]	9	3	1	3	10.58	76.9784	9.30518	0	0	9	0	0
Q82ZT7	D-ribose pyranase OS=Enterococcus faecalis (strain ATCC 700802 / V583) GN=rbsD PE=3 SV=1 - [RBSD_ENTFA]	9	3	1	3	25.19	14.6765	5.08447	0	0	9	0	0
Q831F6	Peptide chain release factor 1 OS=Enterococcus faecalis (strain ATCC 700802 / V583) GN=prfA PE=3 SV=1 - [RF1_ENTFA]	9	5	1	5	17.37	40.2223	4.93213	0	0	9	0	0
Q836E3	50S ribosomal protein L31 type B OS=Enterococcus faecalis (strain ATCC 700802 / V583) GN=rpmE2 PE=3 SV=1 - [RL31B_ENTFA]	9	3	1	3	58.43	10.1189	5.89697	0	0	9	0	0
Q839Z0	30S ribosomal protein S6 OS=Enterococcus faecalis (strain ATCC 700802 / V583) GN=rpsF PE=3 SV=1 - [RS6_ENTFA]	9	2	1	2	39	11.5979	5.12256	0	0	8	1	0
Q833I2	Aspartate--tRNA ligase OS=Enterococcus faecalis (strain ATCC 700802 / V583) GN=aspS PE=3 SV=1 - [SYD_ENTFA]	9	4	1	4	9.68	66.6328	5.021	0	0	9	0	0
Q82YI1	ParA family protein OS=Enterococcus faecalis (strain ATCC 700802 / V583) GN=EF_B0064 PE=4 SV=1 - [Q82YI1_ENTFA]	9	3	1	3	18.46	28.8888	4.70361	0	0	5	4	0
Q830N4	Peptidase, M42 family OS=Enterococcus faecalis (strain ATCC 700802 / V583) GN=EF_2744 PE=3 SV=1 - [Q830N4_ENTFA]	9	3	1	3	12.46	38.7428	6.06201	0	0	9	0	0
Q831Y8	Uncharacterized protein OS=Enterococcus faecalis (strain ATCC 700802 / V583) GN=EF_2354 PE=1 SV=1 - [Q831Y8_ENTFA]	9	3	1	3	24.53	17.5391	4.67822	0	0	9	0	0
Q834E8	Glycosyl hydrolase, family 38 OS=Enterococcus faecalis (strain ATCC 700802 / V583) GN=EF_1707 PE=1 SV=1 - [Q834E8_ENTFA]	9	4	1	4	7.59	102.18	4.99561	0	0	8	1	0
Q832J2	Sugar ABC transporter, sugar-binding protein, putative OS=Enterococcus faecalis (strain ATCC 700802 / V583) GN=EF_2234 PE=4 SV=1 - [Q832J2_ENTFA]	9	4	1	4	12.24	47.8406	5.09717	0	0	7	2	0
Q831S6	Pyrroline-5-carboxylate reductase OS=Enterococcus faecalis (strain ATCC 700802 / V583) GN=proC PE=3 SV=1 - [Q831S6_ENTFA]	9	3	1	3	21.54	27.3674	5.8208	0	0	8	1	0
Q837A9	Hydrolase, TatD family OS=Enterococcus faecalis (strain ATCC 700802 / V583) GN=EF_0934 PE=4 SV=1 - [Q837A9_ENTFA]	9	4	1	4	28.91	29.452	5.03369	0	0	9	0	0
Q837D2	Peptide ABC transporter, ATP-binding protein OS=Enterococcus faecalis (strain ATCC 700802 / V583) GN=EF_0911 PE=3 SV=1 - [Q837D2_ENTFA]	9	4	3	3	15.06	38.8294	6.34131	0	0	7	0	2
B4F2I0	Chaperone SurA OS=Proteus mirabilis (strain HI4320) OX=529507 GN=surA PE=3 SV=1 - [B4F2I0_PROMH]	9	5	1	5	19.5	48.466	5.70654	0	0	9	0	0
B4F158	Probable short chain dehydrogenase OS=Proteus mirabilis (strain HI4320) OX=529507 GN=PMI3202 PE=4 SV=1 - [B4F158_PROMH]	9	2	1	2	14.74	26.5585	5.38916	0	0	7	2	0
B4EZ18	Phage protein OS=Proteus mirabilis (strain HI4320) OX=529507 GN=PMI1721 PE=4 SV=1 - [B4EZ18_PROMH]	9	5	1	5	18.99	53.699	4.98291	0	0	4	5	0
B4EZE7	Putative NUDIX hydrolase OS=Proteus mirabilis (strain HI4320) OX=529507 GN=PMI1779 PE=4 SV=1 - [B4EZE7_PROMH]	9	2	1	2	19.44	20.4549	4.61475	0	0	9	0	0
B4EZK0	Putative amino acid ABC transporter, substrate-binding protein OS=Proteus mirabilis (strain HI4320) OX=529507 GN=PMI2898 PE=4 SV=1 - [B4EZK0_PROMH]	9	6	1	6	29.75	30.5994	8.63135	0	0	9	0	0
Q1R3X0	Catalase-peroxidase OS=Escherichia coli (strain UTI89 / UPEC) GN=katG PE=3 SV=2 - [KATG_ECOUT]	9	2	1	2	4.13	79.9491	5.31299	0	0	0	9	0
Q1R528	Xylose import ATP-binding protein XylG OS=Escherichia coli (strain UTI89 / UPEC) GN=xylG PE=3 SV=2 - [XYLG_ECOUT]	9	1	1	1	3.12	56.3947	6.18896	0	0	0	9	0
Q1RCL7	Uncharacterized protein OS=Escherichia coli (strain UTI89 / UPEC) GN=ychN PE=4 SV=1 - [Q1RCL7_ECOUT]	9	4	1	4	73.5	12.7117	5.10986	0	0	0	9	0
Q1RD45	NADH dehydrogenase OS=Escherichia coli (strain UTI89 / UPEC) GN=ndh PE=4 SV=1 - [Q1RD45_ECOUT]	9	3	1	3	8.35	48.2882	9.05615	0	0	0	9	0
Q1REX6	Enterobactin synthetase component F OS=Escherichia coli (strain UTI89 / UPEC) GN=entF PE=4 SV=1 - [Q1REX6_ECOUT]	9	3	1	3	2.63	141.797	5.23682	0	0	0	9	0
K9EU65	50S ribosomal protein L28 OS=Actinobaculum massiliense ACS-171-V-Col2 OX=883066 GN=rpmB PE=3 SV=1 - [K9EU65_9ACTO]	9	4	1	4	39.68	6.91169	11.5757	0	0	0	1	8
K9EVT5	Uncharacterized protein OS=Actinobaculum massiliense ACS-171-V-Col2 OX=883066 GN=HMPREF9233_00858 PE=4 SV=1 - [K9EVT5_9ACTO]	9	3	1	3	7.8	52.418	9.05615	0	0	0	0	9
K9ECQ6	Maf-like protein HMPREF9233_01192 OS=Actinobaculum massiliense ACS-171-V-Col2 OX=883066 GN=HMPREF9233_01192 PE=3 SV=1 - [K9ECQ6_9ACTO]	9	3	1	3	11.72	44.7304	5.87158	0	0	0	0	9
K9F3D9	DNA topoisomerase (ATP-hydrolyzing) OS=Actinobaculum massiliense ACS-171-V-Col2 OX=883066 GN=HMPREF9233_00048 PE=3 SV=1 - [K9F3D9_9ACTO]	9	3	1	3	6.22	89.4349	5.88428	0	0	0	0	9
K9EX38	Uncharacterized protein OS=Actinobaculum massiliense ACS-171-V-Col2 OX=883066 GN=HMPREF9233_00319 PE=4 SV=1 - [K9EX38_9ACTO]	9	7	1	7	17.28	63.1976	8.54346	0	0	0	0	9
Q1R804	Alanine--tRNA ligase OS=Escherichia coli (strain UTI89 / UPEC) GN=alaS PE=3 SV=1 - [SYA_ECOUT]	8	4	1	4	5.71	95.8736	5.80811	5	0	0	3	0
Q1RCS2	Site-determining protein OS=Escherichia coli (strain UTI89 / UPEC) GN=minD PE=3 SV=1 - [Q1RCS2_ECOUT]	8	3	1	2	14.81	29.5956	5.37646	1	0	0	7	0
Q1R9I5	DNA gyrase subunit A OS=Escherichia coli (strain UTI89 / UPEC) GN=gyrA PE=3 SV=1 - [Q1R9I5_ECOUT]	8	1	1	1	1.26	96.9334	5.19873	8	0	0	0	0
Q1R8R7	NADP-dependent malate dehydrogenase OS=Escherichia coli (strain UTI89 / UPEC) GN=maeB PE=4 SV=1 - [Q1R8R7_ECOUT]	8	4	1	2	6.32	82.3908	5.50342	2	0	0	6	0
Q1RAX3	PTS enzyme IIC, mannose-specific OS=Escherichia coli (strain UTI89 / UPEC) GN=manY PE=4 SV=1 - [Q1RAX3_ECOUT]	8	1	1	1	4.51	27.6177	5.14795	2	0	0	6	0
Q1REY6	Oxygen-insensitive NAD(P)H nitroreductase OS=Escherichia coli (strain UTI89 / UPEC) GN=nfnB PE=4 SV=1 - [Q1REY6_ECOUT]	8	1	1	1	5.07	23.9782	5.80811	3	3	0	2	0
Q1R262	Deoxyribose-phosphate aldolase OS=Escherichia coli (strain UTI89 / UPEC) GN=deoC PE=3 SV=1 - [Q1R262_ECOUT]	8	4	1	3	19.48	28.6327	5.42725	1	0	0	7	0
Q1REG7	Molybdate-binding periplasmic protein OS=Escherichia coli (strain UTI89 / UPEC) GN=modA PE=4 SV=1 - [Q1REG7_ECOUT]	8	1	1	1	5.45	27.3972	7.47412	2	3	0	3	0
Q1R344	Peptidyl-prolyl cis-trans isomerase OS=Escherichia coli (strain UTI89 / UPEC) GN=fklB PE=3 SV=1 - [Q1R344_ECOUT]	8	4	1	4	19.31	28.2037	5.21143	1	3	0	4	0
Q830C3	Probable transcriptional regulatory protein EF_2866 OS=Enterococcus faecalis (strain ATCC 700802 / V583) GN=EF_2866 PE=3 SV=1 - [Y2866_ENTFA]	8	2	1	2	10.04	26.6372	4.7417	1	0	7	0	0
Q82Z29	Uncharacterized protein OS=Enterococcus faecalis (strain ATCC 700802 / V583) GN=EF_3250 PE=4 SV=1 - [Q82Z29_ENTFA]	8	1	1	1	2.79	69.947	5.30029	4	3	1	0	0
B4EXU3	Fatty acid metabolism regulator protein OS=Proteus mirabilis (strain HI4320) OX=529507 GN=fadR PE=3 SV=1 - [FADR_PROMH]	8	1	1	1	5.02	27.2072	6.40479	3	0	5	0	0
B4EWC2	5-methyltetrahydropteroyltriglutamate--homocysteine methyltransferase OS=Proteus mirabilis (strain HI4320) OX=529507 GN=metE PE=3 SV=1 - [METE_PROMH]	8	2	1	2	3.04	85.359	5.8335	3	0	4	1	0
B4F2C0	Ribosome-binding factor A OS=Proteus mirabilis (strain HI4320) OX=529507 GN=rbfA PE=3 SV=1 - [RBFA_PROMH]	8	2	1	2	17.29	15.0407	5.40186	3	1	2	2	0
B4EU30	D-ribose pyranase OS=Proteus mirabilis (strain HI4320) OX=529507 GN=rbsD PE=3 SV=1 - [RBSD_PROMH]	8	3	1	3	30.22	15.4793	6.15088	5	0	3	0	0
B4EZ95	Glycine--tRNA ligase beta subunit OS=Proteus mirabilis (strain HI4320) OX=529507 GN=glyS PE=3 SV=1 - [SYGB_PROMH]	8	2	1	2	5.07	76.8691	5.42725	8	0	0	0	0
P17086	Urease subunit alpha OS=Proteus mirabilis (strain HI4320) OX=529507 GN=ureC PE=1 SV=2 - [URE1_PROMH]	8	3	1	3	8.29	60.8879	5.74463	1	0	7	0	0
P17087	Urease subunit beta OS=Proteus mirabilis (strain HI4320) OX=529507 GN=ureB PE=1 SV=2 - [URE2_PROMH]	8	2	1	2	22.22	12.0463	9.40771	1	0	5	2	0
B4EVE3	Putative nucleotide-binding protein OS=Proteus mirabilis (strain HI4320) OX=529507 GN=PMI0869 PE=4 SV=1 - [B4EVE3_PROMH]	8	1	1	1	21.55	12.7387	5.97314	7	0	1	0	0
B4EX49	Probable ATP-binding component of cysteine desulfurase (Putative ATP-dependent transporter) OS=Proteus mirabilis (strain HI4320) OX=529507 GN=sufC PE=4 SV=1 - [B4EX49_PROMH]	8	5	1	5	22.98	27.7652	4.76709	1	0	4	3	0
B4EZT4	Cytoskeleton protein RodZ OS=Proteus mirabilis (strain HI4320) OX=529507 GN=PMI1846 PE=3 SV=1 - [B4EZT4_PROMH]	8	3	1	3	13.44	34.891	5.79541	1	0	7	0	0
B4F1W0	UDP-N-acetyl-D-mannosamine dehydrogenase OS=Proteus mirabilis (strain HI4320) OX=529507 GN=rffD PE=3 SV=1 - [B4F1W0_PROMH]	8	5	1	5	16.19	46.2299	5.94775	3	0	5	0	0
B4ET68	Curved DNA-binding protein OS=Proteus mirabilis (strain HI4320) OX=529507 GN=cbpA PE=4 SV=1 - [B4ET68_PROMH]	8	3	1	3	14.01	35.8825	7.35693	3	0	5	0	0
B4EVD0	Putative lipoprotein protein OS=Proteus mirabilis (strain HI4320) OX=529507 GN=PMI0778 PE=4 SV=1 - [B4EVD0_PROMH]	8	2	1	2	15.26	21.26	6.11279	2	0	6	0	0
B4F2E5	Putative amino acid decarboxylase OS=Proteus mirabilis (strain HI4320) OX=529507 GN=PMI2297 PE=4 SV=1 - [B4F2E5_PROMH]	8	3	1	3	8.57	50.7361	6.29053	3	0	3	2	0
B4EZX9	Uncharacterized protein OS=Proteus mirabilis (strain HI4320) OX=529507 GN=PMI2968 PE=4 SV=1 - [B4EZX9_PROMH]	8	3	1	3	17.22	31.0964	6.7124	1	0	2	5	0
F2I5W1	ABC transporter, permease protein OS=Aerococcus urinae (strain ACS-120-V-Col10a) GN=HMPREF9243_1448 PE=3 SV=1 - [F2I5W1_AERUA]	8	3	1	3	7.85	59.7065	4.729	6	2	0	0	0
F2I5W0	ABC transporter, ATP-binding protein OS=Aerococcus urinae (strain ACS-120-V-Col10a) GN=HMPREF9243_1447 PE=4 SV=1 - [F2I5W0_AERUA]	8	3	1	3	17.81	27.5401	6.41748	6	2	0	0	0
F2I6H5	Tagatose-bisphosphate aldolase OS=Aerococcus urinae (strain ACS-120-V-Col10a) GN=gatY PE=3 SV=1 - [F2I6H5_AERUA]	8	3	1	3	20.64	30.8007	5.08447	5	3	0	0	0
F2I6M0	Inositol-1-monophosphatase OS=Aerococcus urinae (strain ACS-120-V-Col10a) GN=HMPREF9243_1590 PE=3 SV=1 - [F2I6M0_AERUA]	8	3	1	3	14.02	29.272	4.95752	5	3	0	0	0
F2I907	Lipoprotein OS=Aerococcus urinae (strain ACS-120-V-Col10a) GN=HMPREF9243_0762 PE=3 SV=1 - [F2I907_AERUA]	8	1	1	1	9.32	30.4513	4.51318	8	0	0	0	0
F2I8W7	Deoxyribose-phosphate aldolase OS=Aerococcus urinae (strain ACS-120-V-Col10a) GN=deoC PE=3 SV=1 - [F2I8W7_AERUA]	8	1	1	1	6.22	24.8878	5.66846	4	4	0	0	0
F2I7J3	Phosphate import ATP-binding protein PstB OS=Aerococcus urinae (strain ACS-120-V-Col10a) GN=pstB PE=3 SV=1 - [F2I7J3_AERUA]	8	5	1	5	29.59	29.874	4.86865	6	2	0	0	0
F2I8J6	Phenylalanine--tRNA ligase beta subunit OS=Aerococcus urinae (strain ACS-120-V-Col10a) GN=HMPREF9243_0657 PE=3 SV=1 - [F2I8J6_AERUA]	8	1	1	1	15.82	19.4797	4.65283	6	2	0	0	0
F2I4P8	Phosphotransferase system, EIIC OS=Aerococcus urinae (strain ACS-120-V-Col10a) GN=HMPREF9243_1015 PE=4 SV=1 - [F2I4P8_AERUA]	8	3	1	3	15.7	37.5824	4.83057	1	7	0	0	0
F2I6R4	Uncharacterized protein OS=Aerococcus urinae (strain ACS-120-V-Col10a) GN=HMPREF9243_1637 PE=4 SV=1 - [F2I6R4_AERUA]	8	2	1	2	19.23	21.9308	4.98291	8	0	0	0	0
F2I5L5	Transcriptional regulator, LysR family OS=Aerococcus urinae (strain ACS-120-V-Col10a) GN=HMPREF9243_0055 PE=4 SV=1 - [F2I5L5_AERUA]	8	2	1	2	9.63	34.7203	4.94482	7	1	0	0	0
F2I5Y0	Fumarate reductase flavoprotein subunit OS=Aerococcus urinae (strain ACS-120-V-Col10a) GN=HMPREF9243_0102 PE=4 SV=1 - [F2I5Y0_AERUA]	8	2	1	2	6.24	47.339	4.94482	6	2	0	0	0
F2I714	Glycosyltransferase, group 2 family protein OS=Aerococcus urinae (strain ACS-120-V-Col10a) GN=HMPREF9243_1662 PE=4 SV=1 - [F2I714_AERUA]	8	1	1	1	5.54	31.5062	8.71924	4	4	0	0	0
F2I6B6	Luciferase family oxidoreductase, FMN-dependent, PP_0088 family OS=Aerococcus urinae (strain ACS-120-V-Col10a) GN=HMPREF9243_1553 PE=4 SV=1 - [F2I6B6_AERUA]	8	3	1	3	9.2	38.7554	5.68115	3	5	0	0	0
F2I4Q0	Histidine--tRNA ligase OS=Aerococcus urinae (strain ACS-120-V-Col10a) GN=hisS PE=3 SV=1 - [F2I4Q0_AERUA]	8	2	1	2	6.71	49.2201	5.08447	3	5	0	0	0
K9EG73	Pantothenate synthetase OS=Actinobaculum massiliense ACS-171-V-Col2 OX=883066 GN=panC PE=3 SV=1 - [K9EG73_9ACTO]	8	4	1	4	15.5	29.5141	4.79248	2	0	0	0	6
K9ECU0	Uncharacterized protein OS=Actinobaculum massiliense ACS-171-V-Col2 OX=883066 GN=HMPREF9233_01435 PE=4 SV=1 - [K9ECU0_9ACTO]	8	2	1	2	12.45	28.603	5.03369	2	0	0	0	6
K9EU49	Glutamate racemase OS=Actinobaculum massiliense ACS-171-V-Col2 OX=883066 GN=murI PE=3 SV=1 - [K9EU49_9ACTO]	8	2	1	2	10.74	28.4526	4.93213	4	0	1	0	3
K9EEE0	Peptide chain release factor 1 OS=Actinobaculum massiliense ACS-171-V-Col2 OX=883066 GN=prfA PE=3 SV=1 - [K9EEE0_9ACTO]	8	5	1	4	20.92	41.1925	4.86865	2	0	0	0	6
K9EDX0	YjeE family ATPase OS=Actinobaculum massiliense ACS-171-V-Col2 OX=883066 GN=HMPREF9233_01312 PE=4 SV=1 - [K9EDX0_9ACTO]	8	4	1	3	28.33	19.6409	4.62744	1	0	0	0	7
K9EGH0	Uncharacterized protein OS=Actinobaculum massiliense ACS-171-V-Col2 OX=883066 GN=HMPREF9233_01099 PE=4 SV=1 - [K9EGH0_9ACTO]	8	1	1	1	2.14	53.4599	4.91943	8	0	0	0	0
K9EEI9	Uncharacterized protein OS=Actinobaculum massiliense ACS-171-V-Col2 OX=883066 GN=HMPREF9233_00859 PE=4 SV=1 - [K9EEI9_9ACTO]	8	5	1	5	19.24	35.9703	5.09717	2	0	0	0	6
K9EB92	HAD hydrolase, family IIB OS=Actinobaculum massiliense ACS-171-V-Col2 OX=883066 GN=HMPREF9233_01486 PE=4 SV=1 - [K9EB92_9ACTO]	8	4	1	4	21.4	28.2384	4.91943	1	0	0	0	7
K9EEK5	Gluconate:H+ symporter (GntP) family transporter OS=Actinobaculum massiliense ACS-171-V-Col2 OX=883066 GN=HMPREF9233_00456 PE=4 SV=1 - [K9EEK5_9ACTO]	8	2	1	2	5.56	47.2828	8.52881	4	4	0	0	0
K9EFZ7	Uncharacterized protein OS=Actinobaculum massiliense ACS-171-V-Col2 OX=883066 GN=HMPREF9233_01245 PE=4 SV=1 - [K9EFZ7_9ACTO]	8	3	1	3	10.03	38.8715	5.31299	2	1	0	0	5
K9EE18	Pyruvate formate-lyase-activating enzyme OS=Actinobaculum massiliense ACS-171-V-Col2 OX=883066 GN=HMPREF9233_01342 PE=3 SV=1 - [K9EE18_9ACTO]	8	6	1	6	29.53	33.5159	5.60498	1	0	0	0	7
K9EFC6	Uncharacterized protein OS=Actinobaculum massiliense ACS-171-V-Col2 OX=883066 GN=HMPREF9233_00703 PE=4 SV=1 - [K9EFC6_9ACTO]	8	5	1	5	24.11	31.0042	4.88135	1	0	0	0	7
K9EX84	Uncharacterized protein OS=Actinobaculum massiliense ACS-171-V-Col2 OX=883066 GN=HMPREF9233_00374 PE=4 SV=1 - [K9EX84_9ACTO]	8	1	1	1	9.04	21.3071	7.12256	1	0	0	0	7
K9EHA6	Uncharacterized protein OS=Actinobaculum massiliense ACS-171-V-Col2 OX=883066 GN=HMPREF9233_00126 PE=4 SV=1 - [K9EHA6_9ACTO]	8	2	1	2	33.33	8.03026	4.71631	1	0	0	0	7
K9ED86	3-dehydroquinate synthase OS=Actinobaculum massiliense ACS-171-V-Col2 OX=883066 GN=HMPREF9233_00980 PE=3 SV=1 - [K9ED86_9ACTO]	8	6	1	6	24.54	40.4099	6.12549	2	0	0	0	6
Q1RBL9	Starvation sensing protein RspB OS=Escherichia coli (strain UTI89 / UPEC) GN=rspB PE=3 SV=1 - [Q1RBL9_ECOUT]	8	2	1	2	9.51	37.4295	6.52197	0	8	0	0	0
Q834M0	Microcompartment protein family OS=Enterococcus faecalis (strain ATCC 700802 / V583) GN=EF_1625 PE=4 SV=1 - [Q834M0_ENTFA]	8	2	1	2	15.7	18.7628	4.67822	0	5	3	0	0
B4F0A1	Putative exported protein OS=Proteus mirabilis (strain HI4320) OX=529507 GN=PMI1944 PE=4 SV=1 - [B4F0A1_PROMH]	8	3	1	3	16.49	32.3623	6.87354	0	2	6	0	0
F2I487	Uncharacterized protein OS=Aerococcus urinae (strain ACS-120-V-Col10a) GN=HMPREF9243_0825 PE=4 SV=1 - [F2I487_AERUA]	8	1	1	1	4.06	40.4729	7.32764	0	8	0	0	0
[truncated: 2,081 more rows]

## Sheet: All A. mass proteins_normalized
Accession	Description	Σ# PSMs	Σ# Peptides	Σ# Proteins	Σ# Unique Peptides	ΣCoverage	MW [kDa]	calc. pI	CB27	CB37	CB5	CB17	SD_#6	norm CB27	norm CB37	norm CB5	norm CB17	norm SD_#6	Average CB	Quotient CB/ivt
K9EVG4	Uncharacterized protein (Fragment) OS=Actinobaculum massiliense ACS-171-V-Col2 OX=883066 GN=HMPREF9233_01095 PE=3 SV=1 - [K9EVG4_9ACTO]	1000	38	1	38	33.53	191.97	4.55127	212	208	295	277	8	0.0161168	0.0354525	0.0602779	0.135122	0.00026721	0.0617423	231.063
K9EHZ4	Uncharacterized protein (Fragment) OS=Actinobaculum massiliense ACS-171-V-Col2 OX=883066 GN=HMPREF9233_00826 PE=4 SV=1 - [K9EHZ4_9ACTO]	899	35	1	35	62.24	96.6908	5.14795	257	210	164	174	94	0.0195378	0.0357934	0.0335104	0.084878	0.00313972	0.0434299	13.8324
K9EFC3	Glyceraldehyde-3-phosphate dehydrogenase OS=Actinobaculum massiliense ACS-171-V-Col2 OX=883066 GN=HMPREF9233_01543 PE=3 SV=1 - [K9EFC3_9ACTO]	2517	20	1	19	77.45	36.5169	5.40186	682	371	94	64	1306	0.0518473	0.063235	0.0192072	0.0312195	0.043622	0.0413773	0.948541
K9F1W5	Uncharacterized protein OS=Actinobaculum massiliense ACS-171-V-Col2 OX=883066 GN=HMPREF9233_00810 PE=3 SV=1 - [K9F1W5_9ACTO]	1267	53	1	53	50.97	200.04	4.66553	202	193	227	139	506	0.0153565	0.0328959	0.0463833	0.0678049	0.016901	0.0406102	2.40282
K9F007	Elongation factor Tu OS=Actinobaculum massiliense ACS-171-V-Col2 OX=883066 GN=tuf PE=3 SV=1 - [K9F007_9ACTO]	1737	18	1	16	67.93	43.811	5.05908	338	258	149	113	879	0.0256956	0.0439748	0.0304454	0.055122	0.0293597	0.0388094	1.32186
K9EVP0	Uncharacterized protein OS=Actinobaculum massiliense ACS-171-V-Col2 OX=883066 GN=HMPREF9233_01185 PE=4 SV=1 - [K9EVP0_9ACTO]	727	12	1	12	35.45	63.7386	4.58936	250	163	114	45	155	0.0190056	0.0277825	0.0232938	0.0219512	0.00517719	0.0230083	4.44416
K9EDB6	Uncharacterized protein OS=Actinobaculum massiliense ACS-171-V-Col2 OX=883066 GN=HMPREF9233_01650 PE=4 SV=1 - [K9EDB6_9ACTO]	671	16	1	16	70.13	43.4013	5.05908	296	278	21	9	67	0.0225027	0.0473837	0.00429097	0.00439024	0.00223788	0.0196419	8.77699
K9EDQ2	50S ribosomal protein L7/L12 OS=Actinobaculum massiliense ACS-171-V-Col2 OX=883066 GN=rplL PE=3 SV=1 - [K9EDQ2_9ACTO]	798	9	1	9	89.06	13.0658	4.44971	196	147	80	44	331	0.0149004	0.0250554	0.0163465	0.0214634	0.0110558	0.0194414	1.75848
K9EDH9	60 kDa chaperonin OS=Actinobaculum massiliense ACS-171-V-Col2 OX=883066 GN=groL PE=3 SV=1 - [K9EDH9_9ACTO]	854	28	1	27	69.44	56.9269	4.86865	188	71	51	69	475	0.0142922	0.0121016	0.0104209	0.0336585	0.0158656	0.0176183	1.11047
K9ECK4	Enolase OS=Actinobaculum massiliense ACS-171-V-Col2 OX=883066 GN=eno PE=3 SV=1 - [K9ECK4_9ACTO]	1187	16	1	16	63.62	45.4067	4.66553	338	129	46	27	647	0.0256956	0.0219874	0.00939926	0.0131707	0.0216106	0.0175632	0.812714
K9EX04	Aminopeptidase N OS=Actinobaculum massiliense ACS-171-V-Col2 OX=883066 GN=HMPREF9233_00274 PE=4 SV=1 - [K9EX04_9ACTO]	598	35	1	35	55.75	94.4469	4.64014	180	77	132	10	199	0.0136841	0.0131243	0.0269718	0.00487805	0.00664685	0.0146645	2.20624
K9EUF0	Mannonate dehydratase OS=Actinobaculum massiliense ACS-171-V-Col2 OX=883066 GN=uxuA PE=3 SV=1 - [K9EUF0_9ACTO]	484	17	1	17	76.55	42.206	5.03369	107	58	83	42	194	0.00813441	0.0098858	0.0169595	0.0204878	0.00647984	0.0138669	2.14
K9EUD5	Phosphoglycerate kinase OS=Actinobaculum massiliense ACS-171-V-Col2 OX=883066 GN=pgk PE=3 SV=1 - [K9EUD5_9ACTO]	926	18	1	18	62.72	41.9516	4.70361	266	136	38	0	486	0.020222	0.0231805	0.00776461	0	0.016233	0.0127918	0.78801
K9EC31	Elongation factor G OS=Actinobaculum massiliense ACS-171-V-Col2 OX=883066 GN=fusA PE=3 SV=1 - [K9EC31_9ACTO]	643	29	1	28	67.46	78.0466	5.05908	170	98	65	15	295	0.0129238	0.0167036	0.0132816	0.00731707	0.00985337	0.0125565	1.27434
K9EF57	Uncharacterized protein OS=Actinobaculum massiliense ACS-171-V-Col2 OX=883066 GN=HMPREF9233_01453 PE=3 SV=1 - [K9EF57_9ACTO]	759	15	1	15	74.63	35.8602	5.13525	190	153	24	9	383	0.0144443	0.0260781	0.00490396	0.00439024	0.0127927	0.0124541	0.973536
K9ED12	Xylose isomerase OS=Actinobaculum massiliense ACS-171-V-Col2 OX=883066 GN=xylA PE=3 SV=1 - [K9ED12_9ACTO]	350	19	1	19	58.13	50.5879	4.89404	179	85	61	17	8	0.013608	0.0144878	0.0124642	0.00829268	0.00026721	0.0122132	45.7063
K9EIK4	Chaperone protein DnaK OS=Actinobaculum massiliense ACS-171-V-Col2 OX=883066 GN=dnaK PE=2 SV=1 - [K9EIK4_9ACTO]	363	24	1	24	58.64	65.8075	4.7417	92	27	90	38	116	0.00699407	0.00460201	0.0183899	0.0185366	0.00387454	0.0121306	3.13085
K9EG07	ATP synthase subunit beta OS=Actinobaculum massiliense ACS-171-V-Col2 OX=883066 GN=atpD PE=3 SV=1 - [K9EG07_9ACTO]	513	23	1	22	75.93	52.8198	4.66553	157	77	44	18	217	0.0119355	0.0131243	0.0089906	0.00878049	0.00724807	0.0107077	1.47732
K9EU42	Uncharacterized protein OS=Actinobaculum massiliense ACS-171-V-Col2 OX=883066 GN=HMPREF9233_01424 PE=3 SV=1 - [K9EU42_9ACTO]	303	5	2	4	56.99	9.89231	9.40771	103	57	43	33	67	0.00783032	0.00971536	0.00878627	0.0160976	0.00223788	0.0106074	4.73991
K9EZB7	Pyruvate kinase OS=Actinobaculum massiliense ACS-171-V-Col2 OX=883066 GN=HMPREF9233_01527 PE=3 SV=1 - [K9EZB7_9ACTO]	552	21	1	21	69.83	51.1157	5.50342	211	76	14	20	231	0.0160407	0.0129538	0.00286065	0.0097561	0.00771569	0.0104028	1.34827
K9ED17	30S ribosomal protein S1 OS=Actinobaculum massiliense ACS-171-V-Col2 OX=883066 GN=HMPREF9233_01530 PE=4 SV=1 - [K9ED17_9ACTO]	379	21	1	21	58.75	54.8749	4.70361	117	73	46	22	121	0.00889463	0.0124425	0.00939926	0.0107317	0.00404155	0.010367	2.56511
K9EE63	Uncharacterized protein OS=Actinobaculum massiliense ACS-171-V-Col2 OX=883066 GN=HMPREF9233_01096 PE=4 SV=1 - [K9EE63_9ACTO]	378	21	1	21	64.79	50.8945	4.81787	87	25	78	29	159	0.00661396	0.00426112	0.0159379	0.0141463	0.0053108	0.0102398	1.92811
K9EDN9	Rib/alpha/Esp surface antigen (Fragment) OS=Actinobaculum massiliense ACS-171-V-Col2 OX=883066 GN=HMPREF9233_00827 PE=4 SV=1 - [K9EDN9_9ACTO]	200	7	1	7	41.54	33.536	4.29736	40	9	20	58	73	0.0030409	0.001534	0.00408664	0.0282927	0.00243829	0.00923856	3.78895
K9EFJ8	Uronate isomerase OS=Actinobaculum massiliense ACS-171-V-Col2 OX=883066 GN=HMPREF9233_01623 PE=3 SV=1 - [K9EFJ8_9ACTO]	274	17	1	17	50.74	54.1458	5.37646	82	23	79	17	73	0.00623385	0.00392023	0.0161422	0.00829268	0.00243829	0.00864724	3.54644
K9EZE1	Transketolase OS=Actinobaculum massiliense ACS-171-V-Col2 OX=883066 GN=HMPREF9233_01552 PE=3 SV=1 - [K9EZE1_9ACTO]	326	23	1	23	48.84	74.2924	5.07178	75	49	59	10	133	0.00570169	0.0083518	0.0120556	0.00487805	0.00444237	0.00774678	1.74384
K9EFE0	Uncharacterized protein OS=Actinobaculum massiliense ACS-171-V-Col2 OX=883066 GN=HMPREF9233_01563 PE=4 SV=1 - [K9EFE0_9ACTO]	369	26	1	26	72.47	59.6994	4.69092	145	48	19	16	141	0.0110233	0.00818135	0.0038823	0.00780488	0.00470958	0.00772295	1.63984
K9EHA7	2,3-bisphosphoglycerate-dependent phosphoglycerate mutase OS=Actinobaculum massiliense ACS-171-V-Col2 OX=883066 GN=gpmA PE=3 SV=1 - [K9EHA7_9ACTO]	429	13	1	12	71.84	27.8623	5.8335	101	49	26	15	238	0.00767827	0.0083518	0.00531263	0.00731707	0.0079495	0.00716494	0.901308
K9EXC4	Excisionase family DNA binding domain-containing protein OS=Actinobaculum massiliense ACS-171-V-Col2 OX=883066 GN=HMPREF9233_00424 PE=4 SV=1 - [K9EXC4_9ACTO]	124	3	1	3	64.38	8.08209	5.0083	30	6	19	44	25	0.00228068	0.00102267	0.0038823	0.0214634	0.000835031	0.00716227	8.57724
K9EDR2	30S ribosomal protein S7 OS=Actinobaculum massiliense ACS-171-V-Col2 OX=883066 GN=rpsG PE=3 SV=1 - [K9EDR2_9ACTO]	253	6	1	6	60.9	17.5134	10.0815	67	57	33	6	90	0.00509351	0.00971536	0.00674295	0.00292683	0.00300611	0.00611966	2.03574
K9EG24	DNA-directed RNA polymerase subunit beta' OS=Actinobaculum massiliense ACS-171-V-Col2 OX=883066 GN=rpoC PE=3 SV=1 - [K9EG24_9ACTO]	349	55	1	52	52.88	148.434	5.75732	113	28	18	14	176	0.00859054	0.00477246	0.00367797	0.00682927	0.00587862	0.00596756	1.01513
K9EE92	Transaldolase OS=Actinobaculum massiliense ACS-171-V-Col2 OX=883066 GN=tal PE=3 SV=1 - [K9EE92_9ACTO]	261	18	1	18	75.54	40.1464	4.65283	66	22	40	14	119	0.00501749	0.00374979	0.00817327	0.00682927	0.00397475	0.00594245	1.49505
K9F147	Probable D-serine dehydratase OS=Actinobaculum massiliense ACS-171-V-Col2 OX=883066 GN=dsdA PE=3 SV=1 - [K9F147_9ACTO]	166	11	1	11	38.67	49.1655	5.14795	49	21	41	16	39	0.0037251	0.00357934	0.00837761	0.00780488	0.00130265	0.00587173	4.50753
K9EGH5	Uncharacterized protein OS=Actinobaculum massiliense ACS-171-V-Col2 OX=883066 GN=HMPREF9233_00550 PE=4 SV=1 - [K9EGH5_9ACTO]	121	2	1	2	27.27	14.7555	5.0083	26	18	14	30	33	0.00197659	0.00306801	0.00286065	0.0146341	0.00110224	0.00563485	5.11217
K9EGC0	Formate acetyltransferase OS=Actinobaculum massiliense ACS-171-V-Col2 OX=883066 GN=HMPREF9233_01340 PE=4 SV=1 - [K9EGC0_9ACTO]	453	25	1	24	61.77	77.9927	5.05908	86	38	34	4	291	0.00653794	0.0064769	0.00694728	0.00195122	0.00971976	0.00547834	0.563628
K9EYN5	Elongation factor Ts OS=Actinobaculum massiliense ACS-171-V-Col2 OX=883066 GN=tsf PE=3 SV=1 - [K9EYN5_9ACTO]	337	18	1	18	74.65	30.3929	5.10986	85	40	20	7	185	0.00646191	0.00681779	0.00408664	0.00341463	0.00617923	0.00519524	0.840759
K9EVH9	Uncharacterized protein OS=Actinobaculum massiliense ACS-171-V-Col2 OX=883066 GN=HMPREF9233_01115 PE=4 SV=1 - [K9EVH9_9ACTO]	207	8	1	8	71.88	21.5779	5.43994	72	37	34	4	60	0.00547362	0.00630646	0.00694728	0.00195122	0.00200407	0.00516965	2.57957
K9EE14	Acetate kinase OS=Actinobaculum massiliense ACS-171-V-Col2 OX=883066 GN=ackA PE=3 SV=1 - [K9EE14_9ACTO]	338	19	1	19	74.43	42.7548	5.35107	82	19	21	14	202	0.00623385	0.00323845	0.00429097	0.00682927	0.00674705	0.00514813	0.76302
K9F002	DNA-directed RNA polymerase subunit beta OS=Actinobaculum massiliense ACS-171-V-Col2 OX=883066 GN=rpoB PE=3 SV=1 - [K9F002_9ACTO]	288	33	1	32	43.58	128.908	4.89404	86	37	25	5	135	0.00653794	0.00630646	0.0051083	0.00243902	0.00450917	0.00509793	1.13057
K9EDX8	10 kDa chaperonin OS=Actinobaculum massiliense ACS-171-V-Col2 OX=883066 GN=groS PE=3 SV=1 - [K9EDX8_9ACTO]	169	6	1	6	81.63	10.5685	4.75439	34	16	18	22	79	0.00258477	0.00272712	0.00367797	0.0107317	0.0026387	0.00493039	1.86849
K9EVJ0	50S ribosomal protein L25 OS=Actinobaculum massiliense ACS-171-V-Col2 OX=883066 GN=rplY PE=3 SV=1 - [K9EVJ0_9ACTO]	223	6	1	6	52.31	23.409	4.50049	51	34	20	12	106	0.00387715	0.00579513	0.00408664	0.00585366	0.00354053	0.00490314	1.38486
K9EGG7	Uncharacterized protein OS=Actinobaculum massiliense ACS-171-V-Col2 OX=883066 GN=HMPREF9233_01410 PE=4 SV=1 - [K9EGG7_9ACTO]	121	12	2	12	41.82	47.4314	5.2876	23	3	10	30	55	0.00174852	0.000511335	0.00204332	0.0146341	0.00183707	0.00473433	2.57711
K9EHH9	30S ribosomal protein S2 OS=Actinobaculum massiliense ACS-171-V-Col2 OX=883066 GN=rpsB PE=3 SV=1 - [K9EHH9_9ACTO]	243	12	1	12	50.86	32.1134	4.90674	52	46	22	5	118	0.00395317	0.00784046	0.0044953	0.00243902	0.00394135	0.00468199	1.18792
K9EDJ2	Uncharacterized protein OS=Actinobaculum massiliense ACS-171-V-Col2 OX=883066 GN=HMPREF9233_01065 PE=4 SV=1 - [K9EDJ2_9ACTO]	277	10	1	10	54.18	27.636	4.95752	71	21	14	14	157	0.0053976	0.00357934	0.00286065	0.00682927	0.005244	0.00466671	0.889916
K9EF34	Uncharacterized protein OS=Actinobaculum massiliense ACS-171-V-Col2 OX=883066 GN=HMPREF9233_01413 PE=4 SV=1 - [K9EF34_9ACTO]	132	15	1	15	53.63	43.1564	5.21143	34	14	21	18	45	0.00258477	0.00238623	0.00429097	0.00878049	0.00150306	0.00451061	3.00096
K9EBI6	Uncharacterized protein OS=Actinobaculum massiliense ACS-171-V-Col2 OX=883066 GN=HMPREF9233_01576 PE=4 SV=1 - [K9EBI6_9ACTO]	141	6	1	6	61.07	16.1112	5.99854	45	37	31	4	24	0.00342101	0.00630646	0.00633429	0.00195122	0.00080163	0.00450324	5.61761
K9F048	DNA-directed RNA polymerase subunit alpha OS=Actinobaculum massiliense ACS-171-V-Col2 OX=883066 GN=rpoA PE=3 SV=1 - [K9F048_9ACTO]	194	12	1	12	54.1	36.0798	4.729	60	24	29	7	74	0.00456135	0.00409068	0.00592562	0.00341463	0.00247169	0.00449807	1.81983
K9F278	ATP synthase subunit alpha OS=Actinobaculum massiliense ACS-171-V-Col2 OX=883066 GN=atpA PE=3 SV=1 - [K9F278_9ACTO]	311	22	1	21	55.74	59.0732	4.93213	87	41	16	1	166	0.00661396	0.00698824	0.00326931	0.000487805	0.00554461	0.00433983	0.782711
K9EFN3	Ornithine carbamoyltransferase OS=Actinobaculum massiliense ACS-171-V-Col2 OX=883066 GN=HMPREF9233_01648 PE=3 SV=1 - [K9EFN3_9ACTO]	125	11	2	11	42.39	37.8437	5.04639	48	74	0	1	2	0.00364908	0.0126129	0	0.000487805	6.68025e-05	0.00418745	62.6841
K9F2H7	Uncharacterized protein OS=Actinobaculum massiliense ACS-171-V-Col2 OX=883066 GN=HMPREF9233_00462 PE=4 SV=1 - [K9F2H7_9ACTO]	188	14	1	14	24.4	89.7905	6.59521	27	9	30	14	108	0.00205261	0.001534	0.00612996	0.00682927	0.00360733	0.00413646	1.14668
K9EXA7	Uncharacterized protein OS=Actinobaculum massiliense ACS-171-V-Col2 OX=883066 GN=HMPREF9233_00404 PE=4 SV=1 - [K9EXA7_9ACTO]	462	29	1	29	46.76	91.3464	5.49072	85	54	1	0	322	0.00646191	0.00920402	0.000204332	0	0.0107552	0.00396757	0.368897
K9EGB7	Uncharacterized protein OS=Actinobaculum massiliense ACS-171-V-Col2 OX=883066 GN=HMPREF9233_01335 PE=4 SV=1 - [K9EGB7_9ACTO]	503	11	1	11	46.42	40.1254	4.7417	82	53	2	0	366	0.00623385	0.00903358	0.000408664	0	0.0122249	0.00391902	0.320578
K9EDU0	Uncharacterized protein OS=Actinobaculum massiliense ACS-171-V-Col2 OX=883066 GN=HMPREF9233_00734 PE=4 SV=1 - [K9EDU0_9ACTO]	191	12	1	12	56.46	33.0757	4.85596	59	26	27	2	77	0.00448533	0.00443157	0.00551696	0.00097561	0.0025719	0.00385237	1.49787
K9EVW6	Uncharacterized protein OS=Actinobaculum massiliense ACS-171-V-Col2 OX=883066 GN=HMPREF9233_00893 PE=3 SV=1 - [K9EVW6_9ACTO]	214	27	1	26	47.81	95.5147	5.32568	65	0	10	17	122	0.00494146	0	0.00204332	0.00829268	0.00407495	0.00381937	0.937279
K9EGZ6	Uncharacterized protein OS=Actinobaculum massiliense ACS-171-V-Col2 OX=883066 GN=HMPREF9233_00680 PE=4 SV=1 - [K9EGZ6_9ACTO]	704	27	1	27	64.33	57.1063	4.81787	117	32	2	1	552	0.00889463	0.00545424	0.000408664	0.000487805	0.0184375	0.00381133	0.206717
K9EC56	Adenylate kinase OS=Actinobaculum massiliense ACS-171-V-Col2 OX=883066 GN=adk PE=3 SV=1 - [K9EC56_9ACTO]	174	11	1	11	69.07	20.8987	4.66553	58	16	35	1	64	0.00440931	0.00272712	0.00715161	0.000487805	0.00213768	0.00369396	1.72802
K9F0E1	Uncharacterized protein OS=Actinobaculum massiliense ACS-171-V-Col2 OX=883066 GN=HMPREF9233_01379 PE=4 SV=1 - [K9F0E1_9ACTO]	72	3	1	3	58.18	5.81108	4.84326	21	11	16	16	8	0.00159647	0.00187489	0.00326931	0.00780488	0.00026721	0.00363639	13.6087
K9EUR7	dTDP-glucose 4,6-dehydratase OS=Actinobaculum massiliense ACS-171-V-Col2 OX=883066 GN=HMPREF9233_01206 PE=3 SV=1 - [K9EUR7_9ACTO]	192	13	1	13	56.67	36.9285	5.36377	36	16	42	1	97	0.00273681	0.00272712	0.00858194	0.000487805	0.00323992	0.00363342	1.12145
K9EVB5	Formate acetyltransferase OS=Actinobaculum massiliense ACS-171-V-Col2 OX=883066 GN=HMPREF9233_01341 PE=4 SV=1 - [K9EVB5_9ACTO]	100	4	1	4	60.98	9.39669	6.13818	37	21	10	12	20	0.00281283	0.00357934	0.00204332	0.00585366	0.000668025	0.00357229	5.34754
K9EUX4	50S ribosomal protein L10 OS=Actinobaculum massiliense ACS-171-V-Col2 OX=883066 GN=rplJ PE=3 SV=1 - [K9EUX4_9ACTO]	147	7	1	7	61.49	18.6298	6.04932	52	12	25	6	52	0.00395317	0.00204534	0.0051083	0.00292683	0.00173686	0.00350841	2.01997
K9EFL7	DivIVA domain-containing protein OS=Actinobaculum massiliense ACS-171-V-Col2 OX=883066 GN=HMPREF9233_00132 PE=4 SV=1 - [K9EFL7_9ACTO]	142	5	1	5	41.03	21.3386	4.52588	24	19	20	10	69	0.00182454	0.00323845	0.00408664	0.00487805	0.00230469	0.00350692	1.52165
K9EDS4	50S ribosomal protein L22 OS=Actinobaculum massiliense ACS-171-V-Col2 OX=883066 GN=rplV PE=3 SV=1 - [K9EDS4_9ACTO]	93	6	1	6	43.08	14.8389	10.5503	34	22	8	12	17	0.00258477	0.00374979	0.00163465	0.00585366	0.000567821	0.00345572	6.08592
K9EUL9	Carbamate kinase OS=Actinobaculum massiliense ACS-171-V-Col2 OX=883066 GN=HMPREF9233_01649 PE=3 SV=1 - [K9EUL9_9ACTO]	112	13	1	13	64.24	31.7555	4.86865	49	59	0	0	4	0.0037251	0.0100562	0	0	0.000133605	0.00344534	25.7875
K9EUC6	Putative glucose-6-phosphate 1-epimerase OS=Actinobaculum massiliense ACS-171-V-Col2 OX=883066 GN=HMPREF9233_01534 PE=3 SV=1 - [K9EUC6_9ACTO]	107	9	1	8	47.57	30.8752	4.51318	24	9	39	5	30	0.00182454	0.001534	0.00796894	0.00243902	0.00100204	0.00344163	3.43463
K9F054	50S ribosomal protein L13 OS=Actinobaculum massiliense ACS-171-V-Col2 OX=883066 GN=rplM PE=3 SV=1 - [K9F054_9ACTO]	105	7	1	7	63.27	16.2197	9.83252	37	20	5	13	30	0.00281283	0.0034089	0.00102166	0.00634146	0.00100204	0.00339621	3.38931
K9F3G6	Pyruvate dehydrogenase E1 component OS=Actinobaculum massiliense ACS-171-V-Col2 OX=883066 GN=HMPREF9233_00088 PE=4 SV=1 - [K9F3G6_9ACTO]	383	29	1	29	49.07	102.313	5.45264	52	14	21	6	290	0.00395317	0.00238623	0.00429097	0.00292683	0.00968636	0.0033893	0.349904
K9EI91	3-dehydroquinate dehydratase OS=Actinobaculum massiliense ACS-171-V-Col2 OX=883066 GN=aroD PE=3 SV=1 - [K9EI91_9ACTO]	220	11	1	11	66.29	29.1842	5.49072	44	38	6	5	127	0.00334499	0.0064769	0.00122599	0.00243902	0.00424196	0.00337173	0.794852
K9EG36	50S ribosomal protein L2 OS=Actinobaculum massiliense ACS-171-V-Col2 OX=883066 GN=rplB PE=3 SV=1 - [K9EG36_9ACTO]	140	8	1	8	44.6	30.5895	11.3853	46	18	12	9	55	0.00349704	0.00306801	0.00245198	0.00439024	0.00183707	0.00335182	1.82455
K9EJN7	Polyribonucleotide nucleotidyltransferase OS=Actinobaculum massiliense ACS-171-V-Col2 OX=883066 GN=pnp PE=3 SV=1 - [K9EJN7_9ACTO]	274	26	1	26	48.26	89.8629	4.80518	90	18	12	2	152	0.00684203	0.00306801	0.00245198	0.00097561	0.00507699	0.00333441	0.656768
K9EVS8	Glutamate dehydrogenase OS=Actinobaculum massiliense ACS-171-V-Col2 OX=883066 GN=HMPREF9233_00848 PE=3 SV=1 - [K9EVS8_9ACTO]	104	8	1	7	23.37	48.131	5.021	39	51	7	0	7	0.00296488	0.00869269	0.00143032	0	0.000233809	0.00327197	13.9942
K9F027	50S ribosomal protein L5 OS=Actinobaculum massiliense ACS-171-V-Col2 OX=883066 GN=rplE PE=3 SV=1 - [K9F027_9ACTO]	294	9	1	9	57.46	20.4517	9.31982	53	24	7	7	203	0.00402919	0.00409068	0.00143032	0.00341463	0.00678045	0.00324121	0.478022
K9F3F9	3-methyl-2-oxobutanoate hydroxymethyltransferase OS=Actinobaculum massiliense ACS-171-V-Col2 OX=883066 GN=panB PE=3 SV=1 - [K9F3F9_9ACTO]	101	6	1	6	31.03	31.2449	5.75732	45	15	29	2	10	0.00342101	0.00255667	0.00592562	0.00097561	0.000334012	0.00321973	9.63955
K9EB79	50S ribosomal protein L27 OS=Actinobaculum massiliense ACS-171-V-Col2 OX=883066 GN=rpmA PE=3 SV=1 - [K9EB79_9ACTO]	249	3	1	3	37.35	8.92172	11.2241	20	9	26	9	185	0.00152045	0.001534	0.00531263	0.00439024	0.00617923	0.00318933	0.516137
K9EYE9	Lactaldehyde reductase OS=Actinobaculum massiliense ACS-171-V-Col2 OX=883066 GN=HMPREF9233_00095 PE=4 SV=1 - [K9EYE9_9ACTO]	358	14	1	14	73.89	40.3897	4.88135	89	32	0	1	236	0.006766	0.00545424	0	0.000487805	0.00788269	0.00317701	0.403036
K9EC92	Inosine-5'-monophosphate dehydrogenase OS=Actinobaculum massiliense ACS-171-V-Col2 OX=883066 GN=guaB PE=3 SV=1 - [K9EC92_9ACTO]	144	19	1	18	53.78	53.3195	5.50342	43	18	19	5	59	0.00326897	0.00306801	0.0038823	0.00243902	0.00197067	0.00316458	1.60583
K9EDR6	50S ribosomal protein L3 OS=Actinobaculum massiliense ACS-171-V-Col2 OX=883066 GN=rplC PE=3 SV=1 - [K9EDR6_9ACTO]	110	8	1	8	56.11	23.2173	10.272	33	27	10	7	33	0.00250874	0.00460201	0.00204332	0.00341463	0.00110224	0.00314218	2.85072
K9EYD3	Dihydrolipoamide acetyltransferase component of pyruvate dehydrogenase complex OS=Actinobaculum massiliense ACS-171-V-Col2 OX=883066 GN=HMPREF9233_00070 PE=3 SV=1 - [K9EYD3_9ACTO]	261	13	1	13	30.5	59.6405	4.61475	29	2	27	9	194	0.00220465	0.00034089	0.00551696	0.00439024	0.00647984	0.00311319	0.480442
K9EEX7	Uncharacterized protein OS=Actinobaculum massiliense ACS-171-V-Col2 OX=883066 GN=HMPREF9233_00989 PE=4 SV=1 - [K9EEX7_9ACTO]	171	12	1	12	70.22	24.9421	5.8335	48	19	20	3	81	0.00364908	0.00323845	0.00408664	0.00146341	0.0027055	0.0031094	1.14929
K9EGM7	Oligopeptide/dipeptide ABC transporter, ATP-binding protein domain OS=Actinobaculum massiliense ACS-171-V-Col2 OX=883066 GN=HMPREF9233_01184 PE=3 SV=1 - [K9EGM7_9ACTO]	176	21	3	20	47.44	68.408	6.04932	58	28	8	3	79	0.00440931	0.00477246	0.00163465	0.00146341	0.0026387	0.00306996	1.16344
K9EYP4	50S ribosomal protein L19 OS=Actinobaculum massiliense ACS-171-V-Col2 OX=883066 GN=rplS PE=3 SV=1 - [K9EYP4_9ACTO]	100	5	1	5	43.1	13.174	10.3013	37	21	16	5	21	0.00281283	0.00357934	0.00326931	0.00243902	0.000701426	0.00302513	4.31282
K9EGP7	Fructose-bisphosphate aldolase, class II OS=Actinobaculum massiliense ACS-171-V-Col2 OX=883066 GN=HMPREF9233_00837 PE=3 SV=1 - [K9EGP7_9ACTO]	244	11	1	11	45.13	36.7465	5.16064	53	27	6	4	154	0.00402919	0.00460201	0.00122599	0.00195122	0.00514379	0.0029521	0.573916
K9ECM9	Lipoprotein OS=Actinobaculum massiliense ACS-171-V-Col2 OX=883066 GN=HMPREF9233_01162 PE=3 SV=1 - [K9ECM9_9ACTO]	100	9	1	9	42.21	31.3761	4.86865	33	22	15	5	25	0.00250874	0.00374979	0.00306498	0.00243902	0.000835031	0.00294063	3.52158
K9EZP8	Uncharacterized protein OS=Actinobaculum massiliense ACS-171-V-Col2 OX=883066 GN=HMPREF9233_01667 PE=4 SV=1 - [K9EZP8_9ACTO]	134	11	1	11	36.72	41.3594	4.93213	39	12	19	5	59	0.00296488	0.00204534	0.0038823	0.00243902	0.00197067	0.00283289	1.43752
K9EFB0	Uncharacterized protein OS=Actinobaculum massiliense ACS-171-V-Col2 OX=883066 GN=HMPREF9233_00671 PE=4 SV=1 - [K9EFB0_9ACTO]	148	11	1	11	48.39	49.7984	4.64014	56	39	0	0	53	0.00425726	0.00664735	0	0	0.00177027	0.00272615	1.53997
K9EYC7	Uncharacterized protein OS=Actinobaculum massiliense ACS-171-V-Col2 OX=883066 GN=HMPREF9233_00060 PE=4 SV=1 - [K9EYC7_9ACTO]	171	16	1	16	53.54	46.5075	5.51611	53	18	15	1	84	0.00402919	0.00306801	0.00306498	0.000487805	0.0028057	0.0026625	0.948958
K9EJG0	Dihydrolipoyl dehydrogenase OS=Actinobaculum massiliense ACS-171-V-Col2 OX=883066 GN=HMPREF9233_00069 PE=3 SV=1 - [K9EJG0_9ACTO]	249	23	1	23	68.42	49.1484	5.84619	35	6	34	0	174	0.00266079	0.00102267	0.00694728	0	0.00581182	0.00265768	0.45729
K9EC52	50S ribosomal protein L18 OS=Actinobaculum massiliense ACS-171-V-Col2 OX=883066 GN=rplR PE=3 SV=1 - [K9EC52_9ACTO]	92	7	1	7	52.03	13.2092	11.605	31	19	12	5	25	0.0023567	0.00323845	0.00245198	0.00243902	0.000835031	0.00262154	3.13945
K9EUI6	30S ribosomal protein S4 OS=Actinobaculum massiliense ACS-171-V-Col2 OX=883066 GN=rpsD PE=3 SV=1 - [K9EUI6_9ACTO]	118	12	1	12	60.39	23.7588	10.4917	49	22	9	2	36	0.0037251	0.00374979	0.00183899	0.00097561	0.00120244	0.00257237	2.13928
K9EW93	Amidohydrolase OS=Actinobaculum massiliense ACS-171-V-Col2 OX=883066 GN=HMPREF9233_01018 PE=4 SV=1 - [K9EW93_9ACTO]	274	15	1	15	55.72	43.9551	4.75439	27	14	21	3	209	0.00205261	0.00238623	0.00429097	0.00146341	0.00698086	0.0025483	0.365042
K9EUJ0	Aspartate--tRNA(Asp/Asn) ligase OS=Actinobaculum massiliense ACS-171-V-Col2 OX=883066 GN=aspS PE=3 SV=1 - [K9EUJ0_9ACTO]	158	14	1	14	35.5	67.9694	5.26221	33	20	20	0	85	0.00250874	0.0034089	0.00408664	0	0.00283911	0.00250107	0.880935
K9EC36	50S ribosomal protein L4 OS=Actinobaculum massiliense ACS-171-V-Col2 OX=883066 GN=rplD PE=3 SV=1 - [K9EC36_9ACTO]	120	6	1	6	30.23	23.1573	10.0229	28	25	15	1	51	0.00212863	0.00426112	0.00306498	0.000487805	0.00170346	0.00248563	1.45916
K9EBY2	Glucose-1-phosphate thymidylyltransferase OS=Actinobaculum massiliense ACS-171-V-Col2 OX=883066 GN=HMPREF9233_01228 PE=3 SV=1 - [K9EBY2_9ACTO]	82	10	1	9	46.62	32.4375	5.03369	20	8	34	0	20	0.00152045	0.00136356	0.00694728	0	0.000668025	0.00245782	3.67924
K9EJD8	Uncharacterized protein OS=Actinobaculum massiliense ACS-171-V-Col2 OX=883066 GN=HMPREF9233_00029 PE=3 SV=1 - [K9EJD8_9ACTO]	91	6	1	6	52	16.5364	4.79248	31	26	10	2	22	0.0023567	0.00443157	0.00204332	0.00097561	0.000734827	0.0024518	3.33656
K9EDX1	Uncharacterized protein OS=Actinobaculum massiliense ACS-171-V-Col2 OX=883066 GN=HMPREF9233_00749 PE=4 SV=1 - [K9EDX1_9ACTO]	91	15	1	15	55.31	34.8744	5.31299	18	15	12	7	39	0.00136841	0.00255667	0.00245198	0.00341463	0.00130265	0.00244792	1.87919
K9EF70	Phosphoglucomutase, alpha-D-glucose phosphate-specific OS=Actinobaculum massiliense ACS-171-V-Col2 OX=883066 GN=HMPREF9233_00646 PE=3 SV=1 - [K9EF70_9ACTO]	157	19	1	19	54.3	59.6797	4.7417	17	3	29	4	104	0.00129238	0.000511335	0.00592562	0.00195122	0.00347373	0.00242014	0.696698
K9ECD1	Phosphate acetyltransferase OS=Actinobaculum massiliense ACS-171-V-Col2 OX=883066 GN=HMPREF9233_01338 PE=4 SV=1 - [K9ECD1_9ACTO]	182	18	1	18	51.02	56.746	4.75439	55	13	16	0	98	0.00418124	0.00221578	0.00326931	0	0.00327332	0.00241658	0.738266
K9EFJ3	Peptidyl-prolyl cis-trans isomerase OS=Actinobaculum massiliense ACS-171-V-Col2 OX=883066 GN=HMPREF9233_00748 PE=3 SV=1 - [K9EFJ3_9ACTO]	190	5	1	5	51.45	18.6251	4.55127	30	4	28	2	126	0.00228068	0.000681779	0.00572129	0.00097561	0.00420856	0.00241484	0.573793
K9EZI4	Elongation factor P OS=Actinobaculum massiliense ACS-171-V-Col2 OX=883066 GN=efp PE=3 SV=1 - [K9EZI4_9ACTO]	157	7	1	7	64.71	20.7385	5.26221	39	7	22	2	87	0.00296488	0.00119311	0.0044953	0.00097561	0.00290591	0.00240723	0.82839
K9EH30	Uncharacterized protein OS=Actinobaculum massiliense ACS-171-V-Col2 OX=883066 GN=HMPREF9233_00031 PE=4 SV=1 - [K9EH30_9ACTO]	130	7	1	7	41.54	28.7385	4.7417	10	8	14	9	89	0.000760225	0.00136356	0.00286065	0.00439024	0.00297271	0.00234367	0.788394
K9EET6	Uncharacterized protein OS=Actinobaculum massiliense ACS-171-V-Col2 OX=883066 GN=HMPREF9233_00954 PE=4 SV=1 - [K9EET6_9ACTO]	116	14	1	14	43.12	49.4133	4.91943	61	17	8	0	30	0.00463737	0.00289756	0.00163465	0	0.00100204	0.0022924	2.28774
K9EC42	30S ribosomal protein S3 OS=Actinobaculum massiliense ACS-171-V-Col2 OX=883066 GN=rpsC PE=3 SV=1 - [K9EC42_9ACTO]	183	8	1	8	36.86	30.446	10.6821	40	21	10	1	111	0.0030409	0.00357934	0.00204332	0.000487805	0.00370754	0.00228784	0.617078
K9EUY7	30S ribosomal protein S10 OS=Actinobaculum massiliense ACS-171-V-Col2 OX=883066 GN=rpsJ PE=3 SV=1 - [K9EUY7_9ACTO]	77	5	1	5	45.1	11.6664	9.64209	33	9	13	5	17	0.00250874	0.001534	0.00265631	0.00243902	0.000567821	0.00228452	4.02331
K9EZ77	Uncharacterized protein OS=Actinobaculum massiliense ACS-171-V-Col2 OX=883066 GN=HMPREF9233_01482 PE=4 SV=1 - [K9EZ77_9ACTO]	166	17	1	17	50.67	48.9174	5.69385	35	21	7	3	100	0.00266079	0.00357934	0.00143032	0.00146341	0.00334012	0.00228347	0.683647
K9EC22	50S ribosomal protein L11 OS=Actinobaculum massiliense ACS-171-V-Col2 OX=883066 GN=rplK PE=3 SV=1 - [K9EC22_9ACTO]	87	5	1	5	34.03	15.1111	9.23193	29	10	16	4	28	0.00220465	0.00170445	0.00326931	0.00195122	0.000935235	0.00228241	2.44046
K9EDT1	50S ribosomal protein L14 OS=Actinobaculum massiliense ACS-171-V-Col2 OX=883066 GN=rplN PE=3 SV=1 - [K9EDT1_9ACTO]	68	6	1	5	48.36	13.2882	10.0669	23	9	9	8	19	0.00174852	0.001534	0.00183899	0.00390244	0.000634624	0.00225599	3.55484
K9EG25	Uncharacterized protein OS=Actinobaculum massiliense ACS-171-V-Col2 OX=883066 GN=HMPREF9233_00405 PE=3 SV=1 - [K9EG25_9ACTO]	358	13	1	13	71.2	32.9879	4.70361	35	12	16	2	293	0.00266079	0.00204534	0.00326931	0.00097561	0.00978657	0.00223776	0.228656
K9EGU5	Uncharacterized protein OS=Actinobaculum massiliense ACS-171-V-Col2 OX=883066 GN=HMPREF9233_00897 PE=3 SV=1 - [K9EGU5_9ACTO]	93	11	1	11	55.71	38.1713	4.84326	24	1	34	0	34	0.00182454	0.000170445	0.00694728	0	0.00113564	0.00223557	1.96855
K9ED31	Triosephosphate isomerase OS=Actinobaculum massiliense ACS-171-V-Col2 OX=883066 GN=tpiA PE=3 SV=1 - [K9ED31_9ACTO]	342	14	1	14	86.1	27.967	4.93213	51	15	12	0	264	0.00387715	0.00255667	0.00245198	0	0.00881793	0.00222145	0.251924
K9EYL4	30S ribosomal protein S15 OS=Actinobaculum massiliense ACS-171-V-Col2 OX=883066 GN=rpsO PE=3 SV=1 - [K9EYL4_9ACTO]	101	4	1	4	64.04	10.3816	9.68604	22	17	6	6	50	0.0016725	0.00289756	0.00122599	0.00292683	0.00167006	0.00218072	1.30577
K9F0S8	LPXTG-domain-containing protein cell wall anchor domain OS=Actinobaculum massiliense ACS-171-V-Col2 OX=883066 GN=HMPREF9233_00866 PE=4 SV=1 - [K9F0S8_9ACTO]	71	12	1	12	40.39	54.0588	6.75635	5	1	35	2	28	0.000380113	0.000170445	0.00715161	0.00097561	0.000935235	0.00216945	2.31968
K9EYM7	Proline--tRNA ligase OS=Actinobaculum massiliense ACS-171-V-Col2 OX=883066 GN=proS PE=3 SV=1 - [K9EYM7_9ACTO]	102	21	1	21	49.66	65.6387	5.021	17	6	28	1	50	0.00129238	0.00102267	0.00572129	0.000487805	0.00167006	0.00213104	1.27602
K9F013	50S ribosomal protein L23 OS=Actinobaculum massiliense ACS-171-V-Col2 OX=883066 GN=rplW PE=3 SV=1 - [K9F013_9ACTO]	73	5	1	5	49.5	11.5002	9.70068	25	16	11	3	18	0.00190056	0.00272712	0.00224765	0.00146341	0.000601222	0.00208469	3.46741
K9EGV9	Uncharacterized protein OS=Actinobaculum massiliense ACS-171-V-Col2 OX=883066 GN=HMPREF9233_00912 PE=4 SV=1 - [K9EGV9_9ACTO]	80	13	1	13	38.88	56.4602	5.09717	58	18	4	0	0	0.00440931	0.00306801	0.000817327	0	0	0.00207366	#NUM!
K9F0X4	D-xylose ABC transporter, D-xylose-binding protein OS=Actinobaculum massiliense ACS-171-V-Col2 OX=883066 GN=HMPREF9233_00911 PE=4 SV=1 - [K9F0X4_9ACTO]	59	6	1	6	24.6	40.5983	4.84326	33	12	11	3	0	0.00250874	0.00204534	0.00224765	0.00146341	0	0.00206629	#NUM!
K9EZM5	Arginine deiminase OS=Actinobaculum massiliense ACS-171-V-Col2 OX=883066 GN=arcA PE=3 SV=1 - [K9EZM5_9ACTO]	64	7	1	7	20.44	44.7827	5.26221	23	35	0	1	5	0.00174852	0.00596557	0	0.000487805	0.000167006	0.00205047	12.2778
K9EZZ7	50S ribosomal protein L1 OS=Actinobaculum massiliense ACS-171-V-Col2 OX=883066 GN=rplA PE=3 SV=1 - [K9EZZ7_9ACTO]	97	7	1	7	41.63	25.0409	9.15869	20	15	10	4	48	0.00152045	0.00255667	0.00204332	0.00195122	0.00160326	0.00201792	1.25863
K9EJB3	Glucosamine-6-phosphate deaminase OS=Actinobaculum massiliense ACS-171-V-Col2 OX=883066 GN=HMPREF9233_00683 PE=3 SV=1 - [K9EJB3_9ACTO]	160	10	1	10	67.83	27.4789	4.90674	36	11	14	1	98	0.00273681	0.00187489	0.00286065	0.000487805	0.00327332	0.00199004	0.607957
K9EJS4	30S ribosomal protein S16 OS=Actinobaculum massiliense ACS-171-V-Col2 OX=883066 GN=rpsP PE=3 SV=1 - [K9EJS4_9ACTO]	164	4	1	4	30.36	18.6866	5.8208	35	9	16	1	103	0.00266079	0.001534	0.00326931	0.000487805	0.00344033	0.00198798	0.577845
K9F0H6	Ribose-phosphate pyrophosphokinase OS=Actinobaculum massiliense ACS-171-V-Col2 OX=883066 GN=prs PE=3 SV=1 - [K9F0H6_9ACTO]	88	12	1	12	55.05	35.5508	6.56592	28	3	16	4	37	0.00212863	0.000511335	0.00326931	0.00195122	0.00123585	0.00196512	1.5901
K9EVC8	Glucose-6-phosphate isomerase OS=Actinobaculum massiliense ACS-171-V-Col2 OX=883066 GN=pgi PE=3 SV=1 - [K9EVC8_9ACTO]	100	16	1	16	42.83	60.8036	5.17334	24	8	22	0	46	0.00182454	0.00136356	0.0044953	0	0.00153646	0.00192085	1.25018
K9EBW9	dTDP-4-dehydrorhamnose 3,5-epimerase OS=Actinobaculum massiliense ACS-171-V-Col2 OX=883066 GN=HMPREF9233_01218 PE=4 SV=1 - [K9EBW9_9ACTO]	117	10	1	10	56.1	22.6063	4.89404	16	7	21	2	71	0.00121636	0.00119311	0.00429097	0.00097561	0.00237149	0.00191901	0.809202
K9EV14	30S ribosomal protein S8 OS=Actinobaculum massiliense ACS-171-V-Col2 OX=883066 GN=rpsH PE=3 SV=1 - [K9EV14_9ACTO]	84	4	1	4	45.45	14.5457	9.36377	34	12	10	2	26	0.00258477	0.00204534	0.00204332	0.00097561	0.000868432	0.00191226	2.20196
K9EGF1	Uncharacterized protein OS=Actinobaculum massiliense ACS-171-V-Col2 OX=883066 GN=HMPREF9233_01385 PE=3 SV=1 - [K9EGF1_9ACTO]	97	16	1	16	41.24	55.4927	5.26221	13	3	30	0	51	0.000988293	0.000511335	0.00612996	0	0.00170346	0.0019074	1.11972
K9EHB4	Cell division protein FtsZ OS=Actinobaculum massiliense ACS-171-V-Col2 OX=883066 GN=ftsZ PE=3 SV=1 - [K9EHB4_9ACTO]	135	12	1	12	48.4	42.3597	4.51318	43	13	5	2	72	0.00326897	0.00221578	0.00102166	0.00097561	0.00240489	0.0018705	0.777792
K9EX30	Branched-chain amino acid aminotransferase OS=Actinobaculum massiliense ACS-171-V-Col2 OX=883066 GN=HMPREF9233_00309 PE=4 SV=1 - [K9EX30_9ACTO]	71	9	1	9	35.36	41.0095	4.91943	18	12	15	2	24	0.00136841	0.00204534	0.00306498	0.00097561	0.00080163	0.00186358	2.32474
K9F0X6	Uncharacterized protein OS=Actinobaculum massiliense ACS-171-V-Col2 OX=883066 GN=HMPREF9233_00916 PE=4 SV=1 - [K9F0X6_9ACTO]	305	36	1	36	55.49	115.609	5.49072	42	25	0	0	238	0.00319295	0.00426112	0	0	0.0079495	0.00186352	0.234419
K9EG18	Threonine synthase OS=Actinobaculum massiliense ACS-171-V-Col2 OX=883066 GN=HMPREF9233_00395 PE=3 SV=1 - [K9EG18_9ACTO]	69	9	1	9	31.97	38.1344	5.09717	9	2	17	6	35	0.000684203	0.00034089	0.00347364	0.00292683	0.00116904	0.00185639	1.58796
K9EV26	50S ribosomal protein L15 OS=Actinobaculum massiliense ACS-171-V-Col2 OX=883066 GN=rplO PE=3 SV=1 - [K9EV26_9ACTO]	98	6	1	6	54.66	17.1841	9.65674	34	17	7	1	39	0.00258477	0.00289756	0.00143032	0.000487805	0.00130265	0.00185011	1.42027
K9ED48	2-dehydro-3-deoxyphosphogluconate aldolase/4-hydroxy-2-oxoglutarate aldolase OS=Actinobaculum massiliense ACS-171-V-Col2 OX=883066 GN=HMPREF9233_01565 PE=4 SV=1 - [K9ED48_9ACTO]	90	5	1	5	49.07	23.0791	5.19873	31	11	15	0	33	0.0023567	0.00187489	0.00306498	0	0.00110224	0.00182414	1.65494
K9ECP8	Uncharacterized protein OS=Actinobaculum massiliense ACS-171-V-Col2 OX=883066 GN=HMPREF9233_01182 PE=3 SV=1 - [K9ECP8_9ACTO]	76	4	1	4	16.1	35.7462	9.5542	24	18	10	0	24	0.00182454	0.00306801	0.00204332	0	0.00080163	0.00173397	2.16305
K9F3J1	Glycine--tRNA ligase OS=Actinobaculum massiliense ACS-171-V-Col2 OX=883066 GN=glyQS PE=3 SV=1 - [K9F3J1_9ACTO]	109	12	1	12	31.61	53.1647	5.46533	37	6	8	3	55	0.00281283	0.00102267	0.00163465	0.00146341	0.00183707	0.00173339	0.943564
K9EZF6	Uncharacterized protein OS=Actinobaculum massiliense ACS-171-V-Col2 OX=883066 GN=HMPREF9233_01567 PE=4 SV=1 - [K9EZF6_9ACTO]	66	5	1	5	38.94	23.1417	5.12256	32	13	11	0	10	0.00243272	0.00221578	0.00224765	0	0.000334012	0.00172404	5.1616
K9EUZ6	30S ribosomal protein S19 OS=Actinobaculum massiliense ACS-171-V-Col2 OX=883066 GN=rpsS PE=3 SV=1 - [K9EUZ6_9ACTO]	62	4	1	4	46.24	10.8247	10.521	19	9	14	2	18	0.00144443	0.001534	0.00286065	0.00097561	0.000601222	0.00170367	2.83368
K9EFT1	Uncharacterized protein OS=Actinobaculum massiliense ACS-171-V-Col2 OX=883066 GN=HMPREF9233_00285 PE=4 SV=1 - [K9EFT1_9ACTO]	92	10	1	10	50.81	28.3483	5.52881	5	0	31	0	56	0.000380113	0	0.00633429	0	0.00187047	0.0016786	0.897421
K9F393	Uncharacterized protein OS=Actinobaculum massiliense ACS-171-V-Col2 OX=883066 GN=HMPREF9233_00677 PE=4 SV=1 - [K9F393_9ACTO]	221	12	1	12	64.34	31.1014	7.25439	51	13	3	0	154	0.00387715	0.00221578	0.000612996	0	0.00514379	0.00167648	0.325923
K9EG68	30S ribosomal protein S9 OS=Actinobaculum massiliense ACS-171-V-Col2 OX=883066 GN=rpsI PE=3 SV=1 - [K9EG68_9ACTO]	57	4	1	4	38.65	17.7644	9.92041	20	9	8	4	16	0.00152045	0.001534	0.00163465	0.00195122	0.00053442	0.00166008	3.10632
K9EHX7	30S ribosomal protein S6 OS=Actinobaculum massiliense ACS-171-V-Col2 OX=883066 GN=rpsF PE=3 SV=1 - [K9EHX7_9ACTO]	33	1	1	1	14.43	11.385	7.25439	10	6	4	8	5	0.000760225	0.00102267	0.000817327	0.00390244	0.000167006	0.00162567	9.73416
K9ECW0	Uncharacterized protein OS=Actinobaculum massiliense ACS-171-V-Col2 OX=883066 GN=HMPREF9233_00865 PE=4 SV=1 - [K9ECW0_9ACTO]	47	11	1	11	45.35	38.0013	5.07178	9	3	18	3	14	0.000684203	0.000511335	0.00367797	0.00146341	0.000467617	0.00158423	3.38788
K9EIY7	Uncharacterized protein OS=Actinobaculum massiliense ACS-171-V-Col2 OX=883066 GN=HMPREF9233_00583 PE=4 SV=1 - [K9EIY7_9ACTO]	66	7	1	7	30.41	32.3176	7.53271	15	10	5	5	31	0.00114034	0.00170445	0.00102166	0.00243902	0.00103544	0.00157637	1.52241
K9EE65	Uncharacterized protein OS=Actinobaculum massiliense ACS-171-V-Col2 OX=883066 GN=HMPREF9233_00311 PE=4 SV=1 - [K9EE65_9ACTO]	82	8	1	8	45.07	32.2629	4.70361	13	4	13	4	48	0.000988293	0.000681779	0.00265631	0.00195122	0.00160326	0.0015694	0.978881
K9F0D2	Uncharacterized protein OS=Actinobaculum massiliense ACS-171-V-Col2 OX=883066 GN=HMPREF9233_01364 PE=4 SV=1 - [K9F0D2_9ACTO]	383	64	1	64	35.47	318.89	5.0083	51	2	7	1	322	0.00387715	0.00034089	0.00143032	0.000487805	0.0107552	0.00153404	0.142632
K9EI05	Uncharacterized protein OS=Actinobaculum massiliense ACS-171-V-Col2 OX=883066 GN=HMPREF9233_00268 PE=4 SV=1 - [K9EI05_9ACTO]	131	17	1	17	33.48	74.5421	4.64014	17	2	22	0	90	0.00129238	0.00034089	0.0044953	0	0.00300611	0.00153214	0.509676
K9EDR8	Adenine deaminase OS=Actinobaculum massiliense ACS-171-V-Col2 OX=883066 GN=HMPREF9233_00719 PE=3 SV=1 - [K9EDR8_9ACTO]	90	12	1	12	49.26	37.78	4.729	13	2	21	1	53	0.000988293	0.00034089	0.00429097	0.000487805	0.00177027	0.00152699	0.862576
K9EE06	50S ribosomal protein L9 OS=Actinobaculum massiliense ACS-171-V-Col2 OX=883066 GN=rplI PE=3 SV=1 - [K9EE06_9ACTO]	69	8	1	8	60.93	16.667	9.65674	30	10	3	3	23	0.00228068	0.00170445	0.000612996	0.00146341	0.000768229	0.00151538	1.97257
K9EFQ2	Trigger factor OS=Actinobaculum massiliense ACS-171-V-Col2 OX=883066 GN=tig PE=3 SV=1 - [K9EFQ2_9ACTO]	108	10	1	10	24.45	58.7823	4.4624	38	10	2	2	56	0.00288886	0.00170445	0.000408664	0.00097561	0.00187047	0.00149439	0.798941
K9F2H2	2-hydroxy-3-oxopropionate reductase OS=Actinobaculum massiliense ACS-171-V-Col2 OX=883066 GN=HMPREF9233_00457 PE=4 SV=1 - [K9F2H2_9ACTO]	114	8	1	8	50.67	31.2491	5.021	43	5	9	0	57	0.00326897	0.000852224	0.00183899	0	0.00190387	0.00149004	0.782639
K9EBS9	Glucose-1-phosphate adenylyltransferase OS=Actinobaculum massiliense ACS-171-V-Col2 OX=883066 GN=glgC PE=3 SV=1 - [K9EBS9_9ACTO]	98	12	1	12	50.6	46.0442	5.21143	11	1	17	3	66	0.000836248	0.000170445	0.00347364	0.00146341	0.00220448	0.00148594	0.674053
K9EY37	Uncharacterized protein OS=Actinobaculum massiliense ACS-171-V-Col2 OX=883066 GN=HMPREF9233_00649 PE=4 SV=1 - [K9EY37_9ACTO]	70	10	1	10	49.86	38.8426	4.7417	62	7	0	0	1	0.0047134	0.00119311	0	0	3.34012e-05	0.00147663	44.2087
K9EWK2	Uncharacterized protein OS=Actinobaculum massiliense ACS-171-V-Col2 OX=883066 GN=HMPREF9233_01093 PE=4 SV=1 - [K9EWK2_9ACTO]	50	8	1	8	36.71	33.84	4.58936	19	4	18	0	9	0.00144443	0.000681779	0.00367797	0	0.000300611	0.00145105	4.82698
K9EDT9	50S ribosomal protein L6 OS=Actinobaculum massiliense ACS-171-V-Col2 OX=883066 GN=rplF PE=3 SV=1 - [K9EDT9_9ACTO]	186	7	1	7	48.88	19.1383	9.37842	37	6	9	0	134	0.00281283	0.00102267	0.00183899	0	0.00447577	0.00141862	0.316956
K9EBH5	Uncharacterized protein OS=Actinobaculum massiliense ACS-171-V-Col2 OX=883066 GN=HMPREF9233_01566 PE=4 SV=1 - [K9EBH5_9ACTO]	84	11	1	11	45.65	40.111	5.13525	43	4	3	2	32	0.00326897	0.000681779	0.000612996	0.00097561	0.00106884	0.00138484	1.29565
K9EEY7	LPXTG-domain-containing protein cell wall anchor domain OS=Actinobaculum massiliense ACS-171-V-Col2 OX=883066 GN=HMPREF9233_00581 PE=4 SV=1 - [K9EEY7_9ACTO]	42	14	1	14	12.2	159.706	4.80518	21	5	15	0	1	0.00159647	0.000852224	0.00306498	0	3.34012e-05	0.00137842	41.2685
K9F033	30S ribosomal protein S5 OS=Actinobaculum massiliense ACS-171-V-Col2 OX=883066 GN=rpsE PE=3 SV=1 - [K9F033_9ACTO]	57	6	1	6	36.51	25.7586	9.96436	9	10	8	3	27	0.000684203	0.00170445	0.00163465	0.00146341	0.000901834	0.00137168	1.52099
K9F1X2	Uracil phosphoribosyltransferase OS=Actinobaculum massiliense ACS-171-V-Col2 OX=883066 GN=upp PE=3 SV=1 - [K9F1X2_9ACTO]	85	11	1	11	62.74	23.0122	5.021	17	11	4	3	50	0.00129238	0.00187489	0.000817327	0.00146341	0.00167006	0.001362	0.815541
K9EFB3	Uncharacterized protein OS=Actinobaculum massiliense ACS-171-V-Col2 OX=883066 GN=HMPREF9233_00676 PE=3 SV=1 - [K9EFB3_9ACTO]	287	14	1	14	69.93	32.7088	5.0083	40	6	3	1	237	0.0030409	0.00102267	0.000612996	0.000487805	0.0079161	0.00129109	0.163097
K9EDV1	30S ribosomal protein S13 OS=Actinobaculum massiliense ACS-171-V-Col2 OX=883066 GN=rpsM PE=3 SV=1 - [K9EDV1_9ACTO]	59	7	1	7	64.23	14.0245	10.5942	32	9	1	2	15	0.00243272	0.001534	0.000204332	0.00097561	0.000501019	0.00128667	2.5681
K9EJT7	Valine--tRNA ligase OS=Actinobaculum massiliense ACS-171-V-Col2 OX=883066 GN=valS PE=3 SV=1 - [K9EJT7_9ACTO]	70	14	1	14	22.54	99.7138	5.18604	21	3	14	0	32	0.00159647	0.000511335	0.00286065	0	0.00106884	0.00124211	1.16211
K9EUJ8	Uncharacterized protein OS=Actinobaculum massiliense ACS-171-V-Col2 OX=883066 GN=HMPREF9233_01624 PE=4 SV=1 - [K9EUJ8_9ACTO]	33	5	1	5	47.92	10.3429	4.75439	6	6	5	5	11	0.000456135	0.00102267	0.00102166	0.00243902	0.000367414	0.00123487	3.36098
K9F0I4	Uncharacterized protein OS=Actinobaculum massiliense ACS-171-V-Col2 OX=883066 GN=HMPREF9233_01138 PE=4 SV=1 - [K9F0I4_9ACTO]	107	16	1	16	64.86	35.3812	7.1958	28	10	5	0	64	0.00212863	0.00170445	0.00102166	0	0.00213768	0.00121368	0.567758
K9EFD0	Tyrosine--tRNA ligase OS=Actinobaculum massiliense ACS-171-V-Col2 OX=883066 GN=tyrS PE=3 SV=1 - [K9EFD0_9ACTO]	80	10	1	10	35.14	46.8528	5.12256	17	4	14	0	45	0.00129238	0.000681779	0.00286065	0	0.00150306	0.0012087	0.804163
K9EZY7	Uncharacterized protein OS=Actinobaculum massiliense ACS-171-V-Col2 OX=883066 GN=HMPREF9233_01249 PE=4 SV=1 - [K9EZY7_9ACTO]	97	10	1	10	50	34.7025	4.7417	25	6	2	3	61	0.00190056	0.00102267	0.000408664	0.00146341	0.00203748	0.00119883	0.588388
K9F3U7	Uncharacterized protein OS=Actinobaculum massiliense ACS-171-V-Col2 OX=883066 GN=HMPREF9233_00243 PE=4 SV=1 - [K9F3U7_9ACTO]	62	12	1	12	29.24	66.3294	6.39209	32	5	5	1	19	0.00243272	0.000852224	0.00102166	0.000487805	0.000634624	0.0011986	1.88868
K9EVD2	Biotin-[acetyl-CoA-carboxylase] ligase OS=Actinobaculum massiliense ACS-171-V-Col2 OX=883066 GN=HMPREF9233_01361 PE=4 SV=1 - [K9EVD2_9ACTO]	79	7	1	7	43.75	28.3287	5.16064	15	4	12	1	47	0.00114034	0.000681779	0.00245198	0.000487805	0.00156986	0.00119048	0.758333
K9EF01	Uncharacterized protein OS=Actinobaculum massiliense ACS-171-V-Col2 OX=883066 GN=HMPREF9233_01004 PE=3 SV=1 - [K9EF01_9ACTO]	96	9	1	9	35.01	38.2472	4.60205	11	9	6	2	68	0.000836248	0.001534	0.00122599	0.00097561	0.00227128	0.00114296	0.503223
K9EI69	1,4-alpha-glucan branching enzyme GlgB OS=Actinobaculum massiliense ACS-171-V-Col2 OX=883066 GN=glgB PE=3 SV=1 - [K9EI69_9ACTO]	78	17	1	16	31.94	86.0096	4.83057	6	0	20	0	52	0.000456135	0	0.00408664	0	0.00173686	0.00113569	0.653875
K9EER9	Pyruvate, phosphate dikinase OS=Actinobaculum massiliense ACS-171-V-Col2 OX=883066 GN=HMPREF9233_00939 PE=3 SV=1 - [K9EER9_9ACTO]	339	35	1	35	57.42	99.0074	5.07178	19	6	10	0	304	0.00144443	0.00102267	0.00204332	0	0.010154	0.0011276	0.11105
K9EUV9	UPF0234 protein HMPREF9233_01246 OS=Actinobaculum massiliense ACS-171-V-Col2 OX=883066 GN=HMPREF9233_01246 PE=3 SV=1 - [K9EUV9_9ACTO]	46	5	1	5	34.76	18.4416	8.89502	13	6	12	0	15	0.000988293	0.00102267	0.00245198	0	0.000501019	0.00111574	2.22693
K9ECU9	Glutamate--tRNA ligase OS=Actinobaculum massiliense ACS-171-V-Col2 OX=883066 GN=gltX PE=3 SV=1 - [K9ECU9_9ACTO]	90	14	1	14	37.62	56.4305	4.93213	36	4	5	0	45	0.00273681	0.000681779	0.00102166	0	0.00150306	0.00111006	0.738537
K9EDW4	Phosphoglucosamine mutase OS=Actinobaculum massiliense ACS-171-V-Col2 OX=883066 GN=glmM PE=3 SV=1 - [K9EDW4_9ACTO]	60	9	1	9	27.62	47.0171	4.90674	17	5	4	3	31	0.00129238	0.000852224	0.000817327	0.00146341	0.00103544	0.00110634	1.06847
K9ECD5	Probable cytosol aminopeptidase OS=Actinobaculum massiliense ACS-171-V-Col2 OX=883066 GN=pepA PE=3 SV=1 - [K9ECD5_9ACTO]	62	10	1	10	32.99	49.2474	5.24951	12	0	17	0	33	0.00091227	0	0.00347364	0	0.00110224	0.00109648	0.994771
K9EFY2	Uncharacterized protein OS=Actinobaculum massiliense ACS-171-V-Col2 OX=883066 GN=HMPREF9233_00350 PE=4 SV=1 - [K9EFY2_9ACTO]	60	6	1	6	40.49	18.2532	4.90674	7	1	8	4	40	0.000532158	0.000170445	0.00163465	0.00195122	0.00133605	0.00107212	0.802454
K9F0K0	L-lactate dehydrogenase OS=Actinobaculum massiliense ACS-171-V-Col2 OX=883066 GN=ldh PE=3 SV=1 - [K9F0K0_9ACTO]	43	6	1	6	30.84	33.6432	4.71631	7	11	9	0	16	0.000532158	0.00187489	0.00183899	0	0.00053442	0.00106151	1.98628
K9EH16	Uncharacterized protein OS=Actinobaculum massiliense ACS-171-V-Col2 OX=883066 GN=HMPREF9233_00011 PE=4 SV=1 - [K9EH16_9ACTO]	113	14	1	14	40.94	51.0581	5.47803	38	5	0	1	69	0.00288886	0.000852224	0	0.000487805	0.00230469	0.00105722	0.458727
K9EF62	Uncharacterized protein OS=Actinobaculum massiliense ACS-171-V-Col2 OX=883066 GN=HMPREF9233_01458 PE=4 SV=1 - [K9EF62_9ACTO]	66	8	1	8	52.74	25.8526	4.50049	28	3	3	2	30	0.00212863	0.000511335	0.000612996	0.00097561	0.00100204	0.00105714	1.05499
K9EH23	Probable transcriptional regulatory protein HMPREF9233_00021 OS=Actinobaculum massiliense ACS-171-V-Col2 OX=883066 GN=HMPREF9233_00021 PE=3 SV=1 - [K9EH23_9ACTO]	68	6	1	6	42.4	26.9134	4.69092	17	4	3	3	41	0.00129238	0.000681779	0.000612996	0.00146341	0.00136945	0.00101264	0.739452
K9EJQ5	Ribosome-recycling factor OS=Actinobaculum massiliense ACS-171-V-Col2 OX=883066 GN=frr PE=3 SV=1 - [K9EJQ5_9ACTO]	59	7	1	7	50.27	20.9438	5.16064	15	11	5	0	28	0.00114034	0.00187489	0.00102166	0	0.000935235	0.00100922	1.07911
K9EJA9	Oligopeptide/dipeptide ABC transporter, ATP-binding protein domain OS=Actinobaculum massiliense ACS-171-V-Col2 OX=883066 GN=HMPREF9233_00678 PE=3 SV=1 - [K9EJA9_9ACTO]	142	15	1	15	28.71	75.8656	5.37646	38	5	1	0	98	0.00288886	0.000852224	0.000204332	0	0.00327332	0.000986353	0.301331
K9F0E8	Uncharacterized protein OS=Actinobaculum massiliense ACS-171-V-Col2 OX=883066 GN=HMPREF9233_01389 PE=4 SV=1 - [K9F0E8_9ACTO]	21	2	1	2	34.25	7.86523	5.10986	5	5	6	3	2	0.000380113	0.000852224	0.00122599	0.00146341	6.68025e-05	0.000980436	14.6766
K9EIC3	Protein translocase subunit SecA OS=Actinobaculum massiliense ACS-171-V-Col2 OX=883066 GN=secA PE=3 SV=1 - [K9EIC3_9ACTO]	134	22	1	22	34.51	107.303	5.16064	24	0	0	4	106	0.00182454	0	0	0.00195122	0.00354053	0.00094394	0.26661
K9EU91	Uncharacterized protein OS=Actinobaculum massiliense ACS-171-V-Col2 OX=883066 GN=HMPREF9233_01489 PE=4 SV=1 - [K9EU91_9ACTO]	52	10	1	10	58.88	34.0508	7.26904	6	1	13	1	31	0.000456135	0.000170445	0.00265631	0.000487805	0.00103544	0.000942675	0.910411
K9F360	6-phosphogluconate dehydrogenase, decarboxylating OS=Actinobaculum massiliense ACS-171-V-Col2 OX=883066 GN=HMPREF9233_00647 PE=3 SV=1 - [K9F360_9ACTO]	94	9	1	9	34.02	53.0553	5.0083	24	7	1	1	61	0.00182454	0.00119311	0.000204332	0.000487805	0.00203748	0.000927448	0.455194
K9EZ63	Uncharacterized protein OS=Actinobaculum massiliense ACS-171-V-Col2 OX=883066 GN=HMPREF9233_01462 PE=4 SV=1 - [K9EZ63_9ACTO]	39	7	1	7	44.34	23.193	5.12256	15	9	5	0	10	0.00114034	0.001534	0.00102166	0	0.000334012	0.000924	2.76636
K9EGX9	Uncharacterized protein OS=Actinobaculum massiliense ACS-171-V-Col2 OX=883066 GN=HMPREF9233_00660 PE=3 SV=1 - [K9EGX9_9ACTO]	51	8	1	8	30.48	40.9057	5.32568	14	13	2	0	22	0.00106432	0.00221578	0.000408664	0	0.000734827	0.00092219	1.25498
K9EV70	Uncharacterized protein OS=Actinobaculum massiliense ACS-171-V-Col2 OX=883066 GN=HMPREF9233_01316 PE=4 SV=1 - [K9EV70_9ACTO]	44	9	1	9	45	31.0216	4.83057	19	1	10	0	14	0.00144443	0.000170445	0.00204332	0	0.000467617	0.000914548	1.95576
K9EFY4	ATP-dependent Clp protease proteolytic subunit OS=Actinobaculum massiliense ACS-171-V-Col2 OX=883066 GN=clpP PE=3 SV=1 - [K9EFY4_9ACTO]	46	6	1	6	38.86	23.0403	4.81787	20	1	0	4	21	0.00152045	0.000170445	0	0.00195122	0.000701426	0.000910529	1.29811
K9EWV4	D-alanine--D-alanine ligase OS=Actinobaculum massiliense ACS-171-V-Col2 OX=883066 GN=HMPREF9233_00787 PE=3 SV=1 - [K9EWV4_9ACTO]	43	5	1	5	16.4	33.9176	5.07178	14	5	6	1	17	0.00106432	0.000852224	0.00122599	0.000487805	0.000567821	0.000907584	1.59836
K9EFI1	Alanine--tRNA ligase OS=Actinobaculum massiliense ACS-171-V-Col2 OX=883066 GN=alaS PE=3 SV=1 - [K9EFI1_9ACTO]	117	26	1	26	44.99	97.1885	5.38916	27	3	5	0	82	0.00205261	0.000511335	0.00102166	0	0.0027389	0.0008964	0.327285
K9EFK5	50S ribosomal protein L20 OS=Actinobaculum massiliense ACS-171-V-Col2 OX=883066 GN=rplT PE=3 SV=1 - [K9EFK5_9ACTO]	75	5	1	5	53.54	14.7879	11.2095	31	1	5	0	38	0.0023567	0.000170445	0.00102166	0	0.00126925	0.0008872	0.698997
K9EG21	Arginine--tRNA ligase OS=Actinobaculum massiliense ACS-171-V-Col2 OX=883066 GN=argS PE=3 SV=1 - [K9EG21_9ACTO]	57	15	1	15	38.39	61.2399	5.24951	16	0	11	0	30	0.00121636	0	0.00224765	0	0.00100204	0.000866003	0.864242
K9EZK1	Uncharacterized protein OS=Actinobaculum massiliense ACS-171-V-Col2 OX=883066 GN=HMPREF9233_01622 PE=4 SV=1 - [K9EZK1_9ACTO]	40	7	1	7	15.77	64.2332	7.1958	13	9	4	0	14	0.000988293	0.001534	0.000817327	0	0.000467617	0.000834906	1.78545
K9EW15	Inorganic pyrophosphatase OS=Actinobaculum massiliense ACS-171-V-Col2 OX=883066 GN=ppa PE=3 SV=1 - [K9EW15_9ACTO]	29	4	1	4	23.6	20.563	4.91943	9	8	6	0	6	0.000684203	0.00136356	0.00122599	0	0.000200407	0.000818438	4.08387
K9F210	CRISPR-associated protein cas7/cse4/casc, subtype I-e OS=Actinobaculum massiliense ACS-171-V-Col2 OX=883066 GN=HMPREF9233_00302 PE=4 SV=1 - [K9F210_9ACTO]	57	10	1	10	36.58	41.5991	5.07178	18	1	6	1	31	0.00136841	0.000170445	0.00122599	0.000487805	0.00103544	0.000813161	0.78533
K9ED70	S-adenosylmethionine synthase OS=Actinobaculum massiliense ACS-171-V-Col2 OX=883066 GN=metK PE=3 SV=1 - [K9ED70_9ACTO]	32	6	1	6	21.16	42.7267	5.26221	13	6	6	0	7	0.000988293	0.00102267	0.00122599	0	0.000233809	0.000809238	3.46111
K9EE13	Phosphomethylpyrimidine kinase OS=Actinobaculum massiliense ACS-171-V-Col2 OX=883066 GN=HMPREF9233_00814 PE=4 SV=1 - [K9EE13_9ACTO]	52	6	1	6	38.2	28.3543	4.7417	25	5	2	0	20	0.00190056	0.000852224	0.000408664	0	0.000668025	0.000790363	1.18313
K9EEH6	Alpha-1,4 glucan phosphorylase OS=Actinobaculum massiliense ACS-171-V-Col2 OX=883066 GN=HMPREF9233_00844 PE=3 SV=1 - [K9EEH6_9ACTO]	126	16	1	16	32.63	90.8852	4.95752	31	2	2	0	91	0.0023567	0.00034089	0.000408664	0	0.00303951	0.000776563	0.255489
K9F1Y4	Ribose 5-phosphate isomerase OS=Actinobaculum massiliense ACS-171-V-Col2 OX=883066 GN=HMPREF9233_00267 PE=4 SV=1 - [K9F1Y4_9ACTO]	55	7	1	7	55.33	16.5322	5.36377	13	5	6	0	31	0.000988293	0.000852224	0.00122599	0	0.00103544	0.000766627	0.740389
K9EJP5	Translation initiation factor IF-2 OS=Actinobaculum massiliense ACS-171-V-Col2 OX=883066 GN=infB PE=3 SV=1 - [K9EJP5_9ACTO]	62	15	1	15	21.72	102.84	7.18115	19	7	2	0	34	0.00144443	0.00119311	0.000408664	0	0.00113564	0.000761551	0.670591
K9EV35	50S ribosomal protein L36 OS=Actinobaculum massiliense ACS-171-V-Col2 OX=883066 GN=rpmJ PE=3 SV=1 - [K9EV35_9ACTO]	15	1	1	1	24.32	4.36132	11.3999	3	3	4	3	2	0.000228068	0.000511335	0.000817327	0.00146341	6.68025e-05	0.000755036	11.3025
K9EG34	Uncharacterized protein OS=Actinobaculum massiliense ACS-171-V-Col2 OX=883066 GN=HMPREF9233_00415 PE=4 SV=1 - [K9EG34_9ACTO]	207	4	1	4	47.9	18.1368	9.45166	22	1	3	1	180	0.0016725	0.000170445	0.000612996	0.000487805	0.00601222	0.000735935	0.122406
K9EJI5	N-acetylglucosamine-6-phosphate deacetylase OS=Actinobaculum massiliense ACS-171-V-Col2 OX=883066 GN=HMPREF9233_00109 PE=3 SV=1 - [K9EJI5_9ACTO]	13	6	1	6	21.19	40.822	5.09717	0	0	12	1	0	0	0	0.00245198	0.000487805	0	0.000734947	#NUM!
K9EC48	50S ribosomal protein L24 OS=Actinobaculum massiliense ACS-171-V-Col2 OX=883066 GN=rplX PE=3 SV=1 - [K9EC48_9ACTO]	32	3	1	3	16.67	12.6499	10.4038	9	8	4	0	11	0.000684203	0.00136356	0.000817327	0	0.000367414	0.000716272	1.9495
K9EFE4	Threonine--tRNA ligase OS=Actinobaculum massiliense ACS-171-V-Col2 OX=883066 GN=thrS PE=3 SV=1 - [K9EFE4_9ACTO]	81	16	1	16	32.64	76.2679	5.24951	25	3	2	0	51	0.00190056	0.000511335	0.000408664	0	0.00170346	0.00070514	0.413945
K9EC02	Ribosome hibernation promoting factor OS=Actinobaculum massiliense ACS-171-V-Col2 OX=883066 GN=hpf PE=3 SV=1 - [K9EC02_9ACTO]	156	8	1	8	48.6	24.2364	5.68115	15	0	1	3	137	0.00114034	0	0.000204332	0.00146341	0.00457597	0.000702021	0.153415
K9ECV5	Uncharacterized protein OS=Actinobaculum massiliense ACS-171-V-Col2 OX=883066 GN=HMPREF9233_00860 PE=4 SV=1 - [K9ECV5_9ACTO]	108	9	1	9	35.99	43.4032	4.51318	14	9	1	0	84	0.00106432	0.001534	0.000204332	0	0.0028057	0.000700663	0.249728
K9EI86	Transcription termination factor Rho OS=Actinobaculum massiliense ACS-171-V-Col2 OX=883066 GN=rho PE=3 SV=1 - [K9EI86_9ACTO]	104	20	1	20	39.32	70.8938	9.74463	17	5	3	0	79	0.00129238	0.000852224	0.000612996	0	0.0026387	0.000689401	0.261265
K9EG63	50S ribosomal protein L17 OS=Actinobaculum massiliense ACS-171-V-Col2 OX=883066 GN=rplQ PE=3 SV=1 - [K9EG63_9ACTO]	49	4	1	4	22.46	20.5935	4.98291	16	3	5	0	25	0.00121636	0.000511335	0.00102166	0	0.000835031	0.000687338	0.823129
K9EX92	ATP synthase subunit b OS=Actinobaculum massiliense ACS-171-V-Col2 OX=883066 GN=atpF PE=3 SV=1 - [K9EX92_9ACTO]	31	6	1	6	40.22	19.5011	4.88135	11	3	2	2	13	0.000836248	0.000511335	0.000408664	0.00097561	0.000434216	0.000682964	1.57287
K9ECW8	50S ribosomal protein L21 OS=Actinobaculum massiliense ACS-171-V-Col2 OX=883066 GN=rplU PE=3 SV=1 - [K9ECW8_9ACTO]	39	3	1	3	42.57	10.9461	9.72998	9	6	5	0	19	0.000684203	0.00102267	0.00102166	0	0.000634624	0.000682133	1.07486
K9EJE6	Uncharacterized protein OS=Actinobaculum massiliense ACS-171-V-Col2 OX=883066 GN=HMPREF9233_00044 PE=4 SV=1 - [K9EJE6_9ACTO]	41	5	1	5	40.17	24.8417	4.71631	11	1	6	1	22	0.000836248	0.000170445	0.00122599	0.000487805	0.000734827	0.000680122	0.925553
K9F020	50S ribosomal protein L16 OS=Actinobaculum massiliense ACS-171-V-Col2 OX=883066 GN=rplP PE=3 SV=1 - [K9F020_9ACTO]	36	3	1	3	29.71	15.6484	10.77	23	2	3	0	8	0.00174852	0.00034089	0.000612996	0	0.00026721	0.000675601	2.52835
K9EF81	Leucine--tRNA ligase OS=Actinobaculum massiliense ACS-171-V-Col2 OX=883066 GN=leuS PE=3 SV=1 - [K9EF81_9ACTO]	56	14	1	14	21.36	108.743	4.93213	12	0	6	1	37	0.00091227	0	0.00122599	0.000487805	0.00123585	0.000656516	0.531228
K9F113	Uncharacterized protein OS=Actinobaculum massiliense ACS-171-V-Col2 OX=883066 GN=HMPREF9233_00946 PE=4 SV=1 - [K9F113_9ACTO]	121	7	1	6	53.55	23.1331	7.12256	16	8	0	0	97	0.00121636	0.00136356	0	0	0.00323992	0.00064498	0.199073
K9EG54	50S ribosomal protein L30 OS=Actinobaculum massiliense ACS-171-V-Col2 OX=883066 GN=rpmD PE=3 SV=1 - [K9EG54_9ACTO]	25	2	1	2	33.9	6.56266	9.979	7	6	5	0	7	0.000532158	0.00102267	0.00102166	0	0.000233809	0.000644121	2.75491
K9EJG3	Glutamine synthetase OS=Actinobaculum massiliense ACS-171-V-Col2 OX=883066 GN=HMPREF9233_00074 PE=3 SV=1 - [K9EJG3_9ACTO]	37	10	1	10	30.25	53.7963	5.0083	5	2	9	0	21	0.000380113	0.00034089	0.00183899	0	0.000701426	0.000639997	0.912423
K9F141	Chlorophyll synthesis pathway, bchC OS=Actinobaculum massiliense ACS-171-V-Col2 OX=883066 GN=HMPREF9233_00966 PE=3 SV=1 - [K9F141_9ACTO]	314	13	1	13	55.83	38.6856	4.99561	17	5	2	0	290	0.00129238	0.000852224	0.000408664	0	0.00968636	0.000638318	0.0658986
K9EHU4	ATP-dependent 6-phosphofructokinase OS=Actinobaculum massiliense ACS-171-V-Col2 OX=883066 GN=pfkA PE=3 SV=1 - [K9EHU4_9ACTO]	47	8	1	8	30.32	39.4164	6.20166	8	0	7	1	31	0.00060818	0	0.00143032	0.000487805	0.00103544	0.000631577	0.609961
K9EFX3	Isoleucine--tRNA ligase OS=Actinobaculum massiliense ACS-171-V-Col2 OX=883066 GN=ileS PE=3 SV=1 - [K9EFX3_9ACTO]	53	12	1	11	17.93	121.25	4.97021	22	5	0	0	26	0.0016725	0.000852224	0	0	0.000868432	0.00063118	0.726804
K9EDU5	Protein translocase subunit SecY OS=Actinobaculum massiliense ACS-171-V-Col2 OX=883066 GN=secY PE=3 SV=1 - [K9EDU5_9ACTO]	28	3	1	3	8.53	47.8092	9.68604	6	5	1	2	14	0.000456135	0.000852224	0.000204332	0.00097561	0.000467617	0.000622075	1.33031
K9EEY4	Uncharacterized protein OS=Actinobaculum massiliense ACS-171-V-Col2 OX=883066 GN=HMPREF9233_00994 PE=4 SV=1 - [K9EEY4_9ACTO]	64	7	1	7	32.67	43.5019	4.4751	11	0	3	2	48	0.000836248	0	0.000612996	0.00097561	0.00160326	0.000606213	0.378113
K9ECX2	Thioredoxin OS=Actinobaculum massiliense ACS-171-V-Col2 OX=883066 GN=HMPREF9233_01475 PE=3 SV=1 - [K9ECX2_9ACTO]	24	3	1	3	44	13.7508	4.52588	9	3	6	0	6	0.000684203	0.000511335	0.00122599	0	0.000200407	0.000605382	3.02076
K9EF52	Uncharacterized protein OS=Actinobaculum massiliense ACS-171-V-Col2 OX=883066 GN=HMPREF9233_01443 PE=4 SV=1 - [K9EF52_9ACTO]	47	7	1	7	39.36	26.4524	4.93213	13	0	7	0	27	0.000988293	0	0.00143032	0	0.000901834	0.000604654	0.670472
K9EED5	ATP synthase subunit a OS=Actinobaculum massiliense ACS-171-V-Col2 OX=883066 GN=atpB PE=3 SV=1 - [K9EED5_9ACTO]	18	2	1	2	8.76	29.8171	8.63135	5	3	0	3	7	0.000380113	0.000511335	0	0.00146341	0.000233809	0.000588715	2.51794
K9EFJ1	Phenylalanine--tRNA ligase beta subunit OS=Actinobaculum massiliense ACS-171-V-Col2 OX=883066 GN=pheT PE=3 SV=1 - [K9EFJ1_9ACTO]	56	18	1	18	29.89	92.5546	5.03369	12	0	2	2	40	0.00091227	0	0.000408664	0.00097561	0.00133605	0.000574136	0.429726
K9F2G2	Uncharacterized protein OS=Actinobaculum massiliense ACS-171-V-Col2 OX=883066 GN=HMPREF9233_00447 PE=4 SV=1 - [K9F2G2_9ACTO]	19	5	1	5	25.58	36.0461	4.58936	10	9	0	0	0	0.000760225	0.001534	0	0	0	0.000573557	#NUM!
K9EIG2	Glucarate dehydratase OS=Actinobaculum massiliense ACS-171-V-Col2 OX=883066 GN=HMPREF9233_00458 PE=3 SV=1 - [K9EIG2_9ACTO]	50	9	1	9	30.56	49.2606	5.23682	30	0	0	0	20	0.00228068	0	0	0	0.000668025	0.000570169	0.853514
K9EC63	30S ribosomal protein S11 OS=Actinobaculum massiliense ACS-171-V-Col2 OX=883066 GN=rpsK PE=3 SV=1 - [K9EC63_9ACTO]	71	5	1	5	62.12	14.0193	11.4585	17	1	4	0	49	0.00129238	0.000170445	0.000817327	0	0.00163666	0.000570039	0.348294
K9EEF7	UDP-glucose 6-dehydrogenase OS=Actinobaculum massiliense ACS-171-V-Col2 OX=883066 GN=HMPREF9233_01201 PE=3 SV=1 - [K9EEF7_9ACTO]	35	10	1	10	36.6	42.6319	5.66846	11	0	7	0	17	0.000836248	0	0.00143032	0	0.000567821	0.000566643	0.997924
K9EE22	Anthranilate phosphoribosyltransferase OS=Actinobaculum massiliense ACS-171-V-Col2 OX=883066 GN=trpD PE=3 SV=1 - [K9EE22_9ACTO]	83	9	1	9	42.73	35.764	5.03369	23	3	0	0	57	0.00174852	0.000511335	0	0	0.00190387	0.000564963	0.296744
K9EHM2	Uncharacterized protein OS=Actinobaculum massiliense ACS-171-V-Col2 OX=883066 GN=HMPREF9233_00706 PE=4 SV=1 - [K9EHM2_9ACTO]	24	5	1	5	28.57	29.2582	8.96826	20	3	1	0	0	0.00152045	0.000511335	0.000204332	0	0	0.000559029	#NUM!
K9EHG7	Transcription termination/antitermination protein NusA OS=Actinobaculum massiliense ACS-171-V-Col2 OX=883066 GN=nusA PE=3 SV=1 - [K9EHG7_9ACTO]	48	9	1	8	31.56	37.2792	5.30029	15	4	2	0	27	0.00114034	0.000681779	0.000408664	0	0.000901834	0.000557695	0.618401
K9EFH6	Guanylate kinase OS=Actinobaculum massiliense ACS-171-V-Col2 OX=883066 GN=gmk PE=3 SV=1 - [K9EFH6_9ACTO]	21	6	1	6	38.83	20.5237	4.91943	3	2	8	0	8	0.000228068	0.00034089	0.00163465	0	0.00026721	0.000550903	2.06169
K9EZ80	Uncharacterized protein OS=Actinobaculum massiliense ACS-171-V-Col2 OX=883066 GN=HMPREF9233_01487 PE=4 SV=1 - [K9EZ80_9ACTO]	49	3	1	3	30.14	16.1033	4.89404	6	3	6	0	34	0.000456135	0.000511335	0.00122599	0	0.00113564	0.000548365	0.482868
K9EG41	50S ribosomal protein L29 OS=Actinobaculum massiliense ACS-171-V-Col2 OX=883066 GN=rpmC PE=3 SV=1 - [K9EG41_9ACTO]	44	1	1	1	24	8.66763	8.52881	8	4	2	1	29	0.00060818	0.000681779	0.000408664	0.000487805	0.000968636	0.000546607	0.564306
K9F0B1	GMP synthase [glutamine-hydrolyzing] OS=Actinobaculum massiliense ACS-171-V-Col2 OX=883066 GN=guaA PE=3 SV=1 - [K9F0B1_9ACTO]	108	16	1	15	48.08	56.1116	5.12256	22	3	0	0	83	0.0016725	0.000511335	0	0	0.0027723	0.000545957	0.196933
K9ED77	Uncharacterized protein OS=Actinobaculum massiliense ACS-171-V-Col2 OX=883066 GN=HMPREF9233_00970 PE=4 SV=1 - [K9ED77_9ACTO]	12	1	1	1	2.5	48.813	6.27783	6	2	2	2	0	0.000456135	0.00034089	0.000408664	0.00097561	0	0.000545325	#NUM!
K9EF56	UDP-N-acetylglucosamine 1-carboxyvinyltransferase OS=Actinobaculum massiliense ACS-171-V-Col2 OX=883066 GN=murA PE=3 SV=1 - [K9EF56_9ACTO]	45	11	1	11	30.57	52.9677	6.62451	15	2	1	1	26	0.00114034	0.00034089	0.000204332	0.000487805	0.000868432	0.000543341	0.625657
K9F218	Ketol-acid reductoisomerase (NADP(+)) OS=Actinobaculum massiliense ACS-171-V-Col2 OX=883066 GN=ilvC PE=3 SV=1 - [K9F218_9ACTO]	32	4	1	4	16.37	37.3365	4.89404	10	7	1	0	14	0.000760225	0.00119311	0.000204332	0	0.000467617	0.000539418	1.15354
K9EDP5	Transcription termination/antitermination protein NusG OS=Actinobaculum massiliense ACS-171-V-Col2 OX=883066 GN=nusG PE=3 SV=1 - [K9EDP5_9ACTO]	42	5	1	5	30.56	31.3371	4.31006	12	2	2	1	25	0.00091227	0.00034089	0.000408664	0.000487805	0.000835031	0.000537407	0.643577
K9EI09	Uncharacterized protein OS=Actinobaculum massiliense ACS-171-V-Col2 OX=883066 GN=HMPREF9233_00273 PE=4 SV=1 - [K9EI09_9ACTO]	39	3	1	3	17.17	21.6726	4.51318	7	1	7	0	24	0.000532158	0.000170445	0.00143032	0	0.00080163	0.000533231	0.665184
[truncated: 749 more rows]

## Sheet: All human proteins_normalized
Accession	Description	Σ# PSMs	Σ# Peptides	Σ# Proteins	Σ# Unique Peptides	ΣCoverage	MW [kDa]	calc. pI	CB27	CB37	CB5	CB17	SD_#6	norm CB27	norm CB37	norm CB5	norm CB17	norm SD_#6	Average CB
[truncated: 1,394 more rows]
