# Supplementary material for: <em>Actinobaculum massiliense</em> Proteome Profiled in Polymicrobial Urethral Catheter Biofilms
Source: Preprints.org preprint supplement (doi:10.20944/preprints201809.0500.v1), 2018-09-26
Supplement: Supplementary file 1 [file supplementary]

**Table S1.** Metaproteomic database searches and entire genome sequence-derived protein sequence entries (ORFs) from Homo Sapiens and microbial species colonizing the human urogenital tract, bladder catheters and cause urinary tract infections.

| No. | Microbial species and strain                                                     | UniProt web link                                                                              | Number of ORFs / proteins | Taxon identifier |
|-----|----------------------------------------------------------------------------------|-----------------------------------------------------------------------------------------------|---------------------------|------------------|
| 1   | Homo sapiens (Reviewed)                                                          | <a href="http://www.uniprot.org/taxonomy/9606">http://www.uniprot.org/taxonomy/9606</a>       | 20,259                    | 9606             |
| 2   | Actinotignum schaalii FB123-CNA-2                                                | <a href="http://www.uniprot.org/taxonomy/883067">http://www.uniprot.org/taxonomy/883067</a>   | 1,726                     | 883067           |
| 3   | Aerococcus urinae (strain ACS-120-V-Col10a)                                      | <a href="http://www.uniprot.org/taxonomy/866775">http://www.uniprot.org/taxonomy/866775</a>   | 1,684                     | 866775           |
| 4   | Bacteroides fragilis (strain 638R)                                               | <a href="http://www.uniprot.org/taxonomy/862962">http://www.uniprot.org/taxonomy/862962</a>   | 4,284                     | 862962           |
| 5   | Candida albicans (strain WO-1)                                                   | <a href="http://www.uniprot.org/taxonomy/294748">http://www.uniprot.org/taxonomy/294748</a>   | 5,742                     | 294748           |
| 6   | Citrobacter koseri (strain ATCC BAA-895 / CDC 4225-83 / SGSC4696)                | <a href="http://www.uniprot.org/taxonomy/290338">http://www.uniprot.org/taxonomy/290338</a>   | 5,020                     | 290338           |
| 7   | Corynebacterium urealyticum (strain ATCC 43042 / DSM 7109)                       | <a href="http://www.uniprot.org/taxonomy/504474">http://www.uniprot.org/taxonomy/504474</a>   | 2,011                     | 504474           |
| 8   | Enterobacter cloacae subsp. cloacae (strain ATCC 13047 / DSM 30054 / NBRC 13535) | <a href="http://www.uniprot.org/taxonomy/716541">http://www.uniprot.org/taxonomy/716541</a>   | 5,411                     | 716541           |
| 9   | Enterococcus faecalis (strain ATCC 700802 / V583)                                | <a href="http://www.uniprot.org/taxonomy/226185">http://www.uniprot.org/taxonomy/226185</a>   | 3,240                     | 226185           |
| 10  | Escherichia coli (strain UTI89 / UPEC)                                           | <a href="http://www.uniprot.org/taxonomy/364106">http://www.uniprot.org/taxonomy/364106</a>   | 5,192                     | 364106           |
| 11  | Gardnerella vaginalis (strain ATCC 14019 / 317)                                  | <a href="http://www.uniprot.org/taxonomy/525284">http://www.uniprot.org/taxonomy/525284</a>   | 1,365                     | 525284           |
| 12  | Klebsiella pneumoniae (strain 342)                                               | <a href="http://www.uniprot.org/taxonomy/507522">http://www.uniprot.org/taxonomy/507522</a>   | 5,738                     | 507522           |
| 13  | Lactobacillus gasseri (strain ATCC 33323 / DSM 20243)                            | <a href="http://www.uniprot.org/taxonomy/324831">http://www.uniprot.org/taxonomy/324831</a>   | 1,694                     | 324831           |
| 14  | Morganella morganii subsp. morganii KT                                           | <a href="http://www.uniprot.org/taxonomy/1124991">http://www.uniprot.org/taxonomy/1124991</a> | 3,510                     | 1124991          |
| 15  | Prevotella melaninogenica D18                                                    | <a href="http://www.uniprot.org/taxonomy/575612">http://www.uniprot.org/taxonomy/575612</a>   | 2,461                     | 575612           |
| 16  | Proteus mirabilis (strain HI4320)                                                | <a href="http://www.uniprot.org/taxonomy/529507">http://www.uniprot.org/taxonomy/529507</a>   | 3,661                     | 529507           |
| 17  | Providencia stuartii (strain MRSN 2154)                                          | <a href="http://www.uniprot.org/taxonomy/1157951">http://www.uniprot.org/taxonomy/1157951</a> | 4,219                     | 1157951          |
| 18  | Pseudomonas aeruginosa (strain PA7)                                              | <a href="http://www.uniprot.org/taxonomy/381754">http://www.uniprot.org/taxonomy/381754</a>   | 6,246                     | 381754           |
| 19  | Serratia marcescens WW4                                                          | <a href="http://www.uniprot.org/taxonomy/435998">http://www.uniprot.org/taxonomy/435998</a>   | 4,801                     | 435998           |

|    |                                                                                   |                                                                                             |       |        |
|----|-----------------------------------------------------------------------------------|---------------------------------------------------------------------------------------------|-------|--------|
| 20 | Staphylococcus aureus (strain USA300 / TCH1516)                                   | <a href="http://www.uniprot.org/taxonomy/451516">http://www.uniprot.org/taxonomy/451516</a> | 2,694 | 451516 |
| 21 | Staphylococcus saprophyticus subsp. saprophyticus (strain ATCC 15305 / DSM 20229) | <a href="http://www.uniprot.org/taxonomy/342451">http://www.uniprot.org/taxonomy/342451</a> | 2,404 | 342451 |
| 22 | Streptococcus agalactiae serotype V (strain ATCC BAA-611 / 2603 V/R)              | <a href="http://www.uniprot.org/taxonomy/208435">http://www.uniprot.org/taxonomy/208435</a> | 2,105 | 208435 |
| 23 | Mycoplasma genitalium (strain ATCC 33530 / G-37 / NCTC 10195)                     | <a href="http://www.uniprot.org/taxonomy/243273">http://www.uniprot.org/taxonomy/243273</a> | 484   | 243273 |
| 24 | Ureaplasma urealyticum serovar 10 (strain ATCC 33699 / Western)                   | <a href="http://www.uniprot.org/taxonomy/565575">http://www.uniprot.org/taxonomy/565575</a> | 646   | 565575 |
| 25 | Staphylococcus saprophyticus subsp. saprophyticus (strain ATCC 15305 / DSM 20229) | <a href="http://www.uniprot.org/taxonomy/342451">http://www.uniprot.org/taxonomy/342451</a> | 2,404 | 342451 |
| 26 | Actinobaculum massiliense ACS-171-V-Col2                                          | <a href="http://www.uniprot.org/taxonomy/883066">http://www.uniprot.org/taxonomy/883066</a> | 1,696 | 883066 |
| 27 | Propionimicrobium lymphophilum ACS-093-V-SCH5                                     | <a href="http://www.uniprot.org/taxonomy/883161">http://www.uniprot.org/taxonomy/883161</a> | 2,076 | 883161 |

Microbial protein sequence databases are listed with their "UniProt proteome" names, links and numerical taxon identifiers. The database searches identified experimentally generated tryptic peptide fragments via peptide spectral matches with tryptic peptides *in silico* processed from the protein sequences annotated in the "UniProt" proteomes. In the initial stages, searches were performed with this common metaproteomic database until selective searches were introduced to reflect the true presence of all moderate to high abundance microbes in a clinical sample. Thus, the searches are computational comparisons of LC-MS/MS spectra with predicted mass spectral patterns. *Actinotignum massiliense*, added for the purpose on the specific interest in its proteome for this publication, is listed as the final species/strain and associated database.
